# Supplementary material for: Plausible PEPPSI catalysts for direct C–H functionalization of five-membered heterocyclic bioactive motifs: synthesis, spectral, X-ray crystallographic characterizations and catalytic activity
Source: Royal Society of Chemistry journal article supplement (doi:10.1039/d3ra06334h), 2023-01-01

A table of contents entry

**Plausible PEPPSI Catalysts for Direct C-H Functionalization of Five-Membered Heterocyclic Bioactive Motifs: Synthesis, characterization and catalytic activity**

*Donia Bensalah, Lamjed Mansour, Mathieu Sauthier, Nevin Gurbuz Ismail Özdemir, Lotfi Beji, Rafik Gatri and Naceur Hamdi*

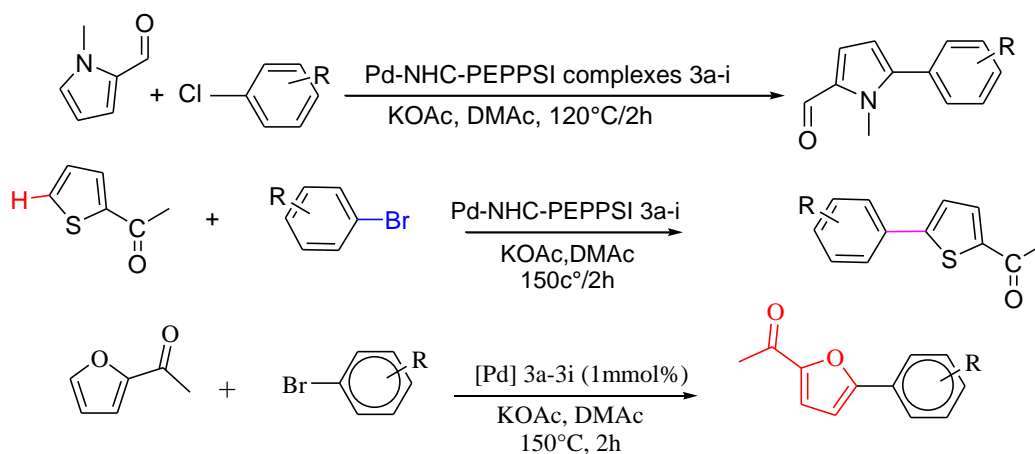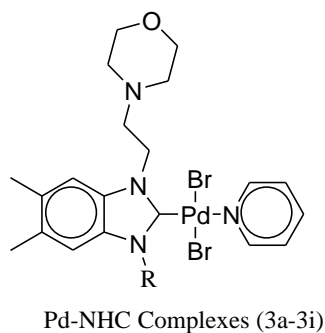

- 3a, R = CH<sub>2</sub>-Ph(Me)<sub>4</sub>-1,2,4,6
- 3b, R = CH<sub>2</sub>-Ph(Me)<sub>5</sub>-1,2,3,4,5
- 3c, R = CH<sub>2</sub>-C<sub>4</sub>H<sub>6</sub>
- 3d, R = CH<sub>2</sub>-PhCl-4
- 3e, R = CH<sub>2</sub>-Ph
- 3f, R = CH<sub>2</sub>-CH<sub>2</sub>-O-CH<sub>3</sub>
- 3g, R = CH<sub>2</sub>-CH<sub>2</sub>-O-CH<sub>2</sub>-CH<sub>3</sub>
- 3h, R = CH<sub>2</sub>-Ph(tBu)<sub>2</sub>-2,4
- 3i, R = CH<sub>2</sub>-Ph(tbu)-4

2a

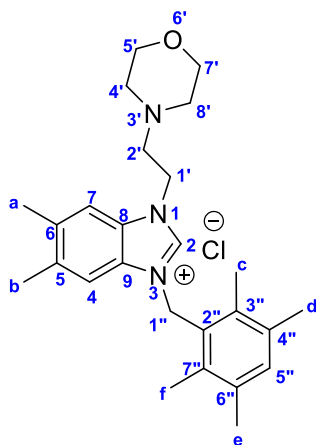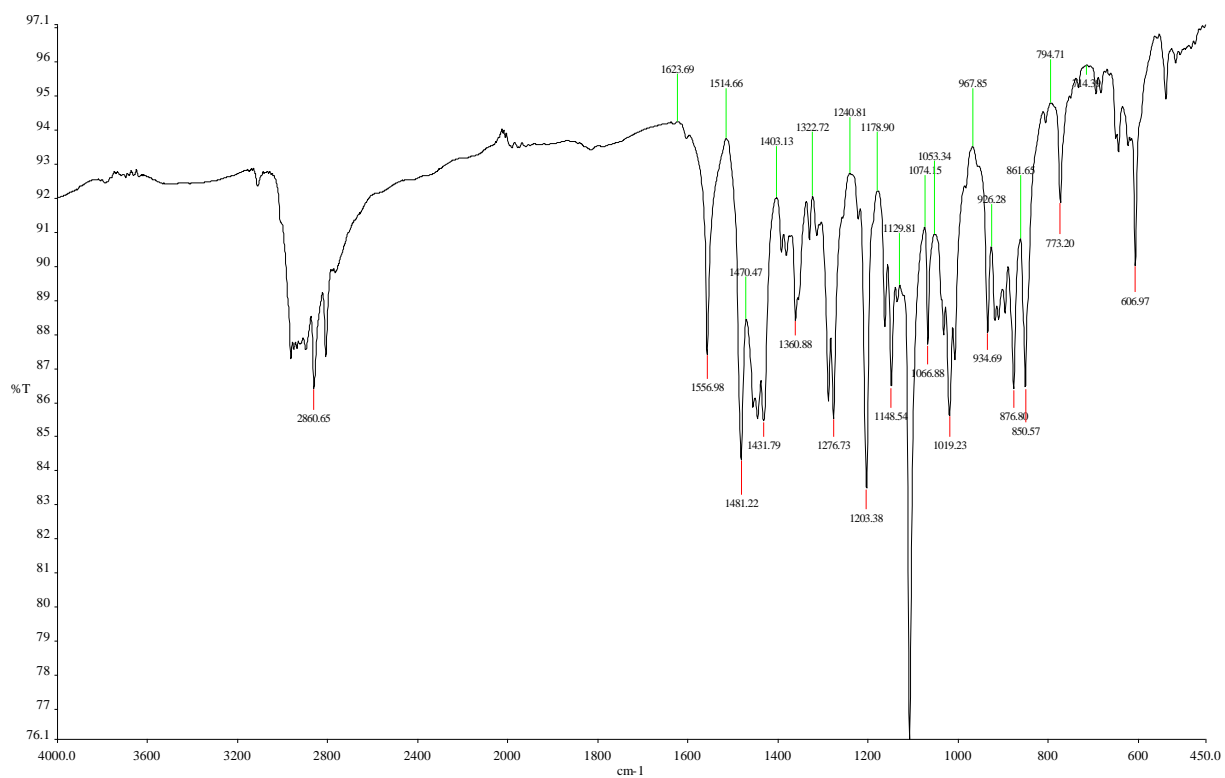

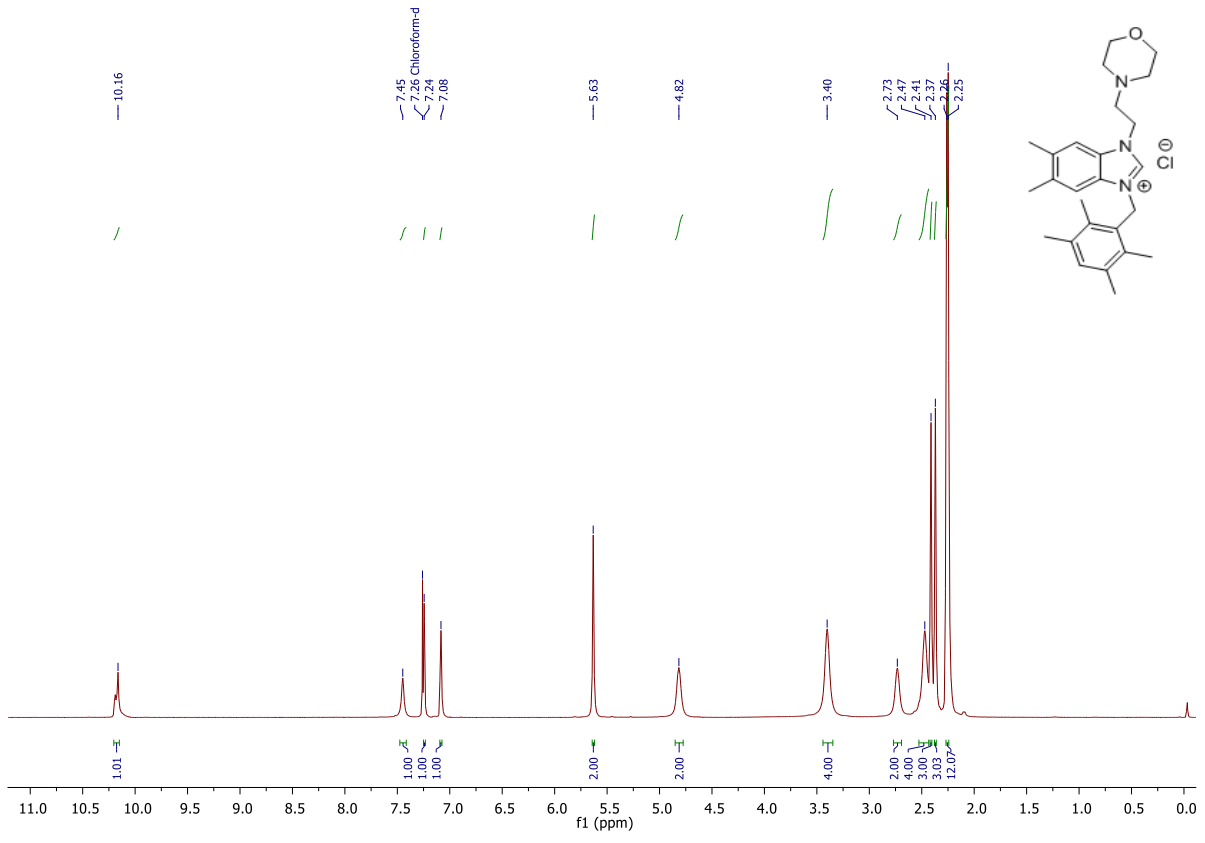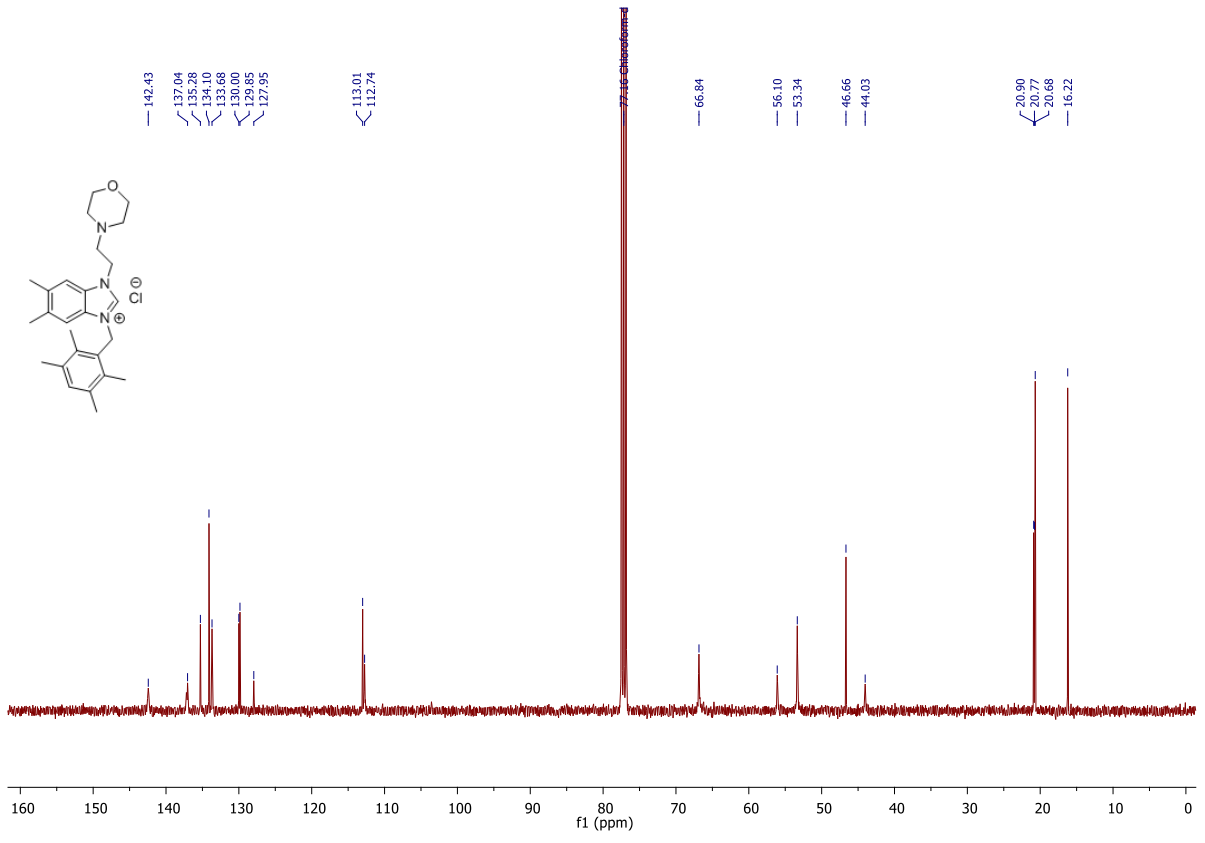

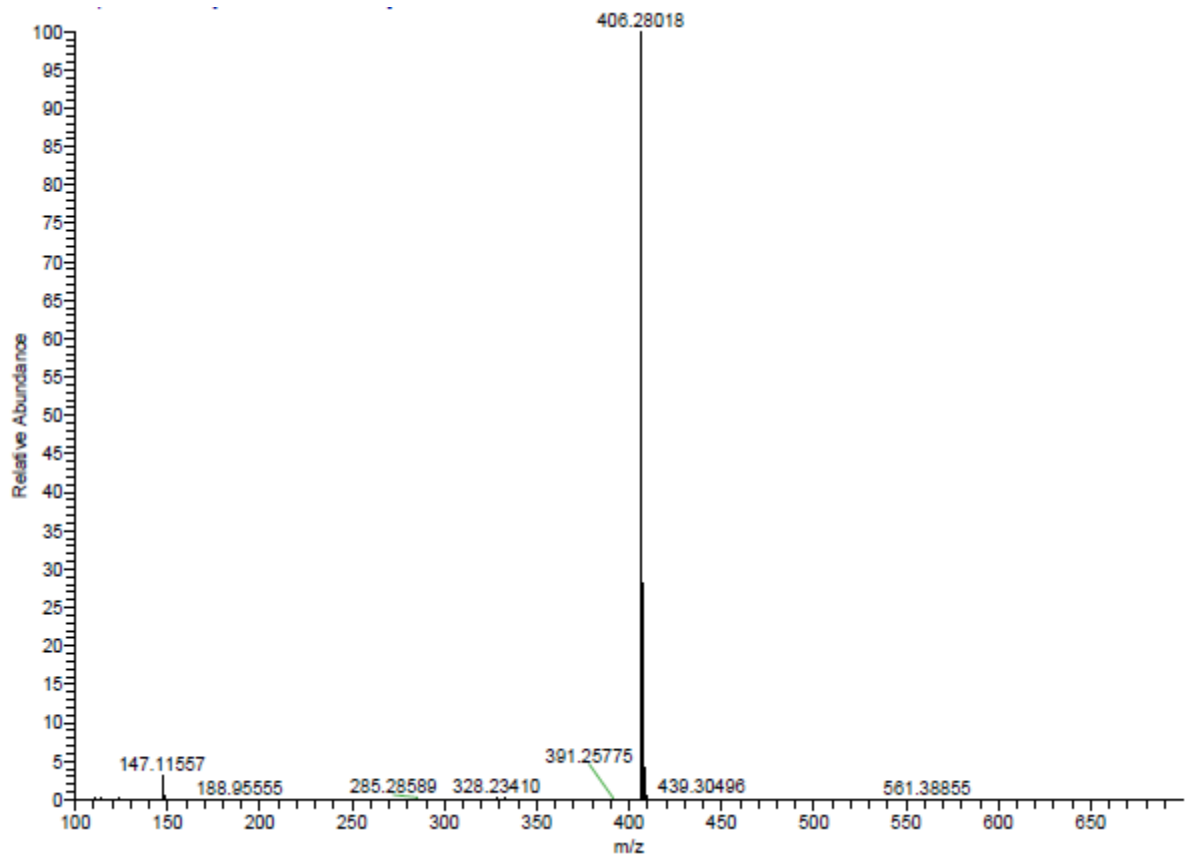

2b

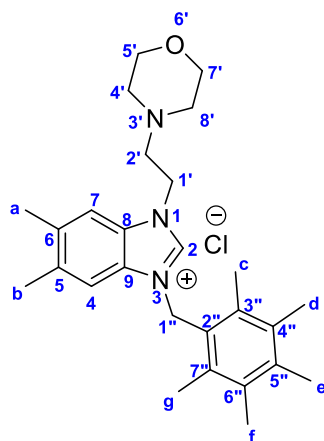

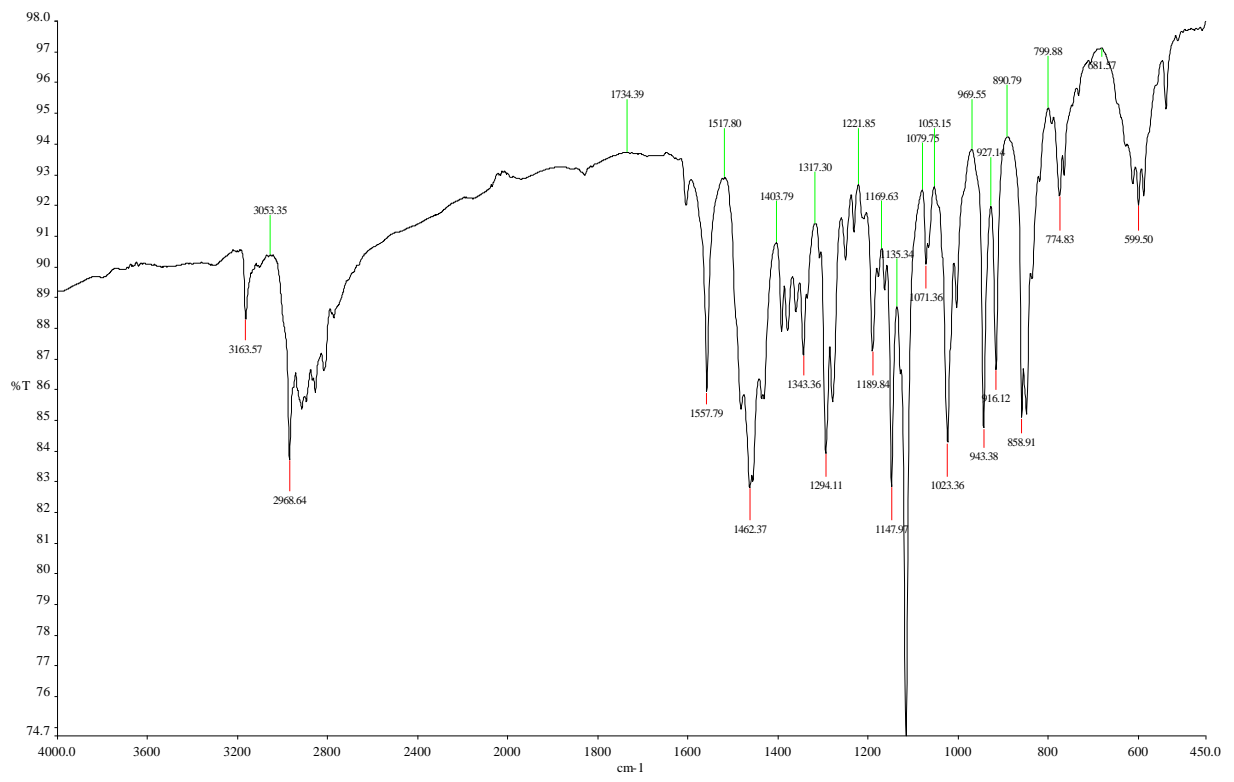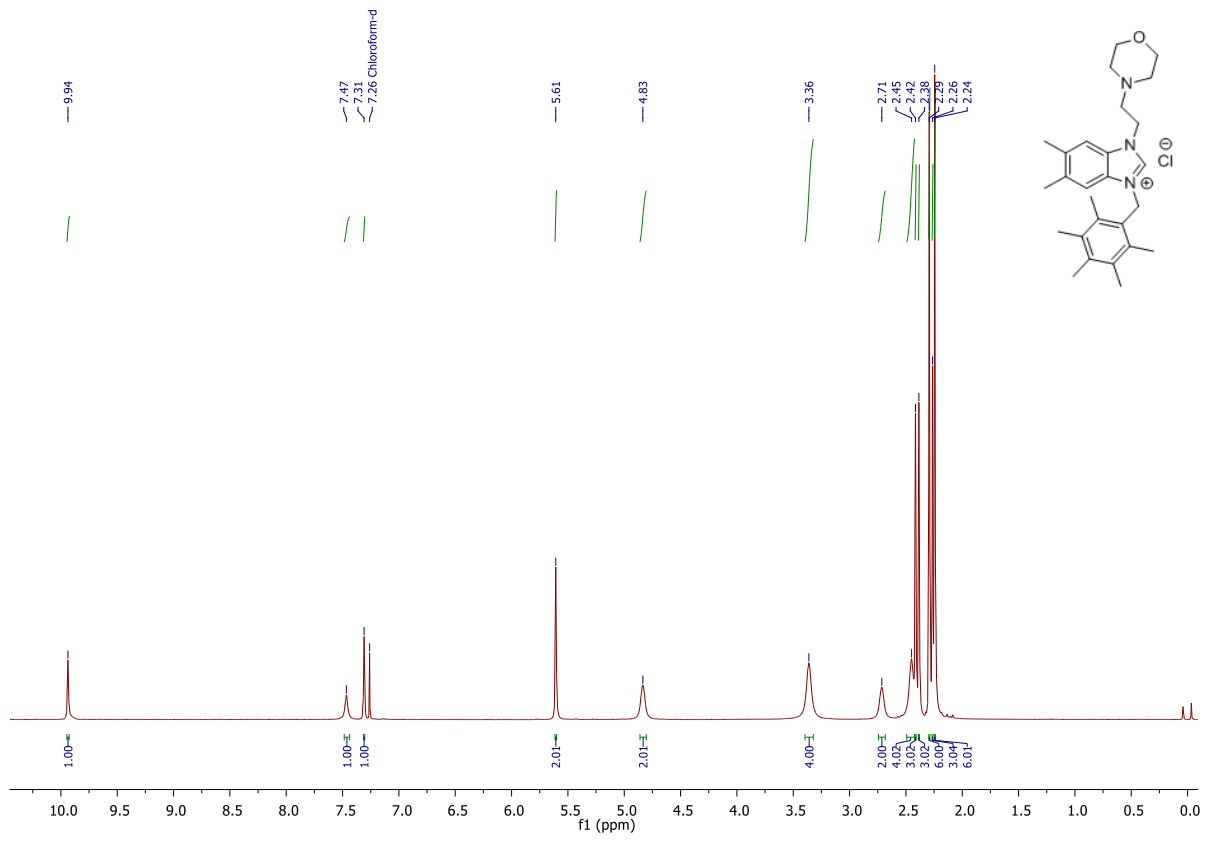

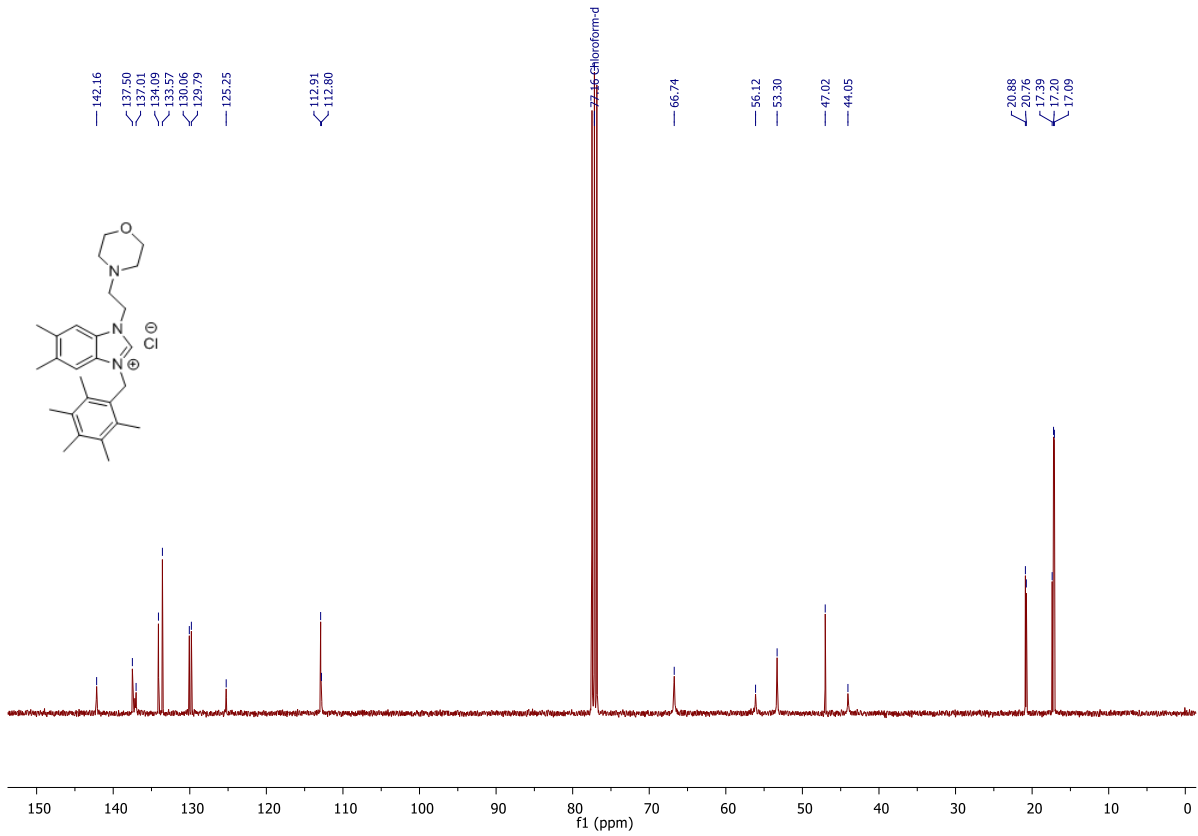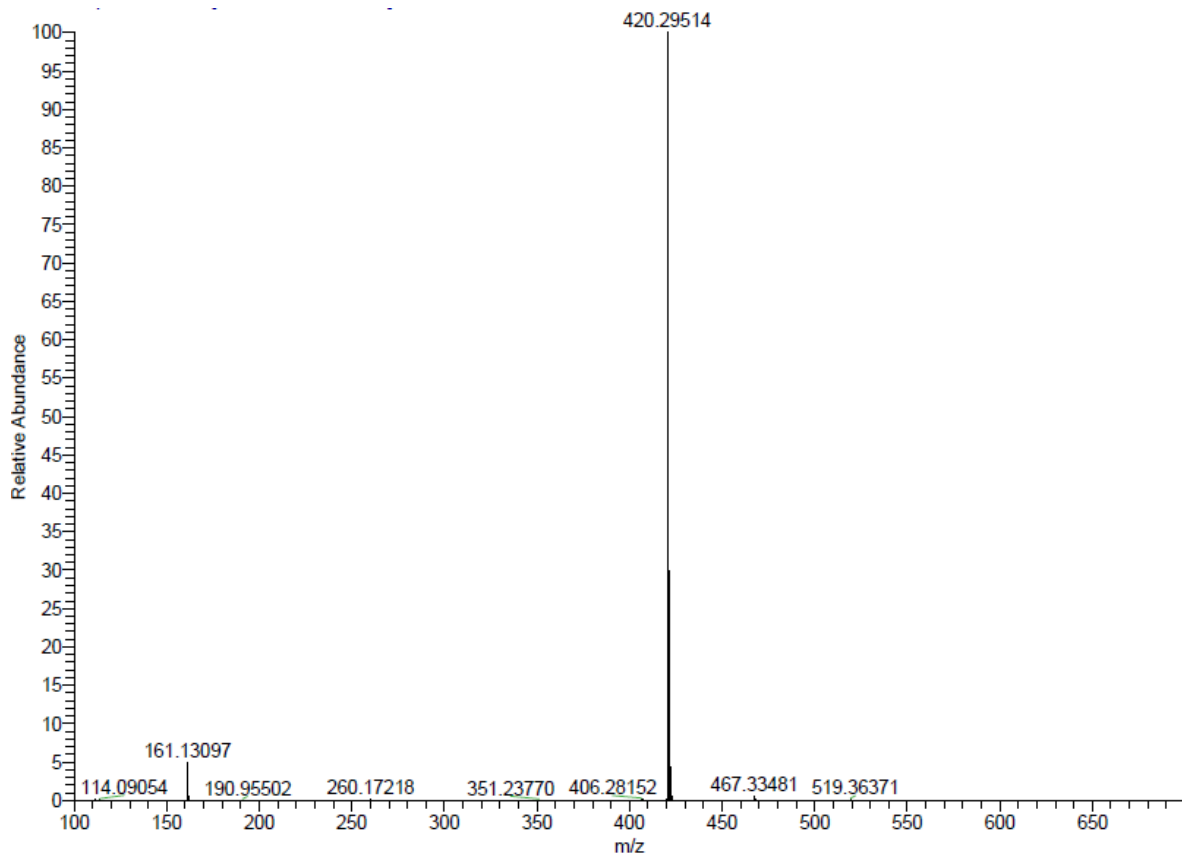

2c

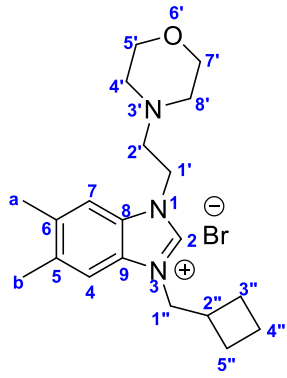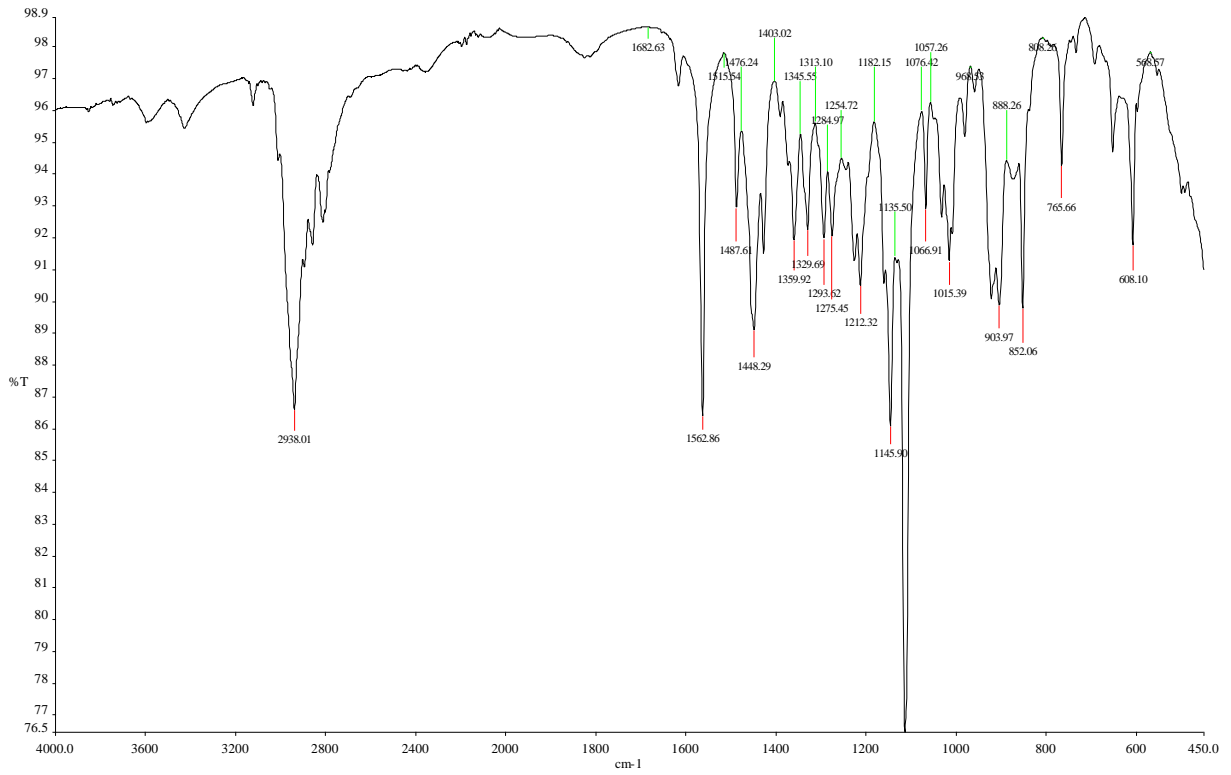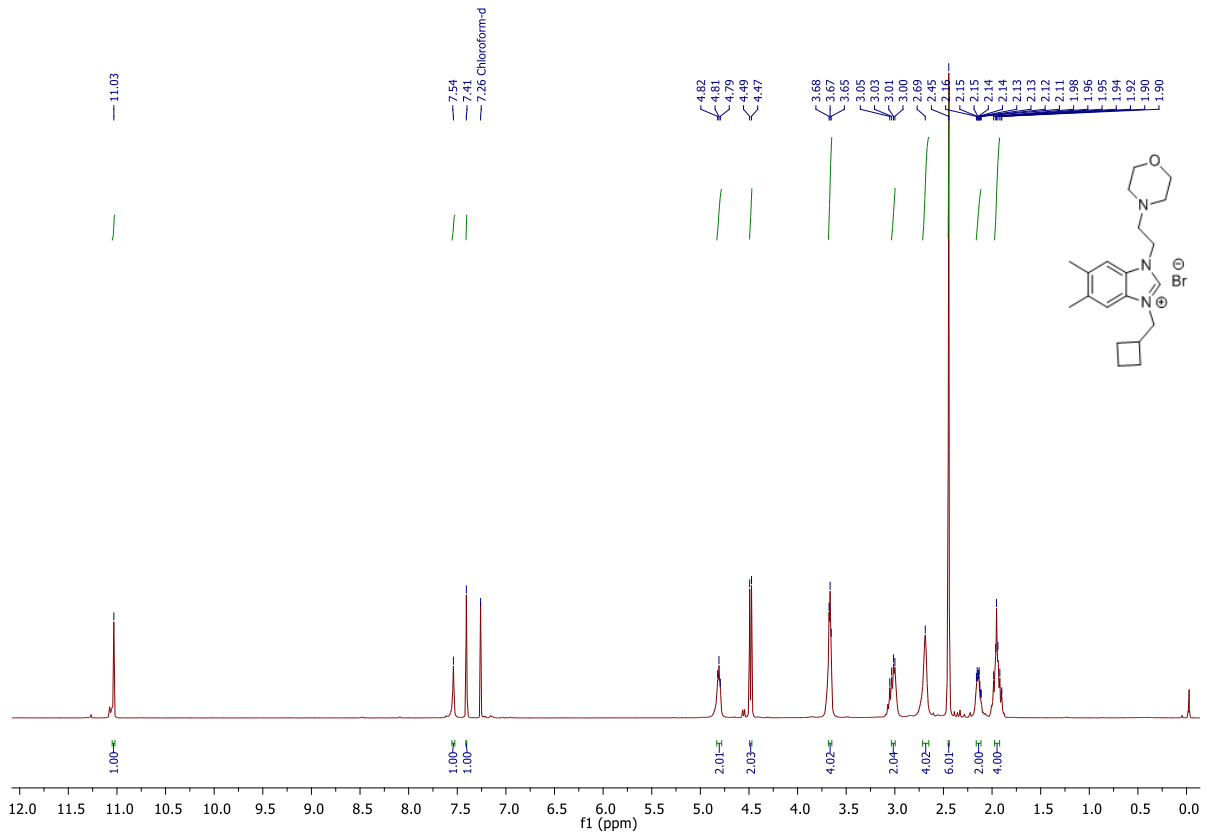

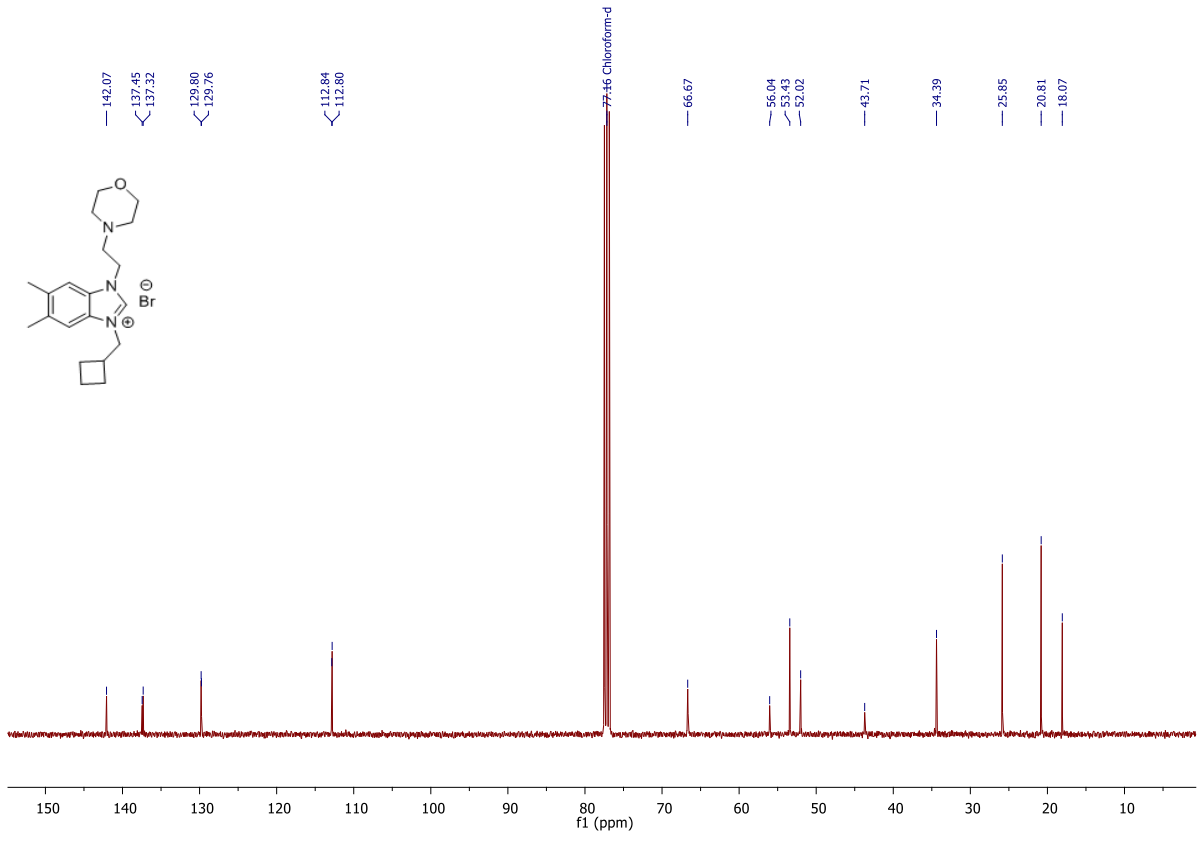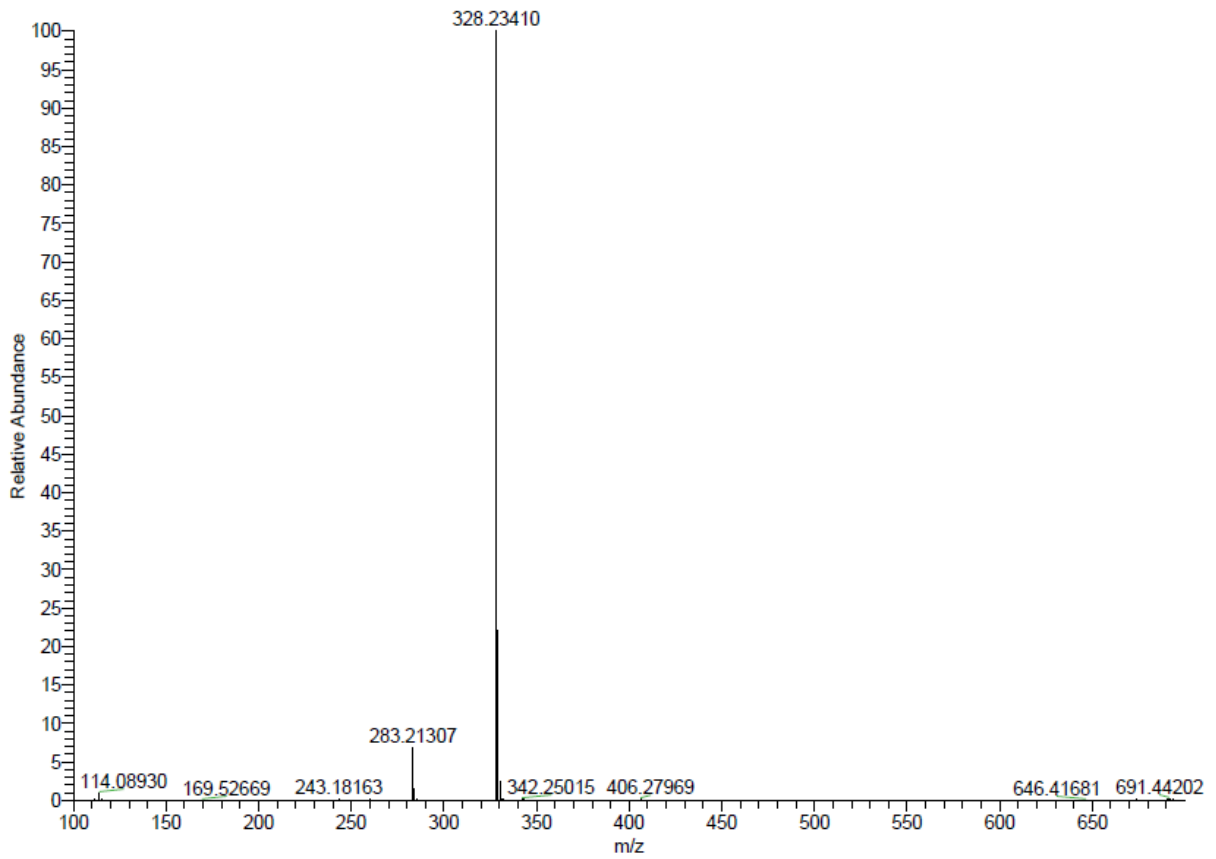

2d



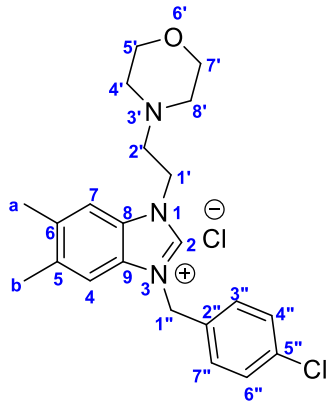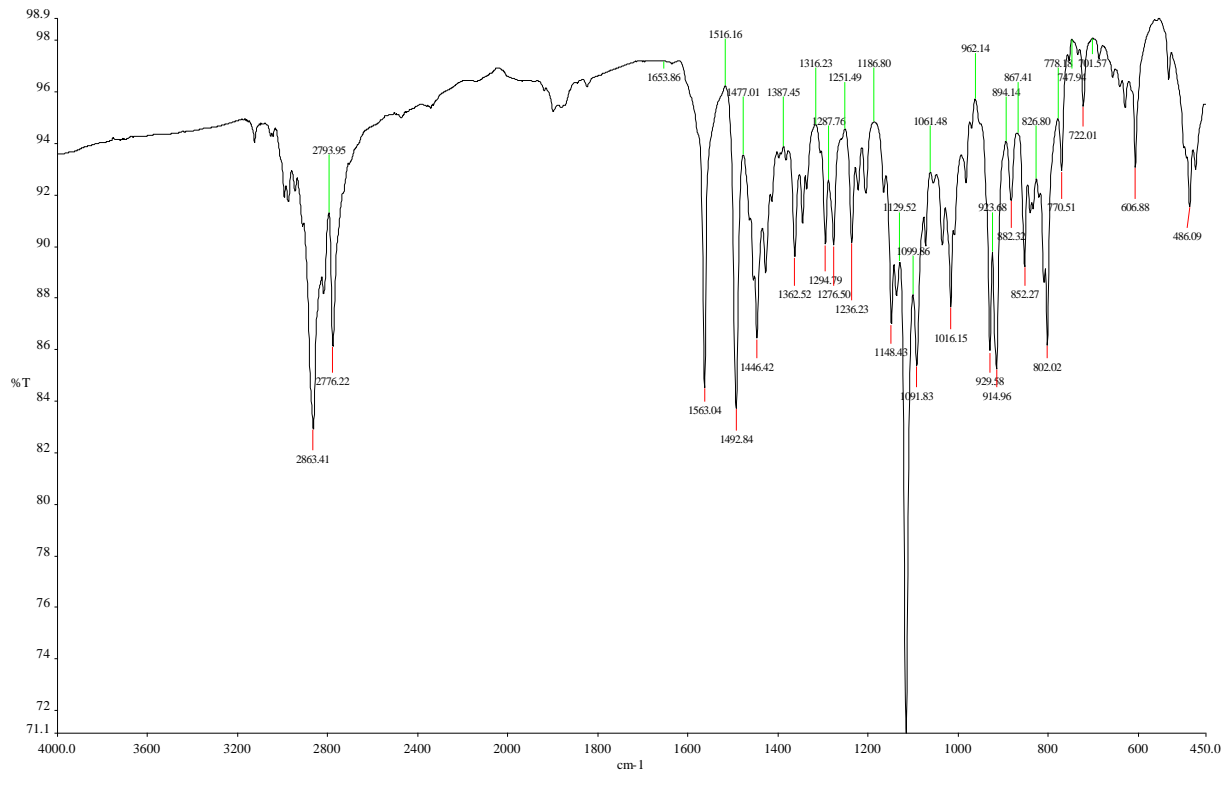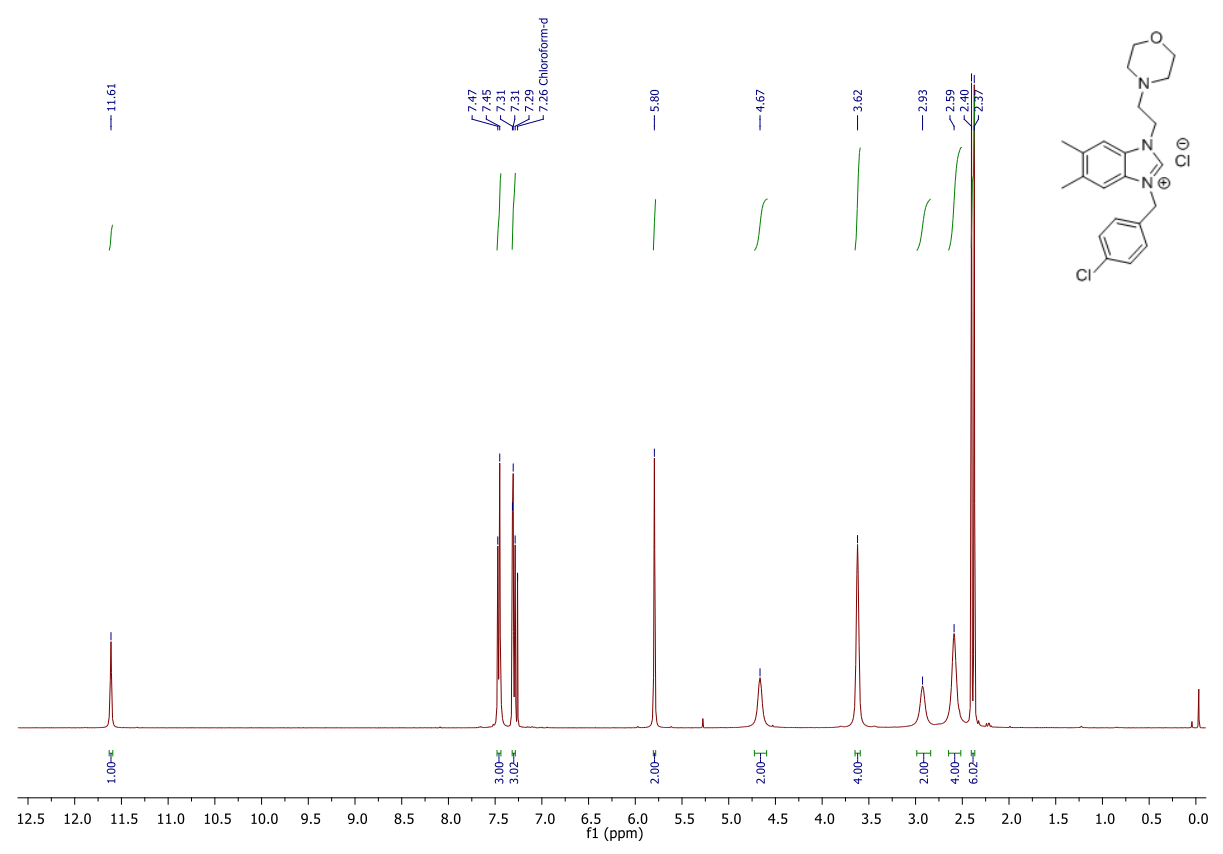

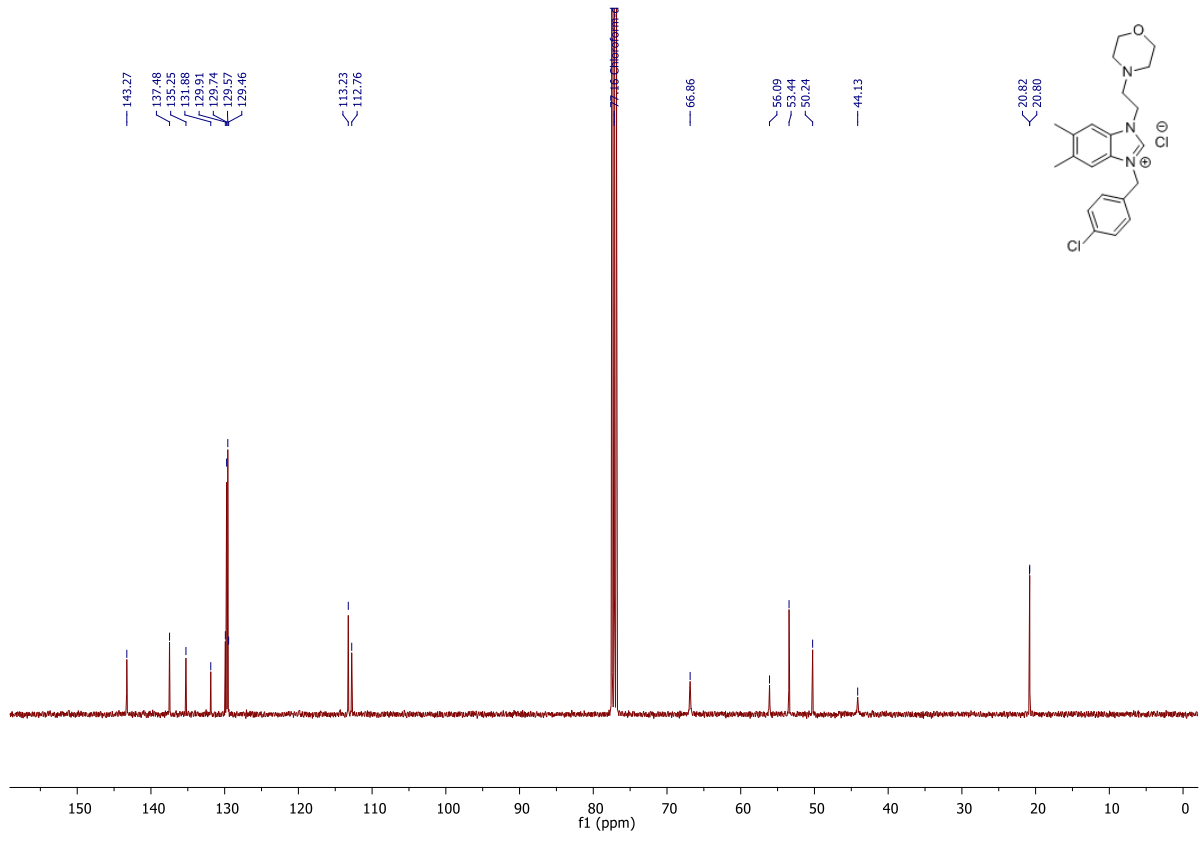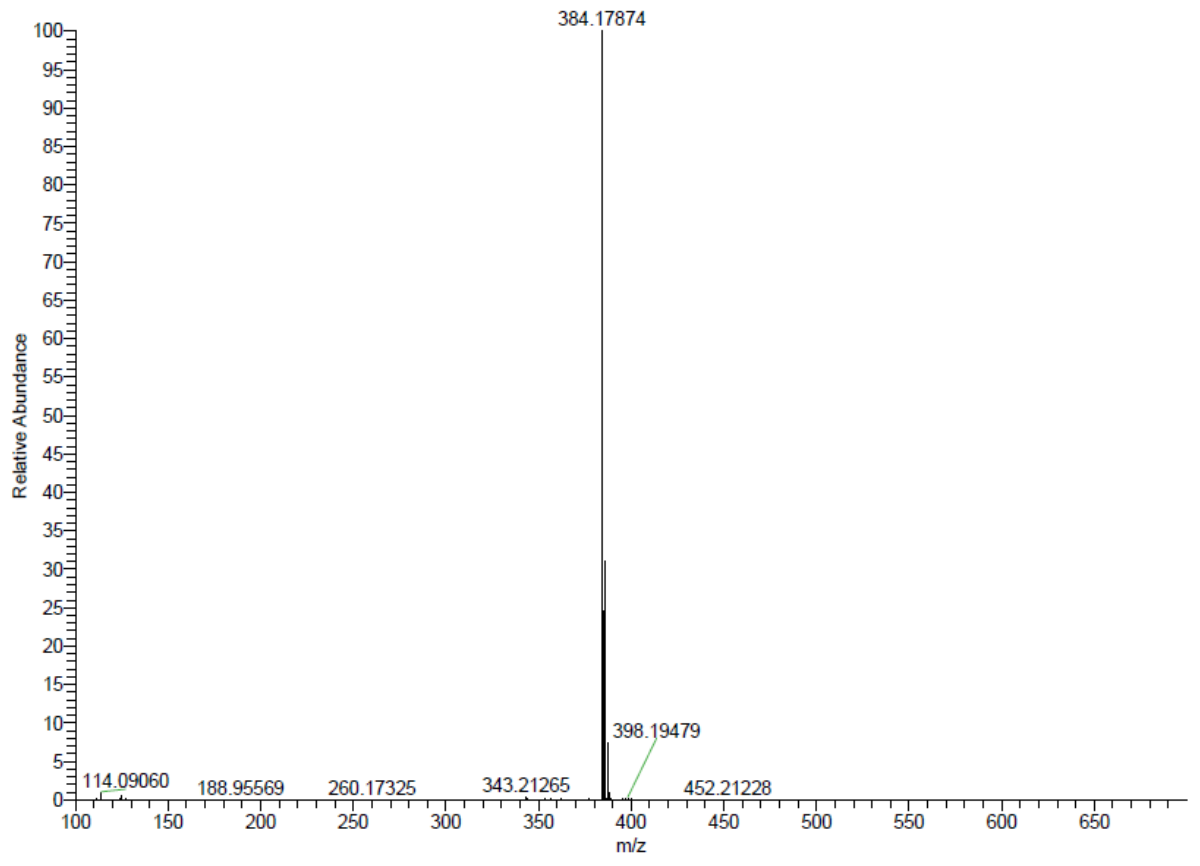

2e

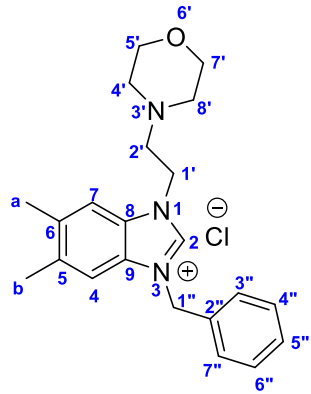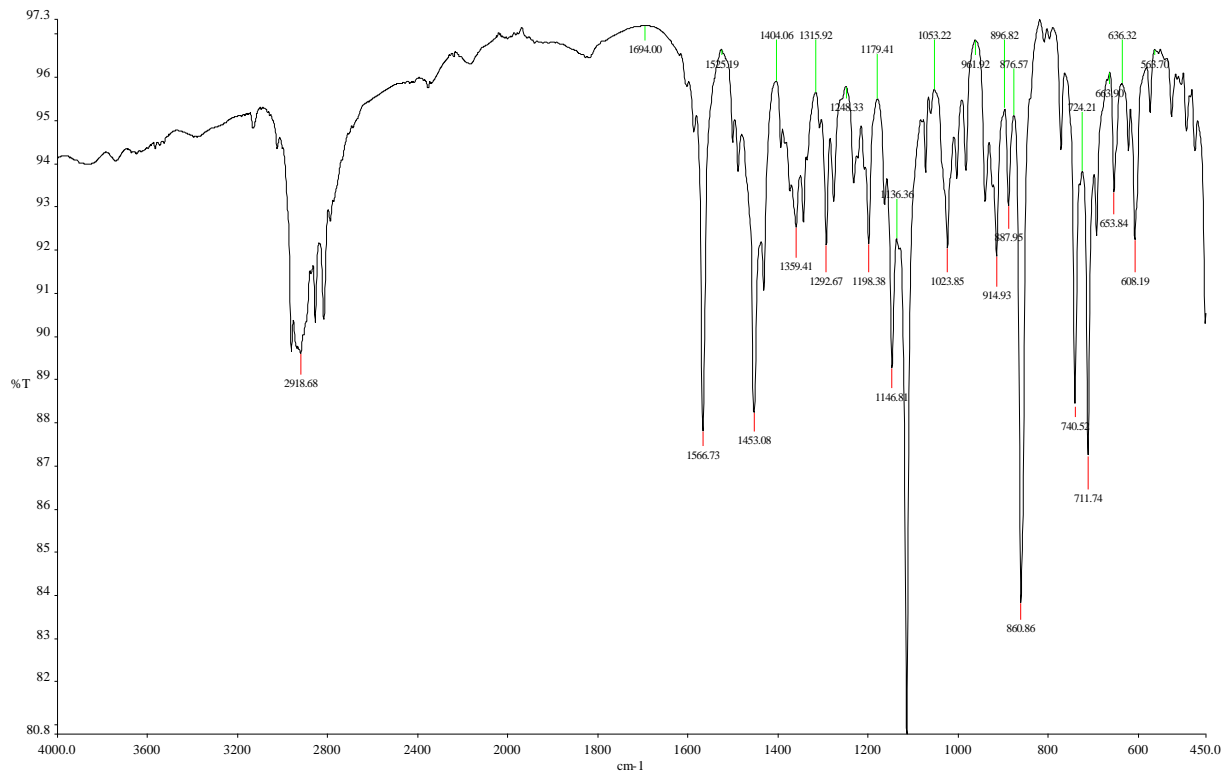

db-19

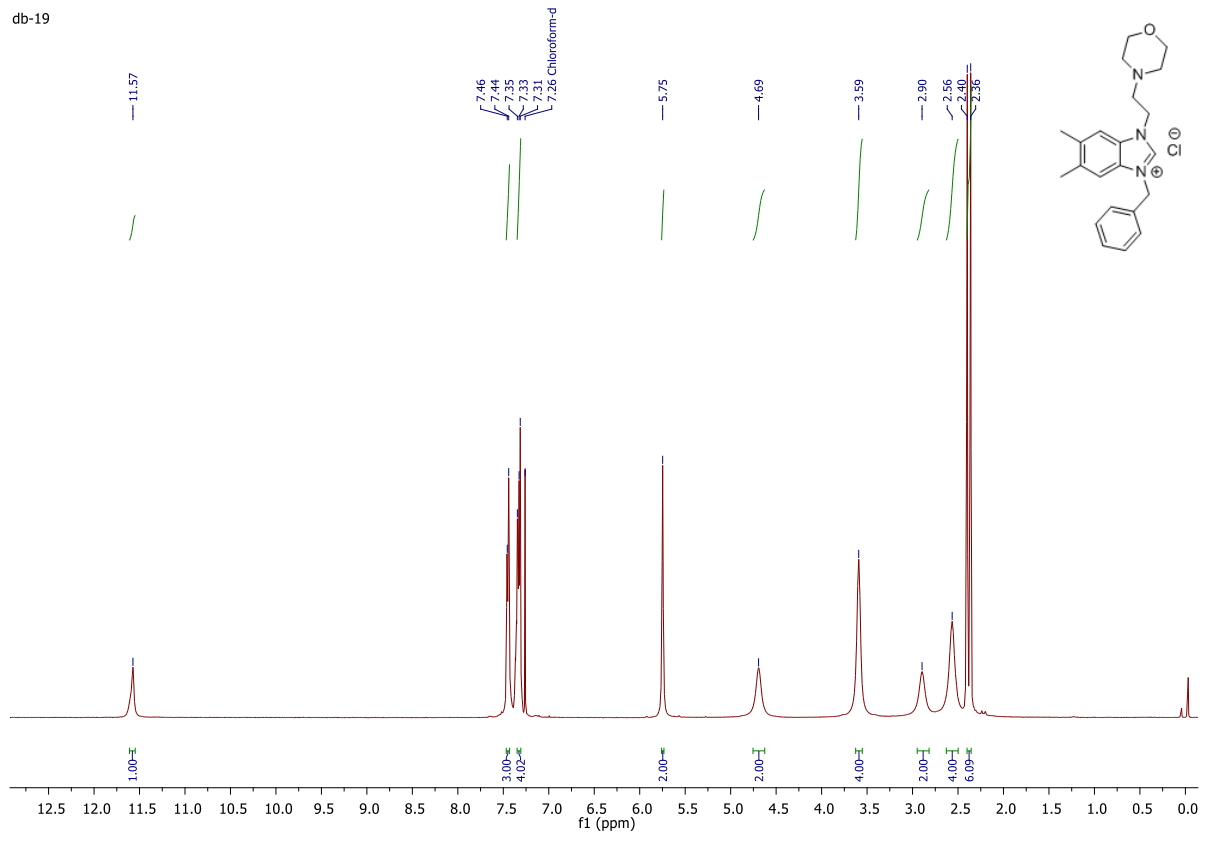

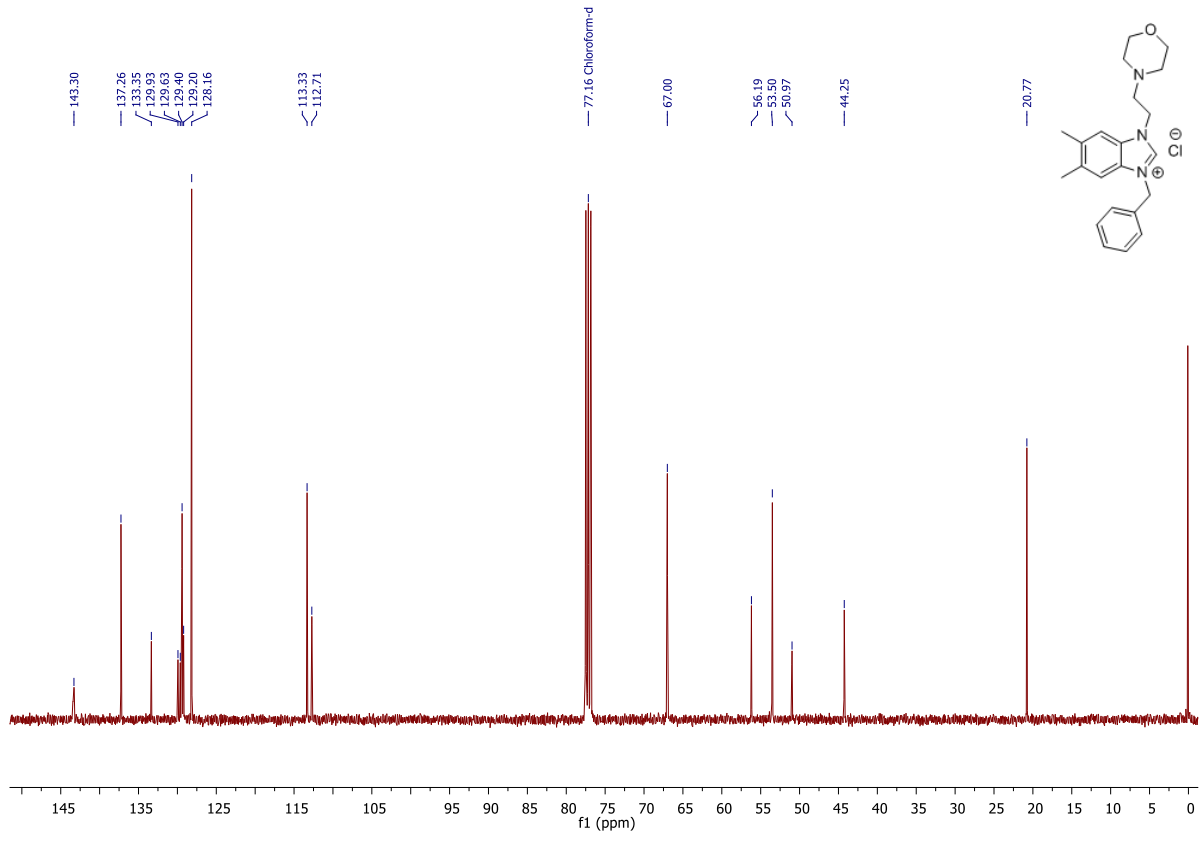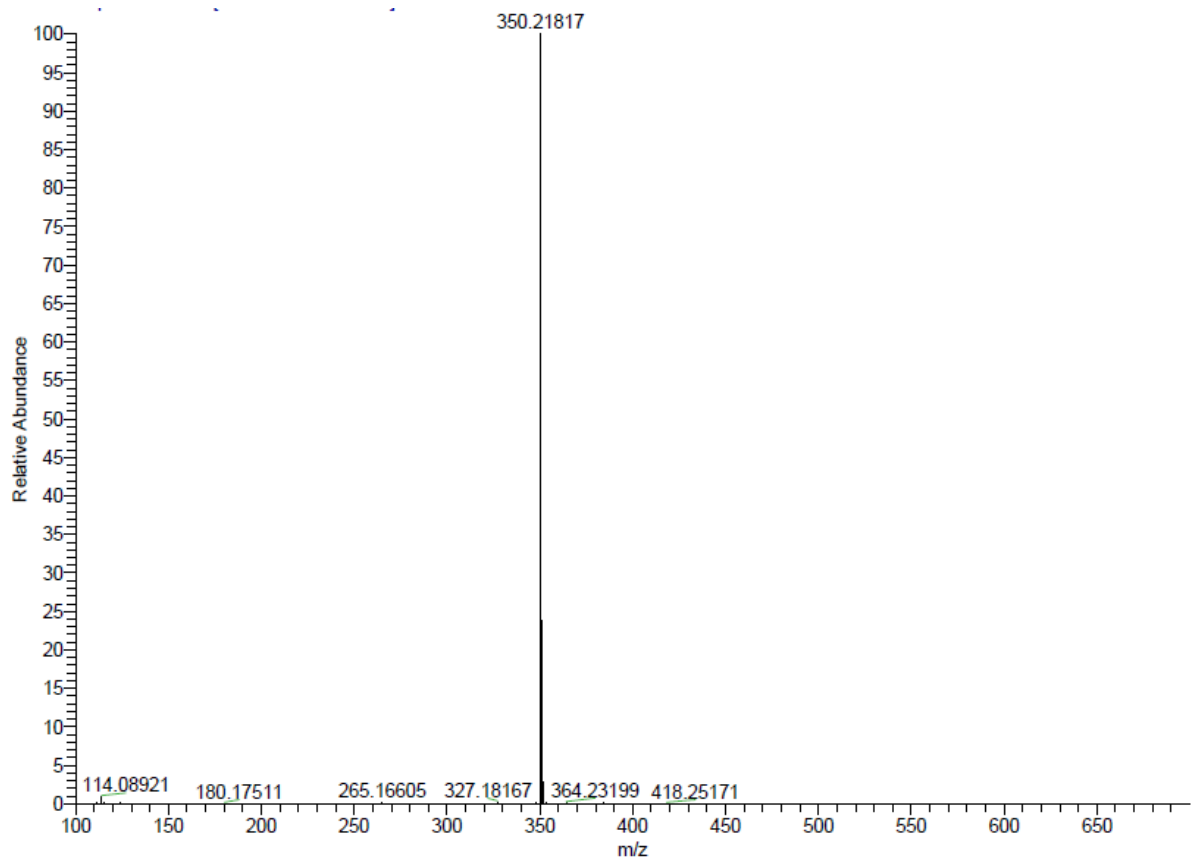

2f

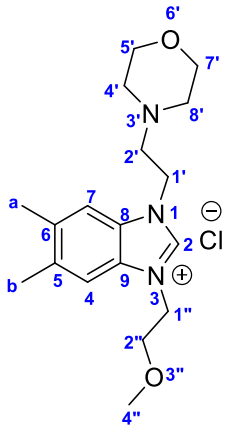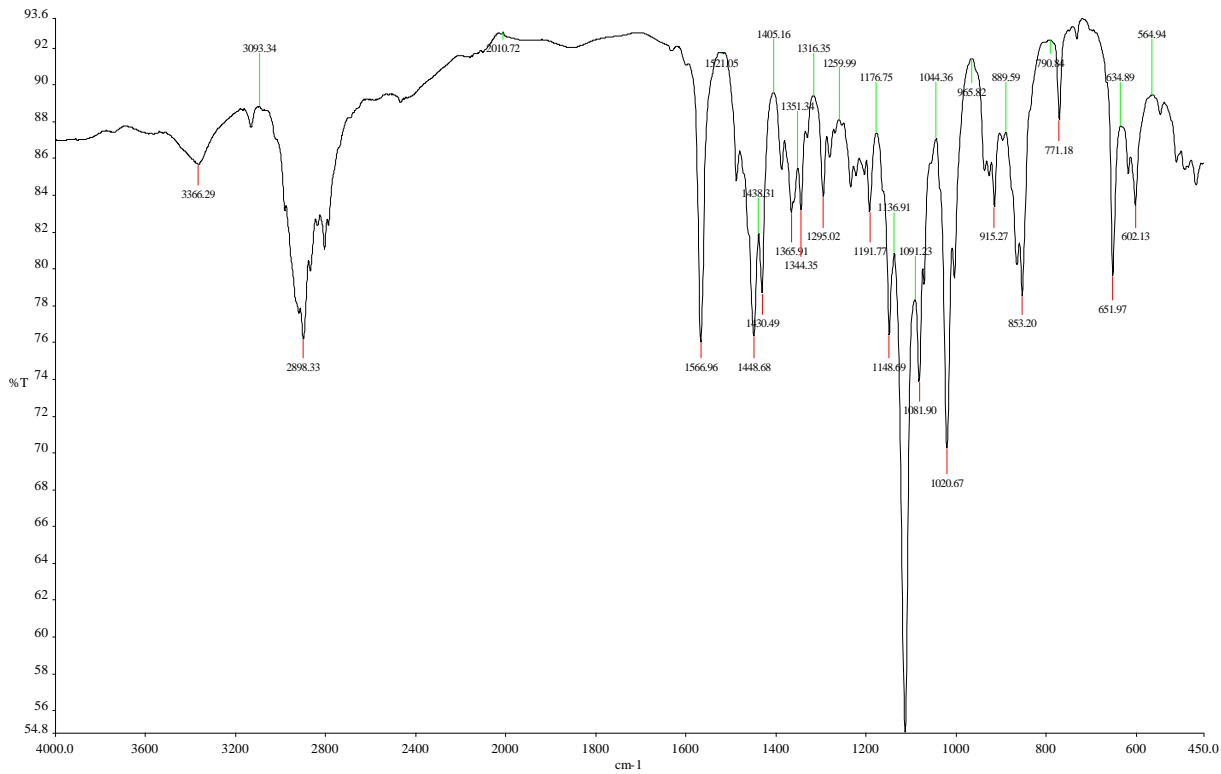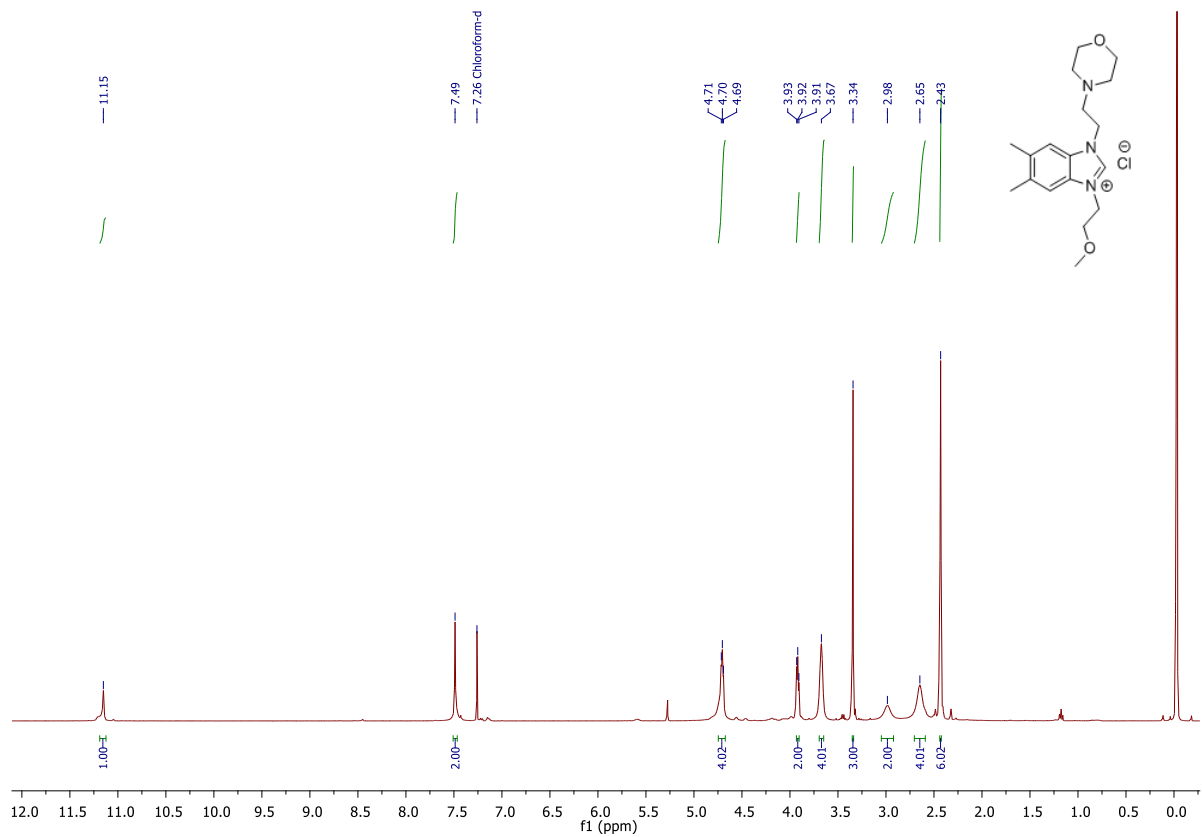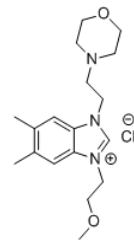

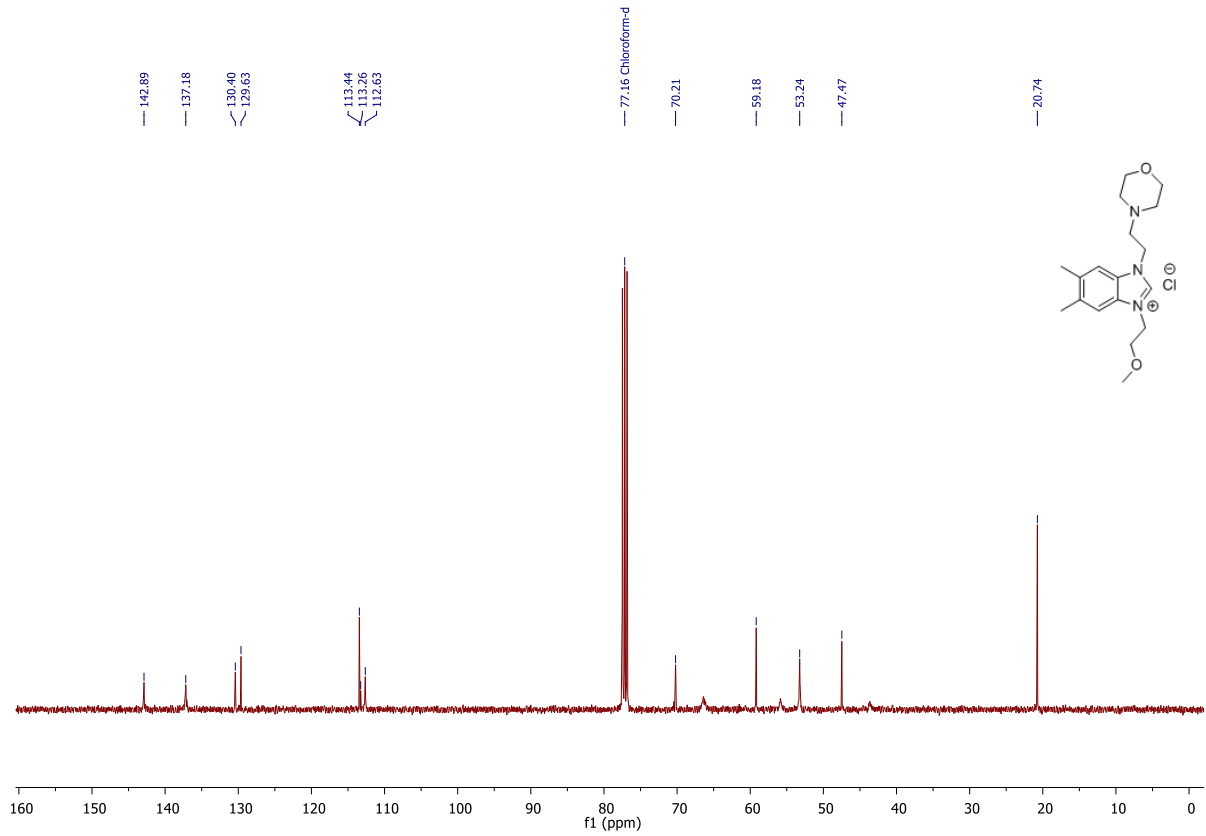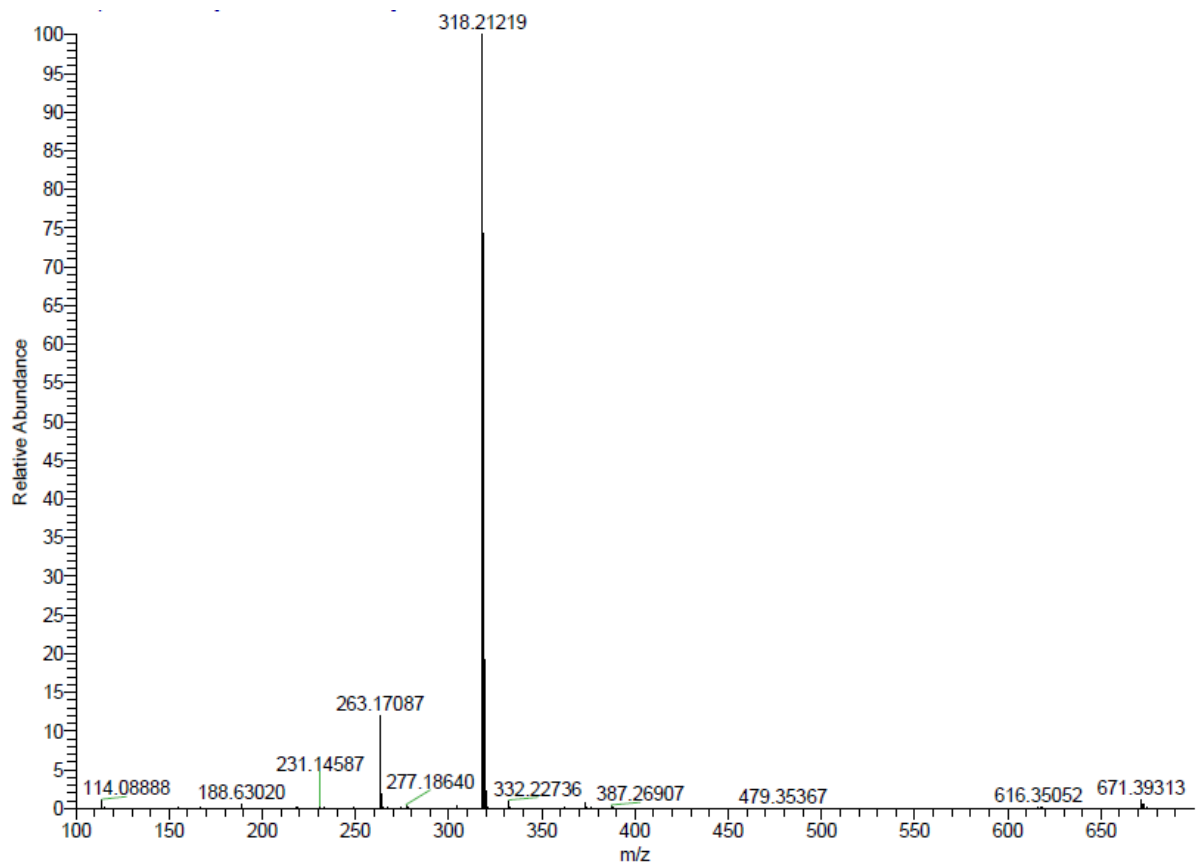

2g

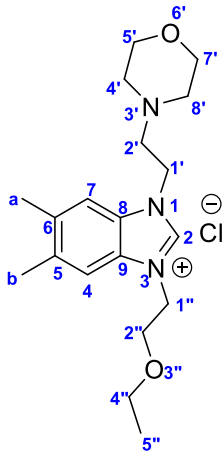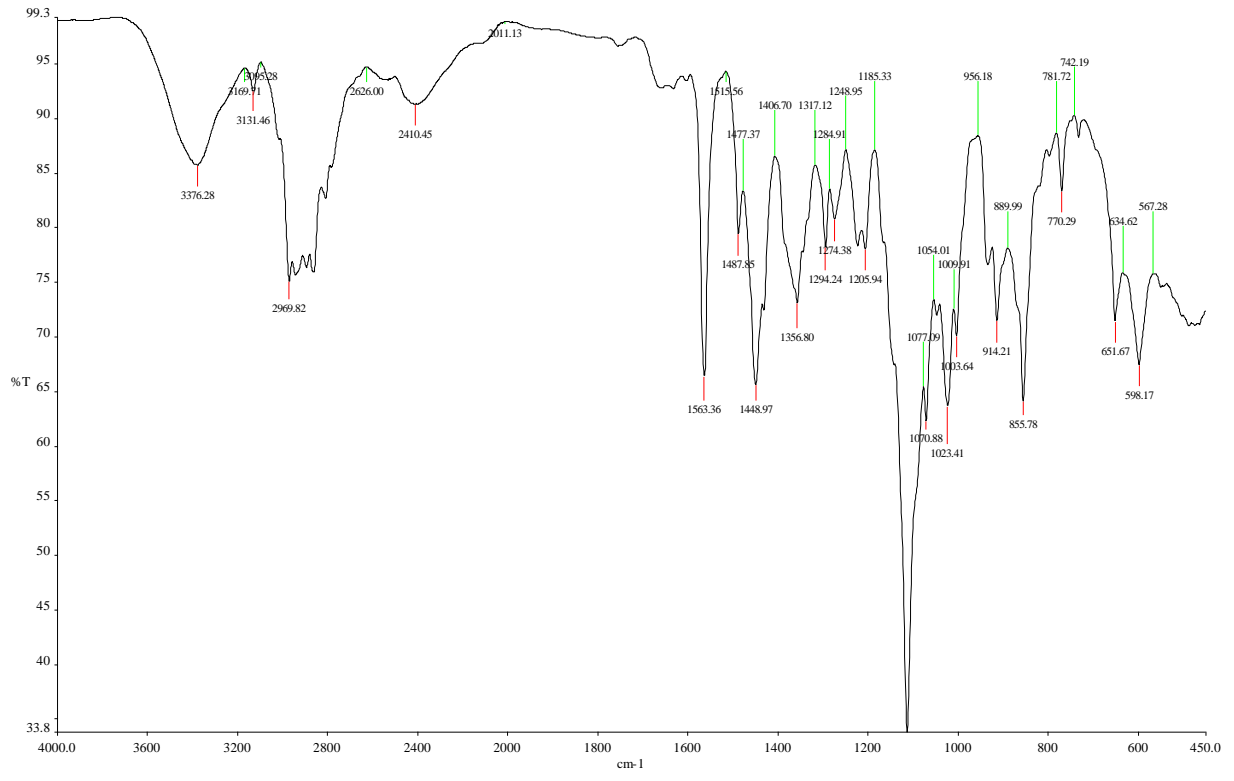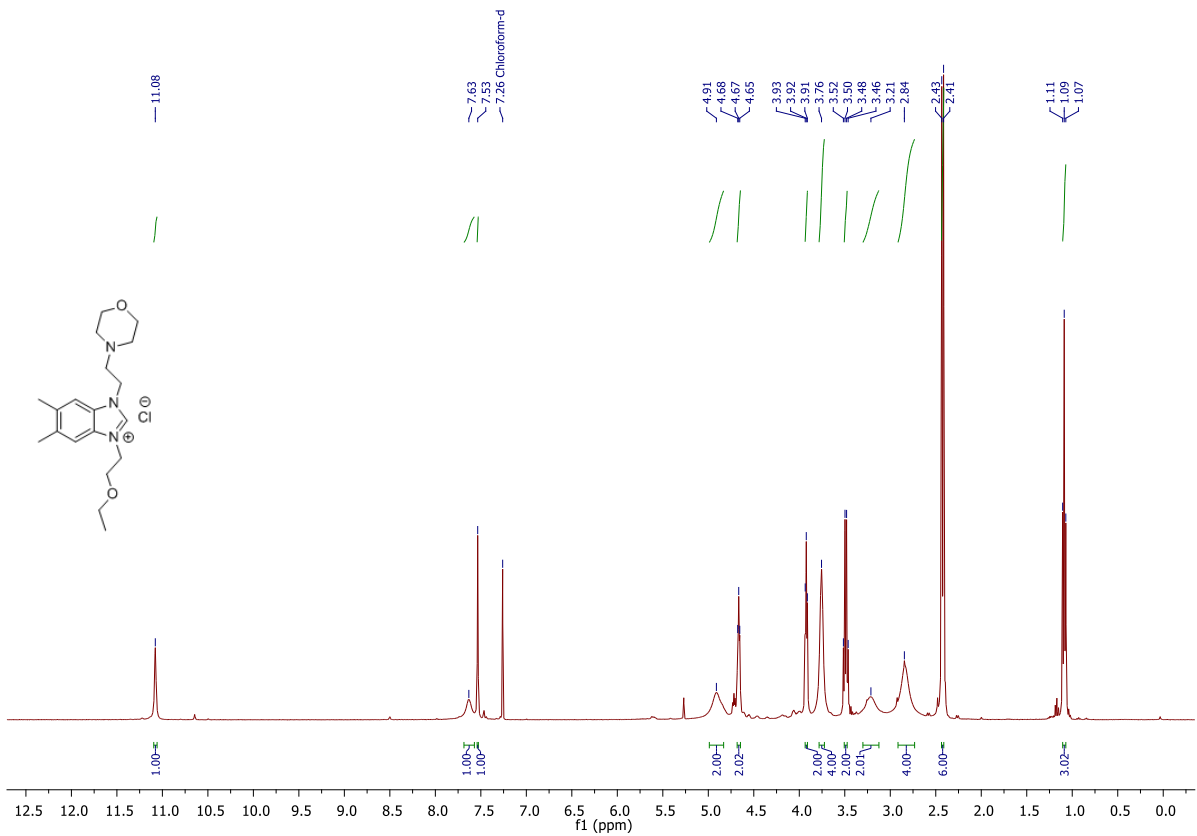

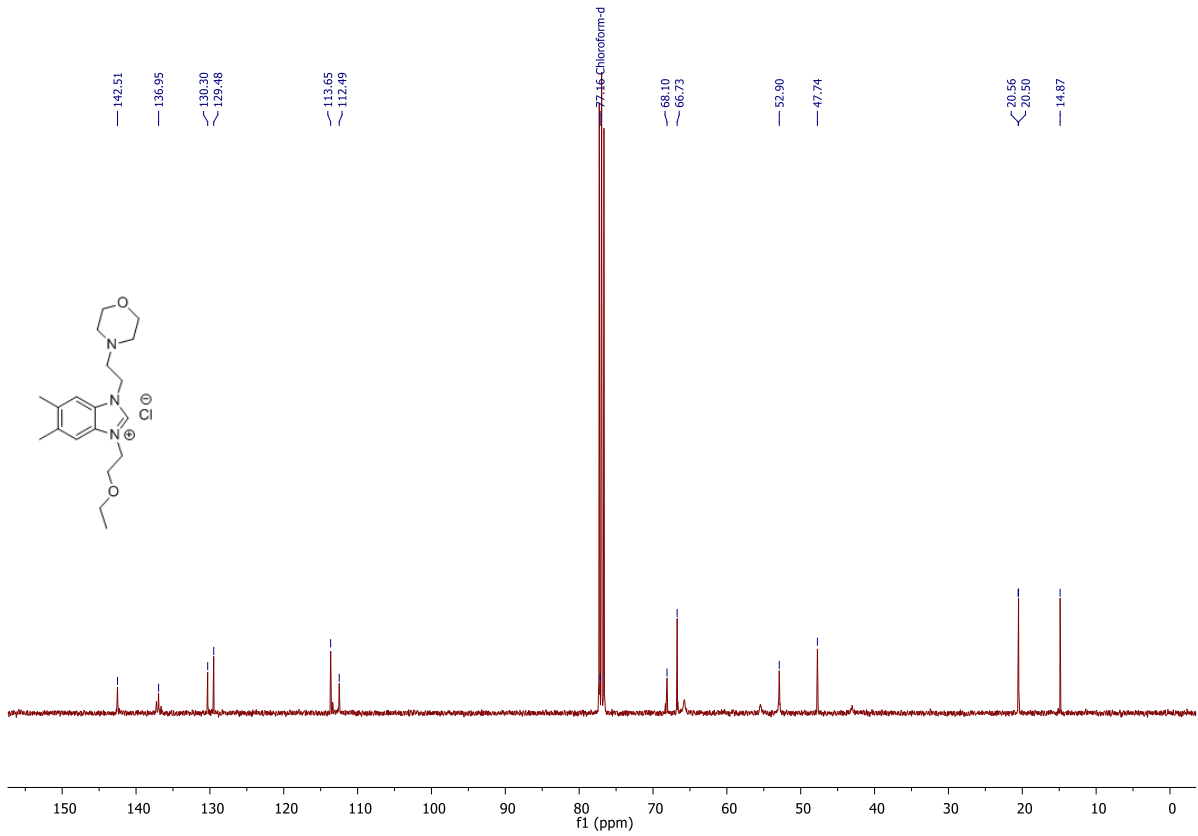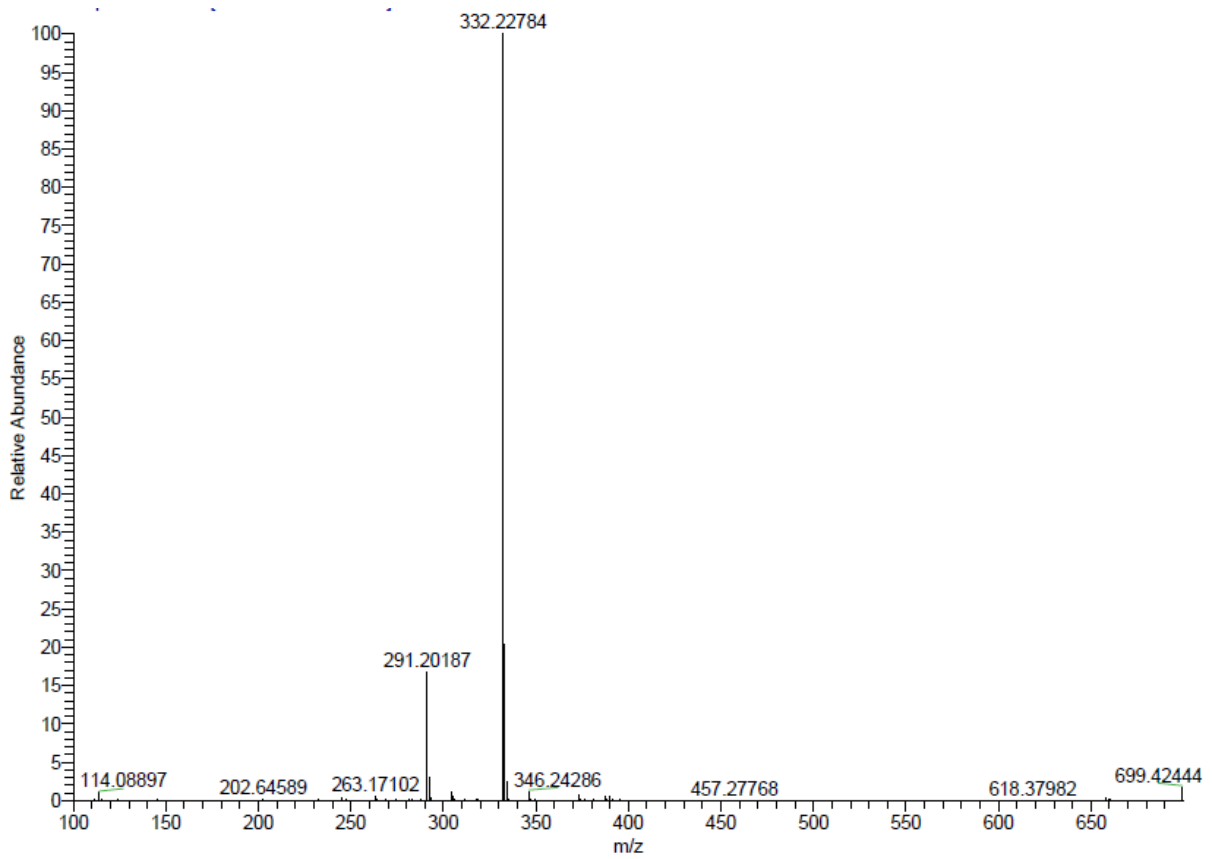

2h



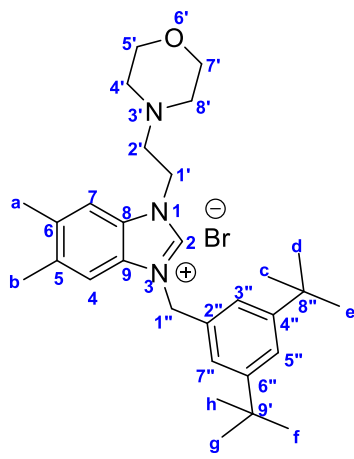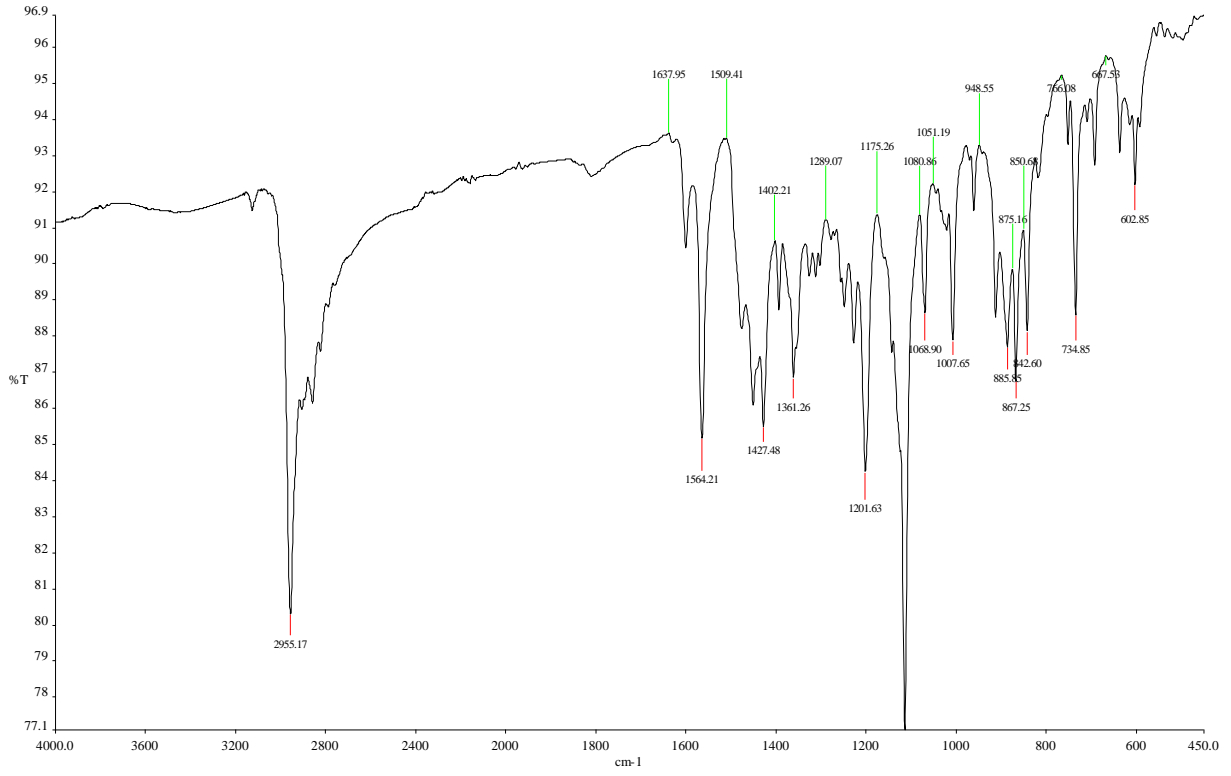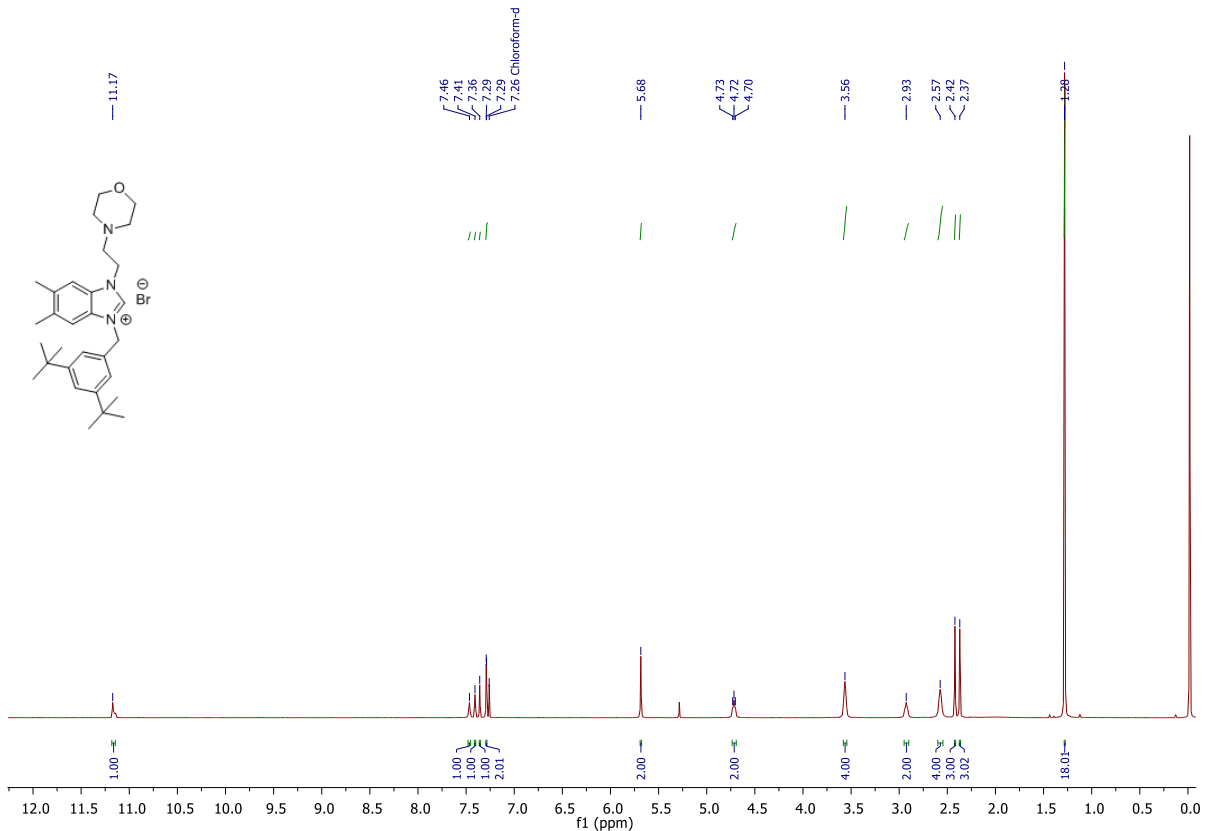

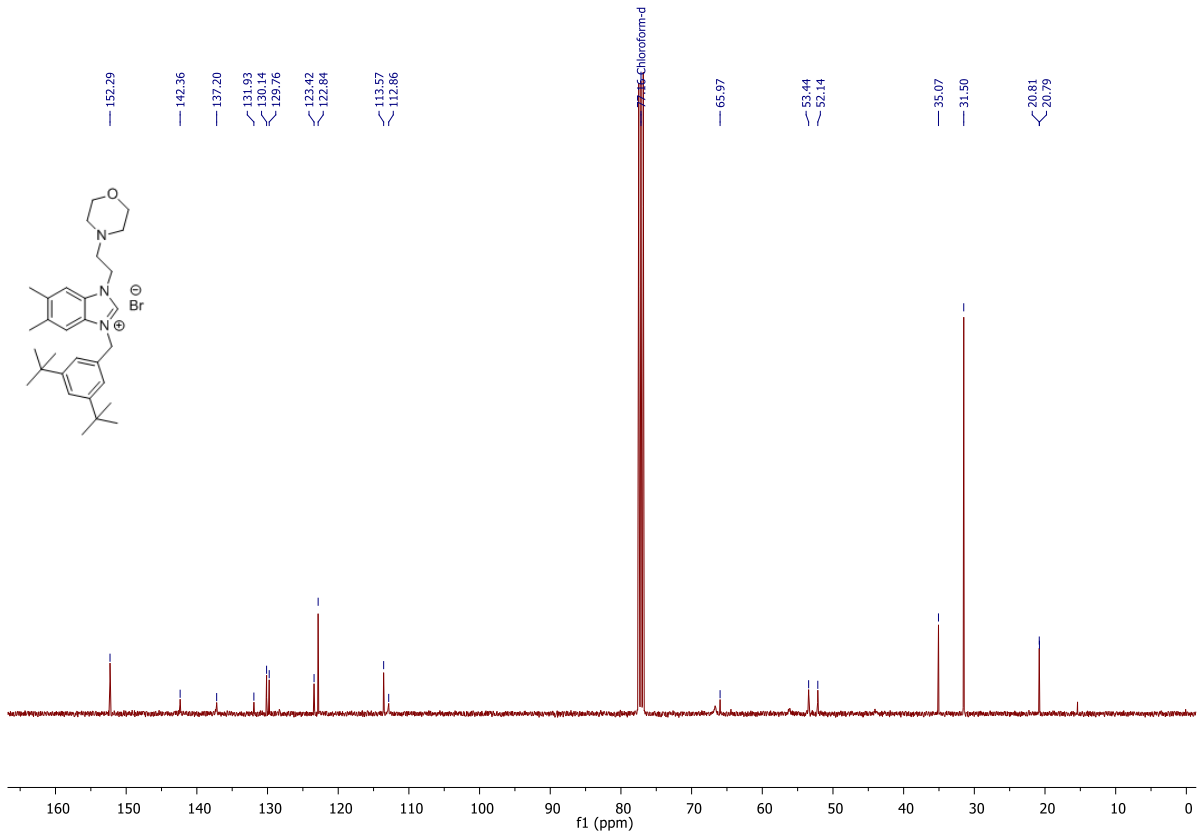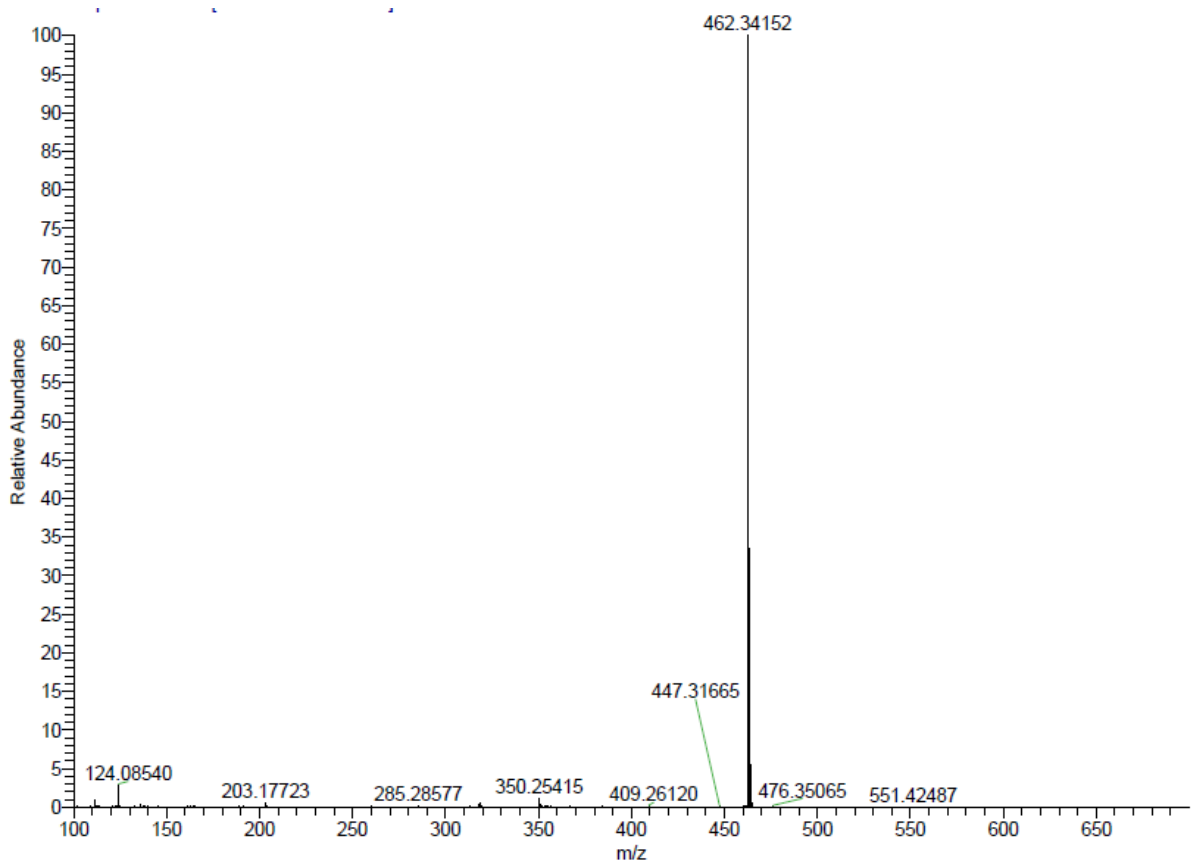

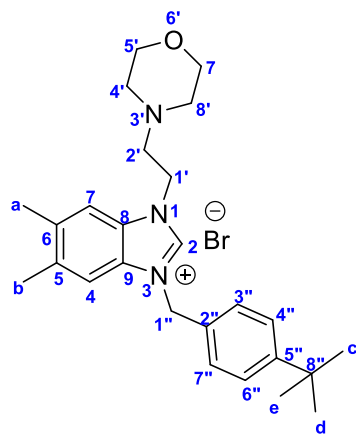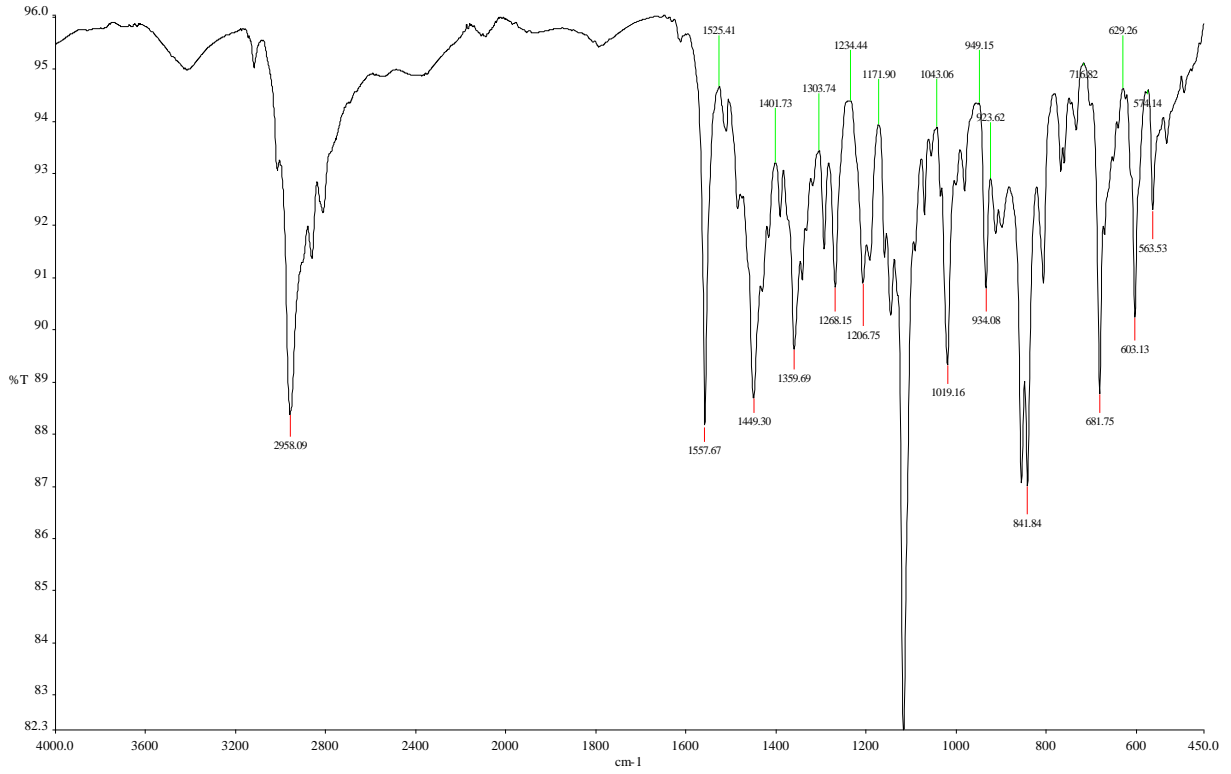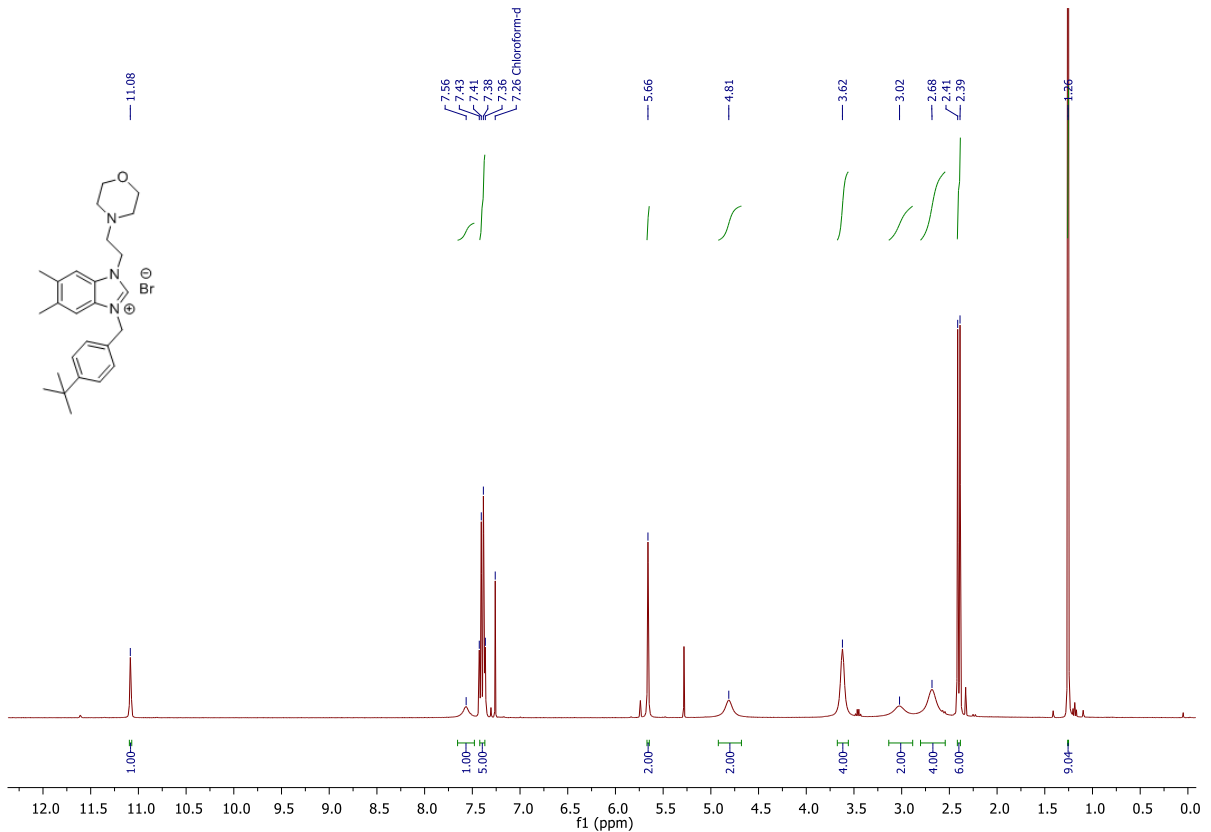

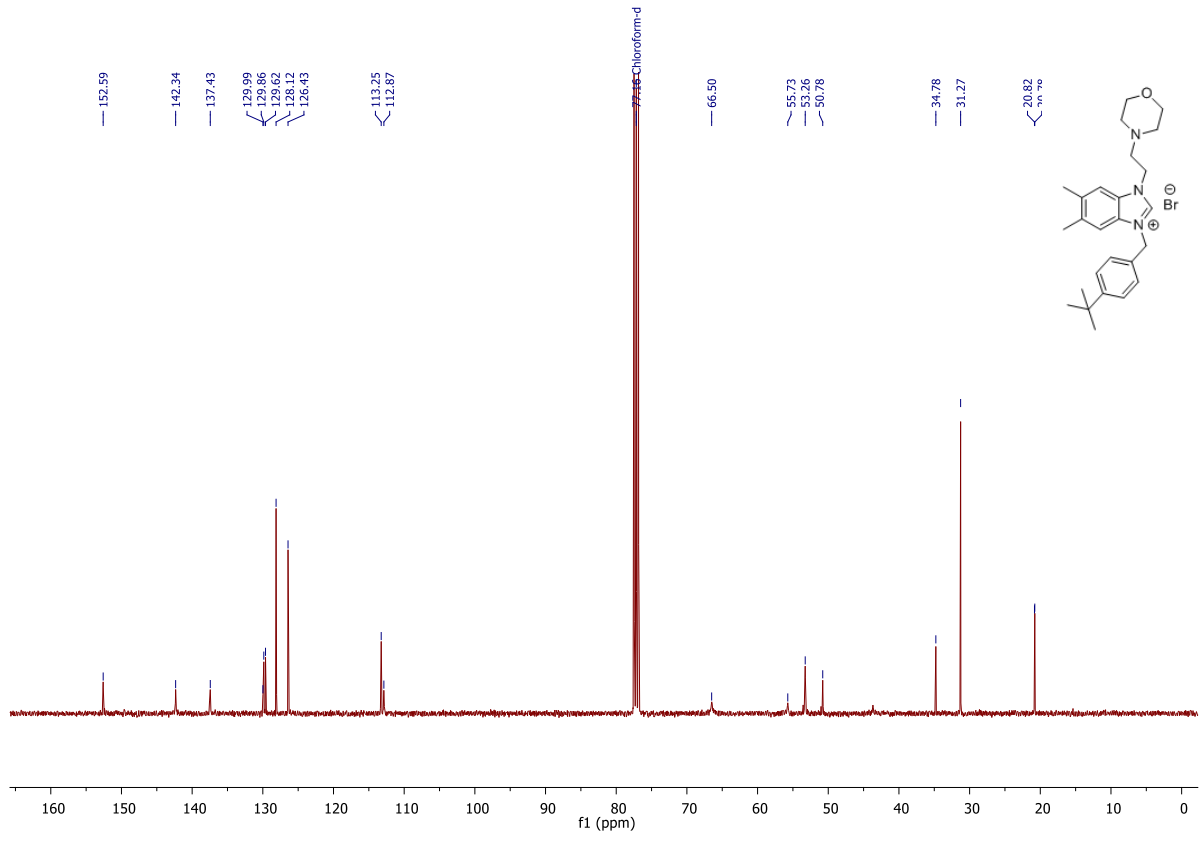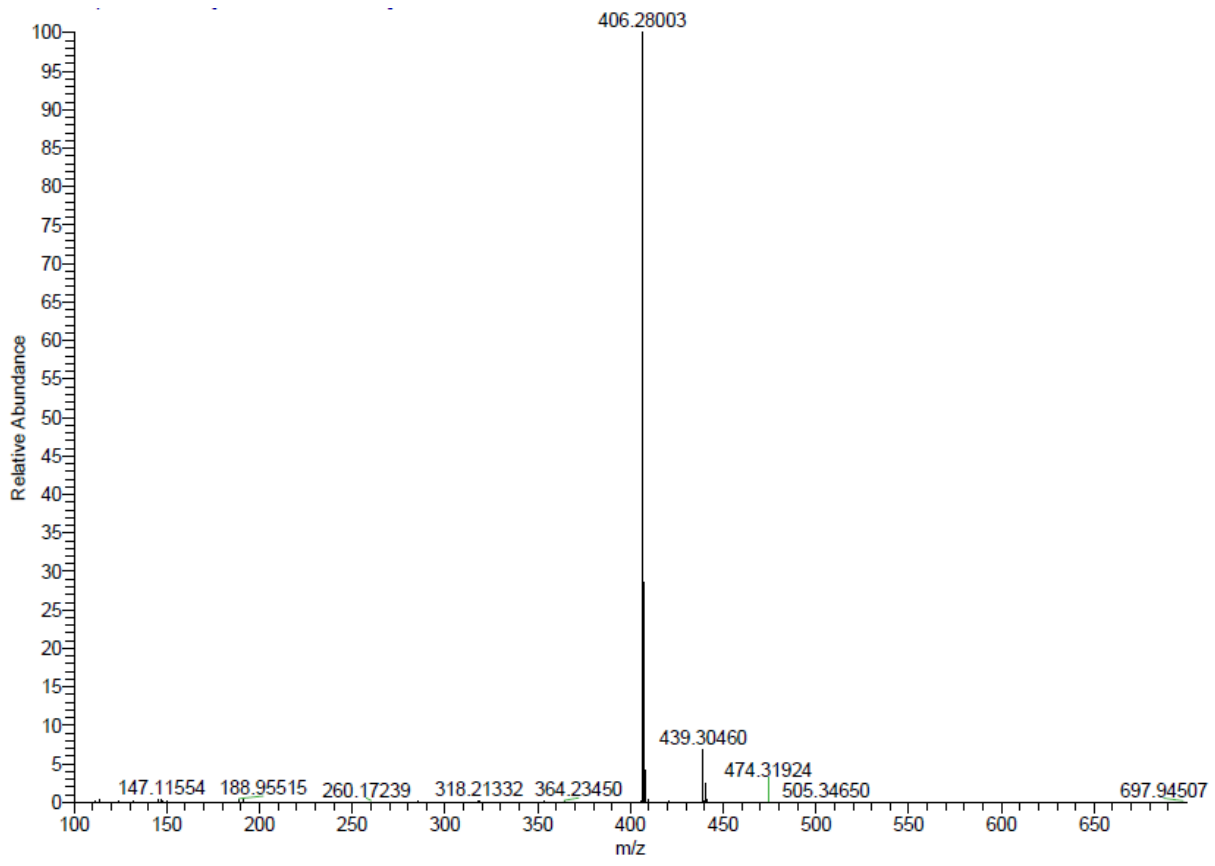

3a

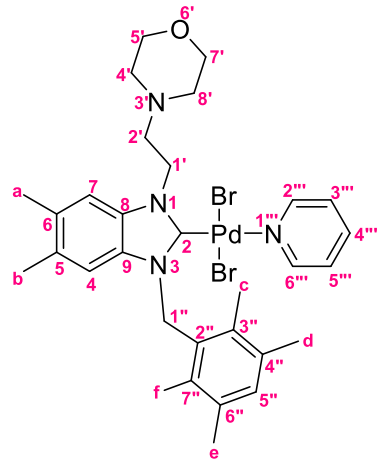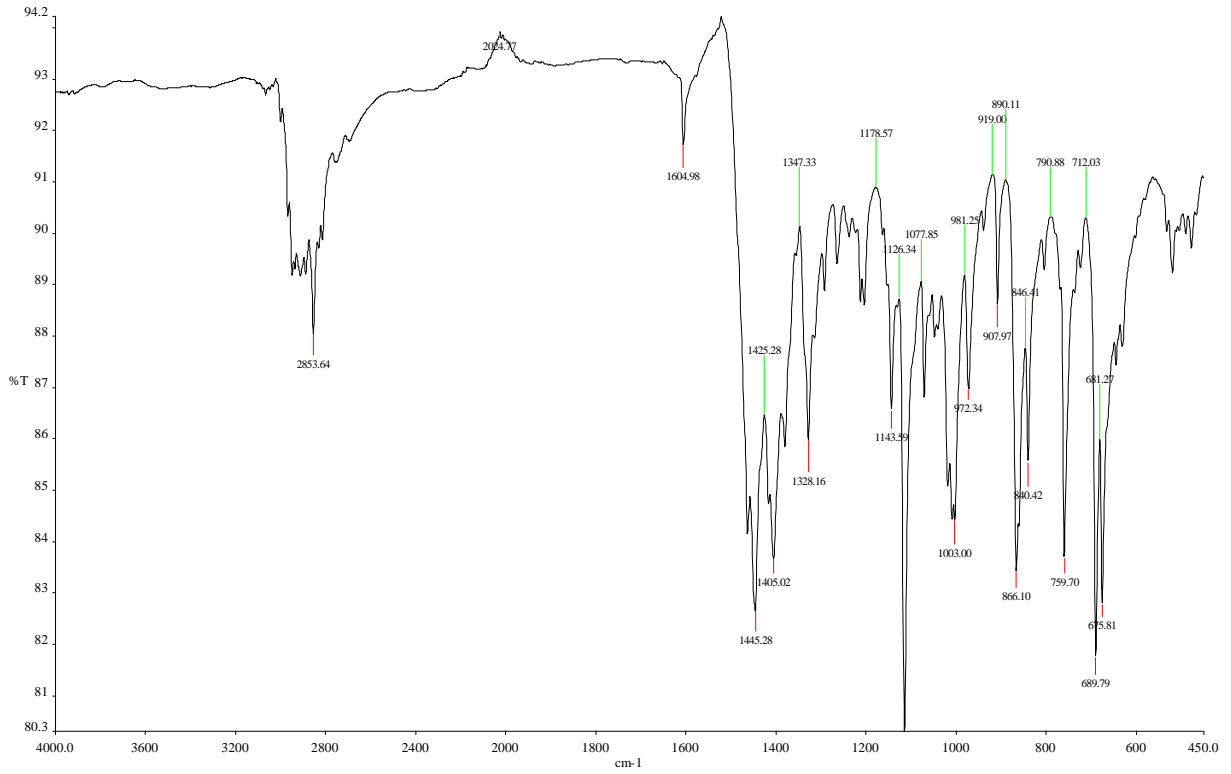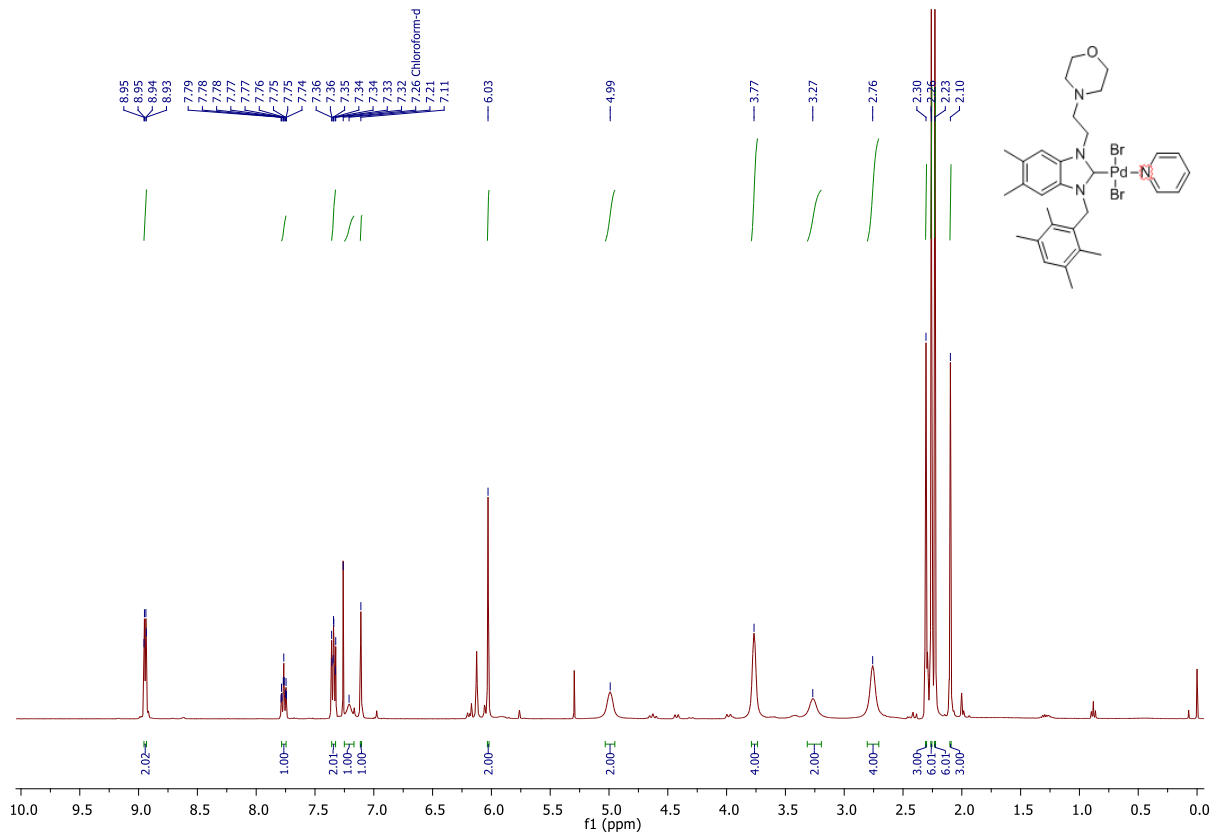

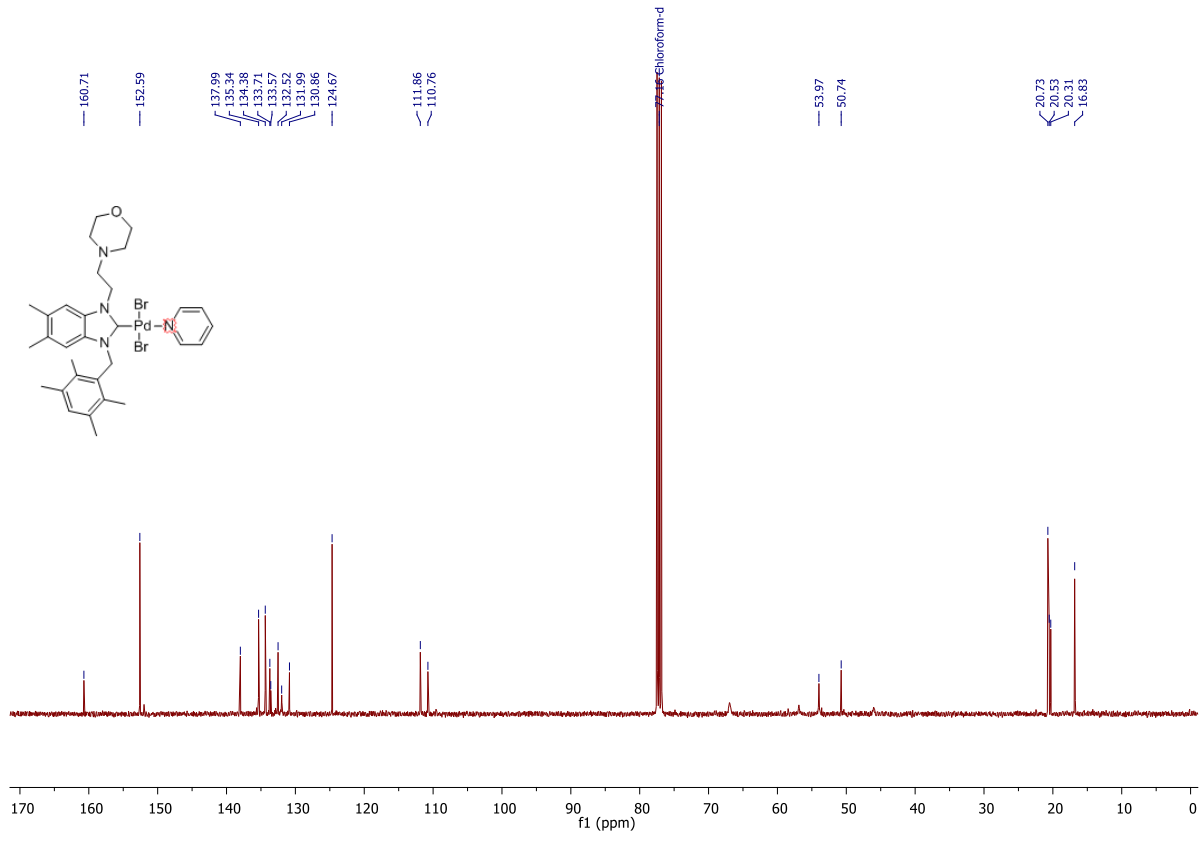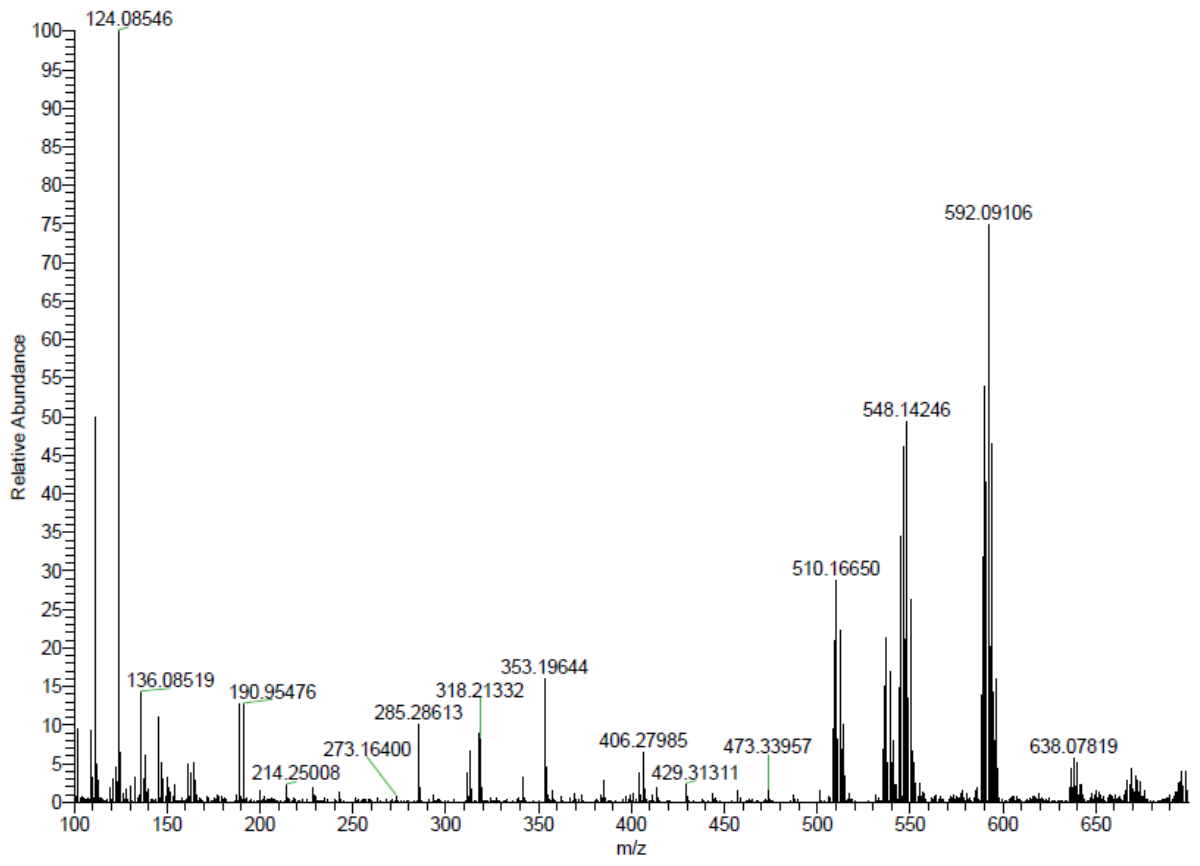

3b

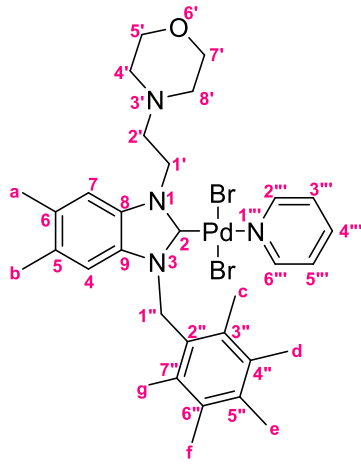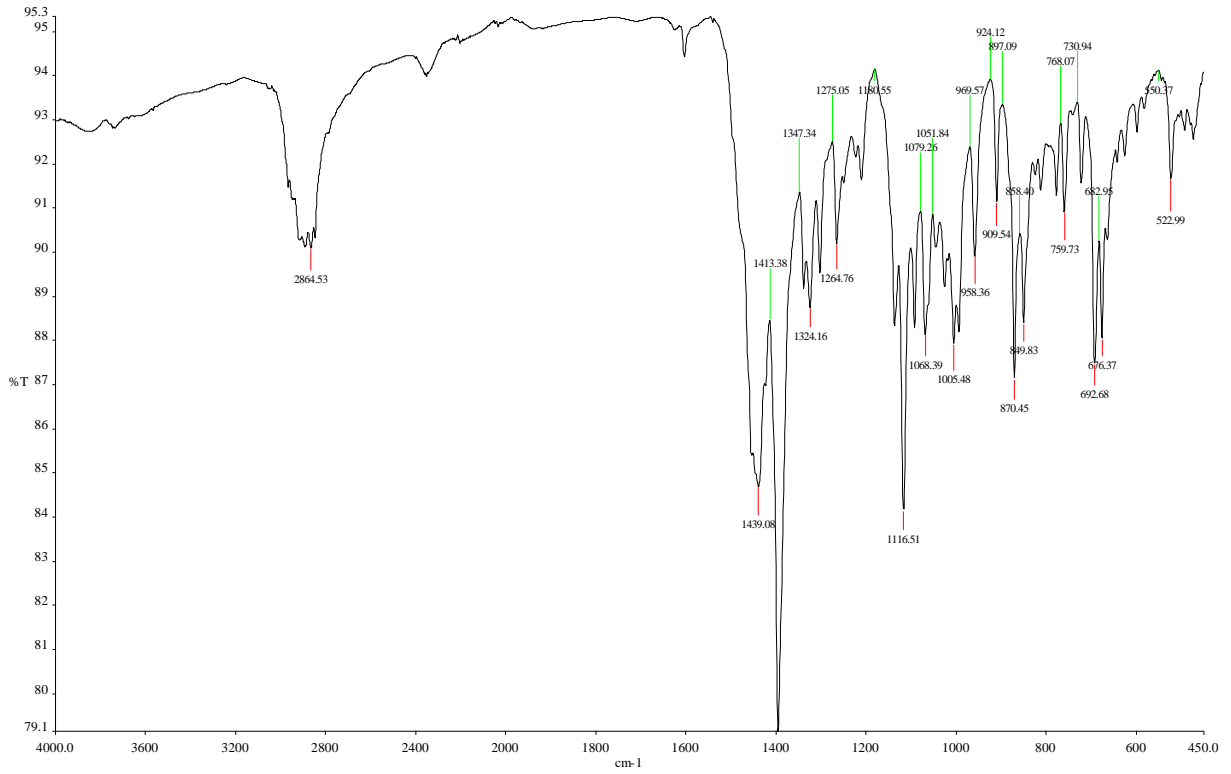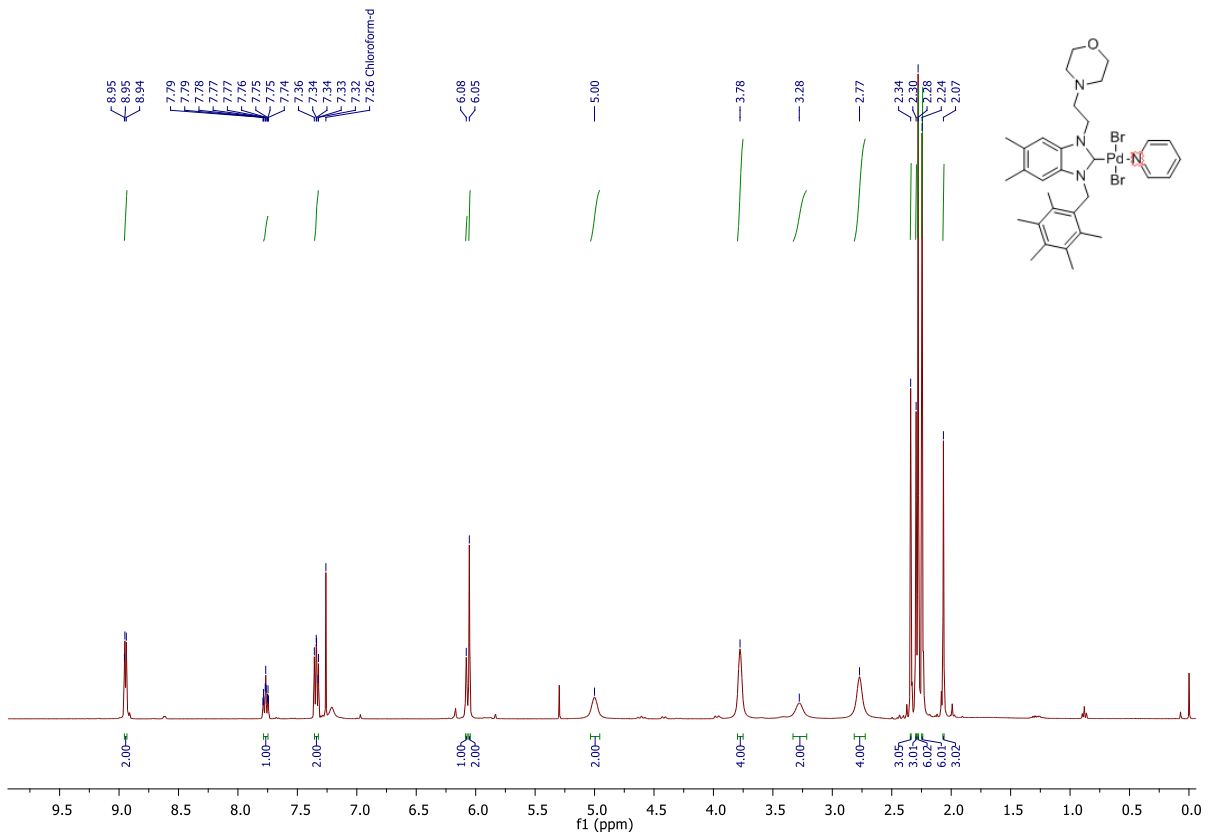

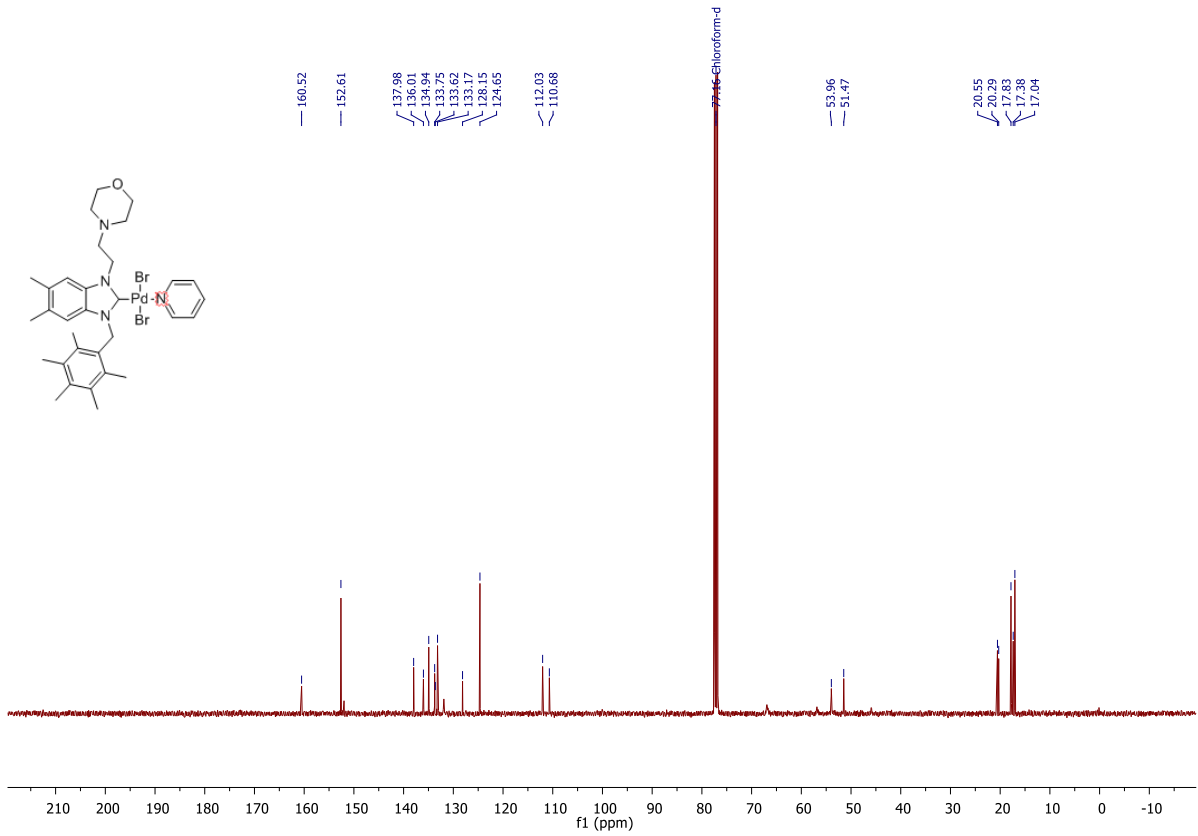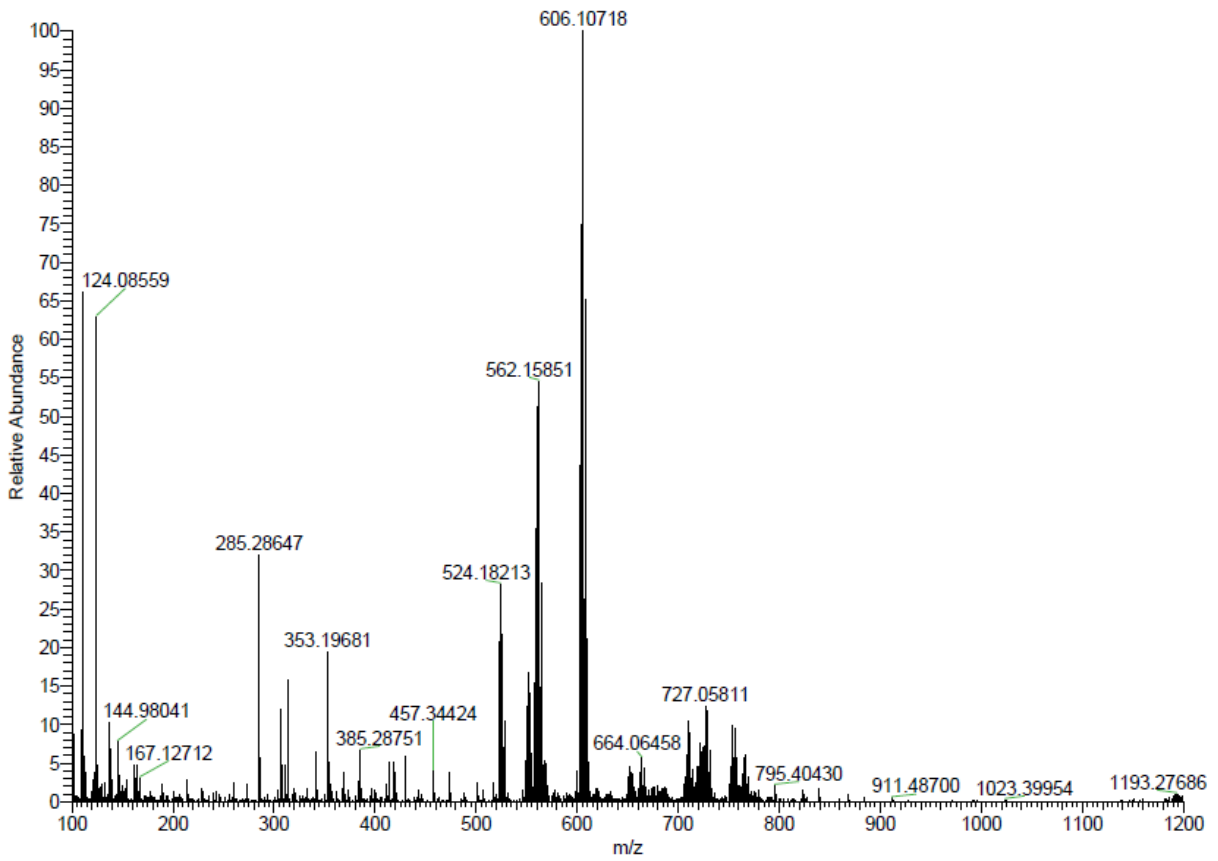

3c



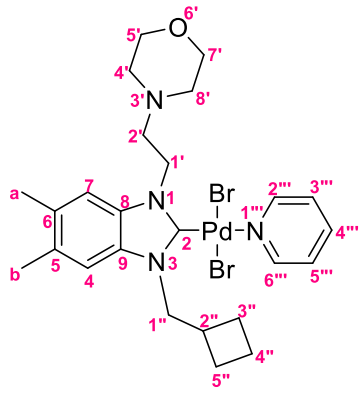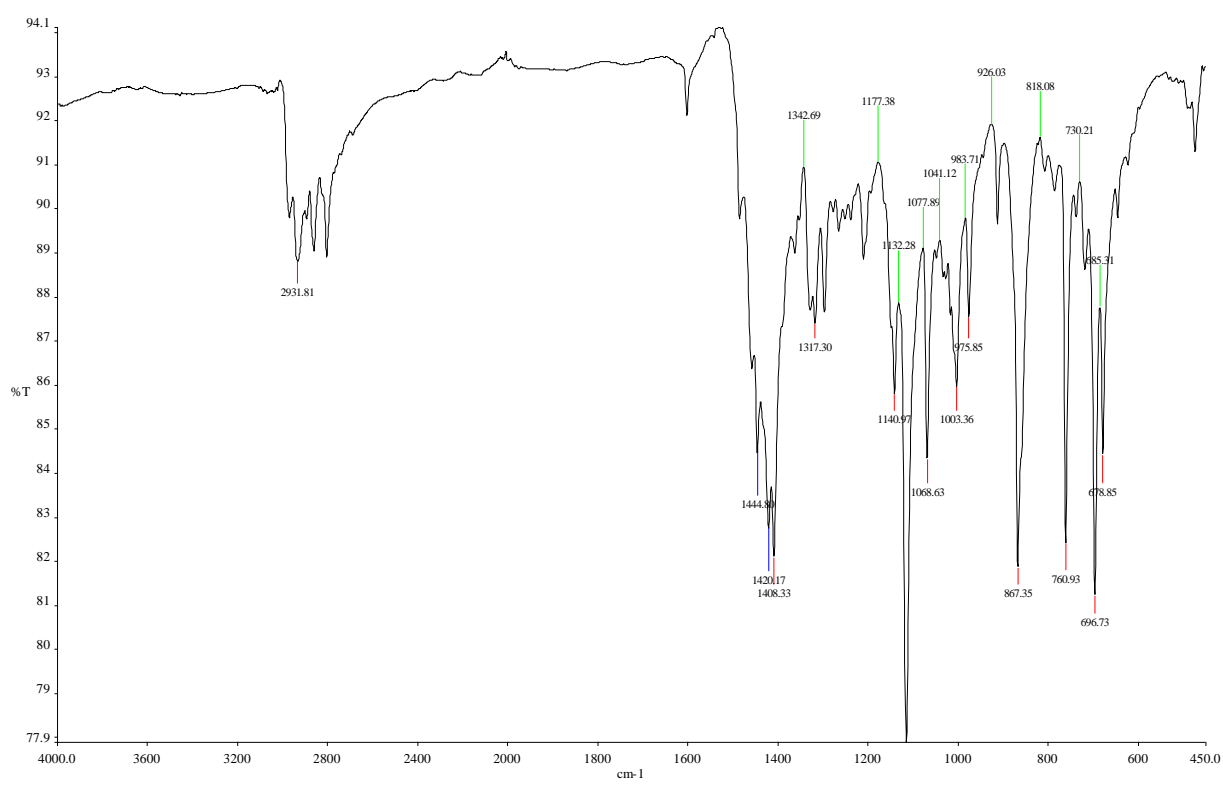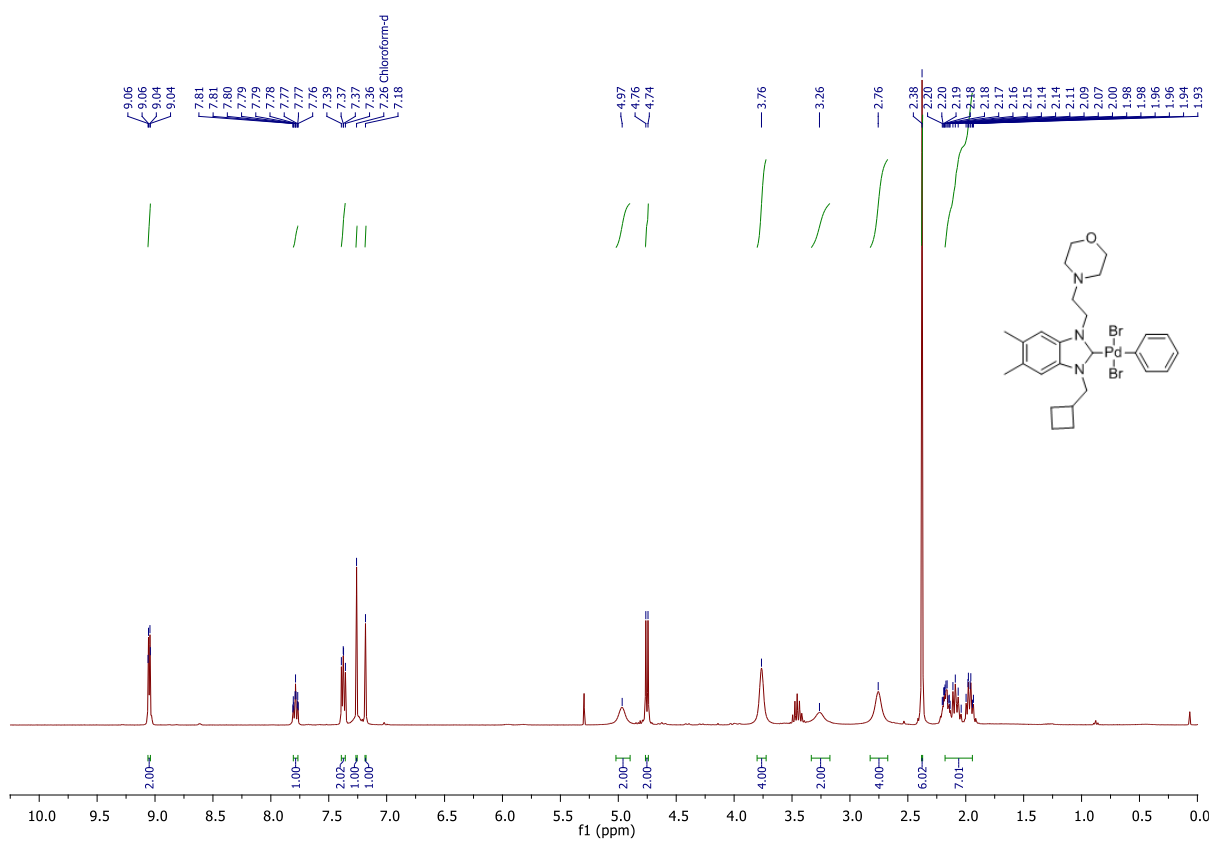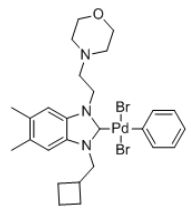

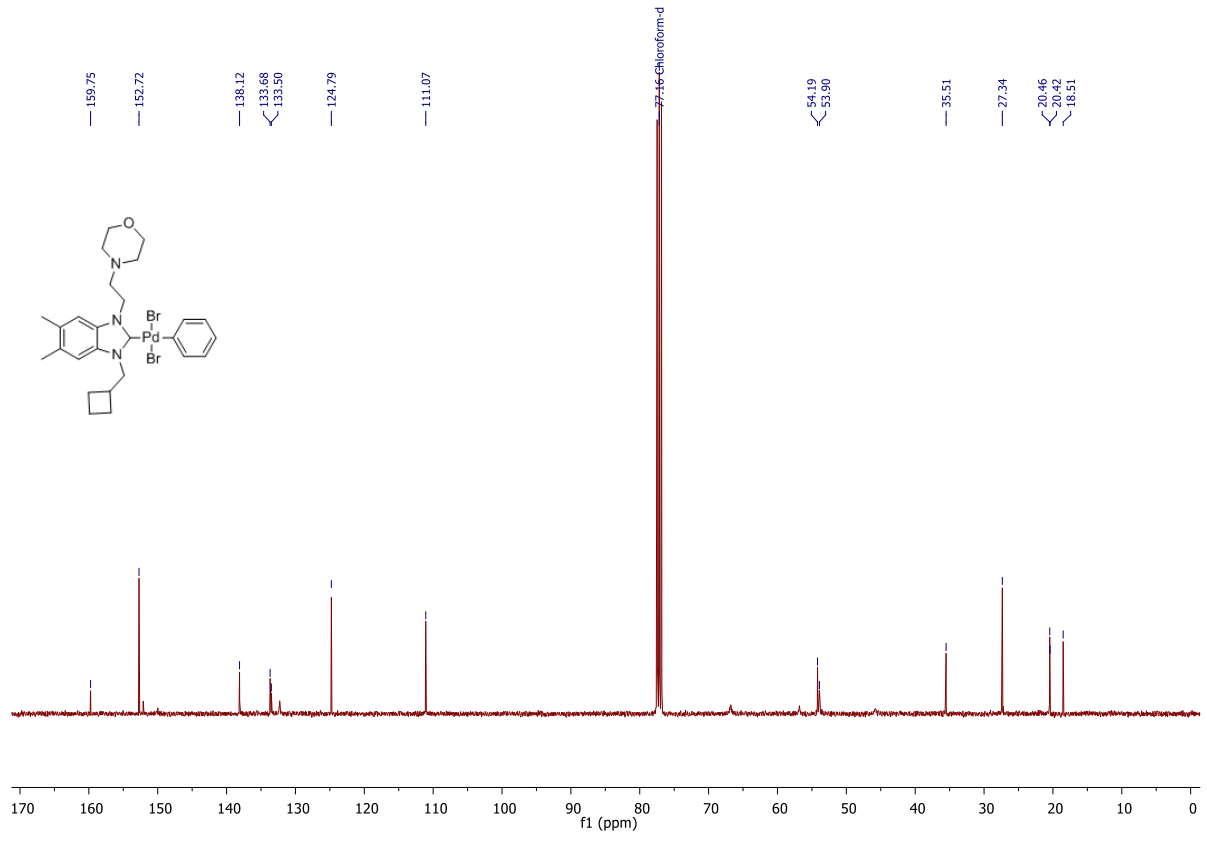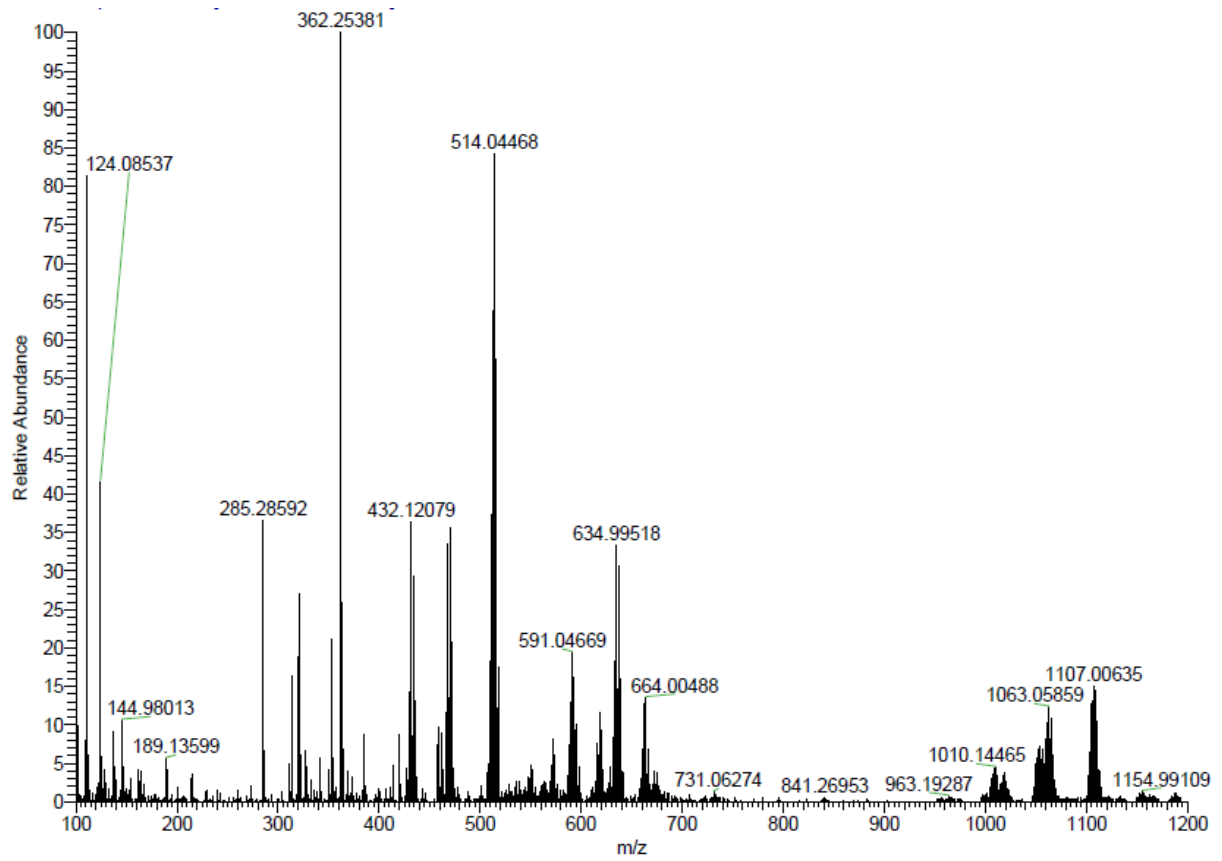

3d

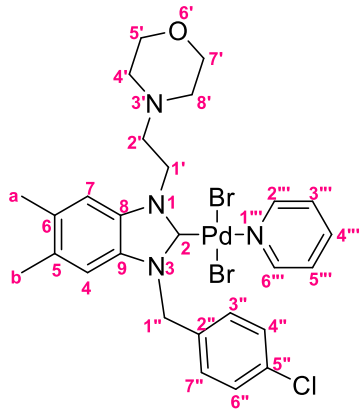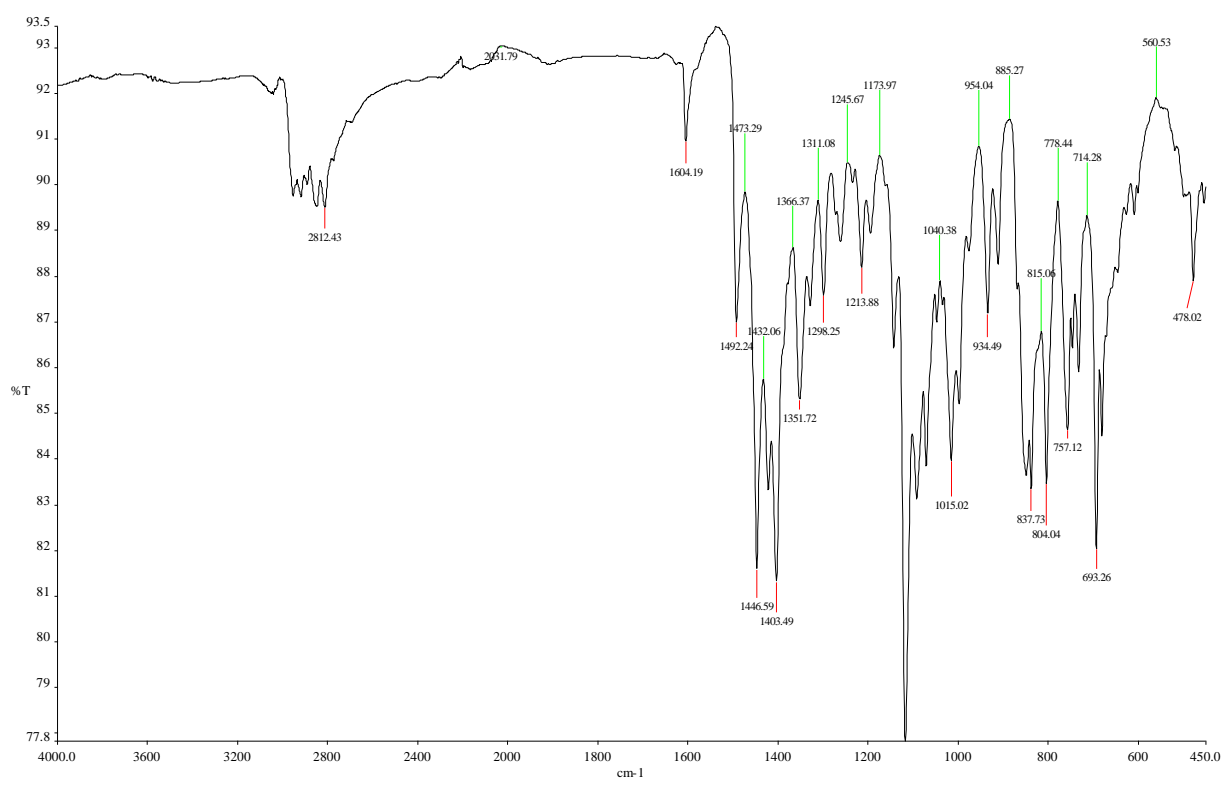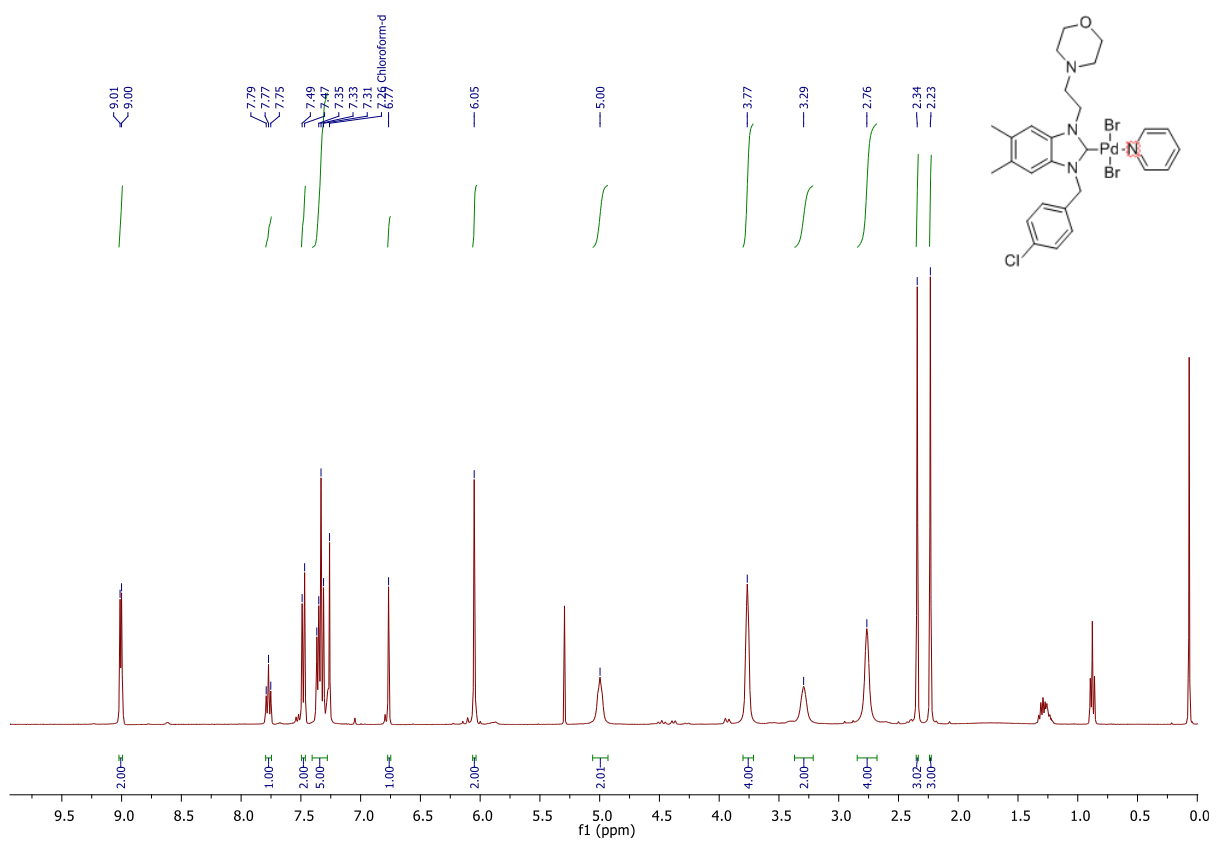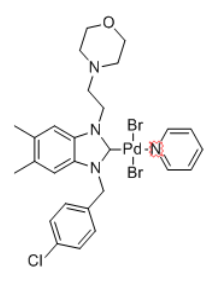

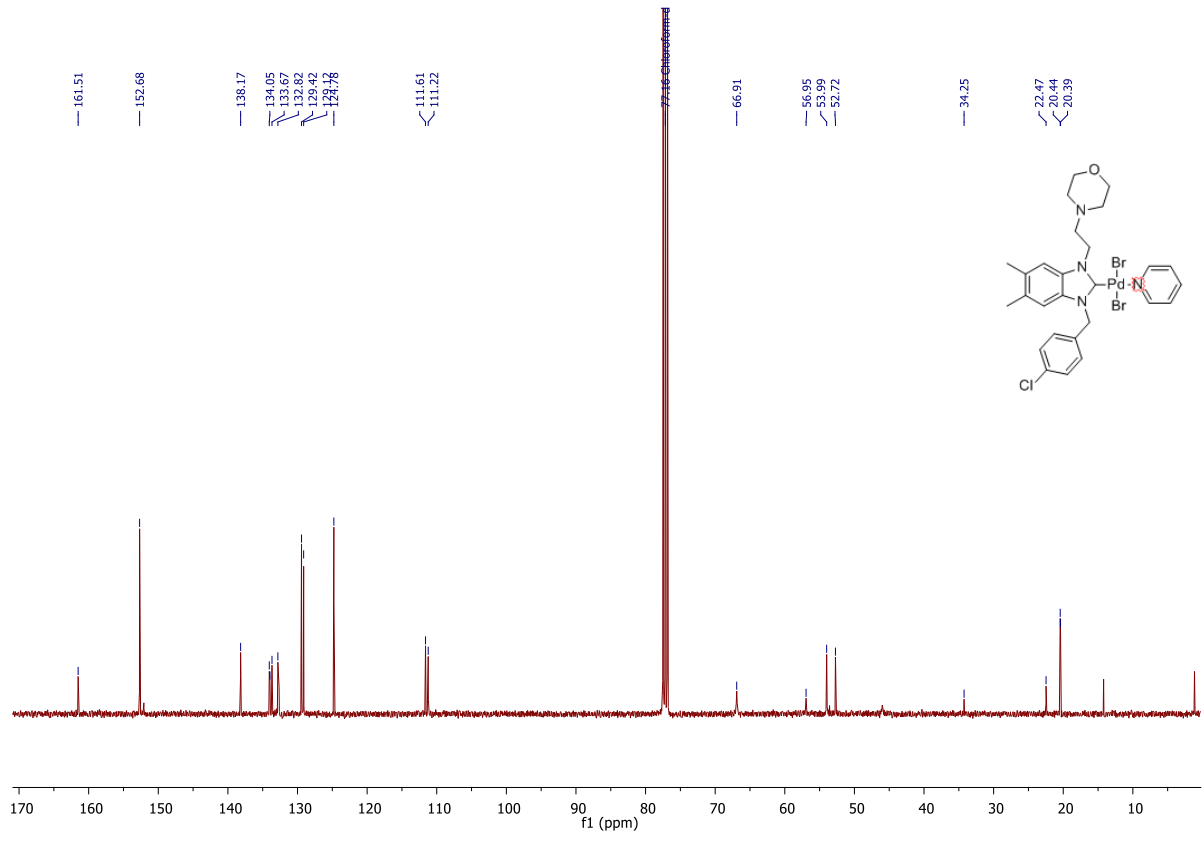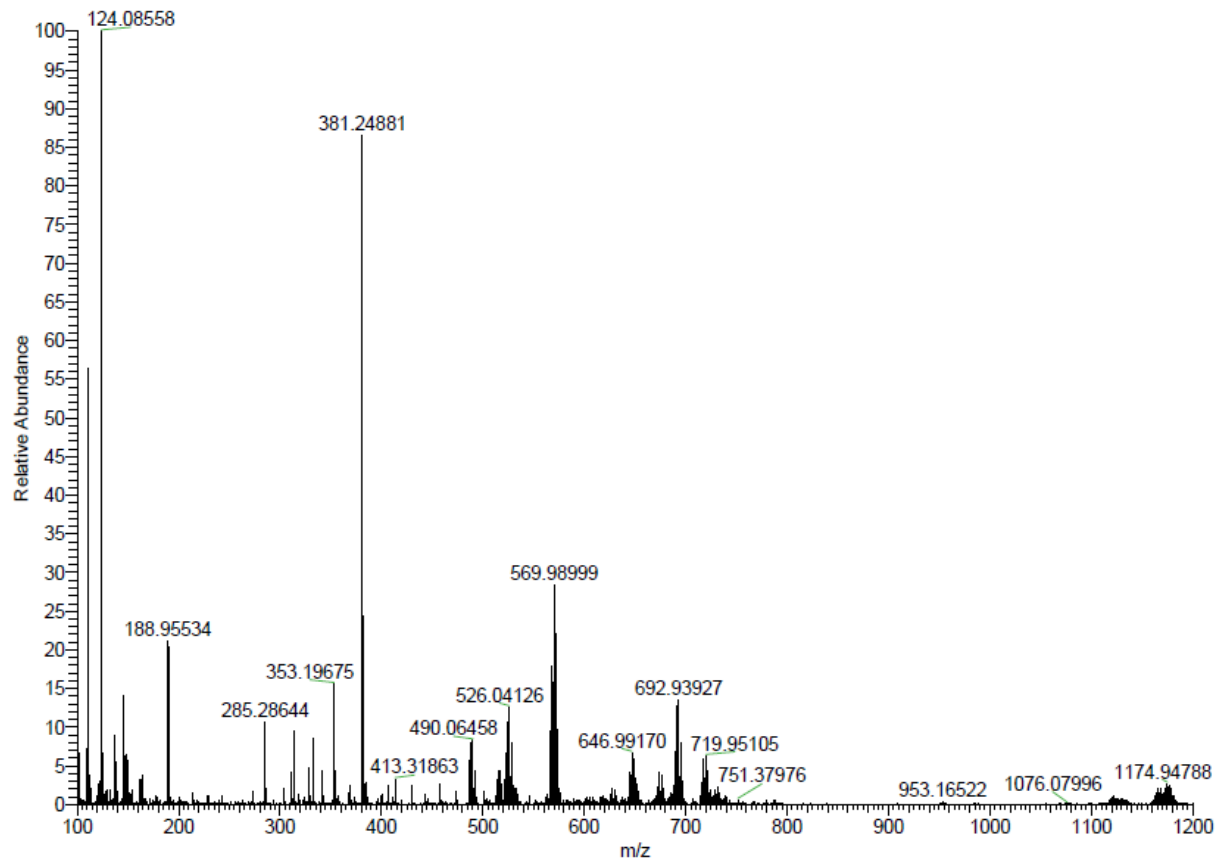

3e

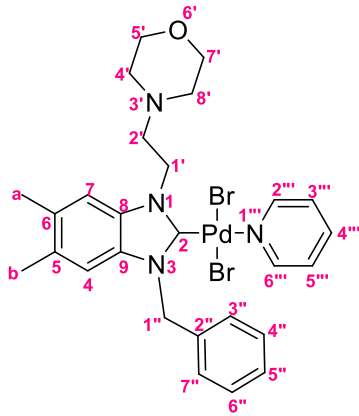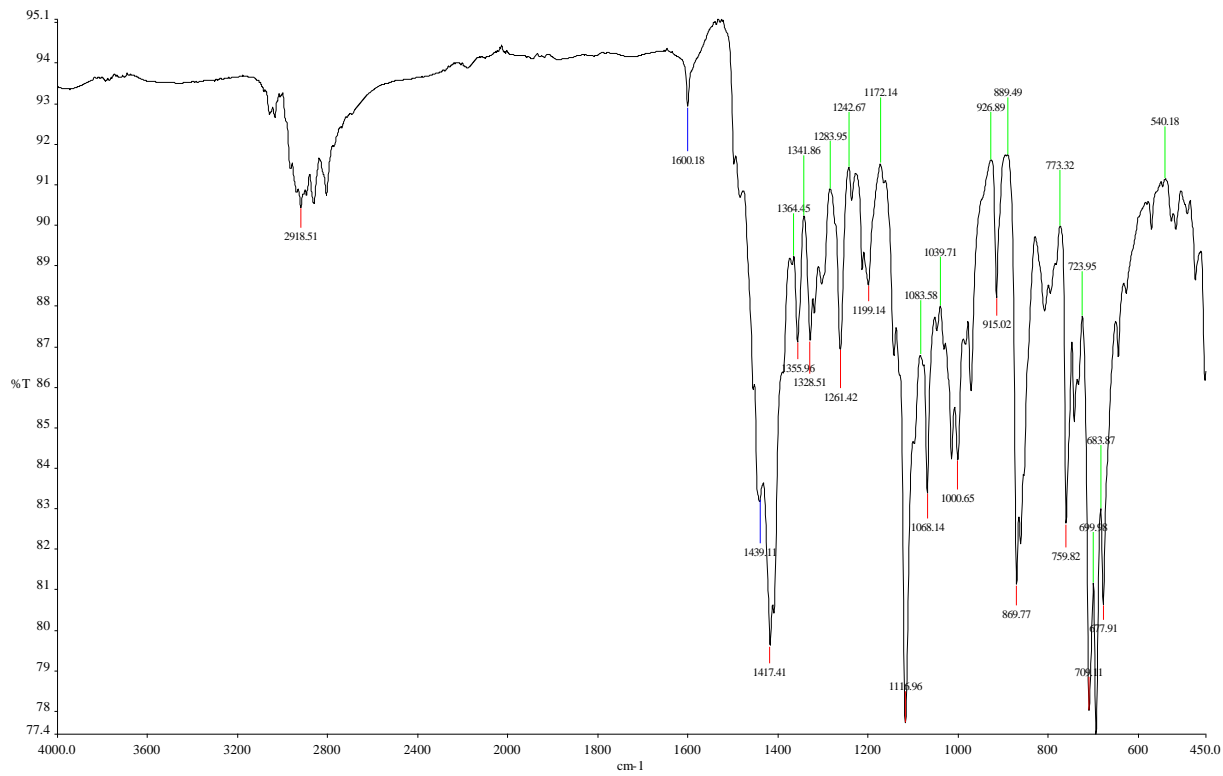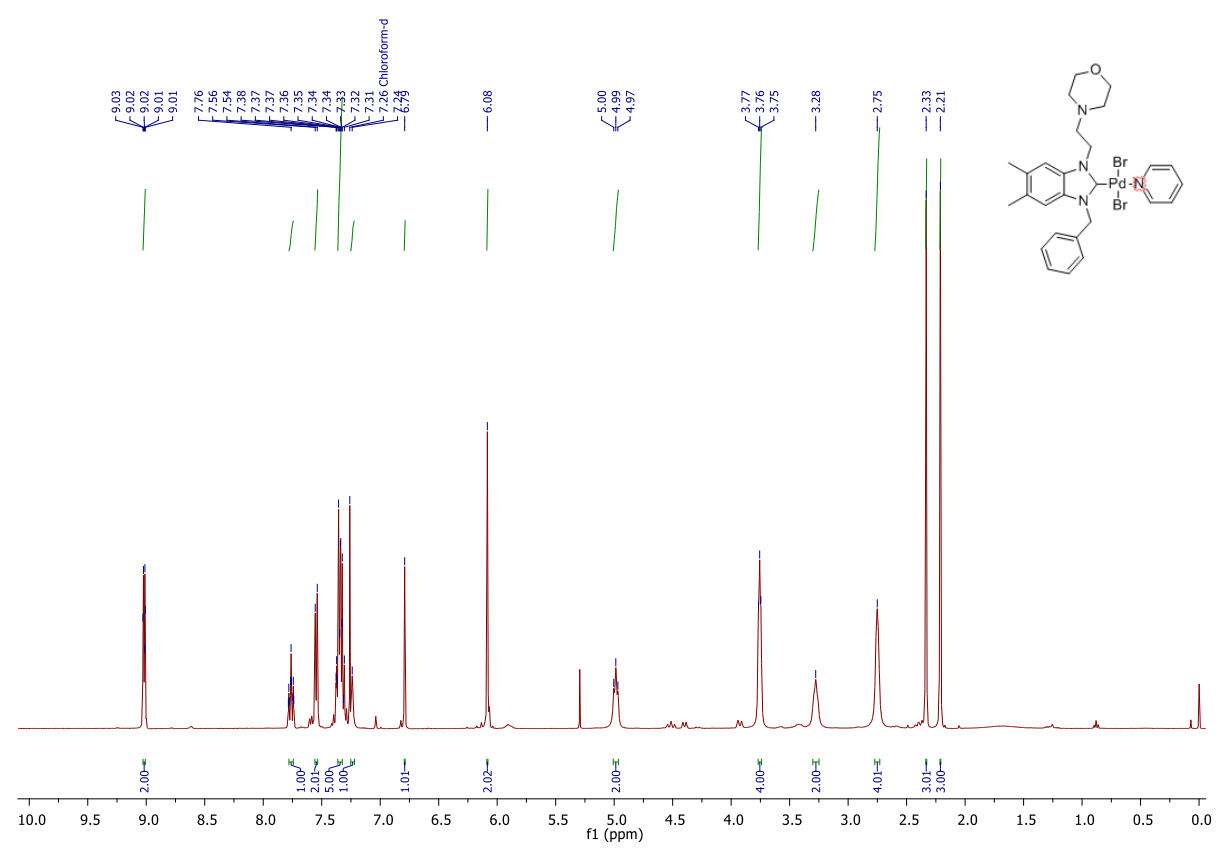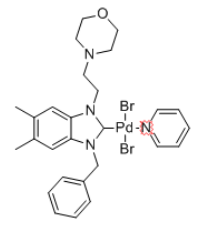

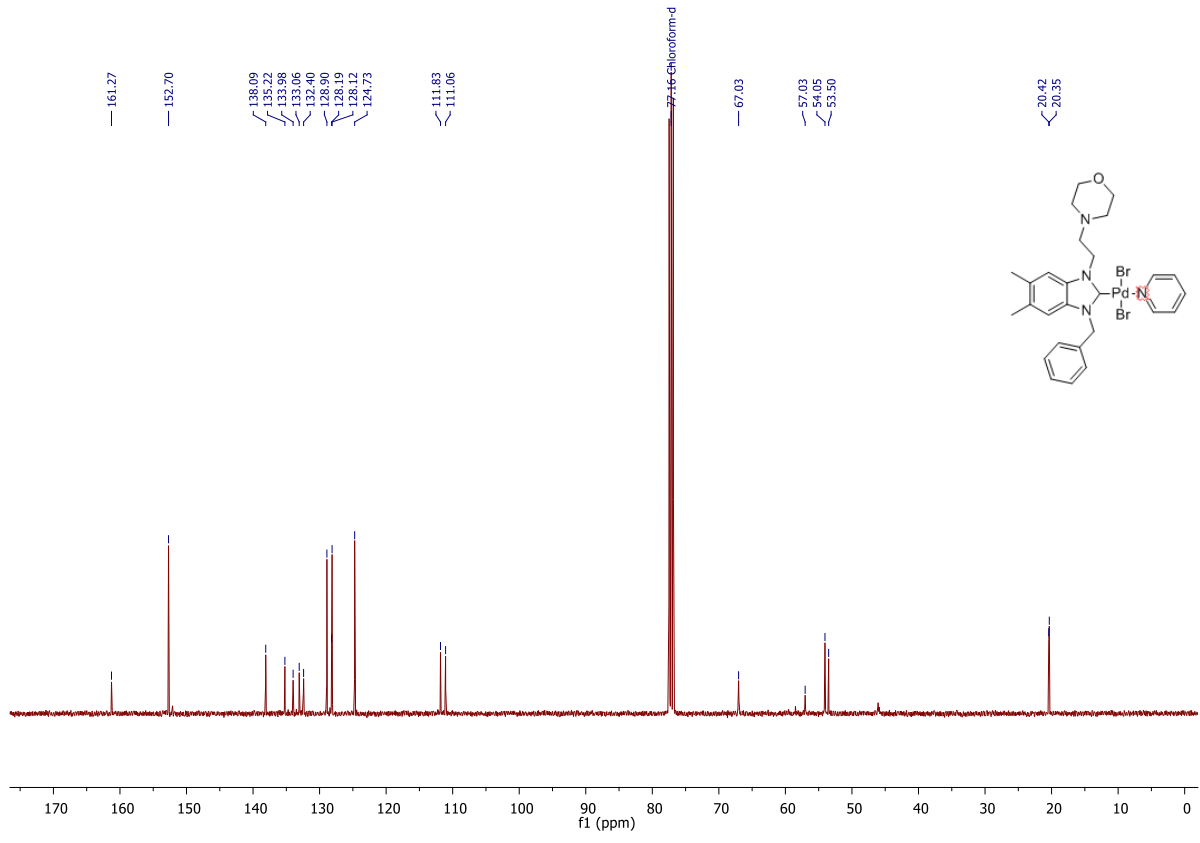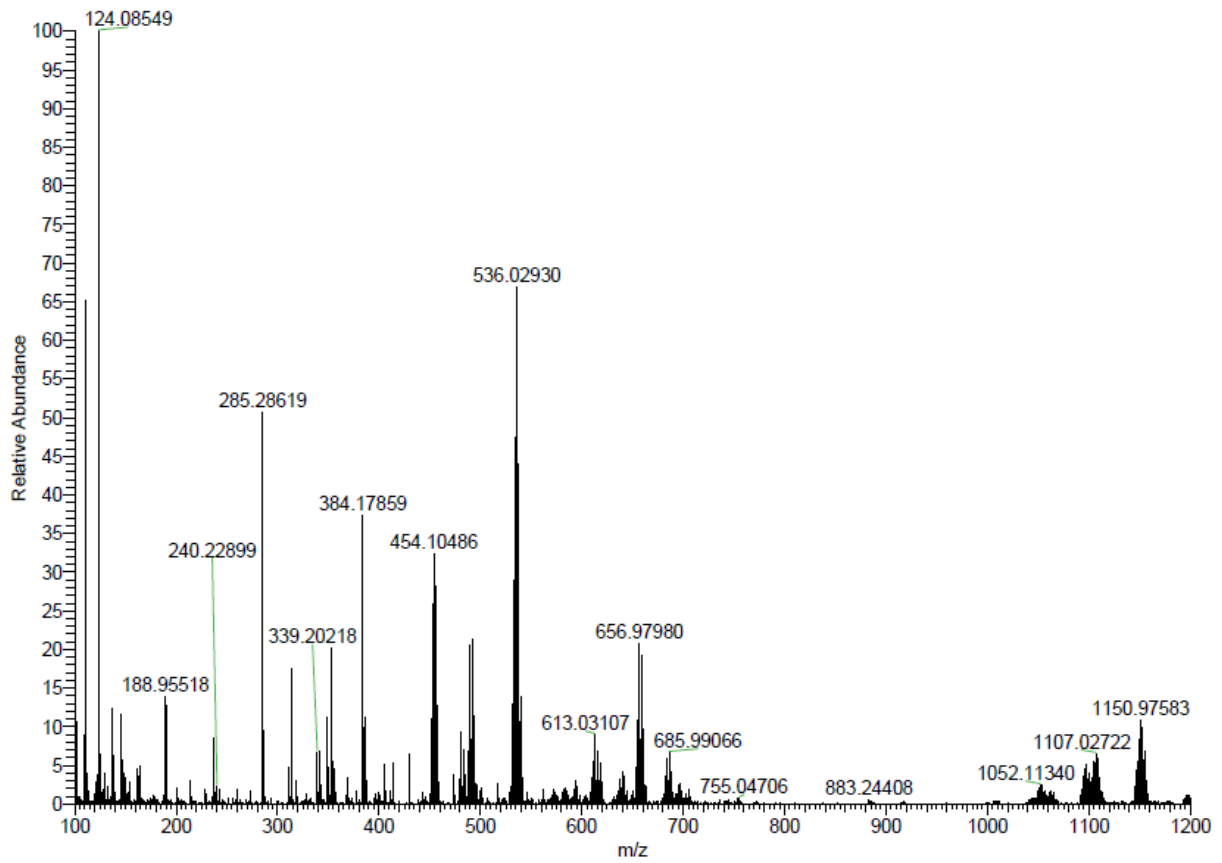

3f

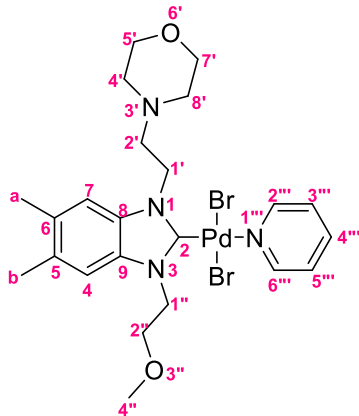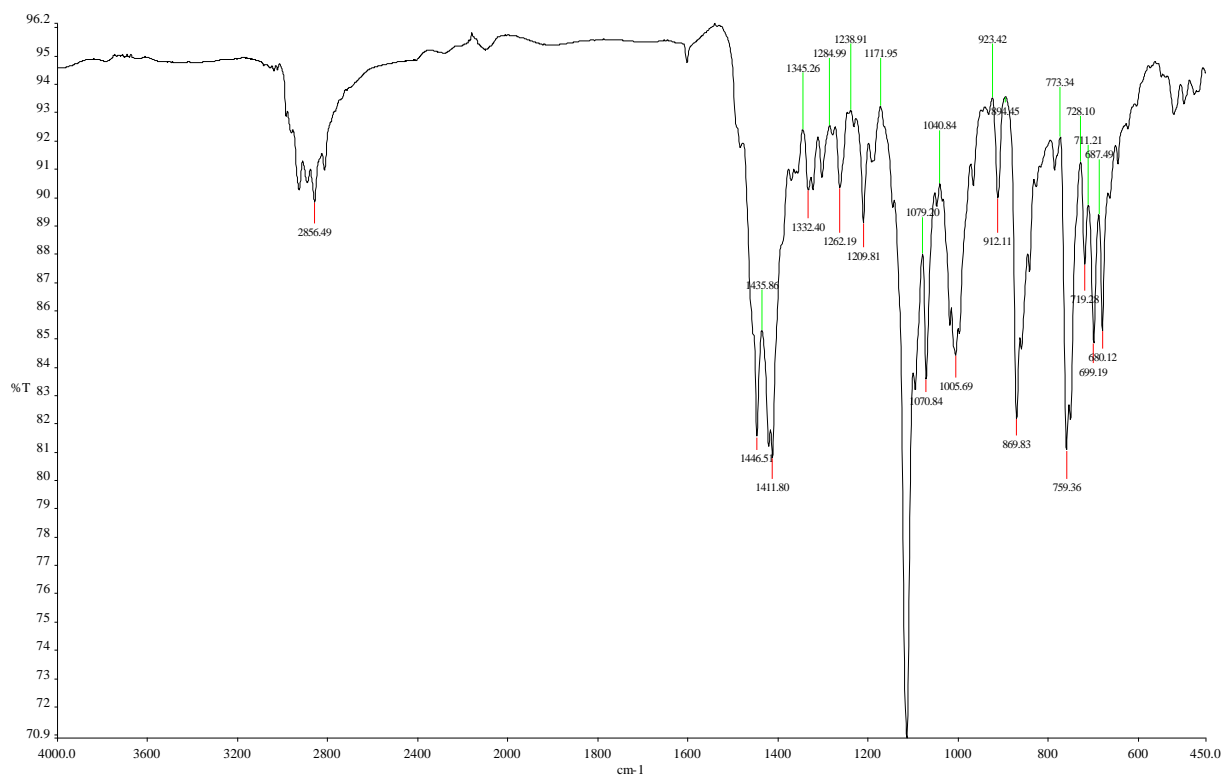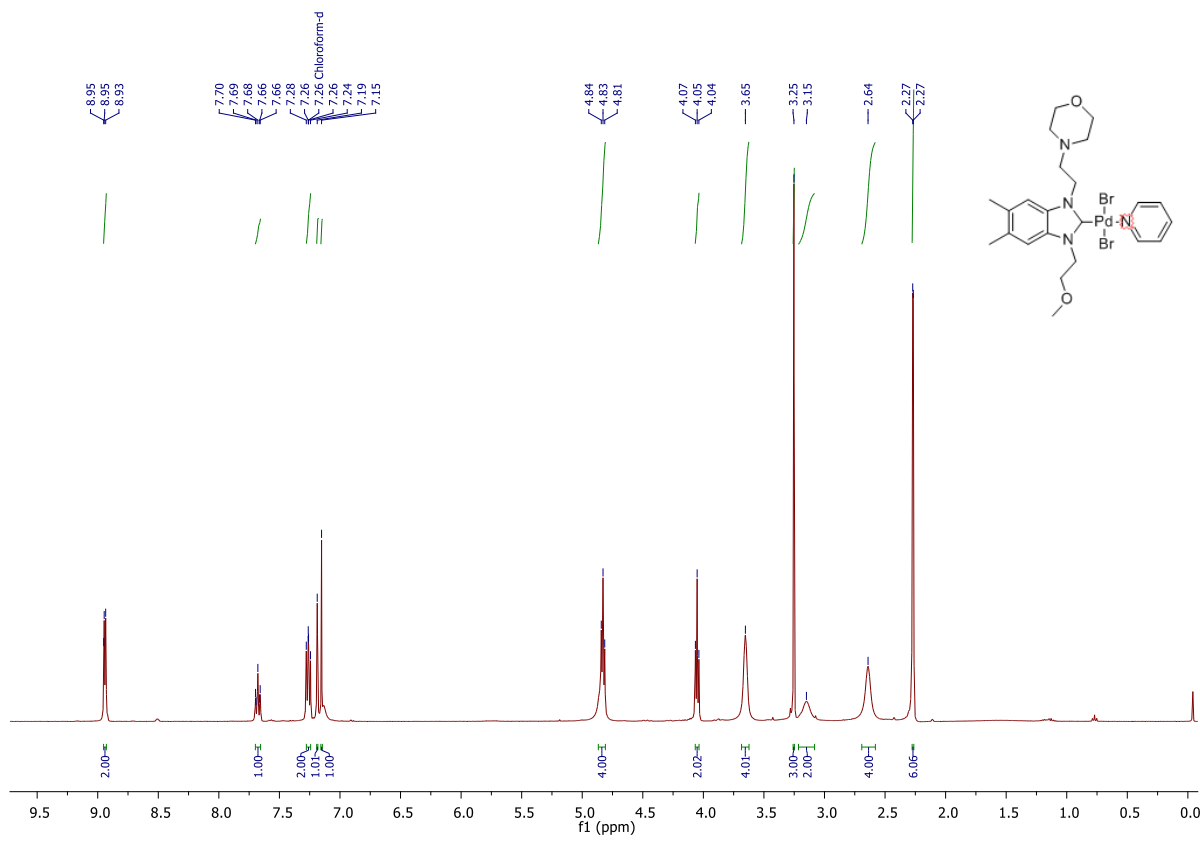

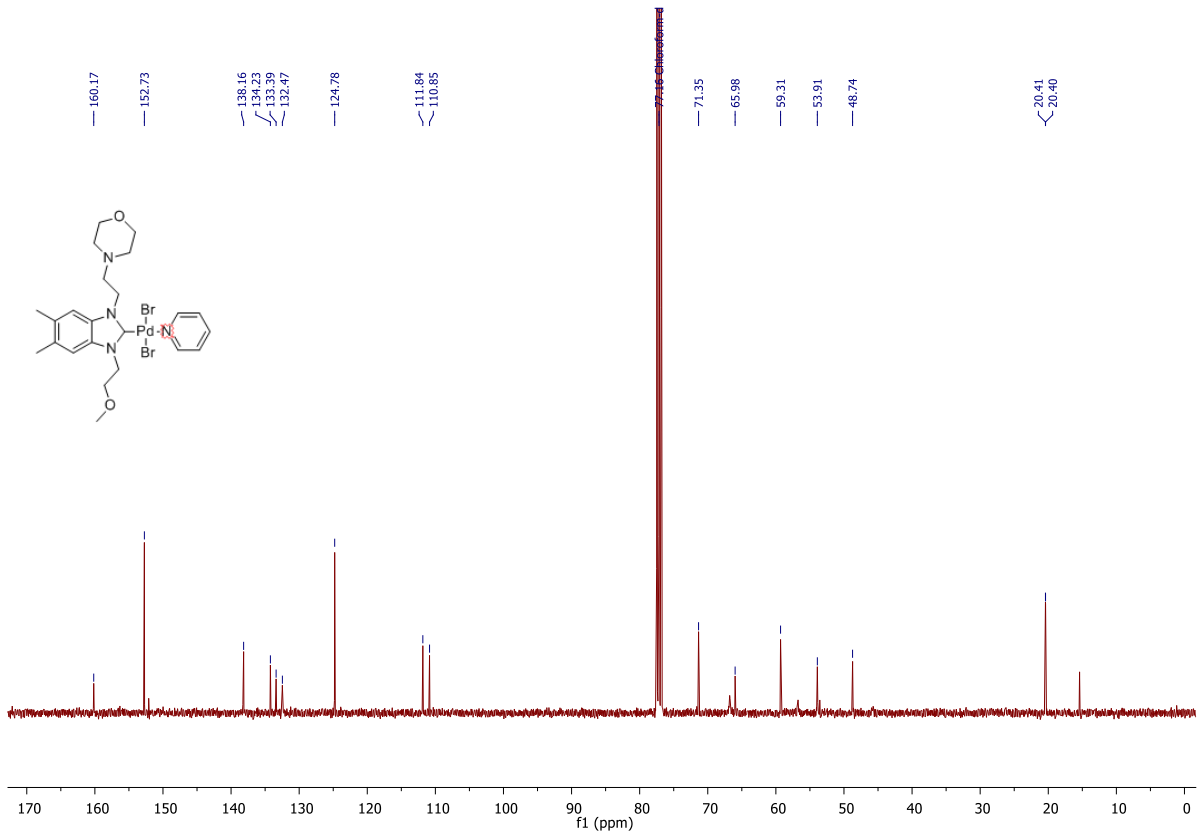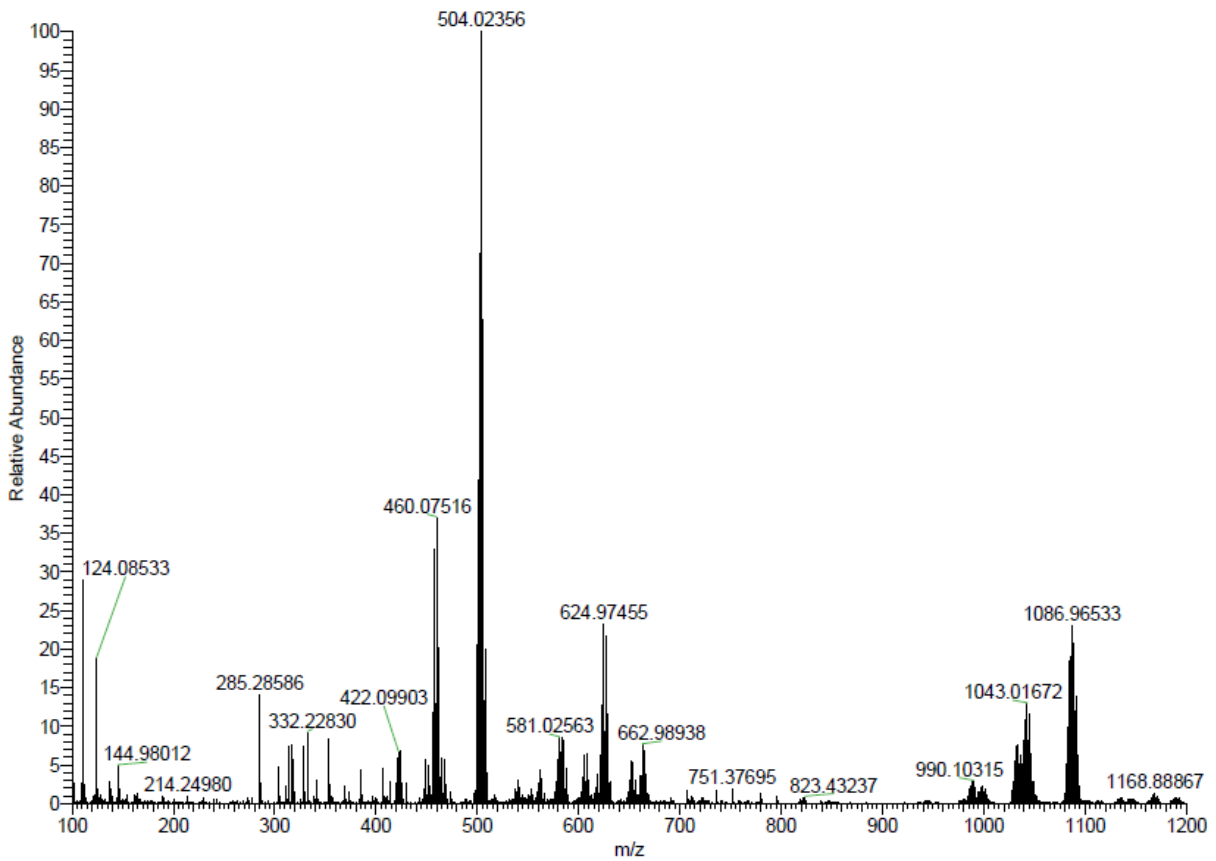

3g



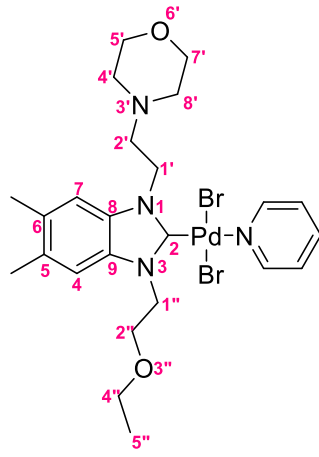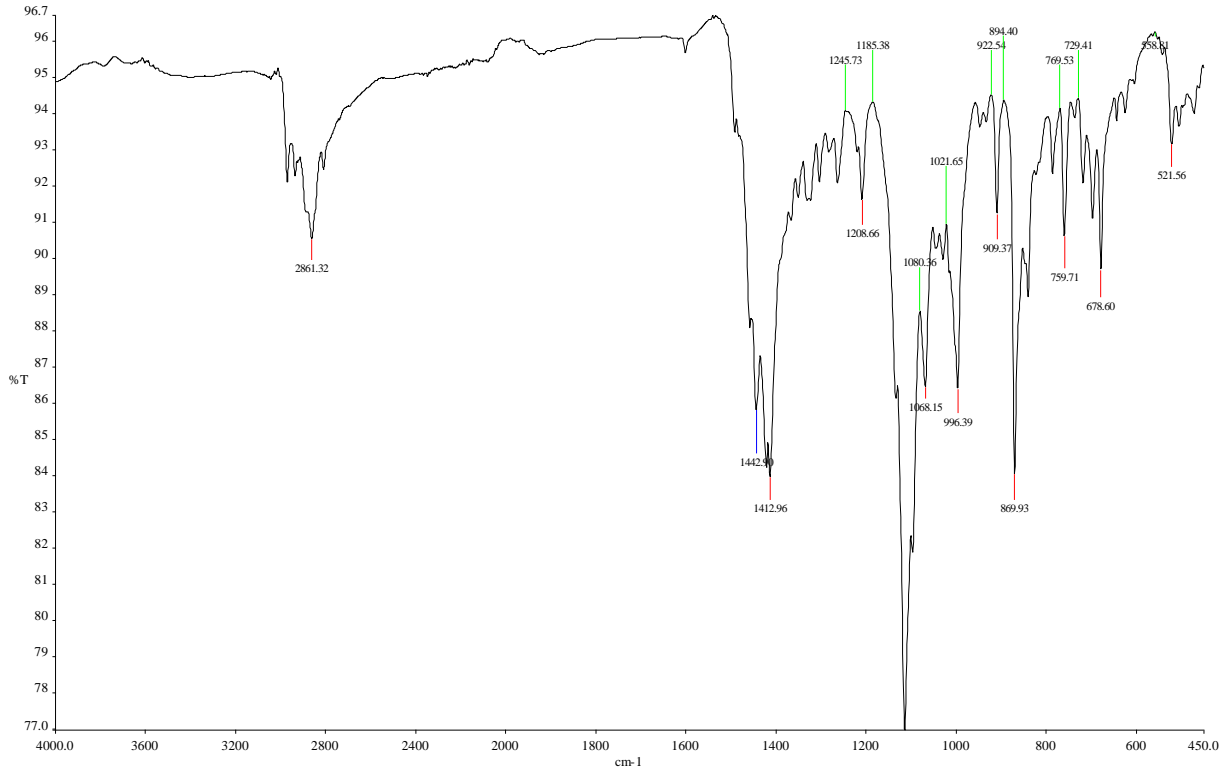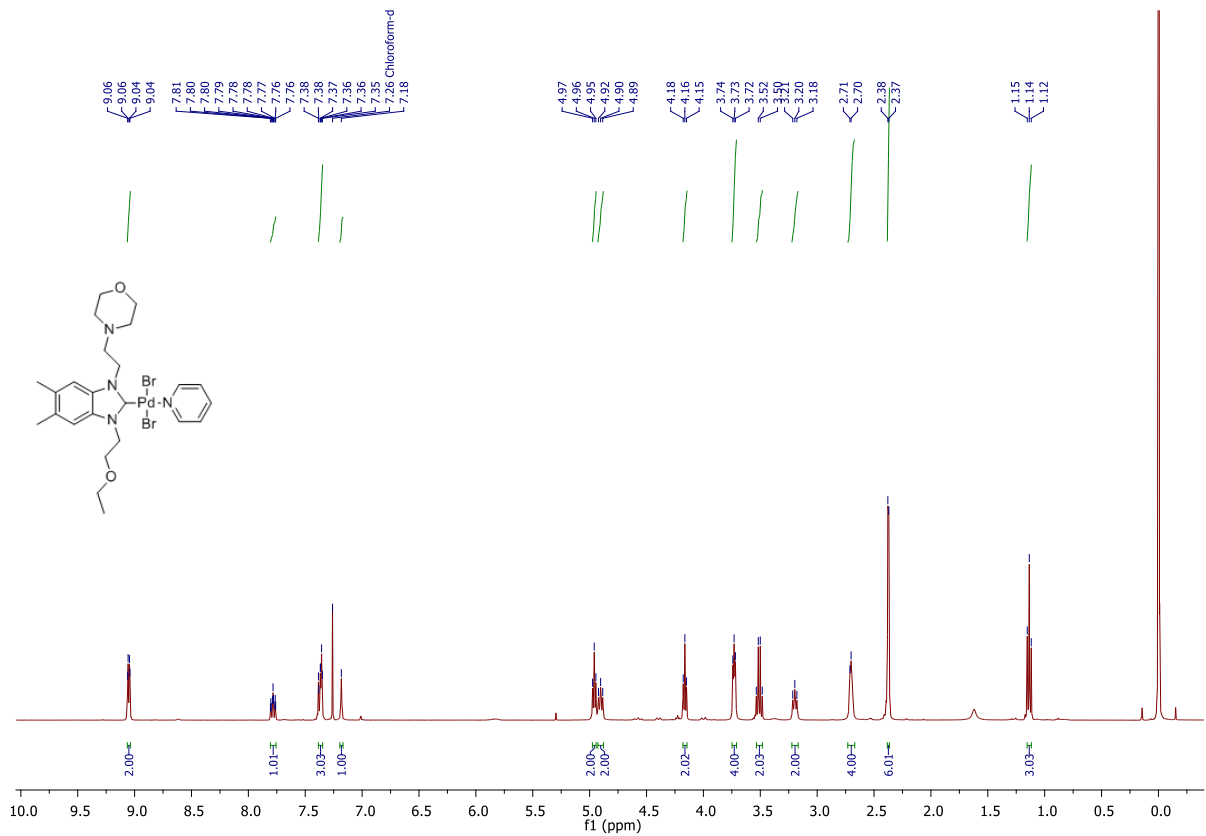

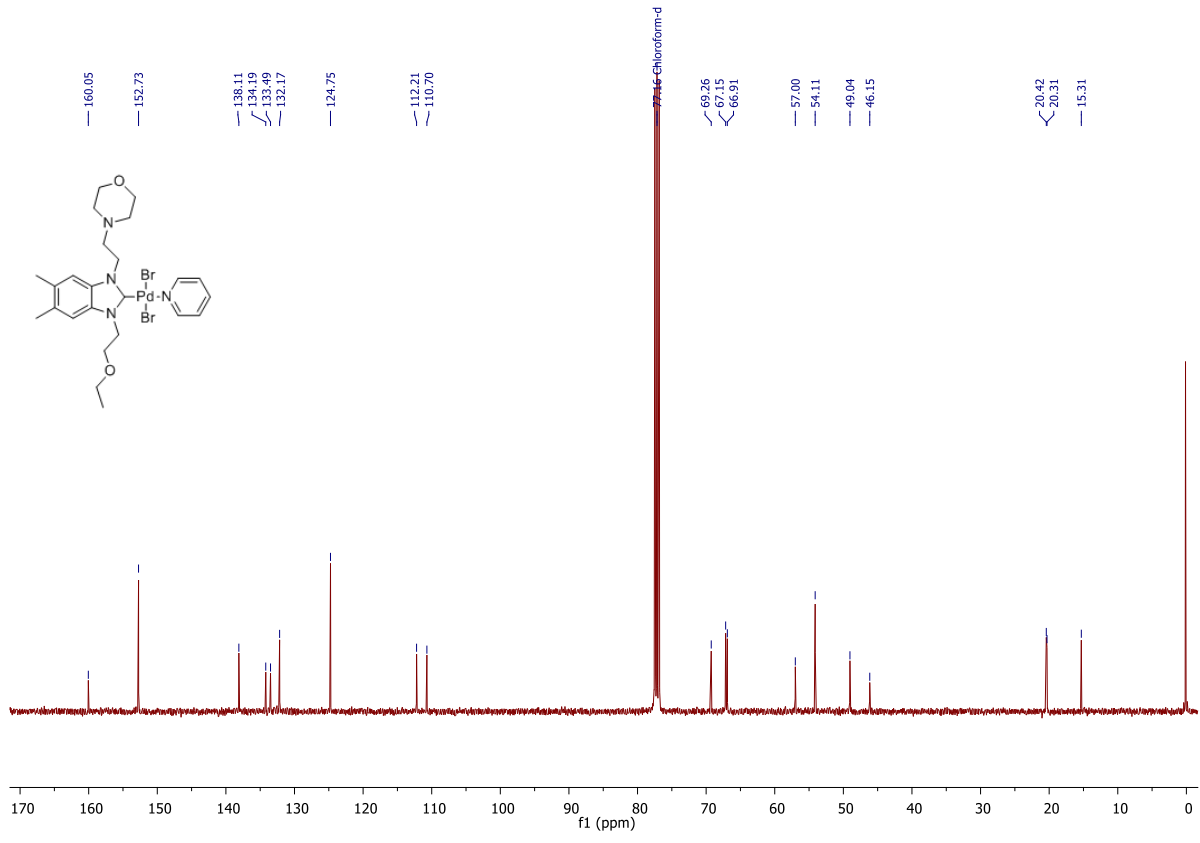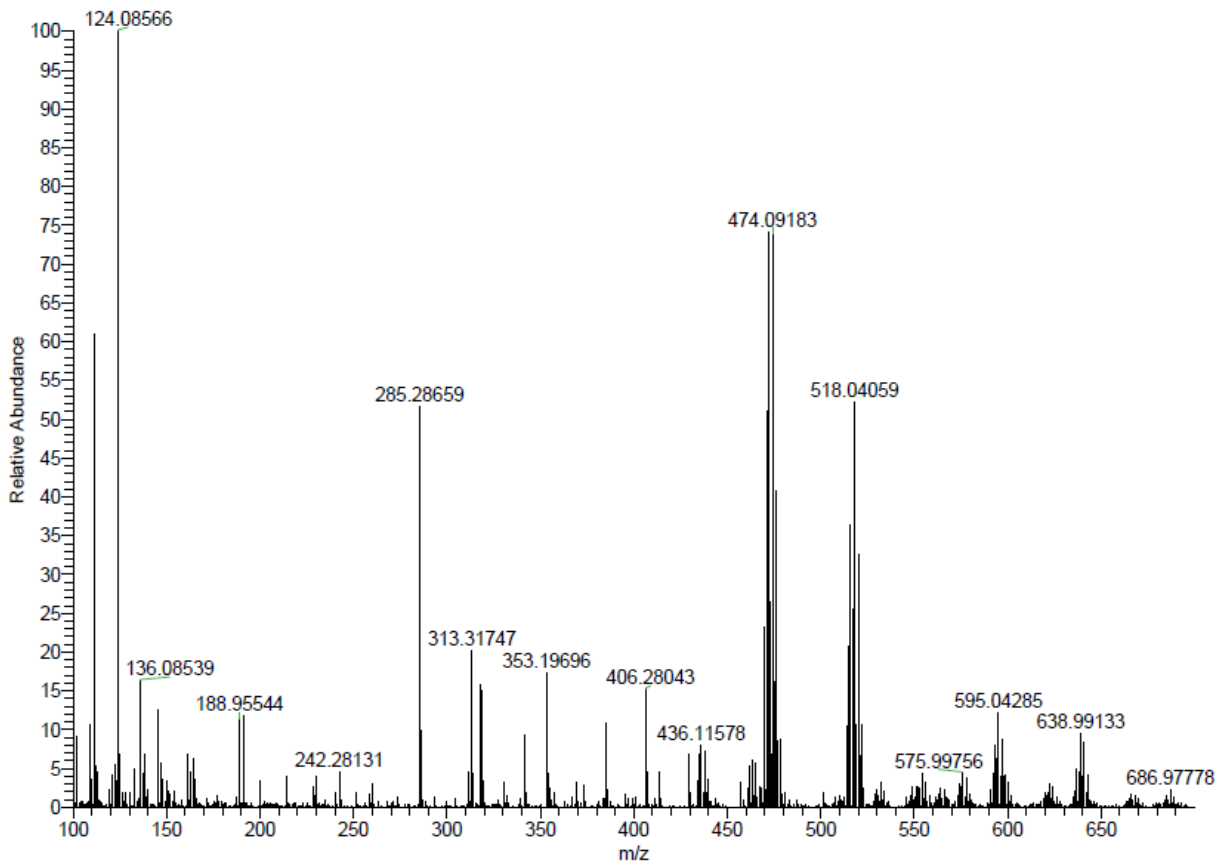

3h

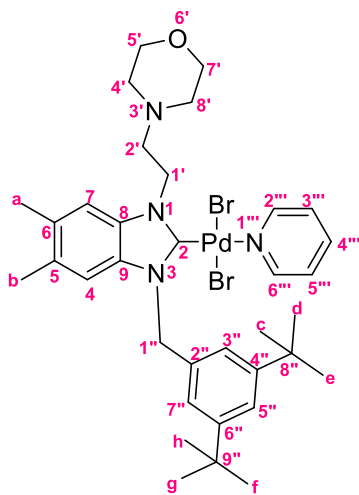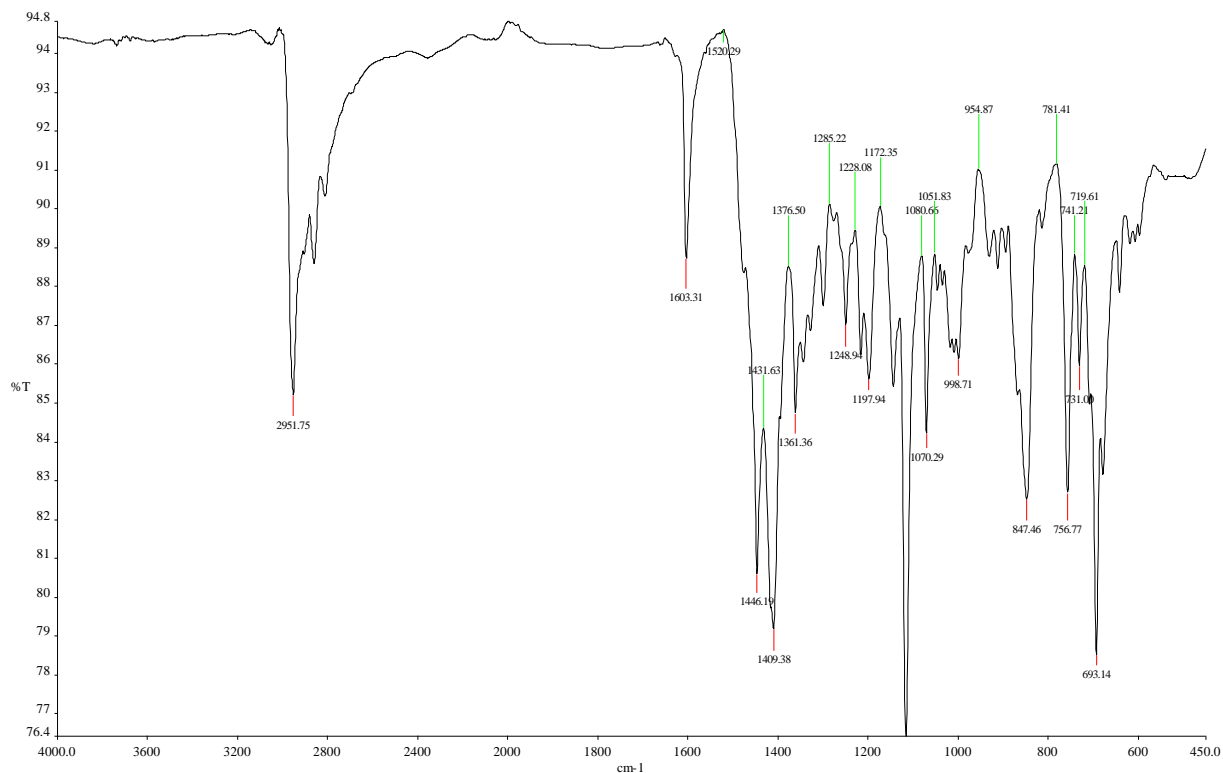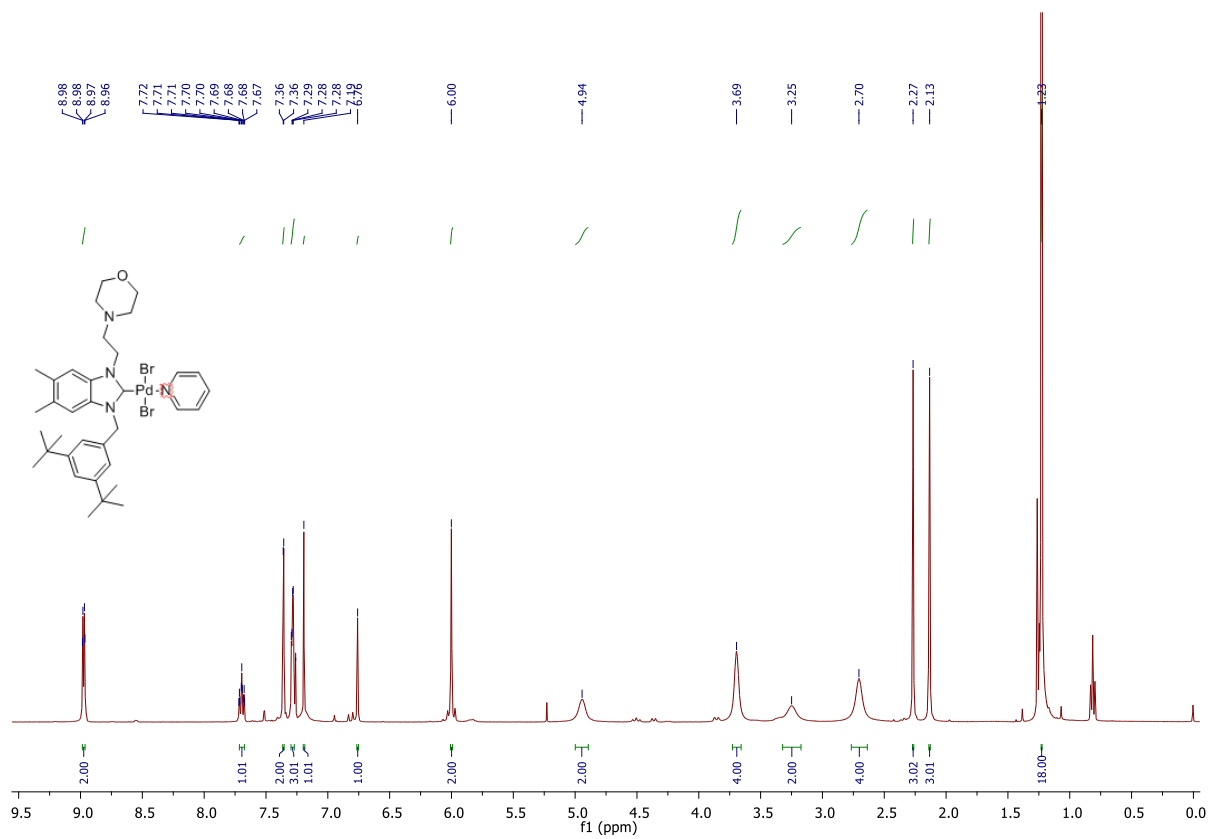

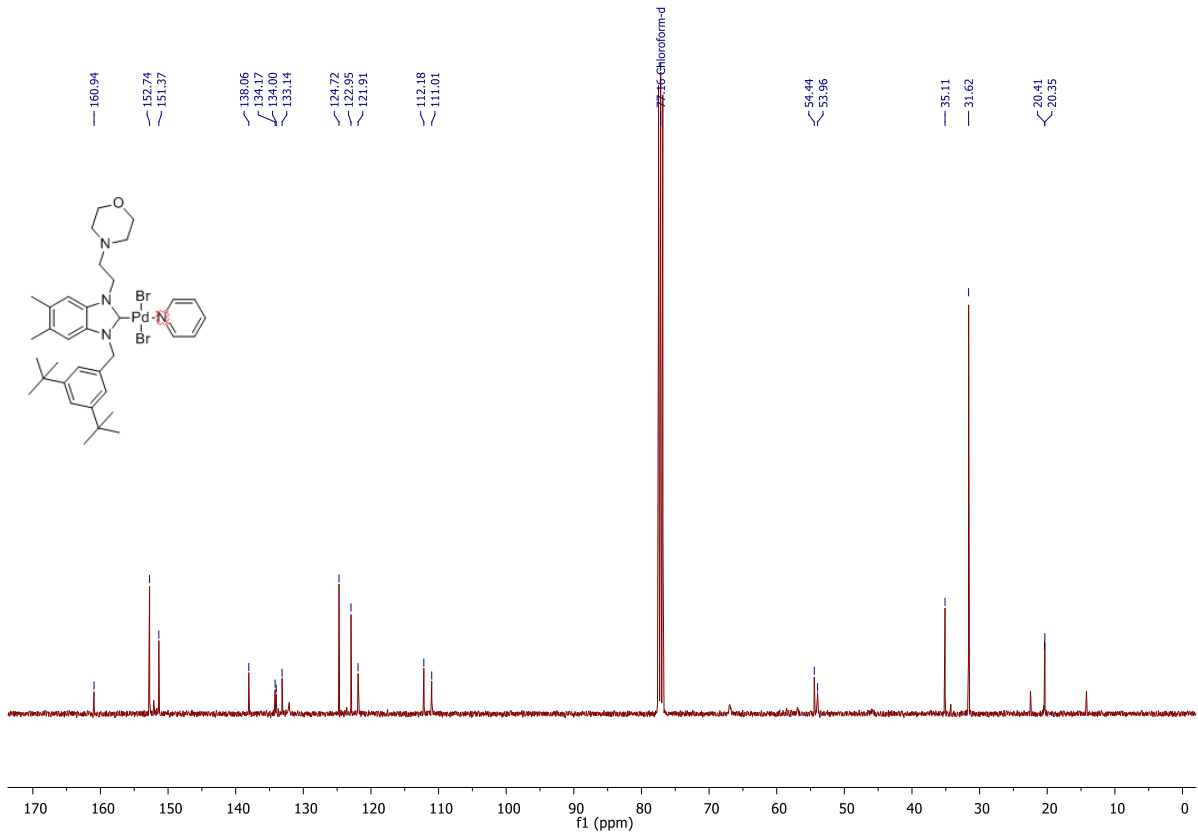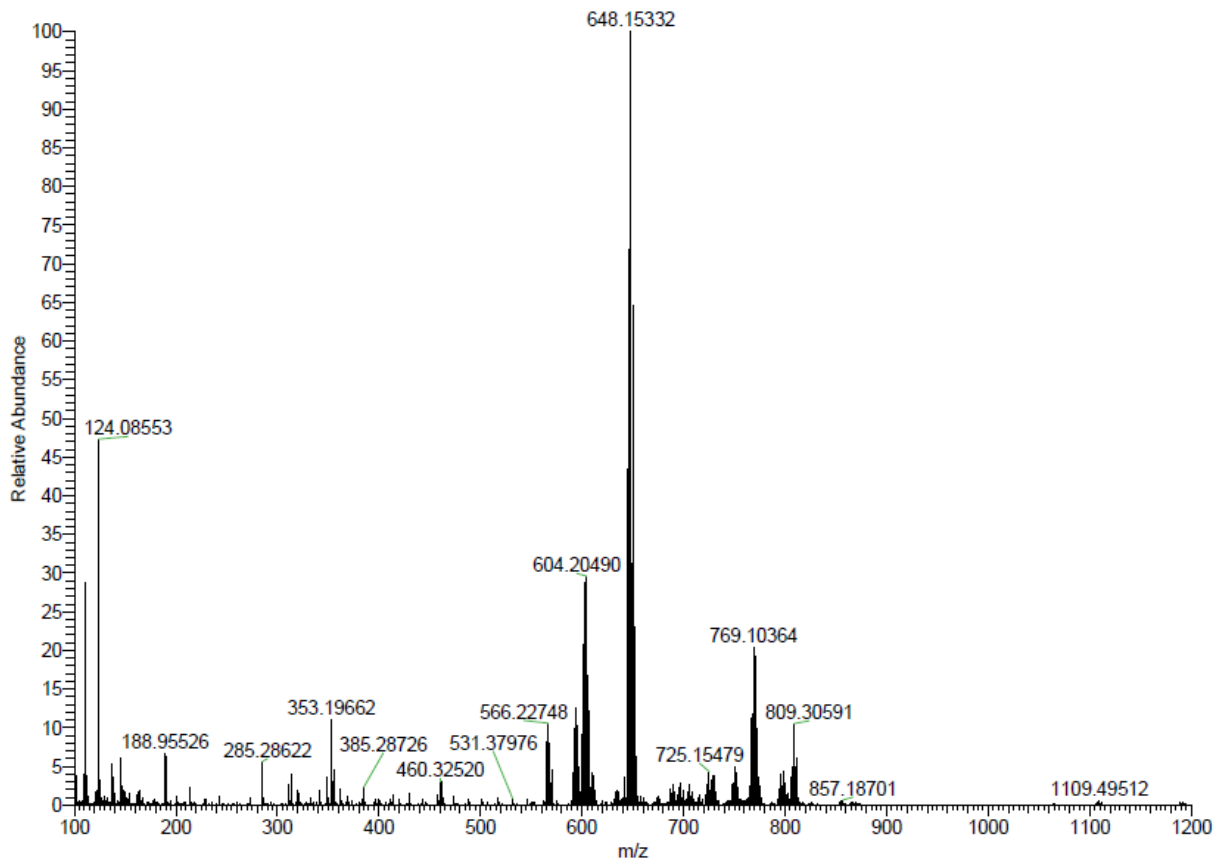

3i

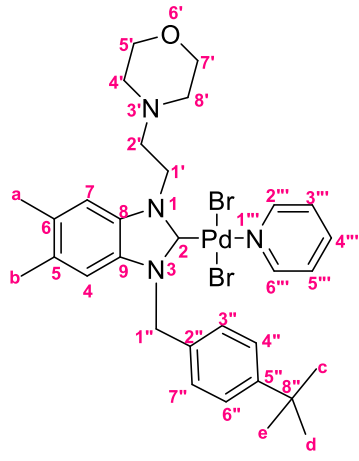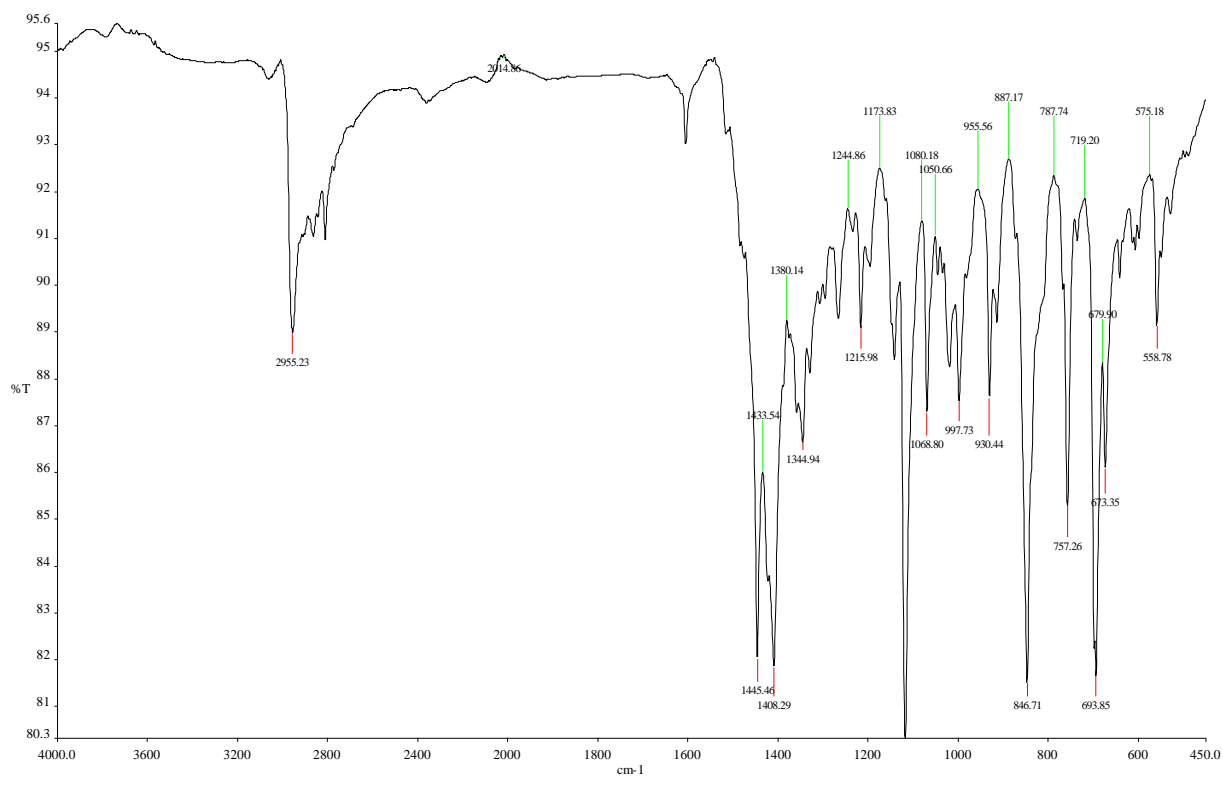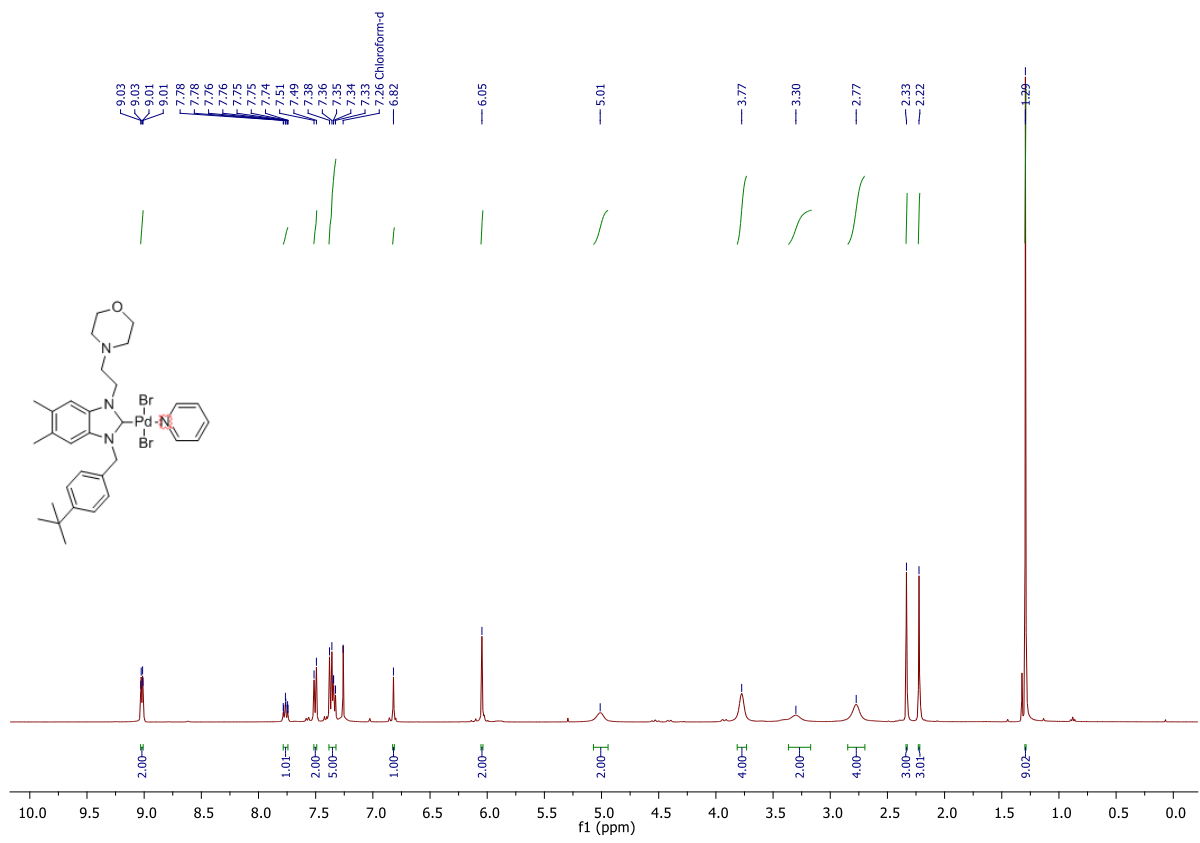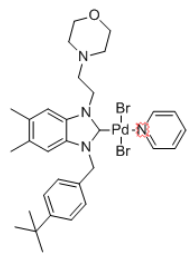

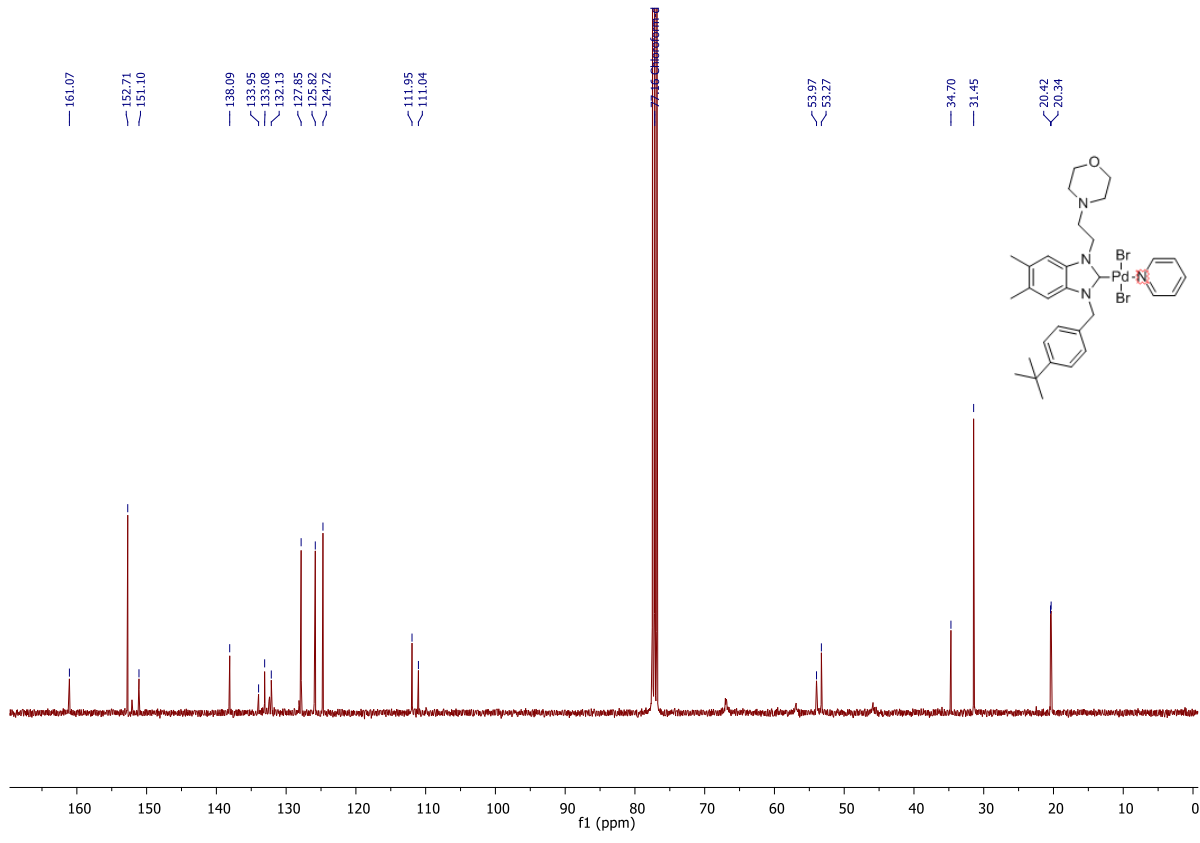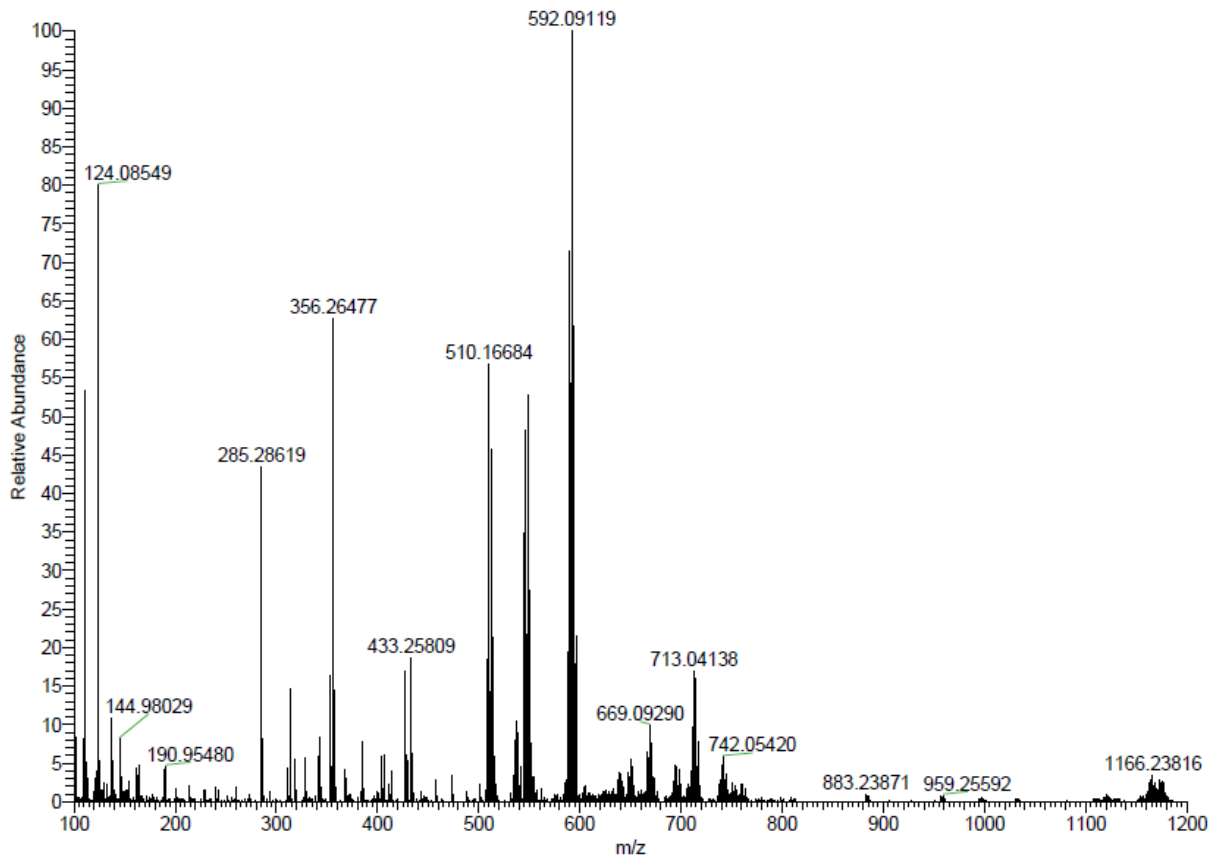

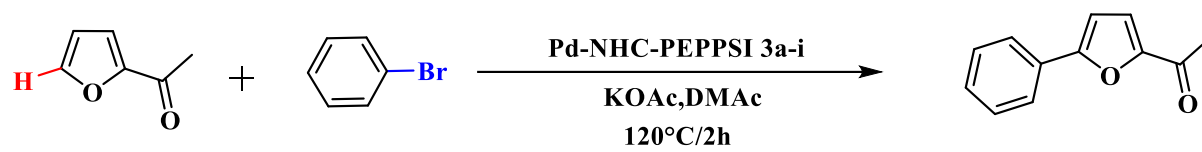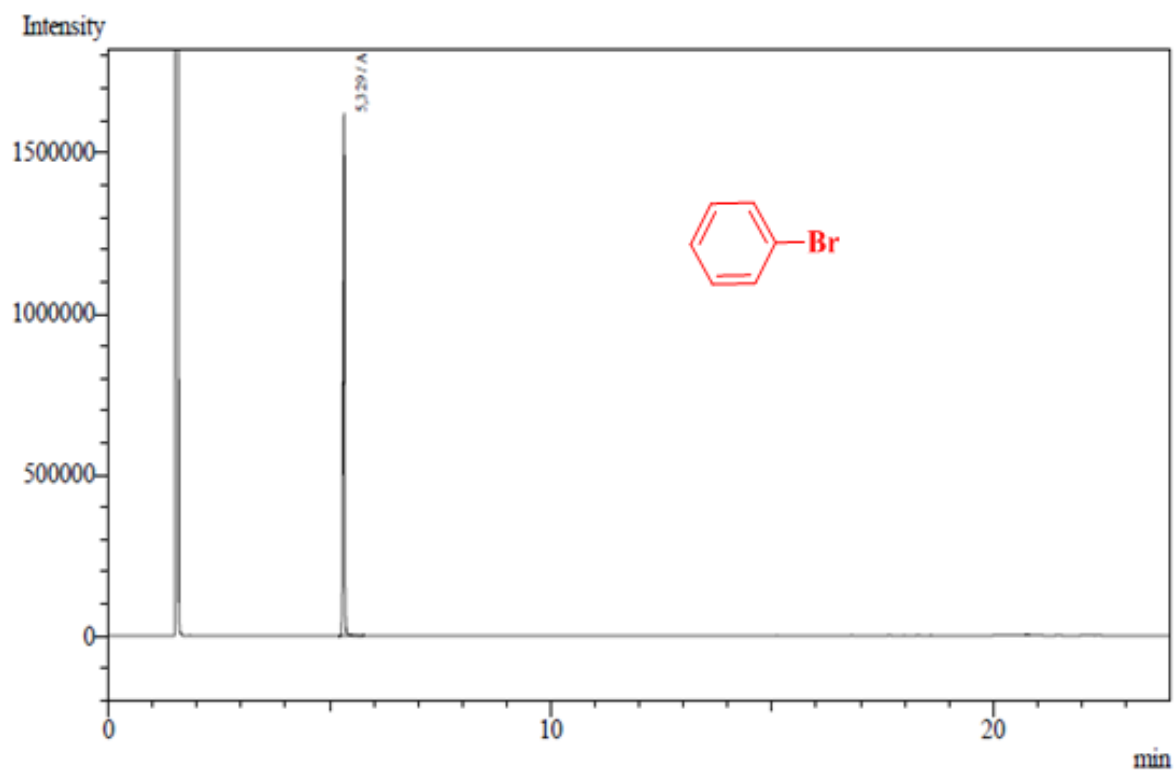

3a

Intensity

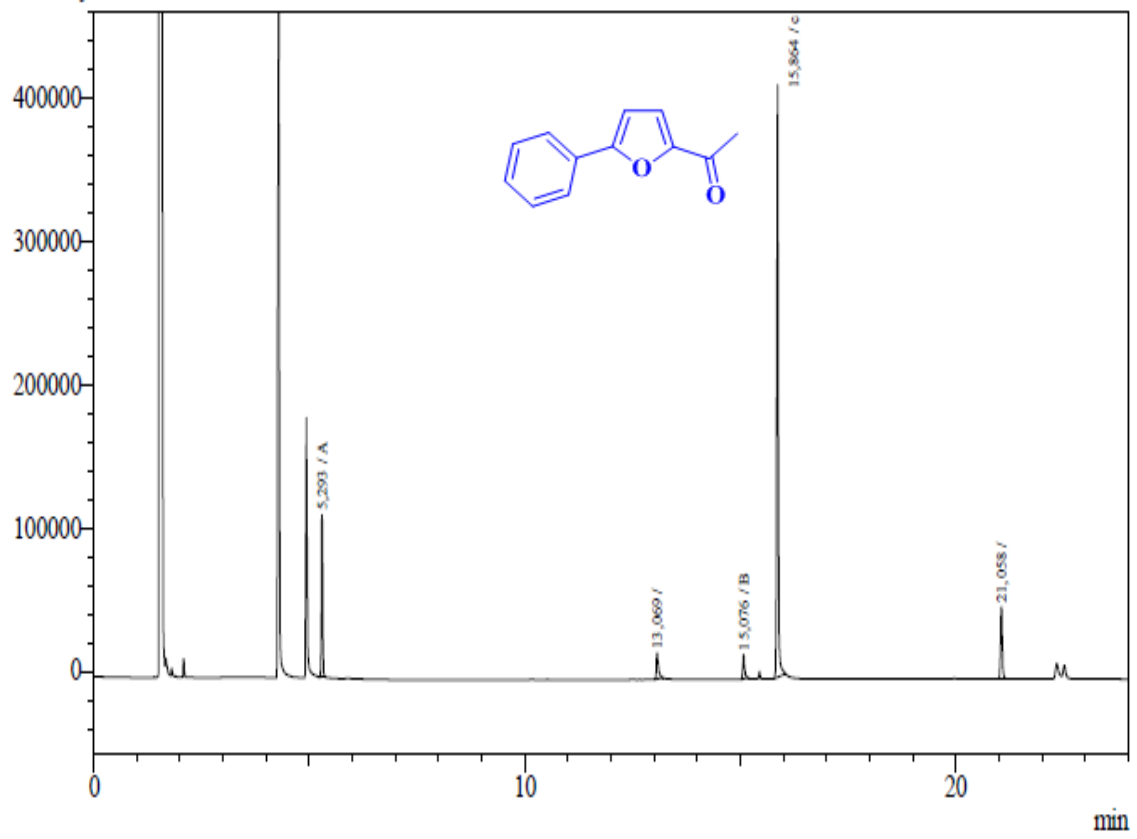

3b

Intensity

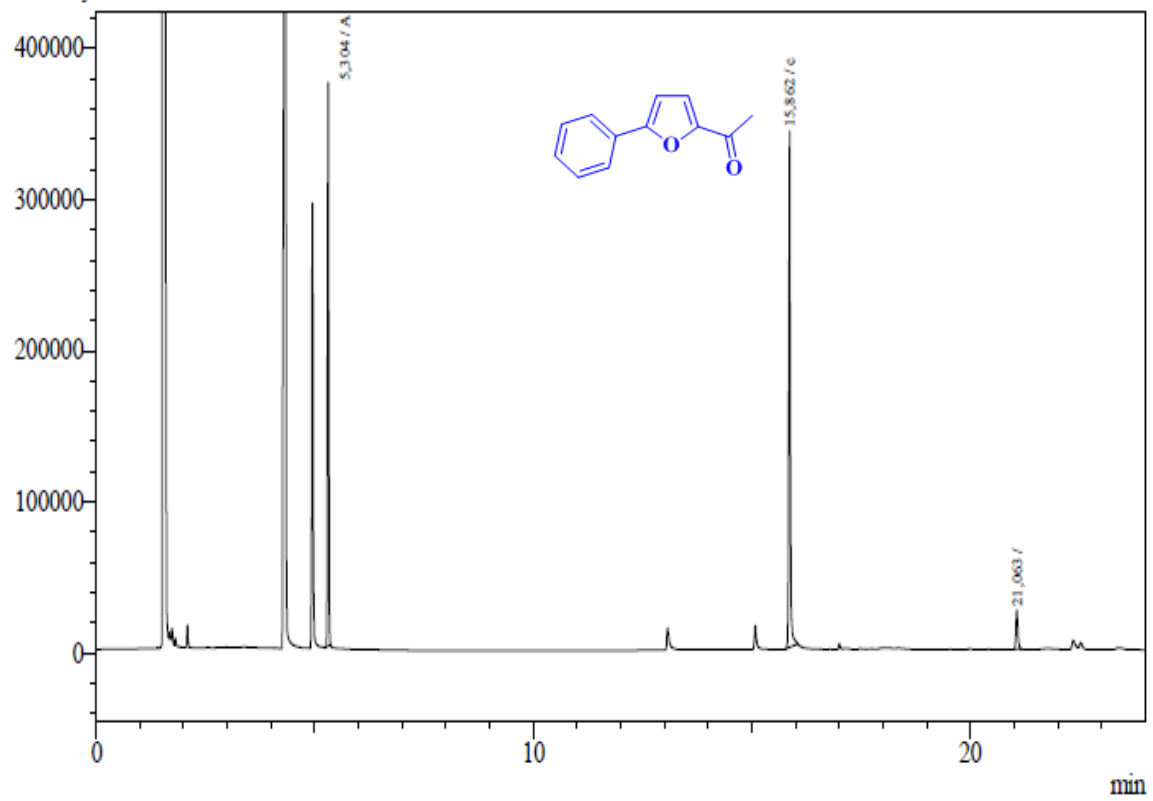

3c



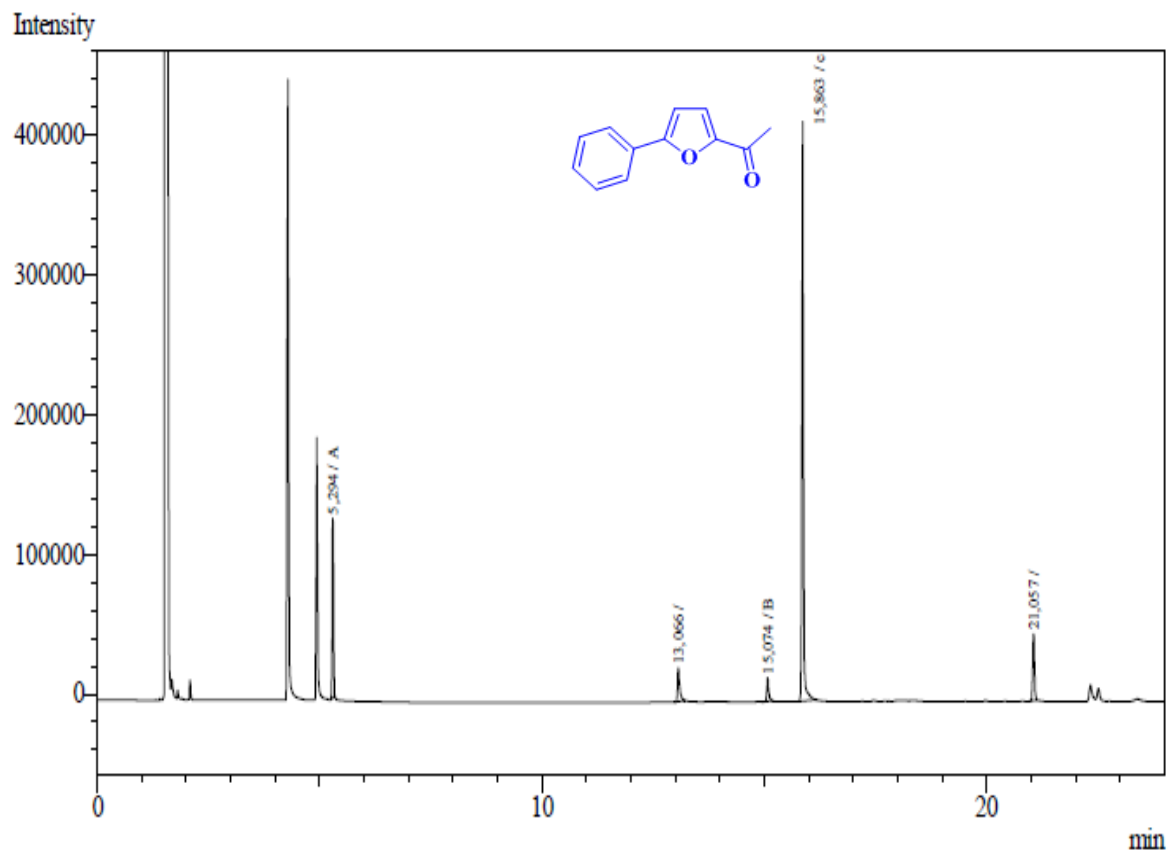

3d

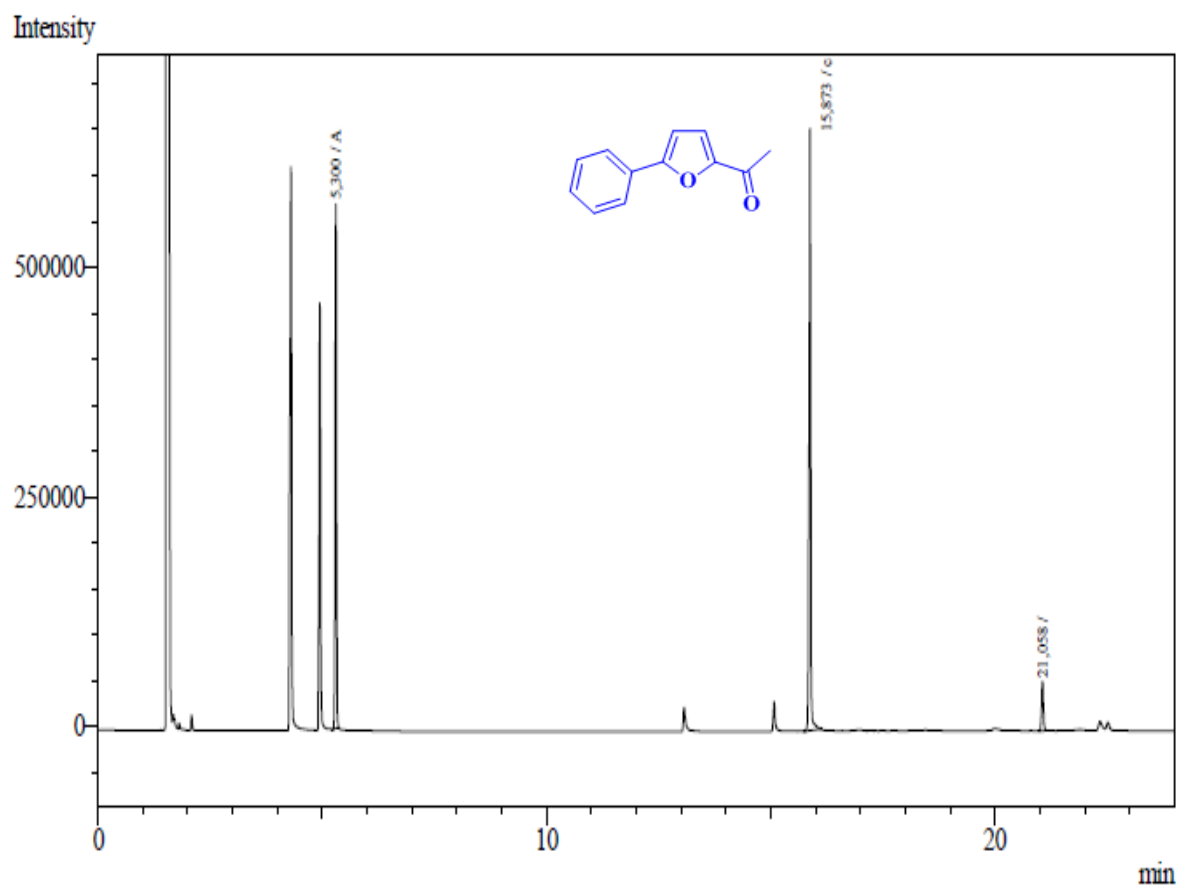

3e

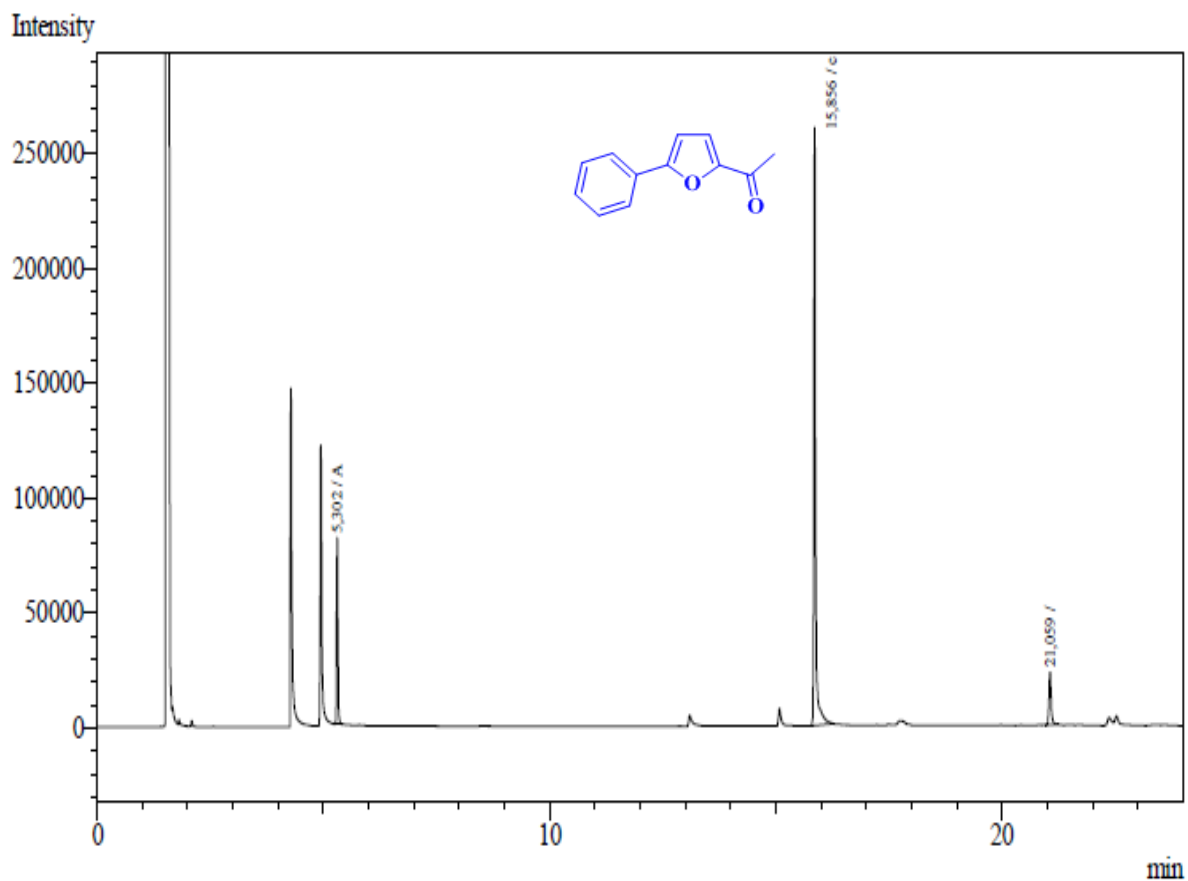

3f

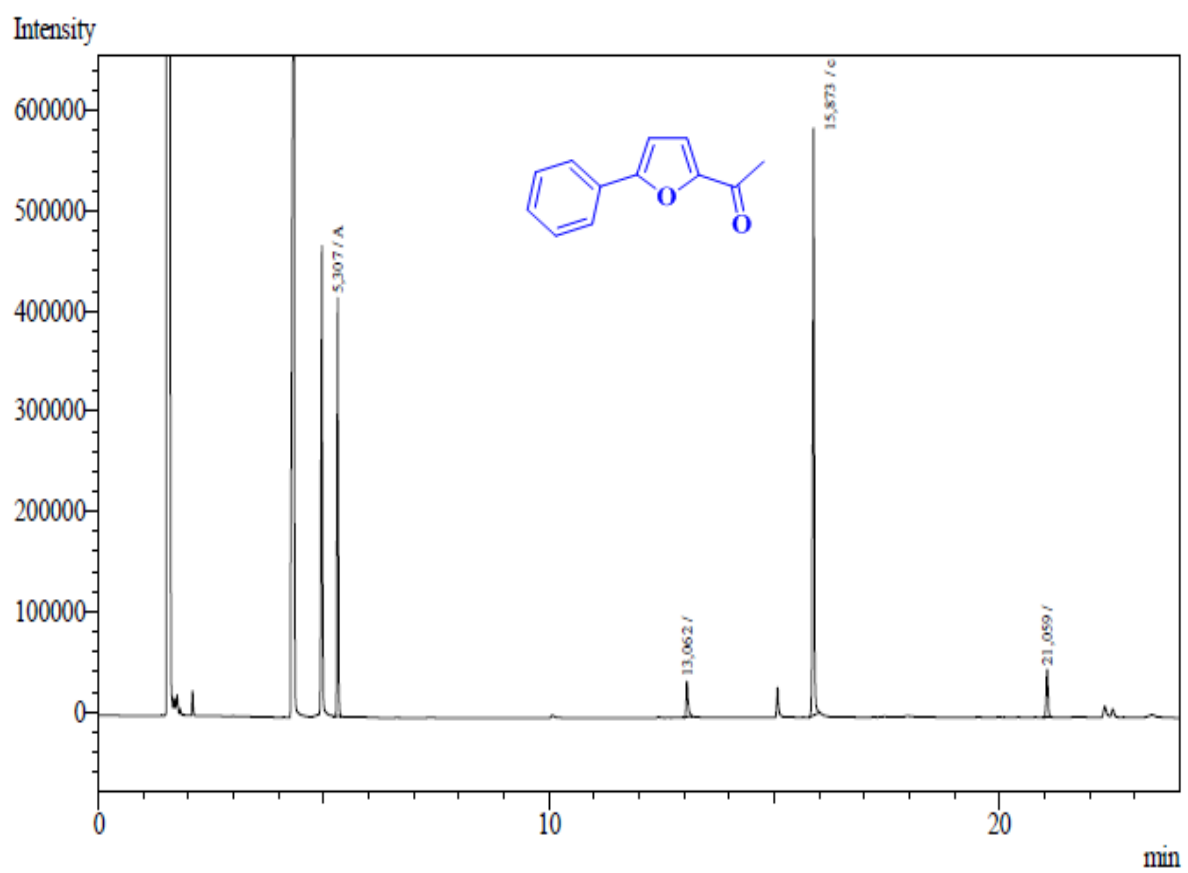

3g

Intensity

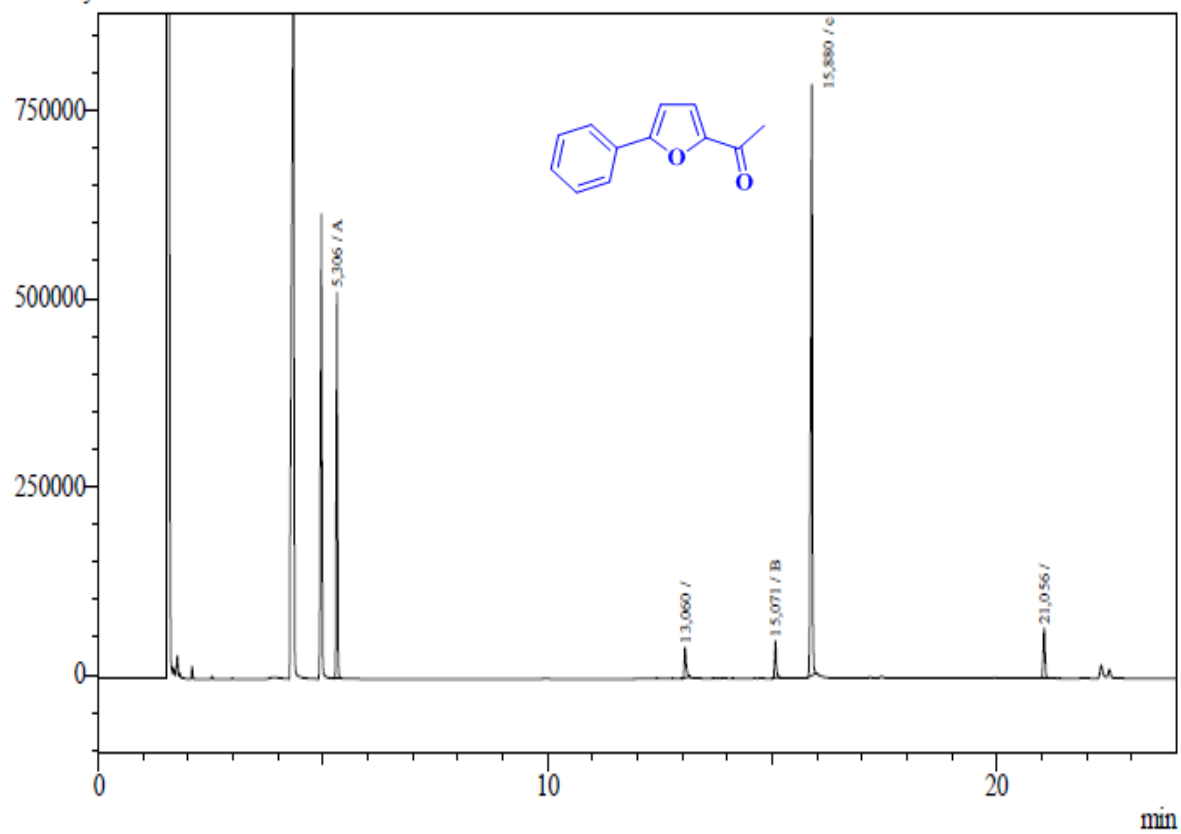

3h

Intensity

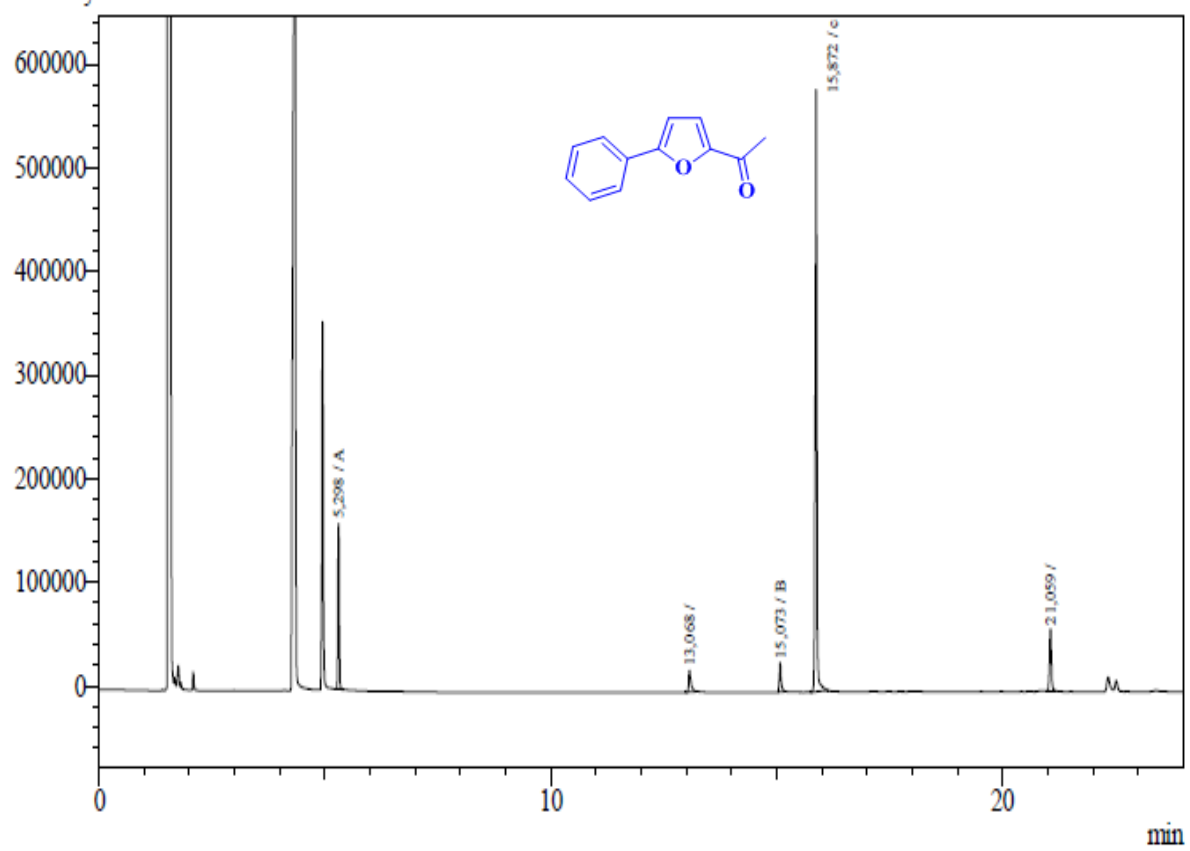

3i

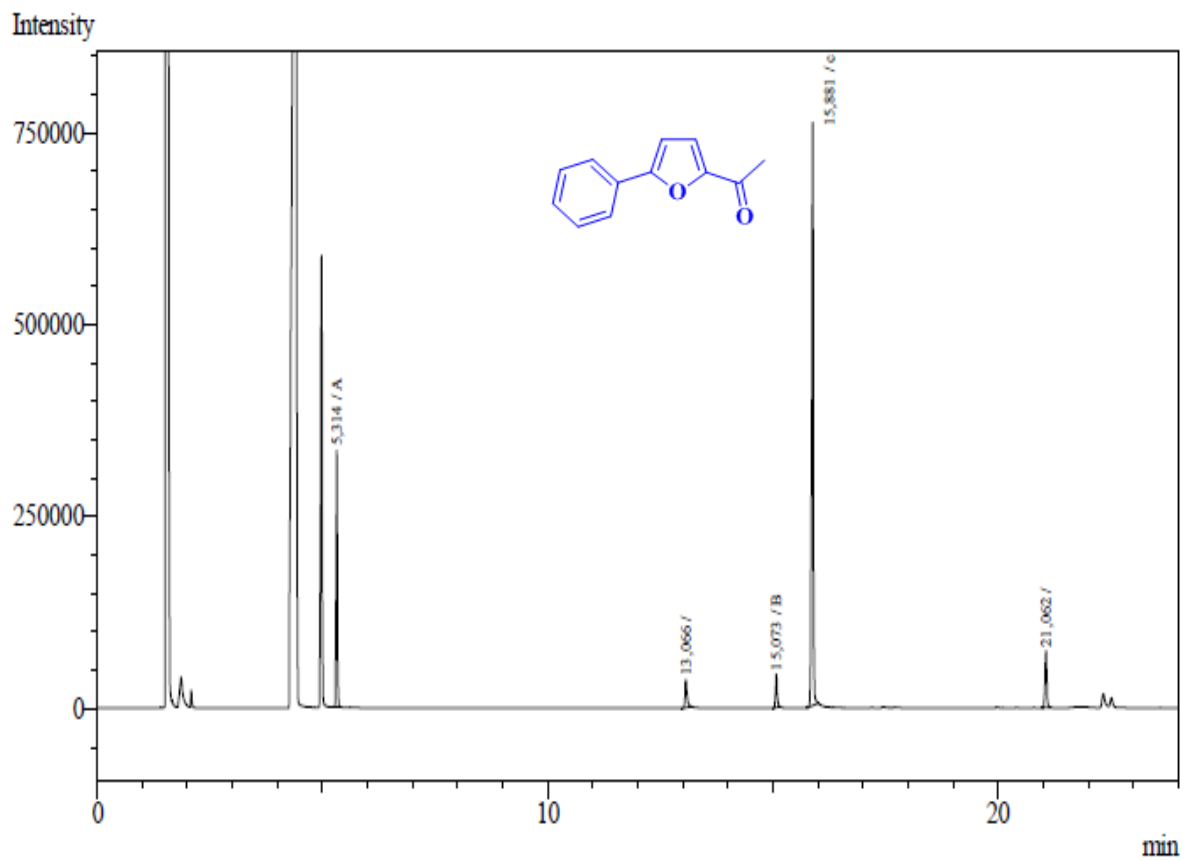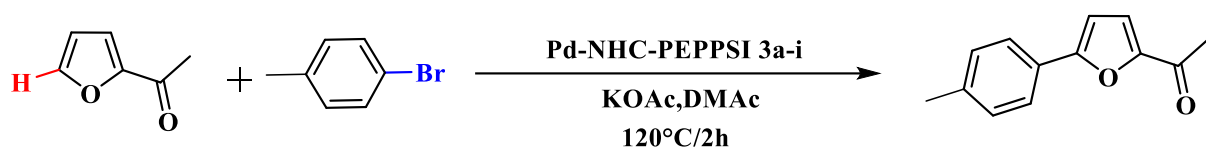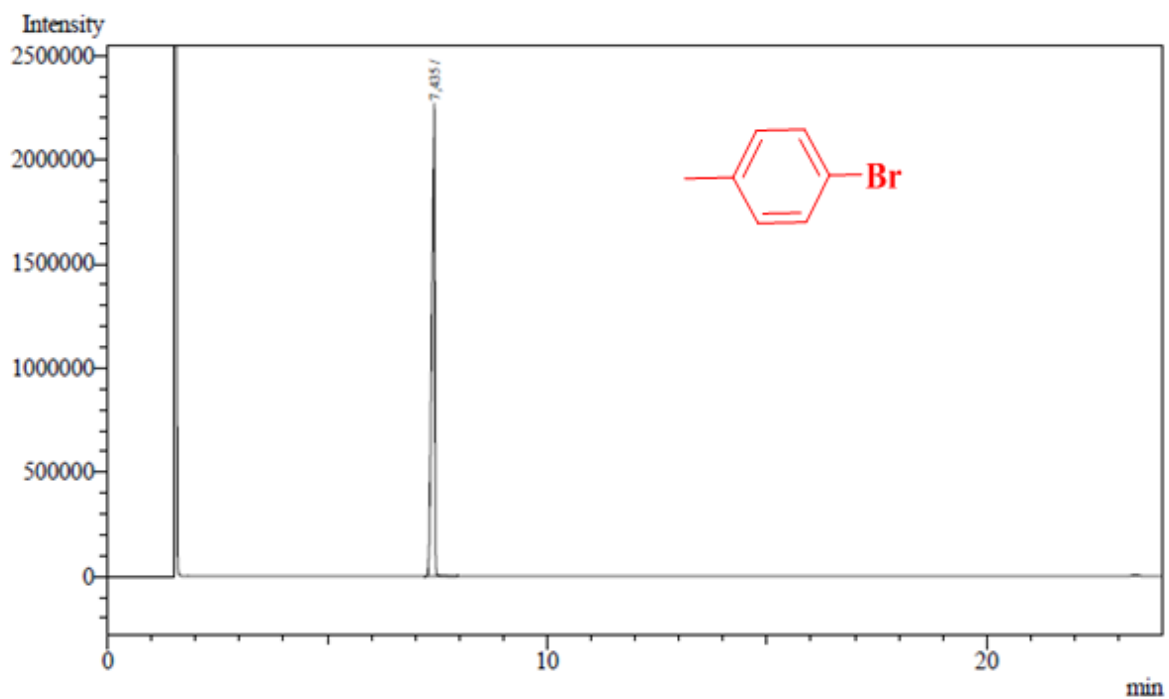

3a

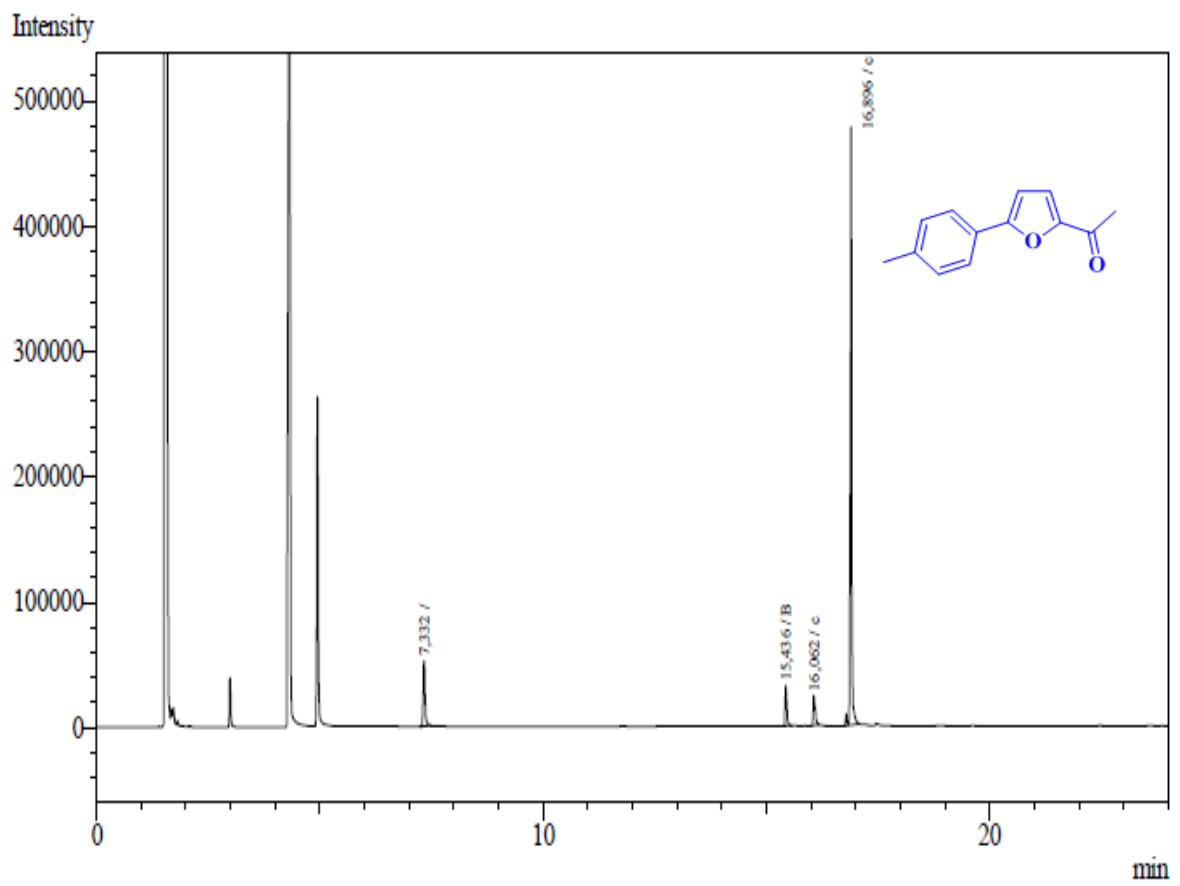

3b

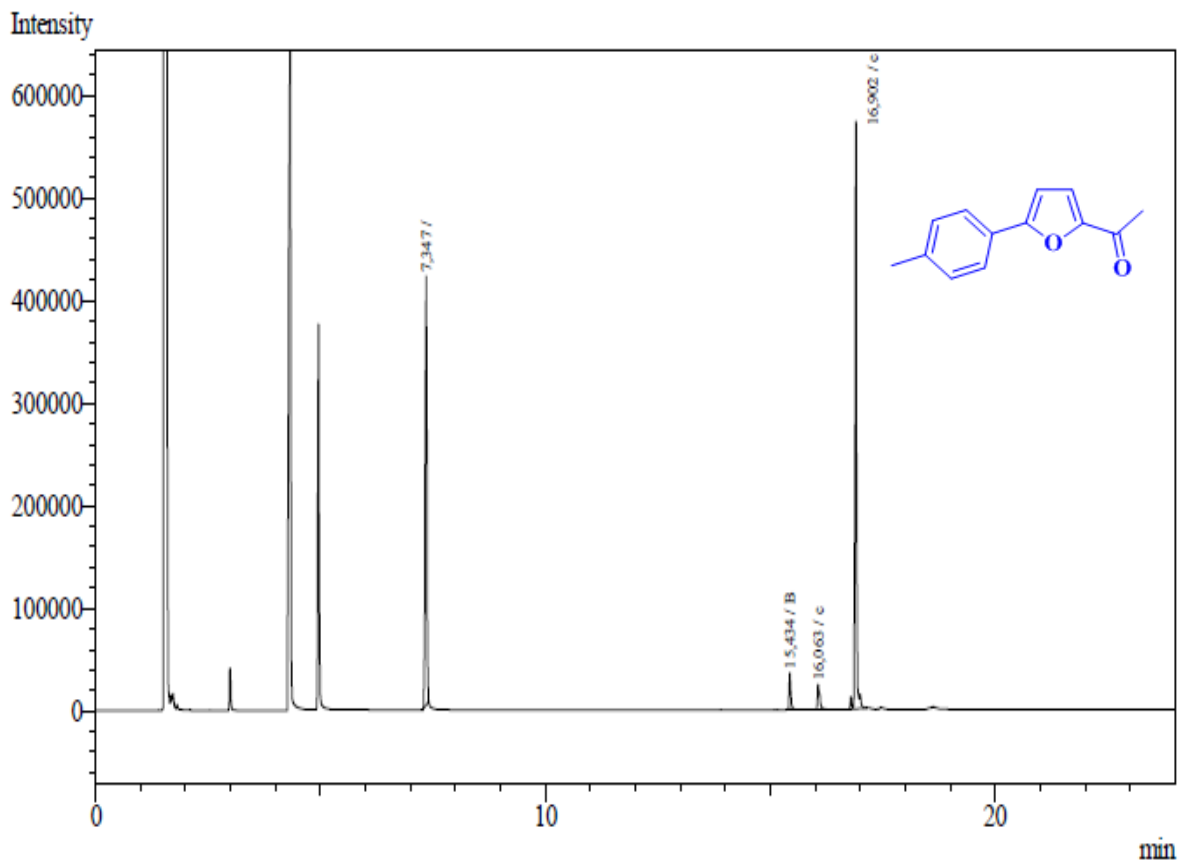

3c

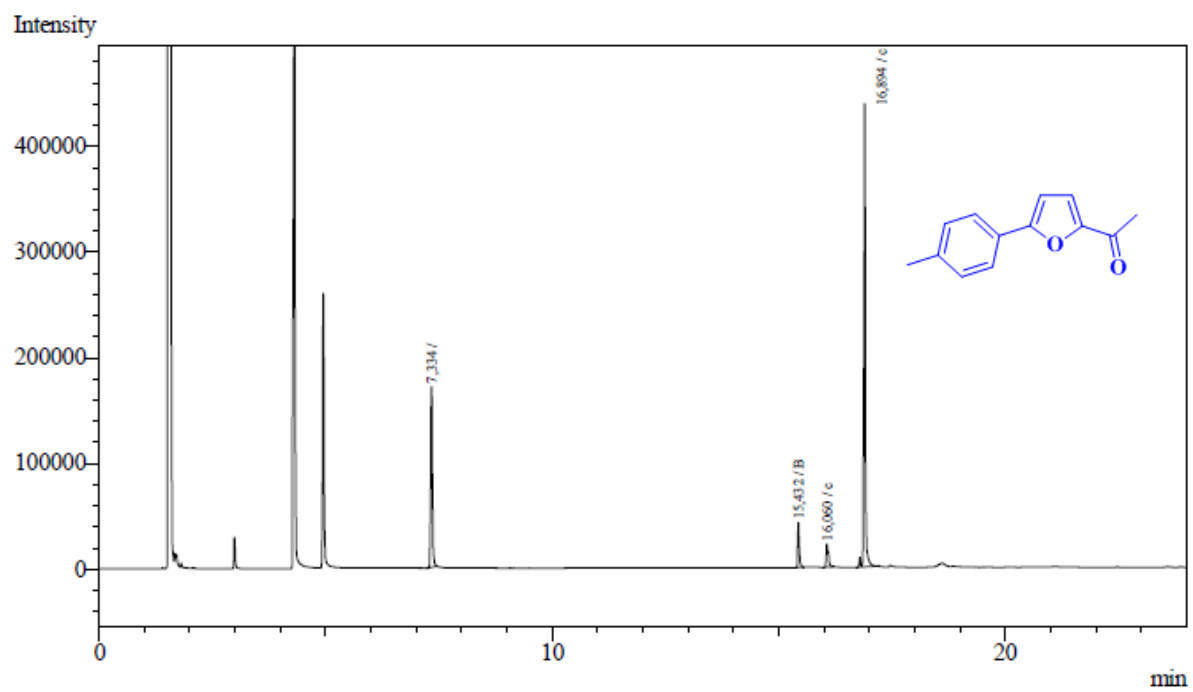

3d

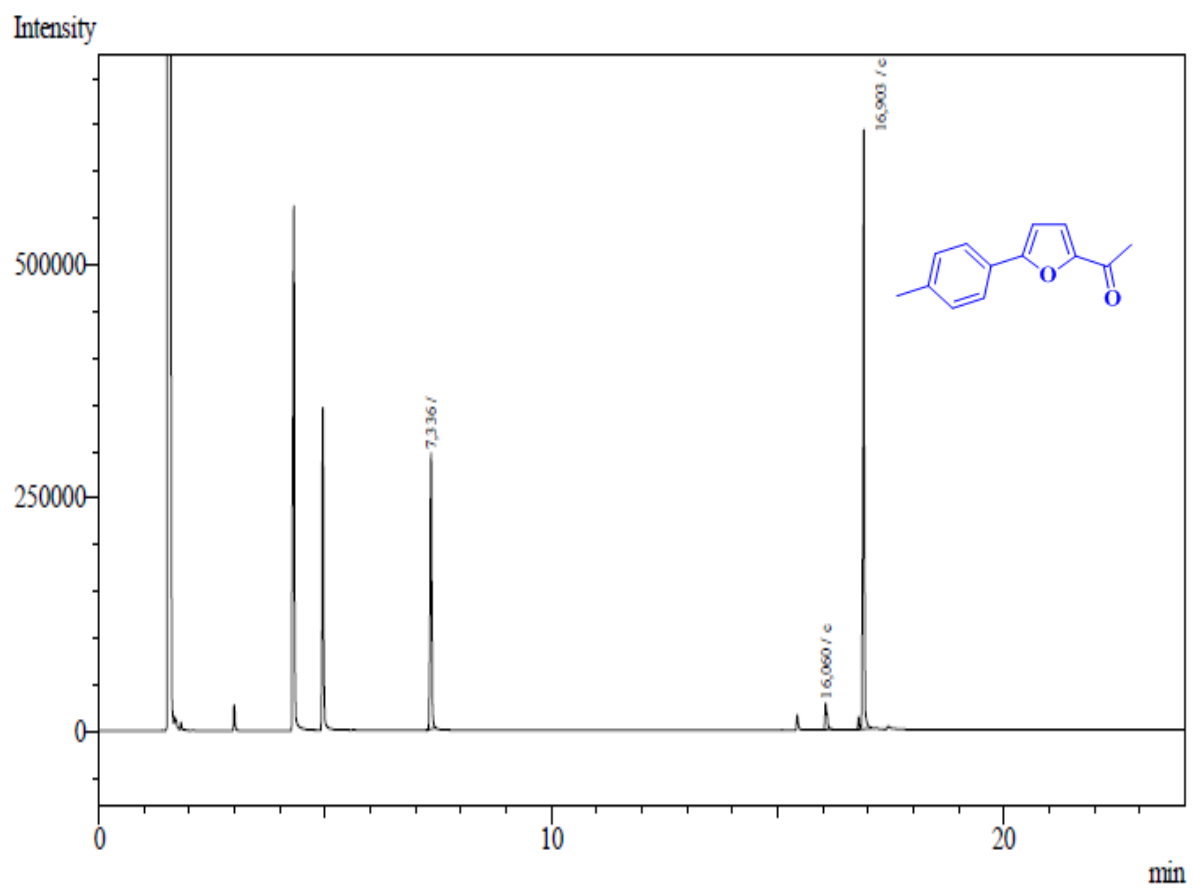

3e

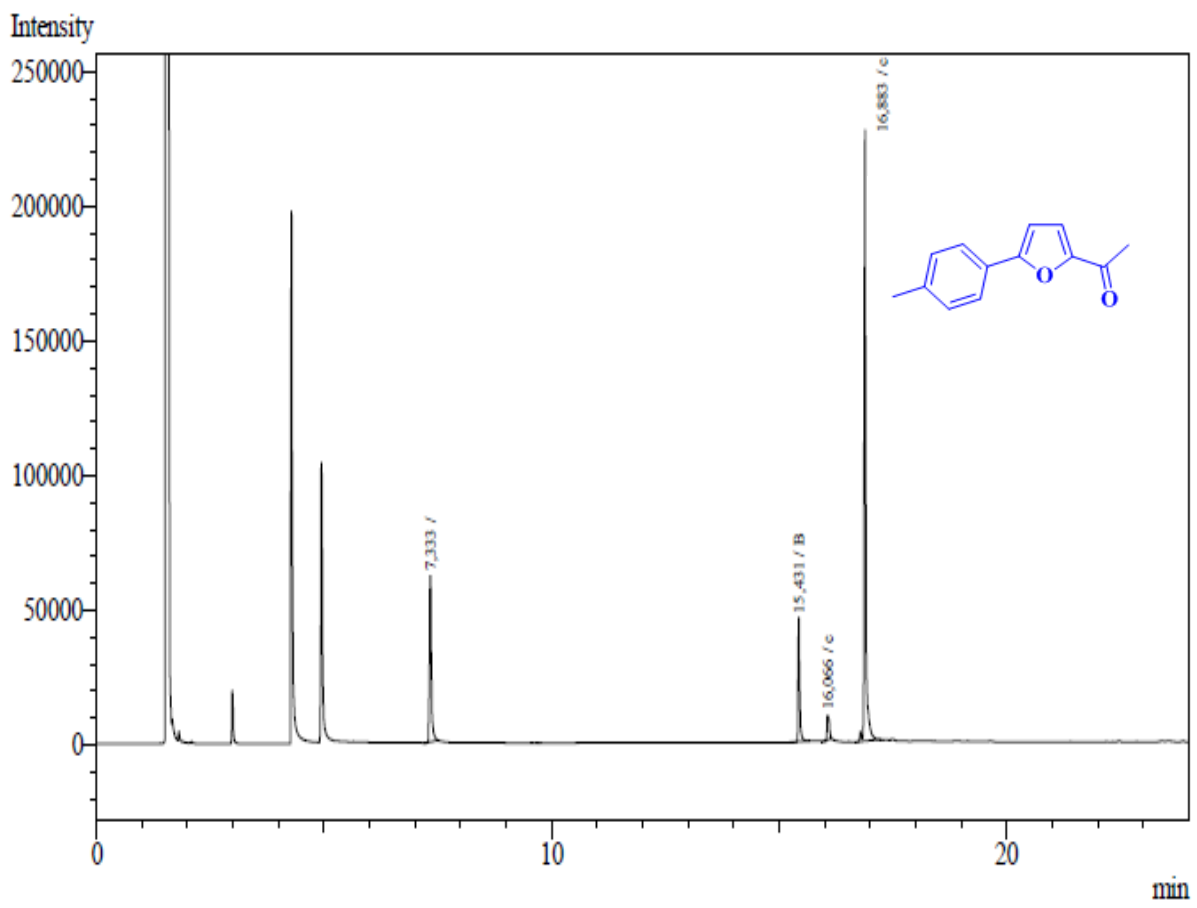

3f

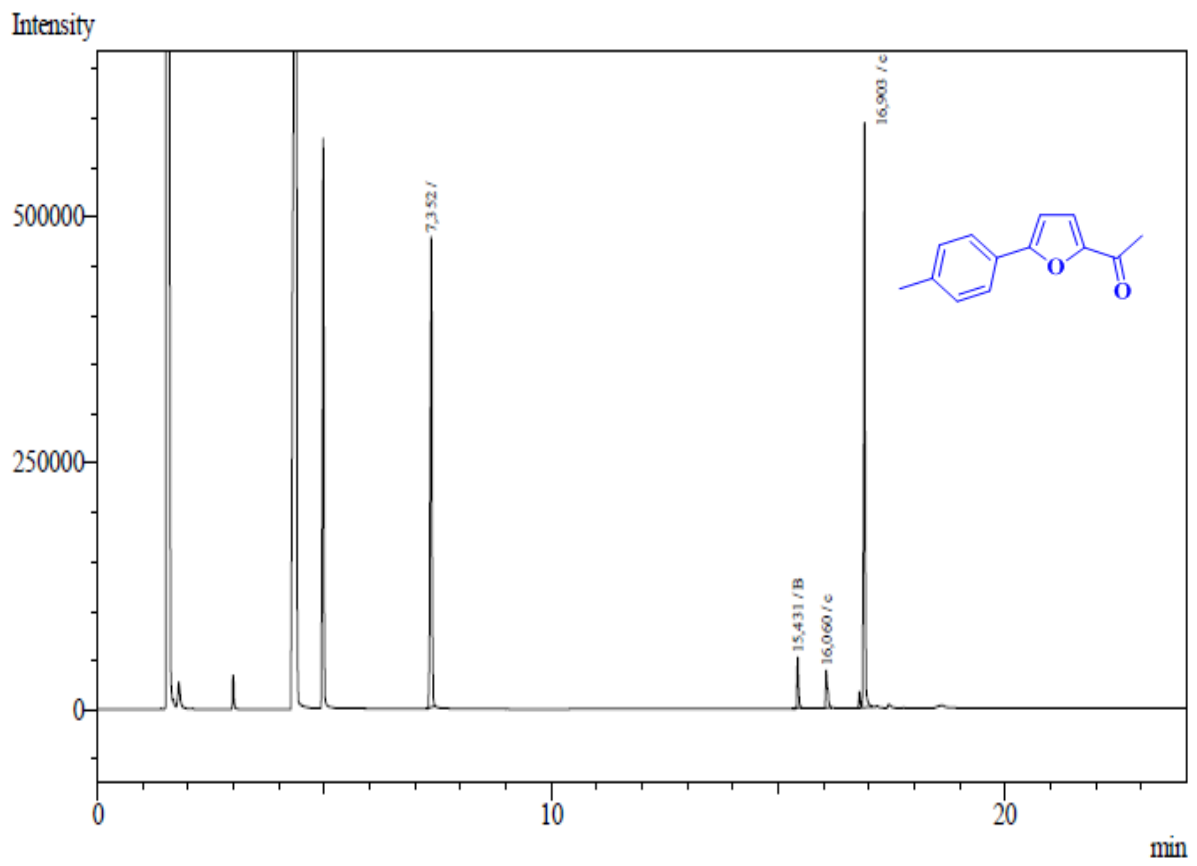

3g

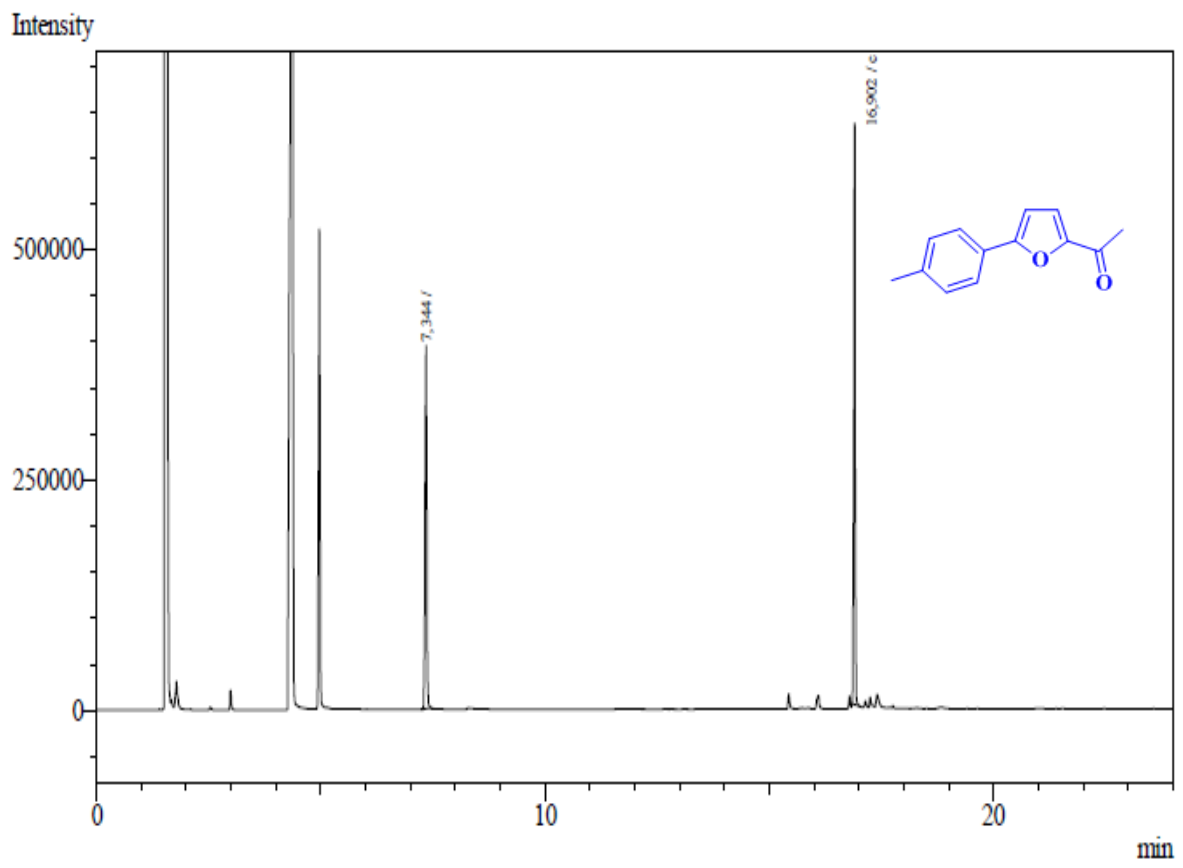

3h

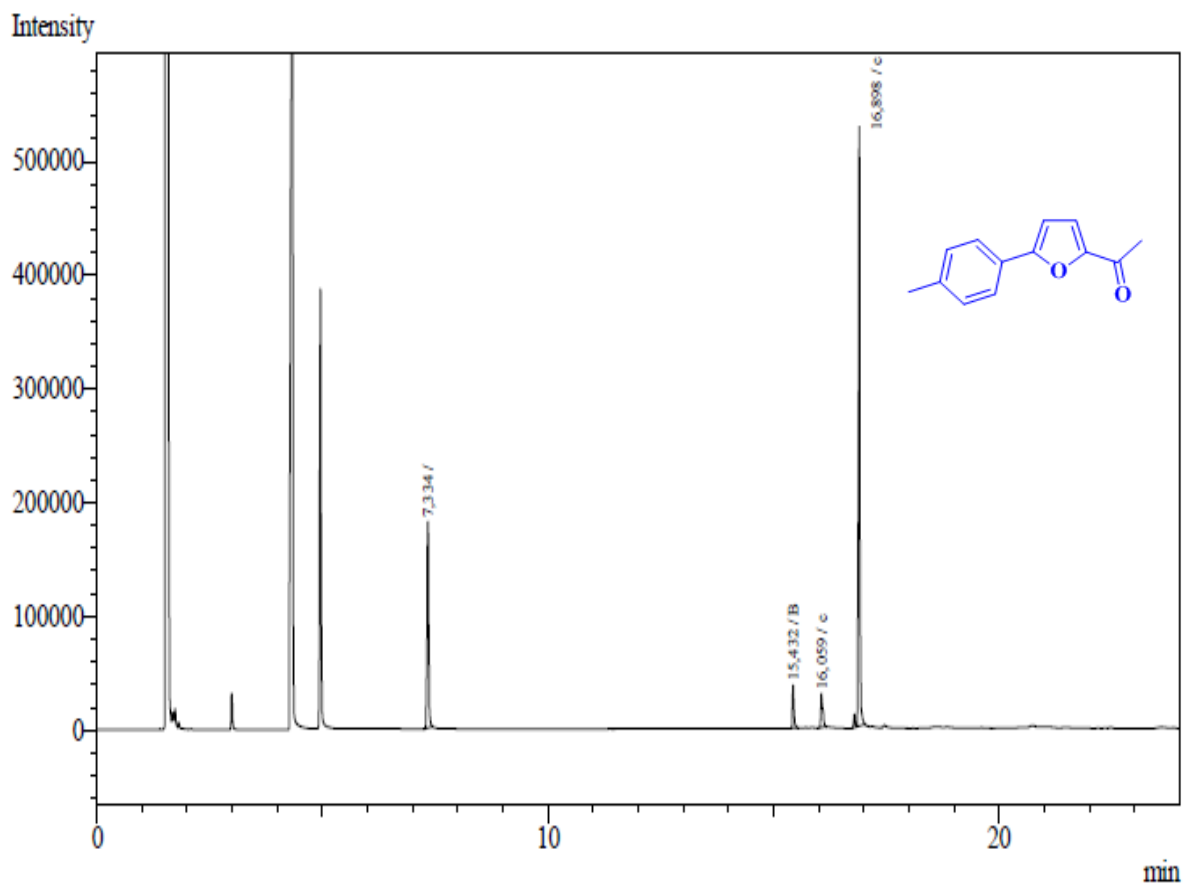

3i



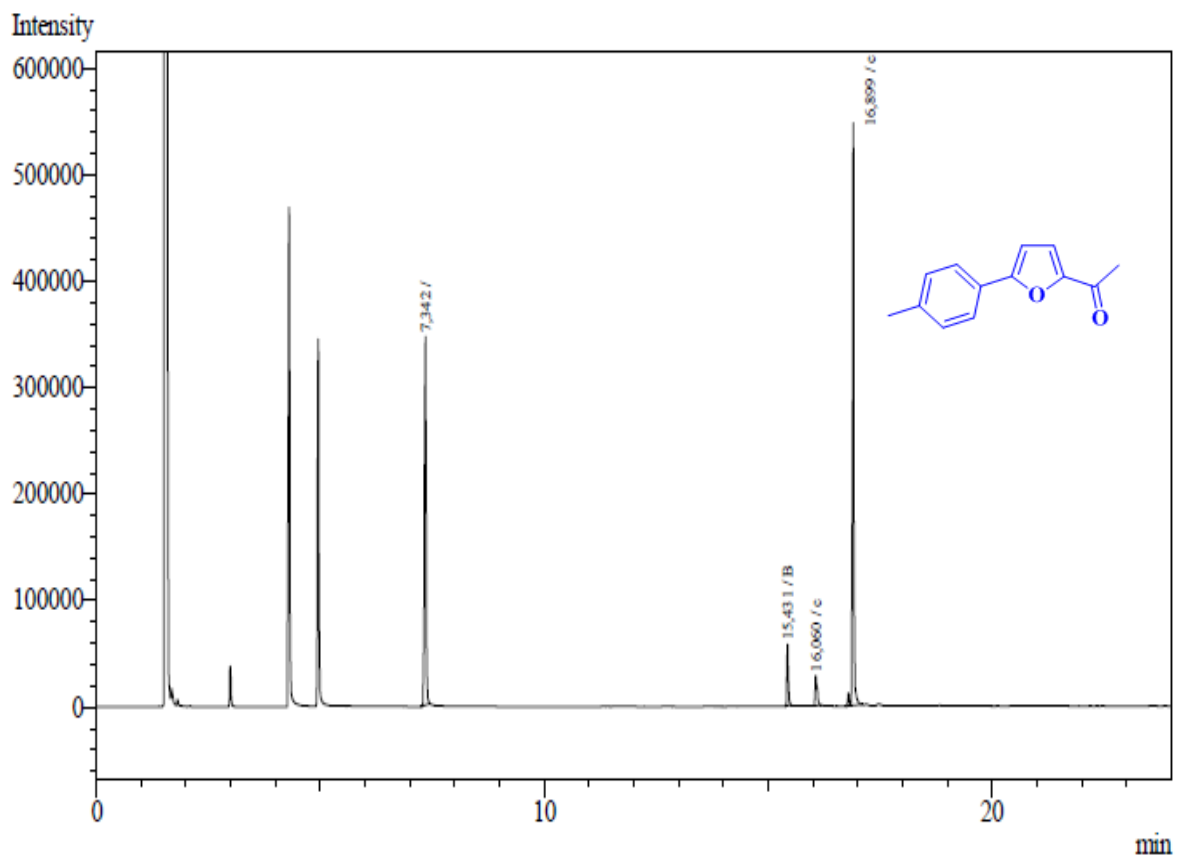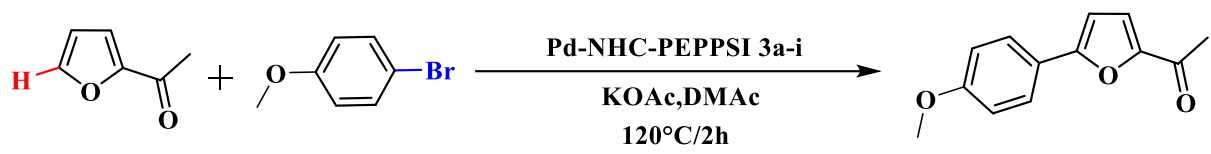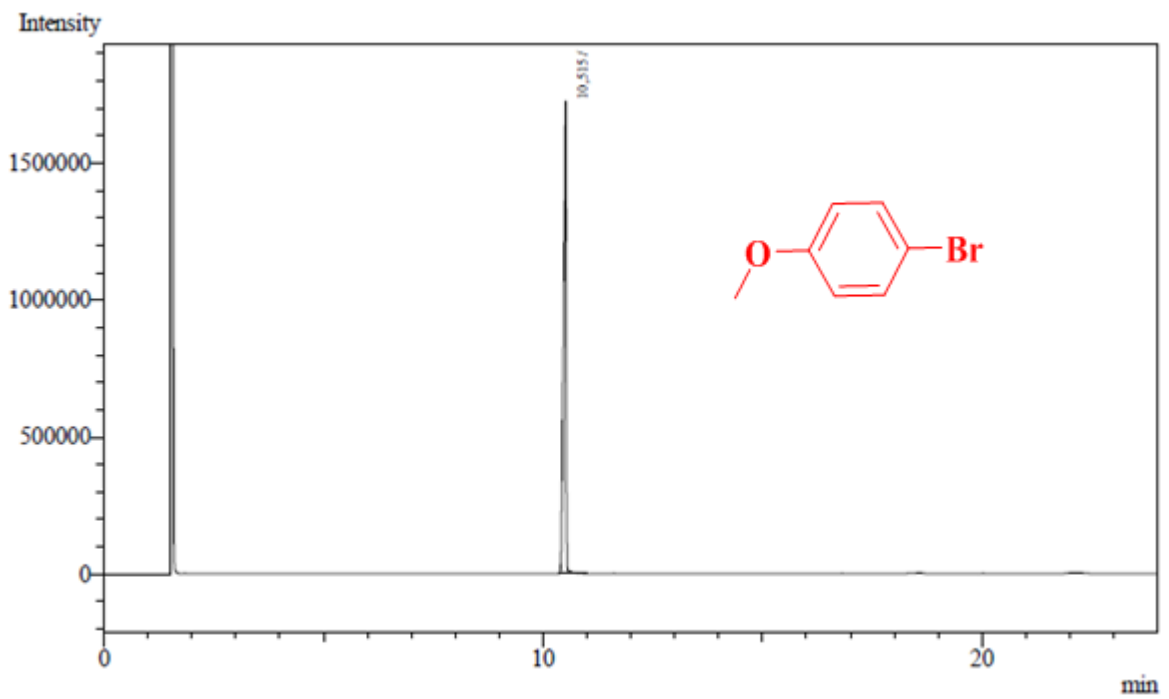

3a

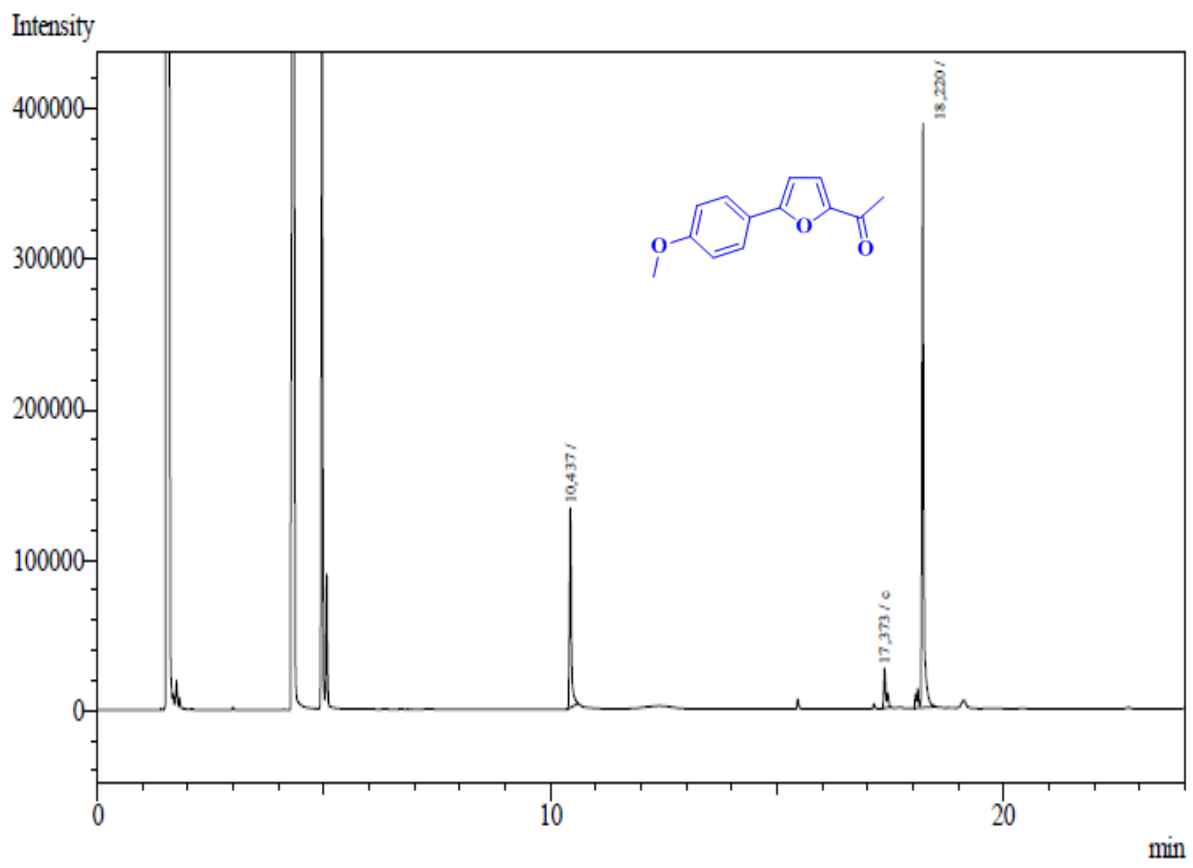

3b

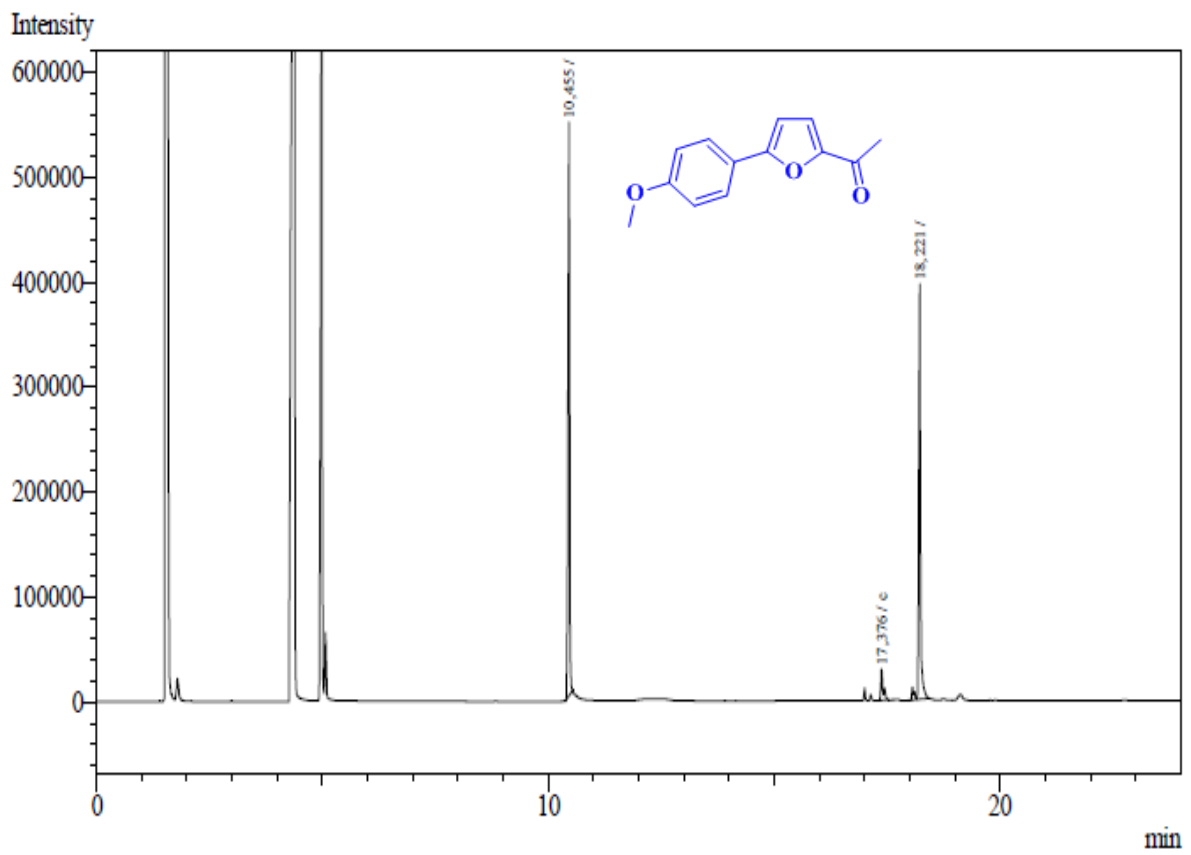

3c

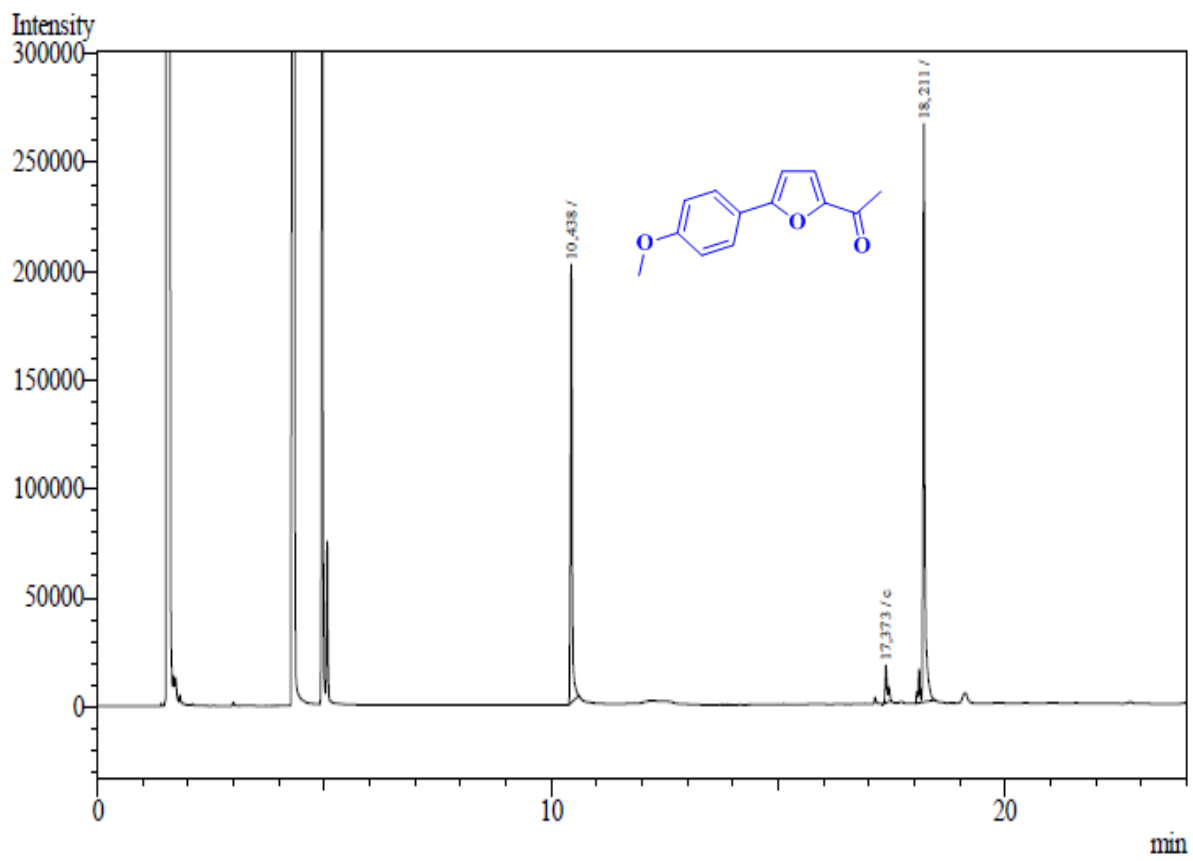

3d

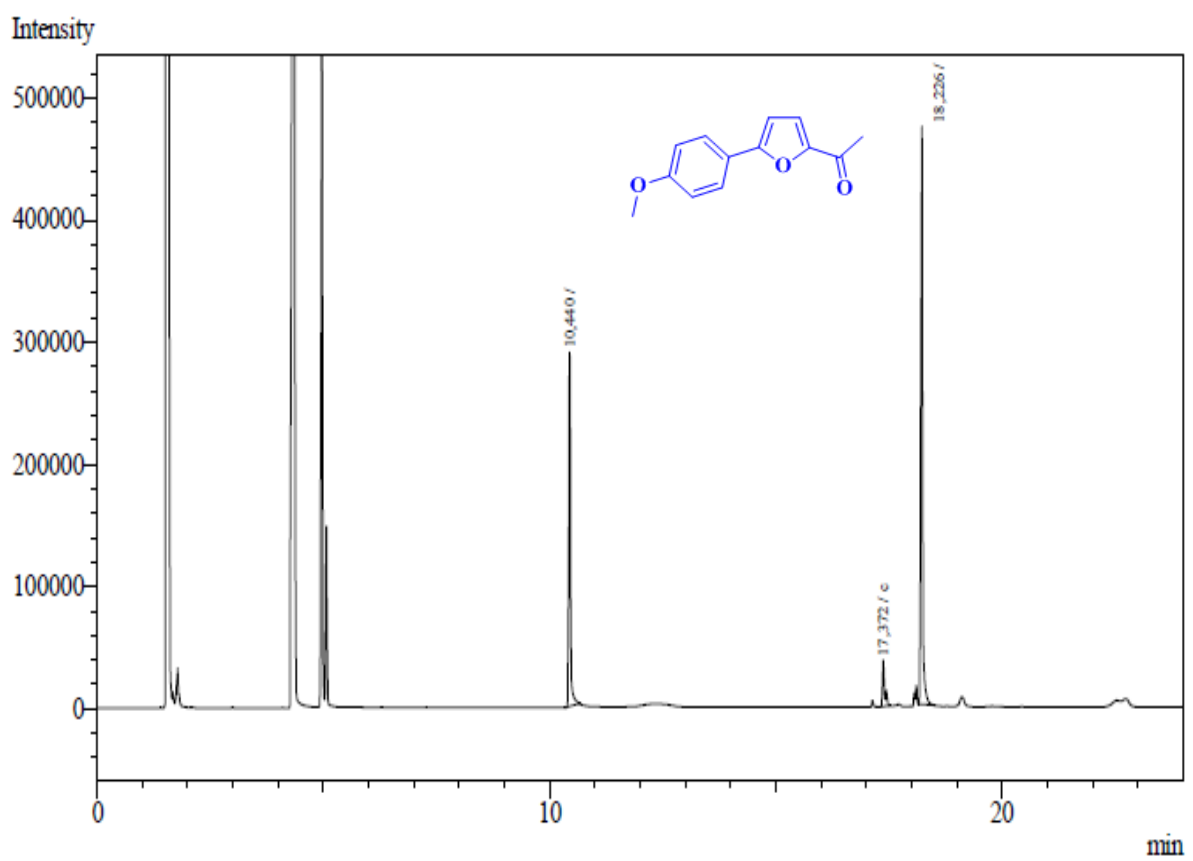

3e

Intensity

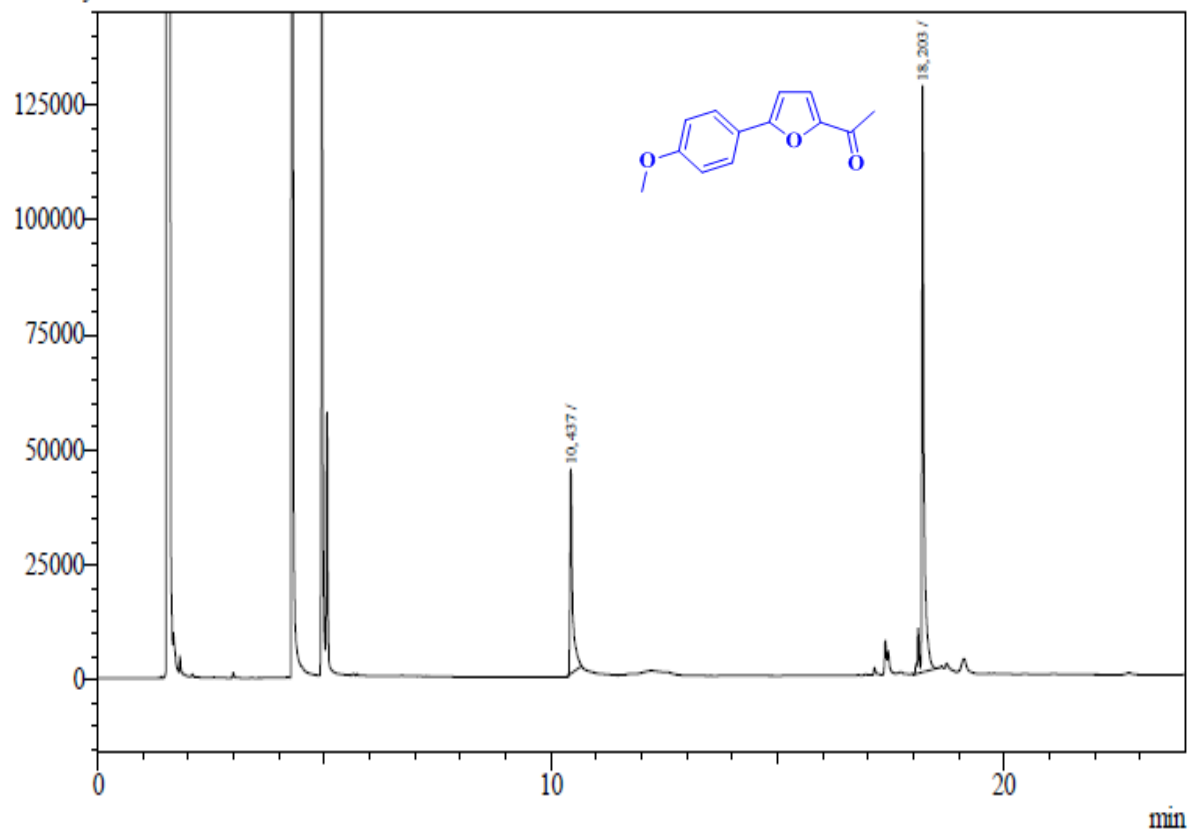

3f

Intensity

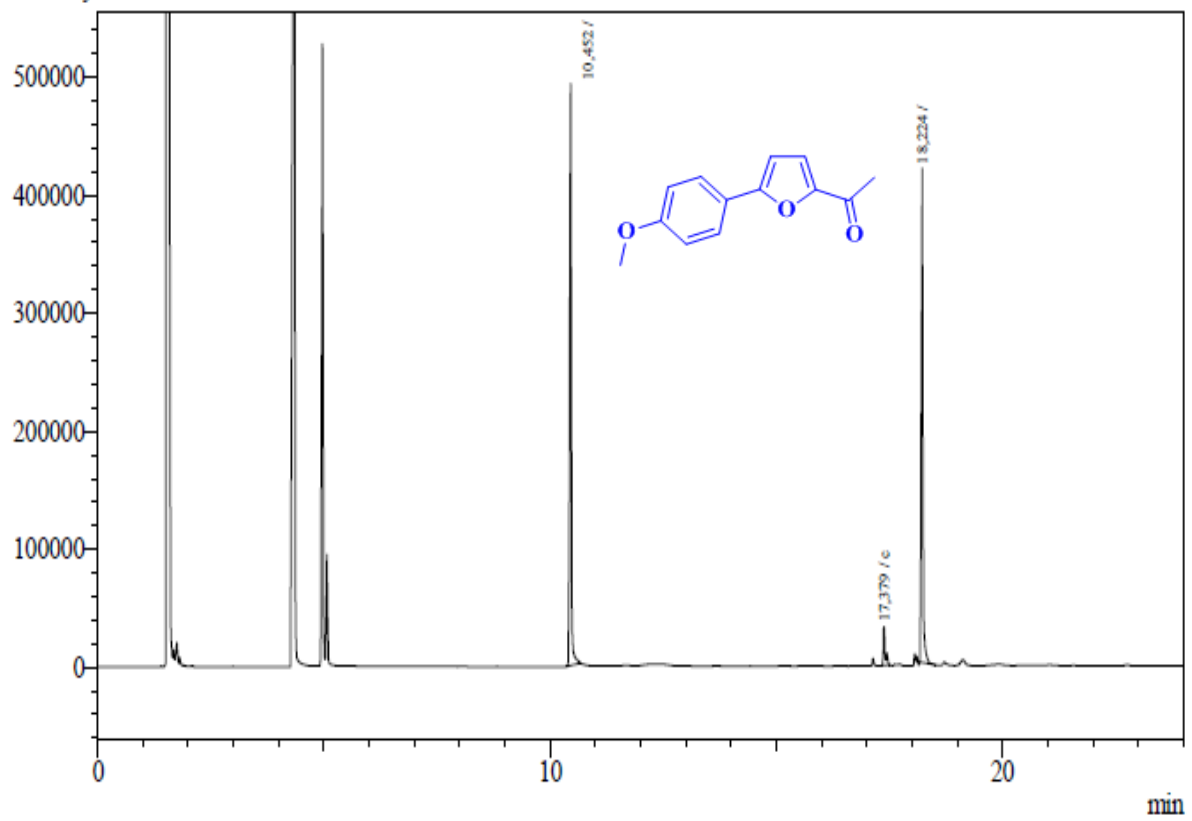

3g

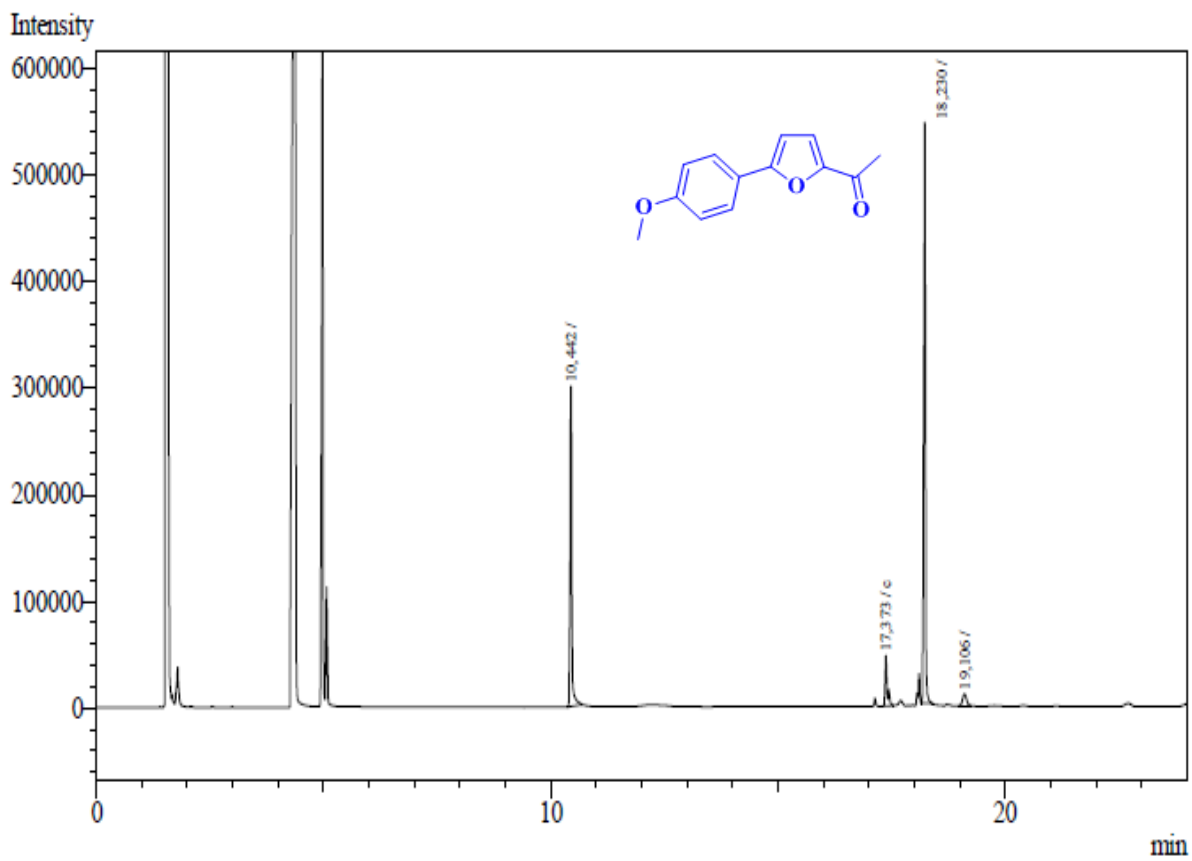

3h

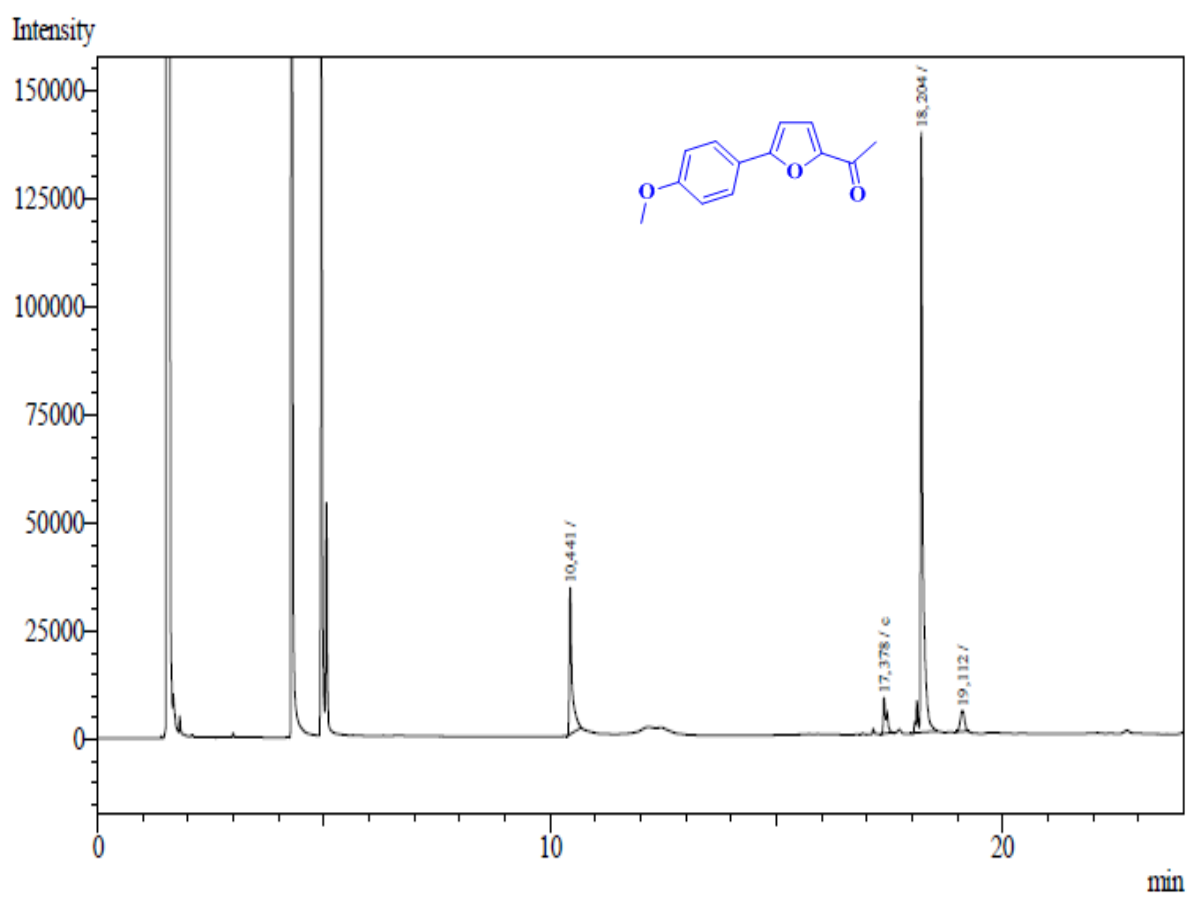

3i

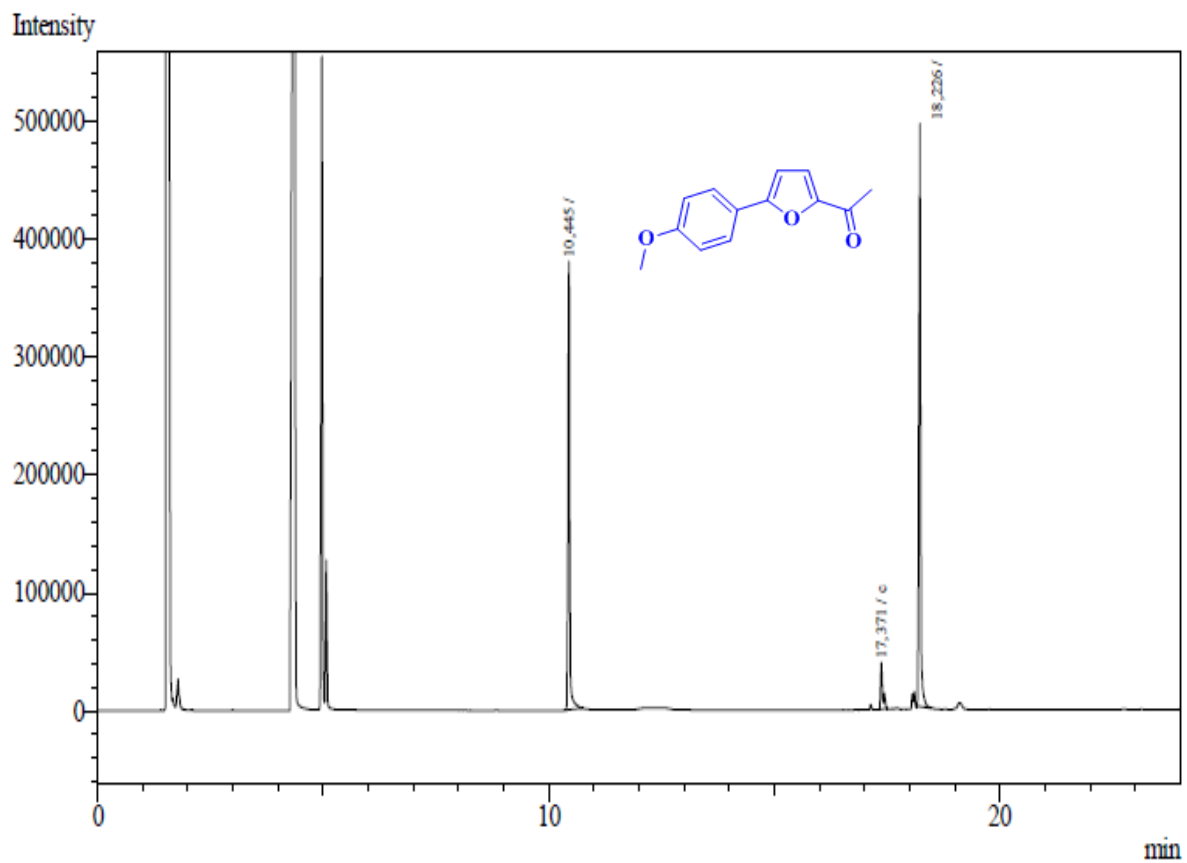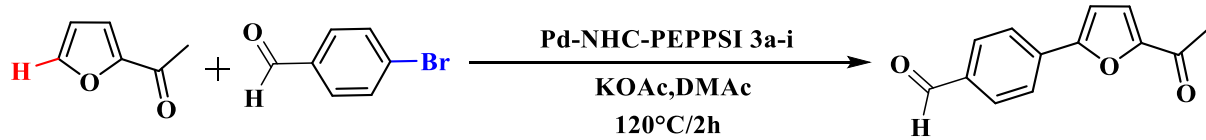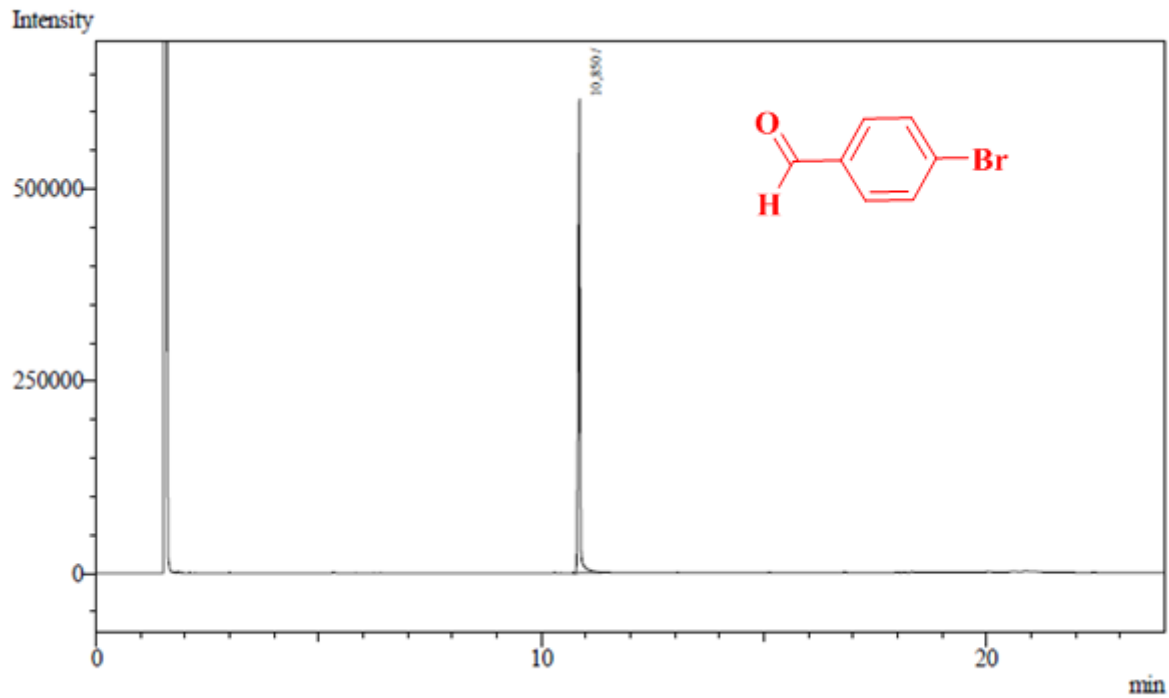

3a

Intensity

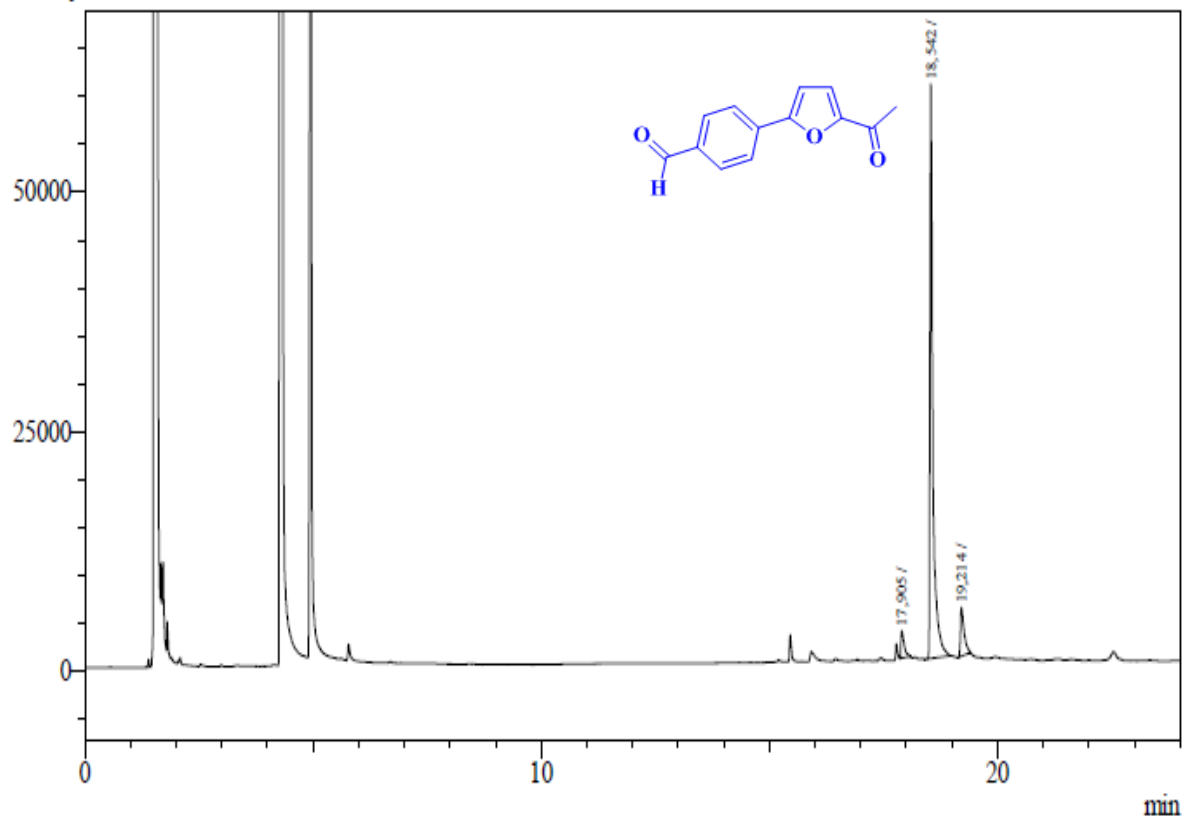

3b

Intensity

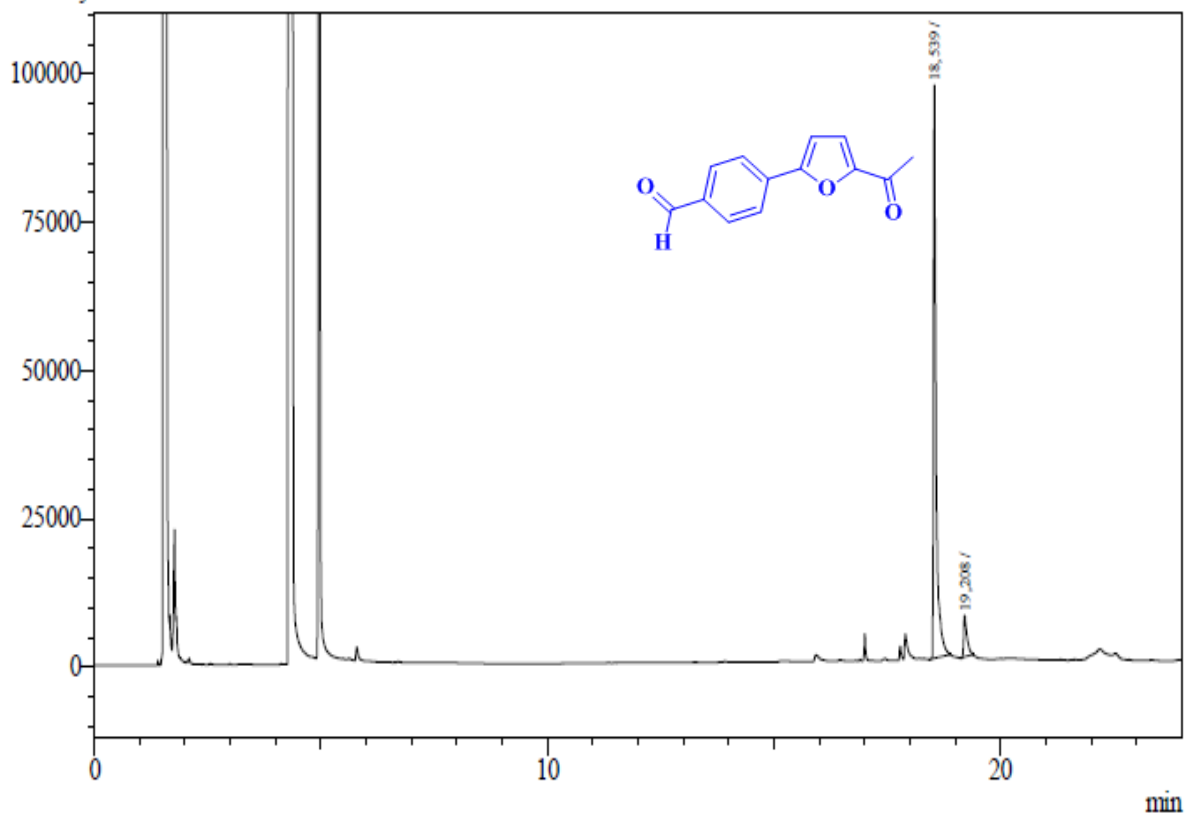

3c

Intensity

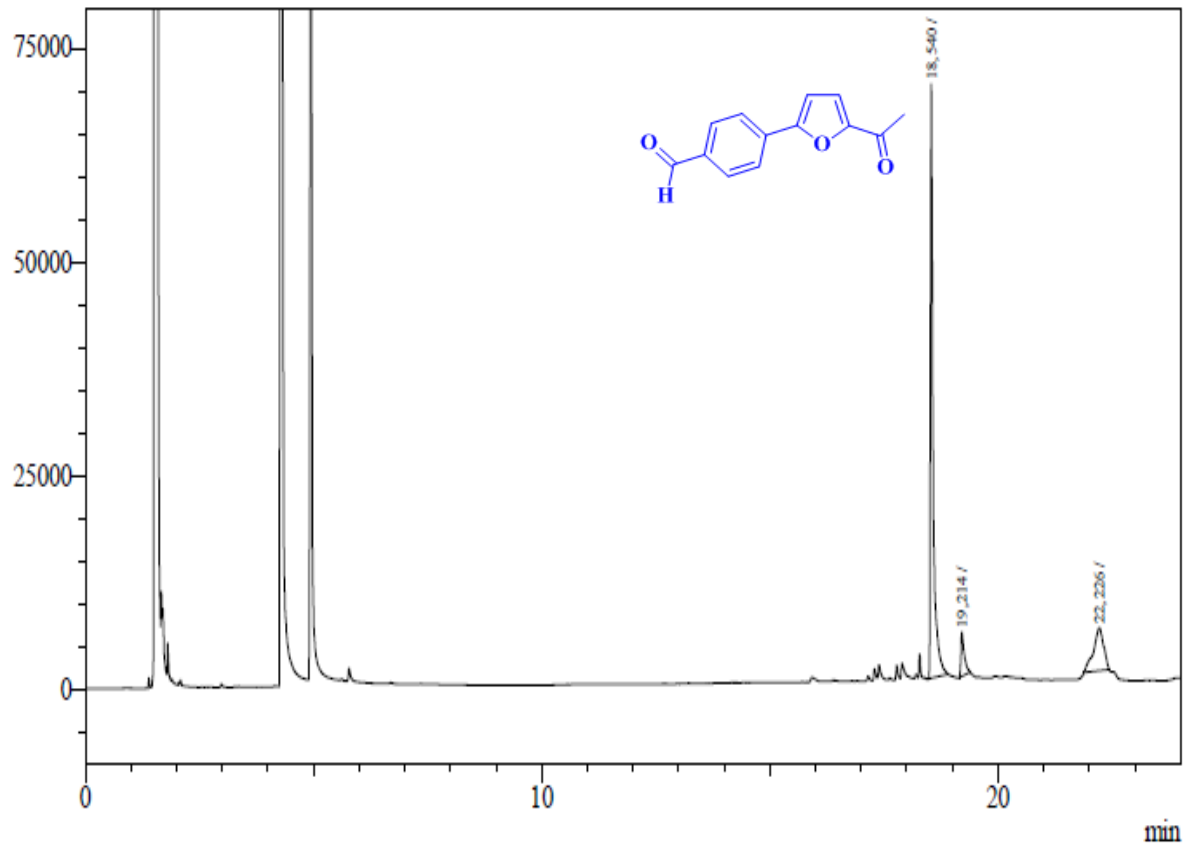

3d

Intensity

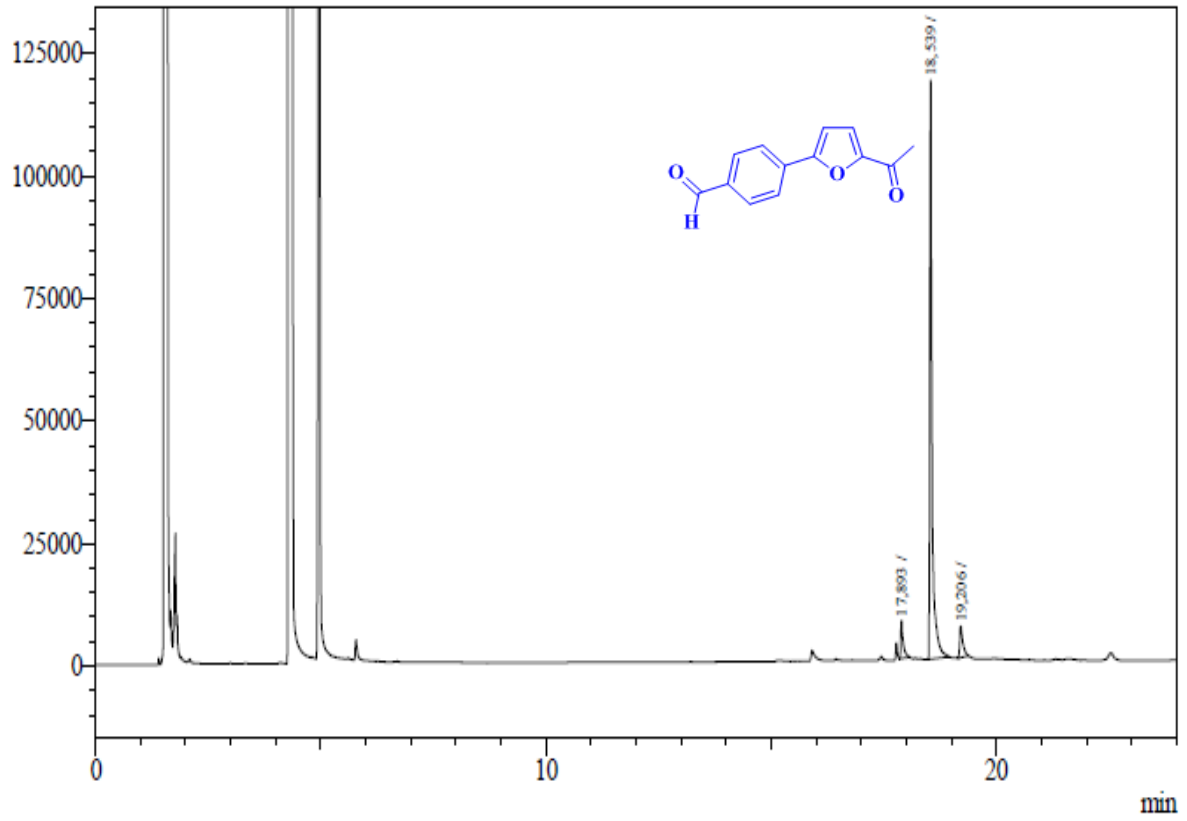

3e



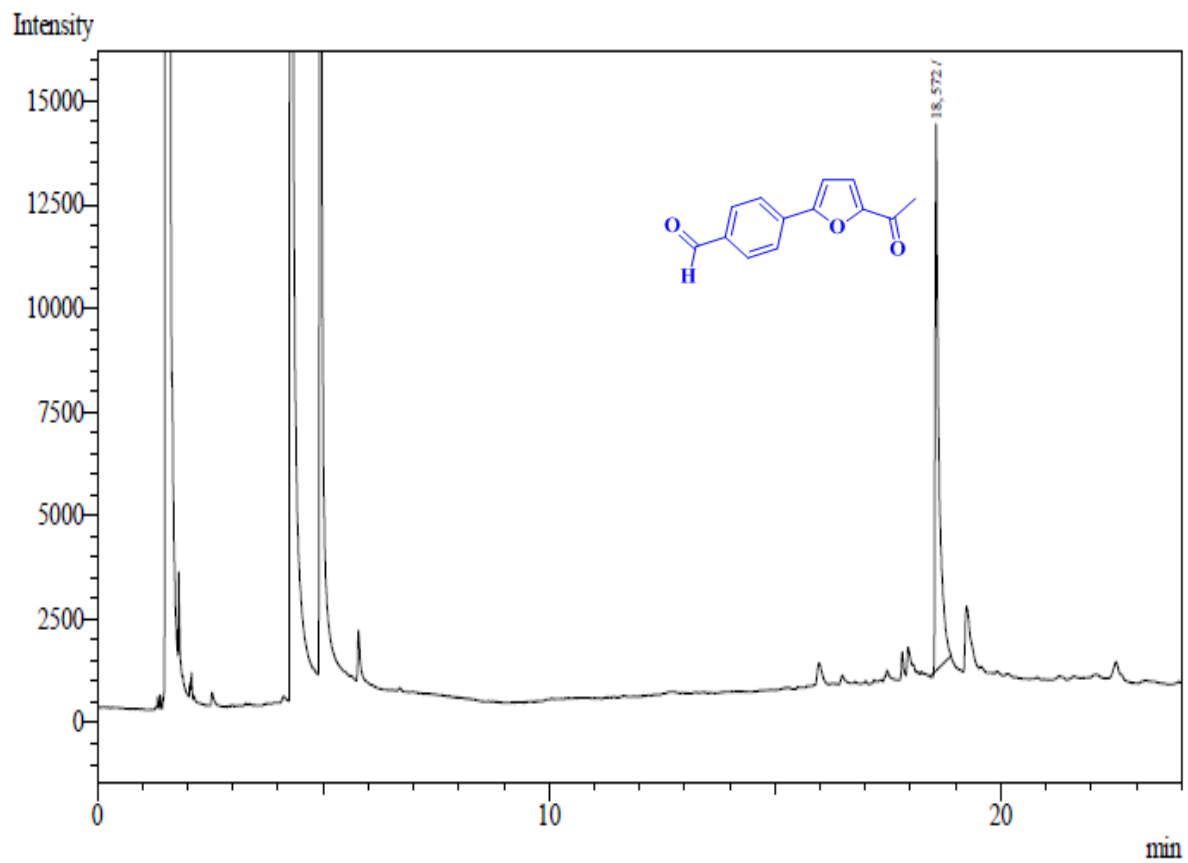

3f

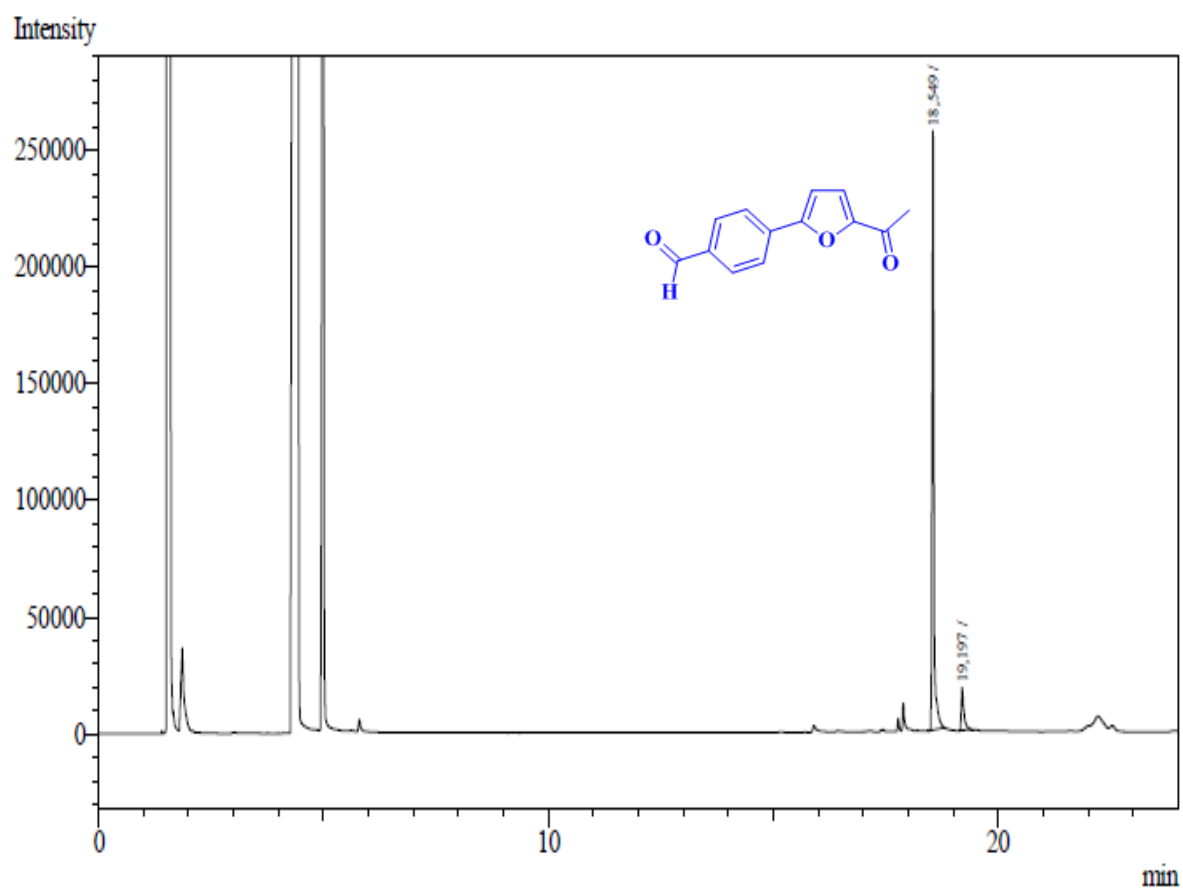

3g

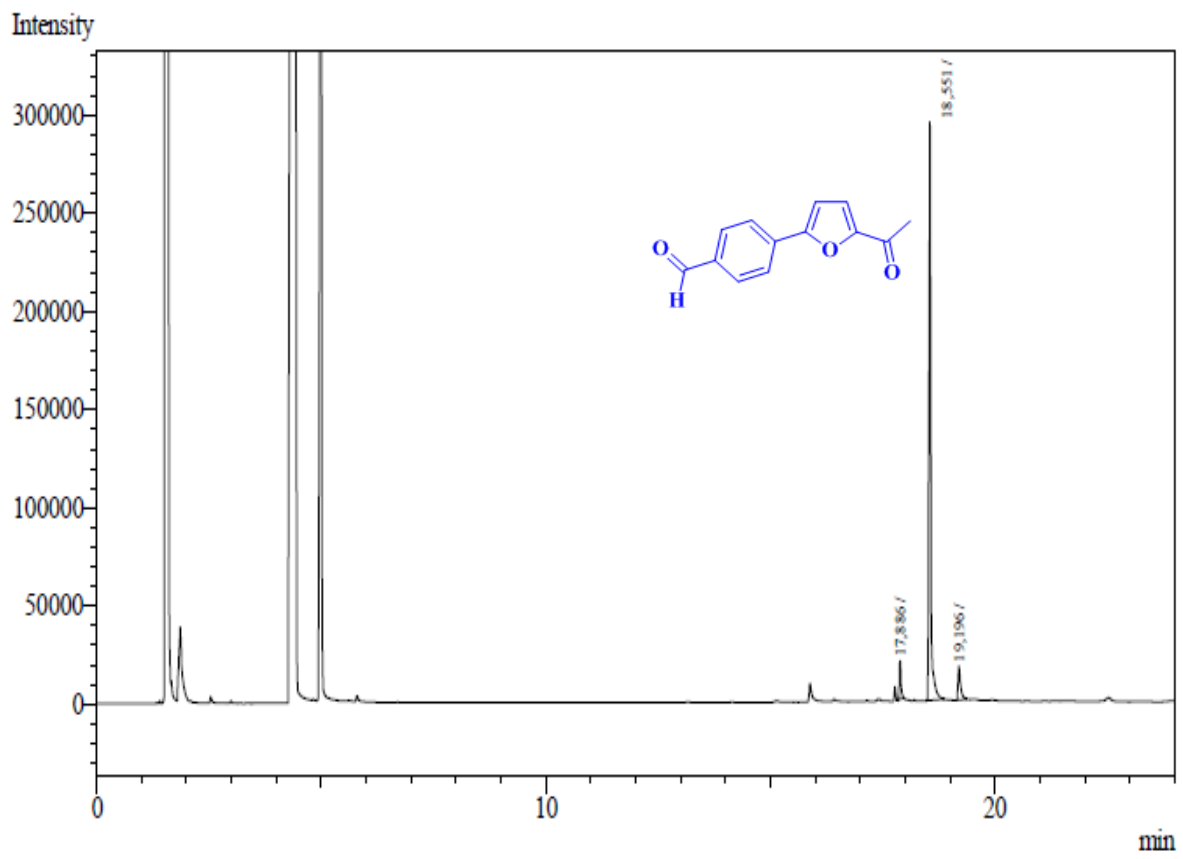

3h

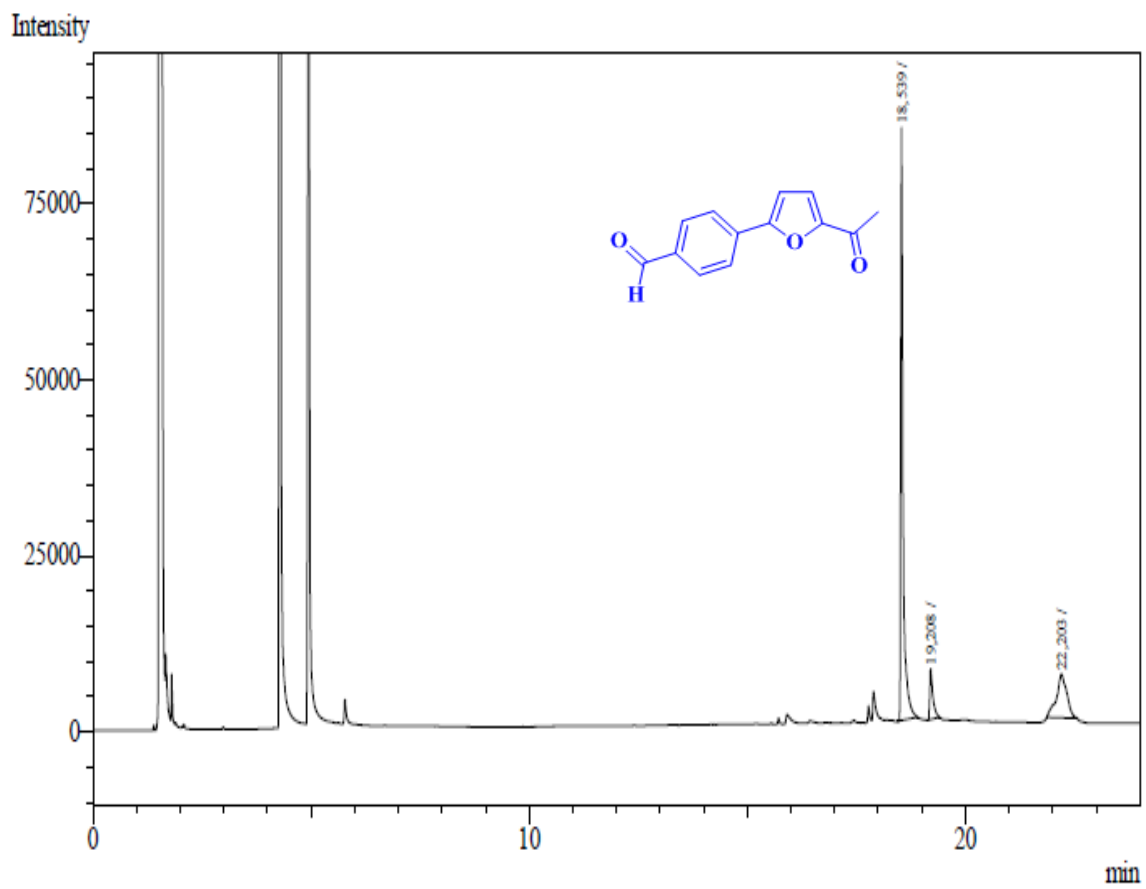

3i

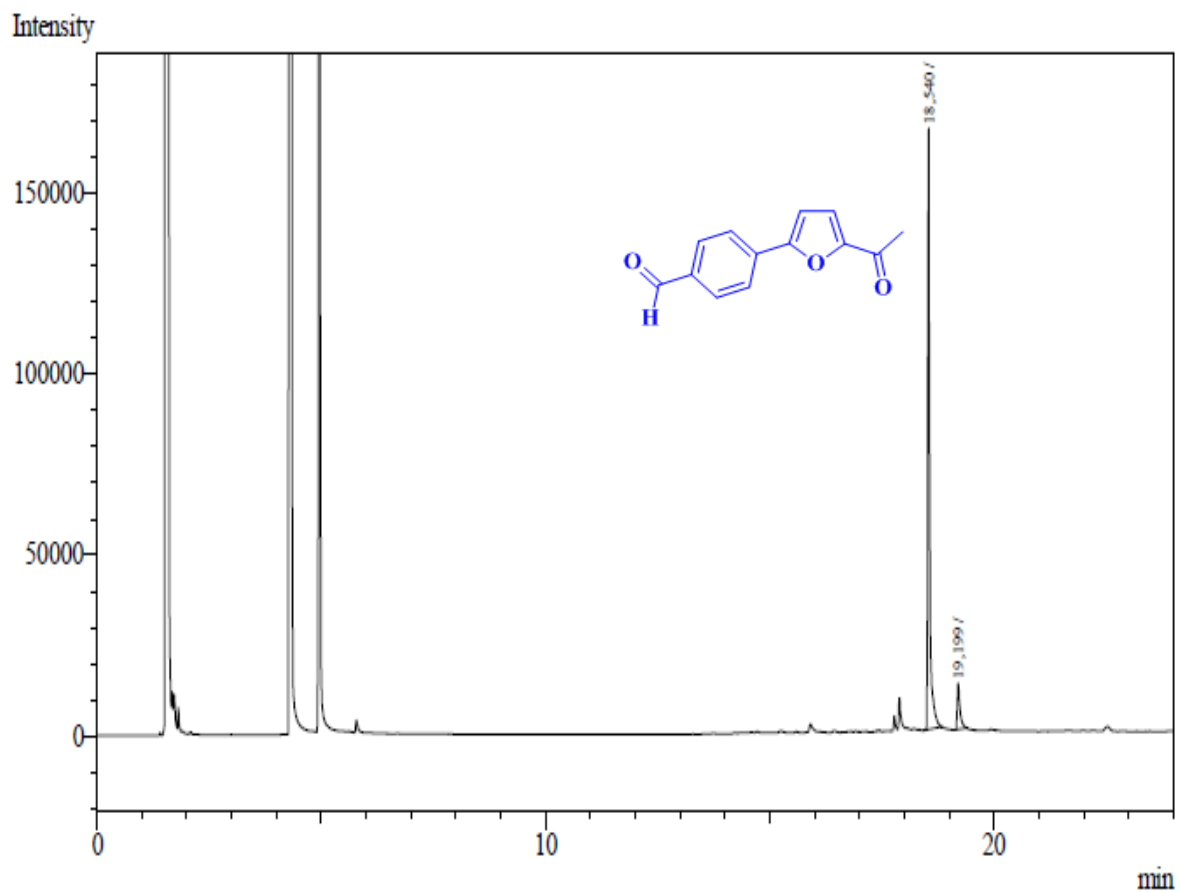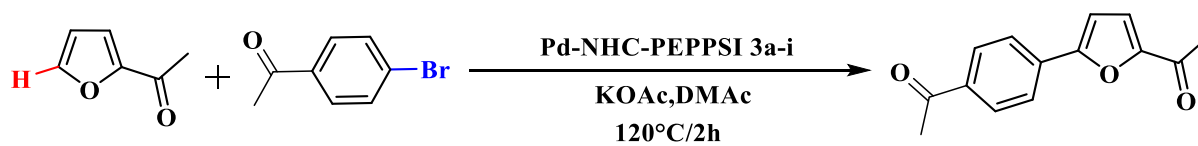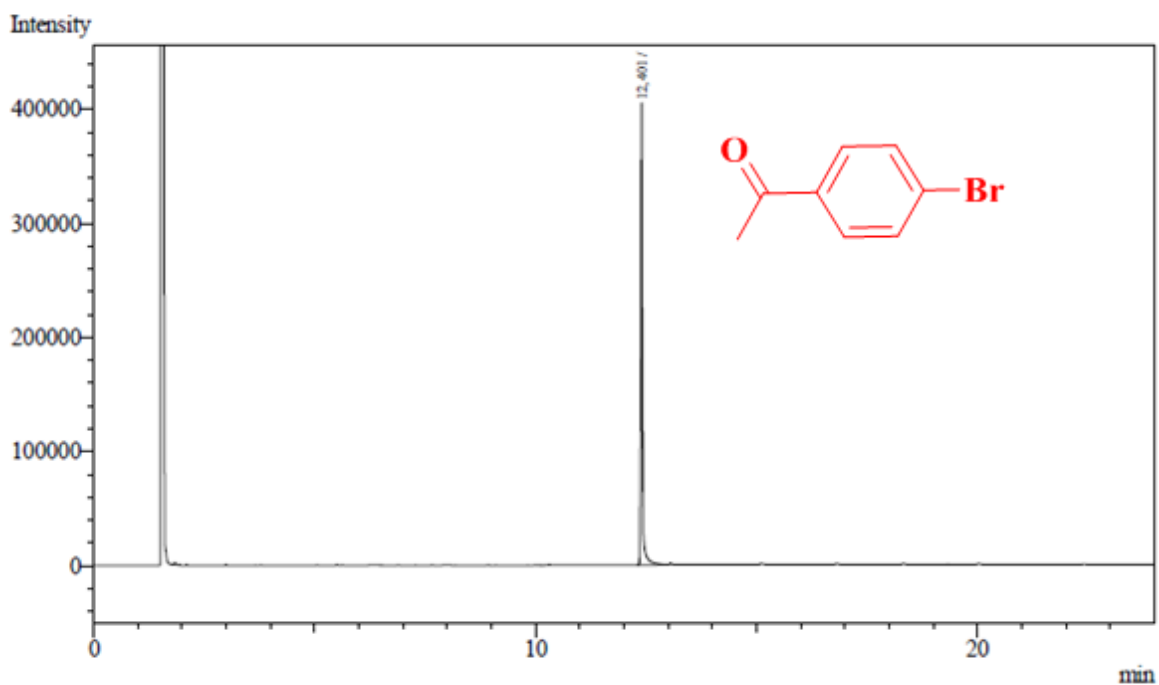

3a

Intensity

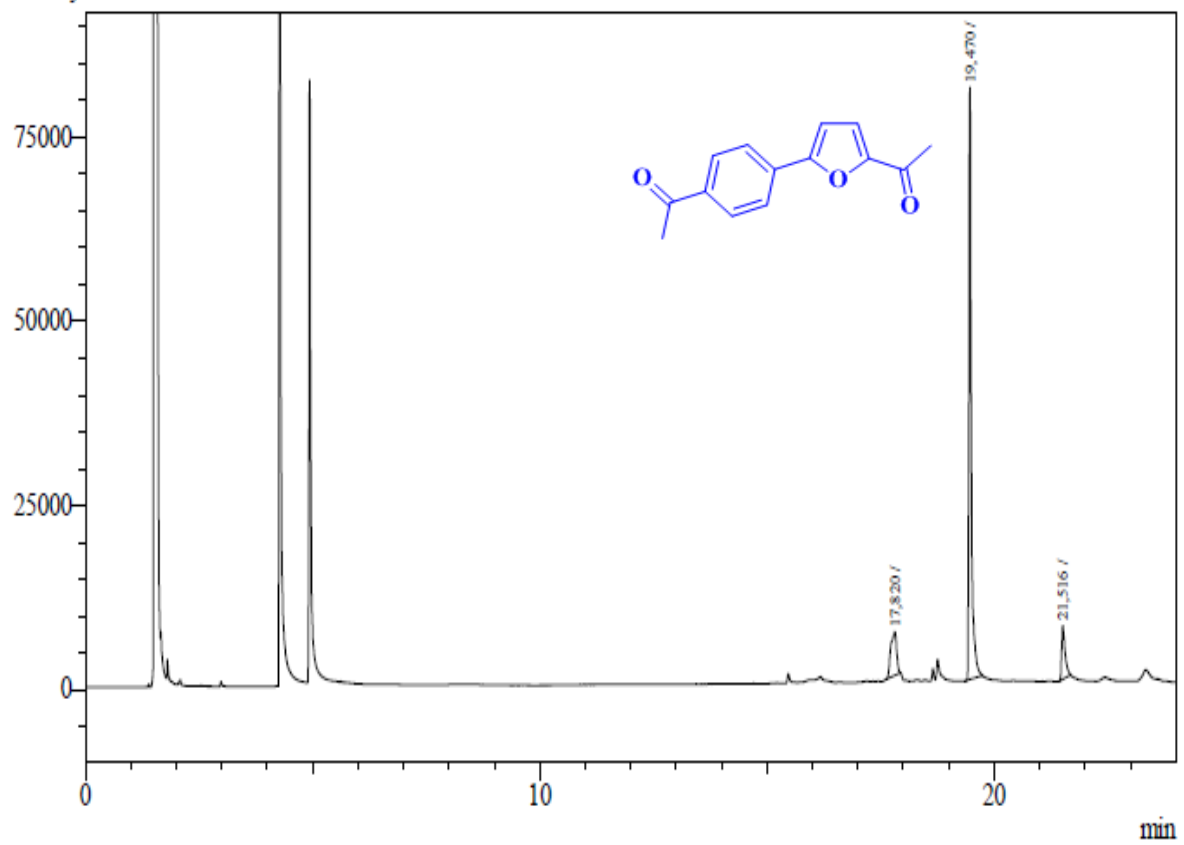

3b

Intensity

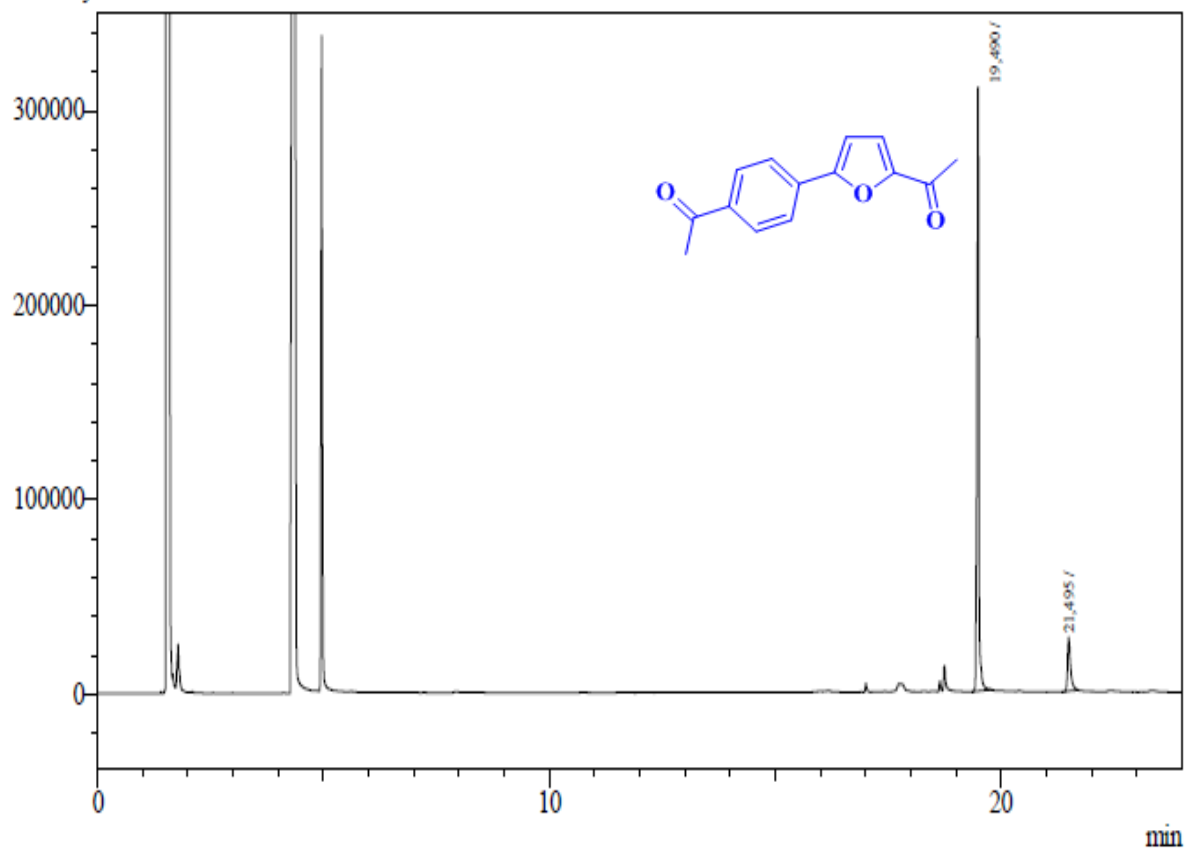

3c

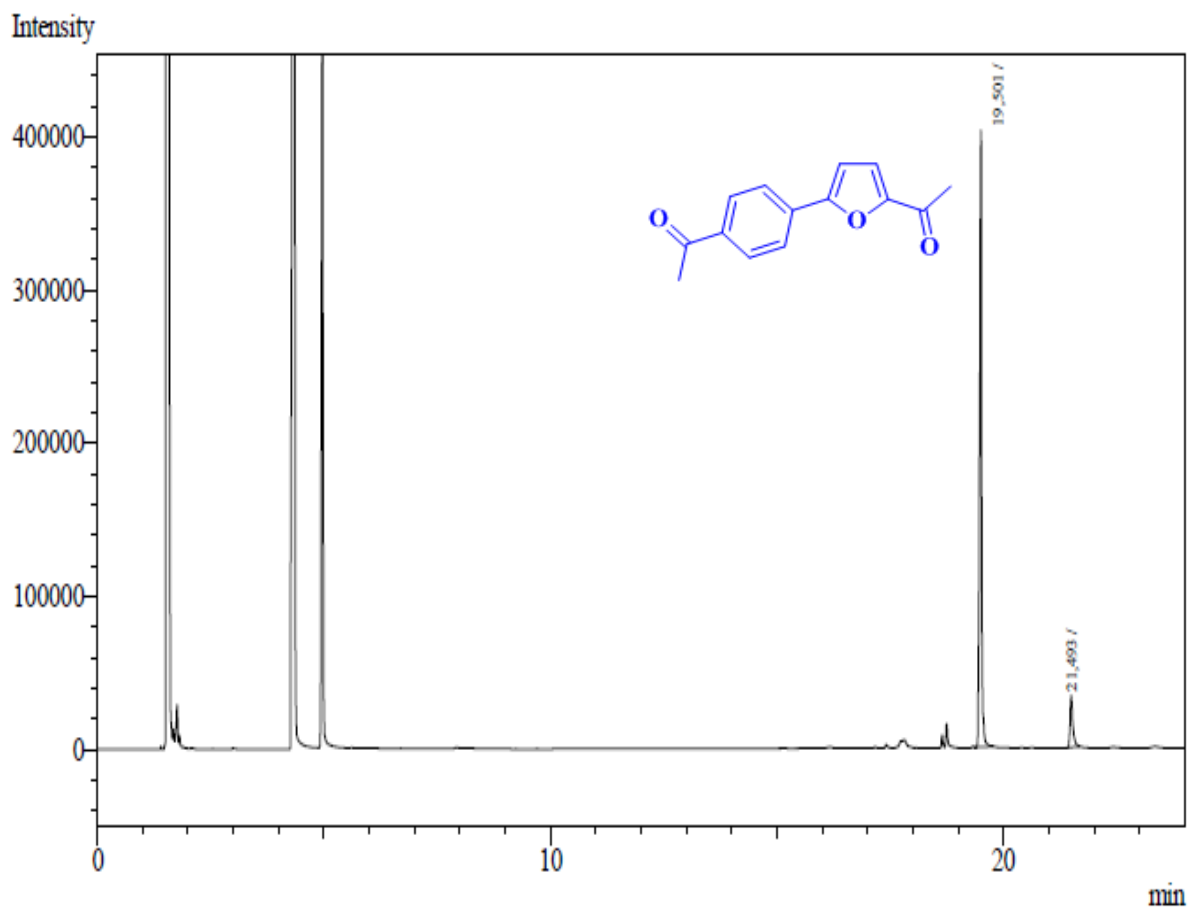

3d

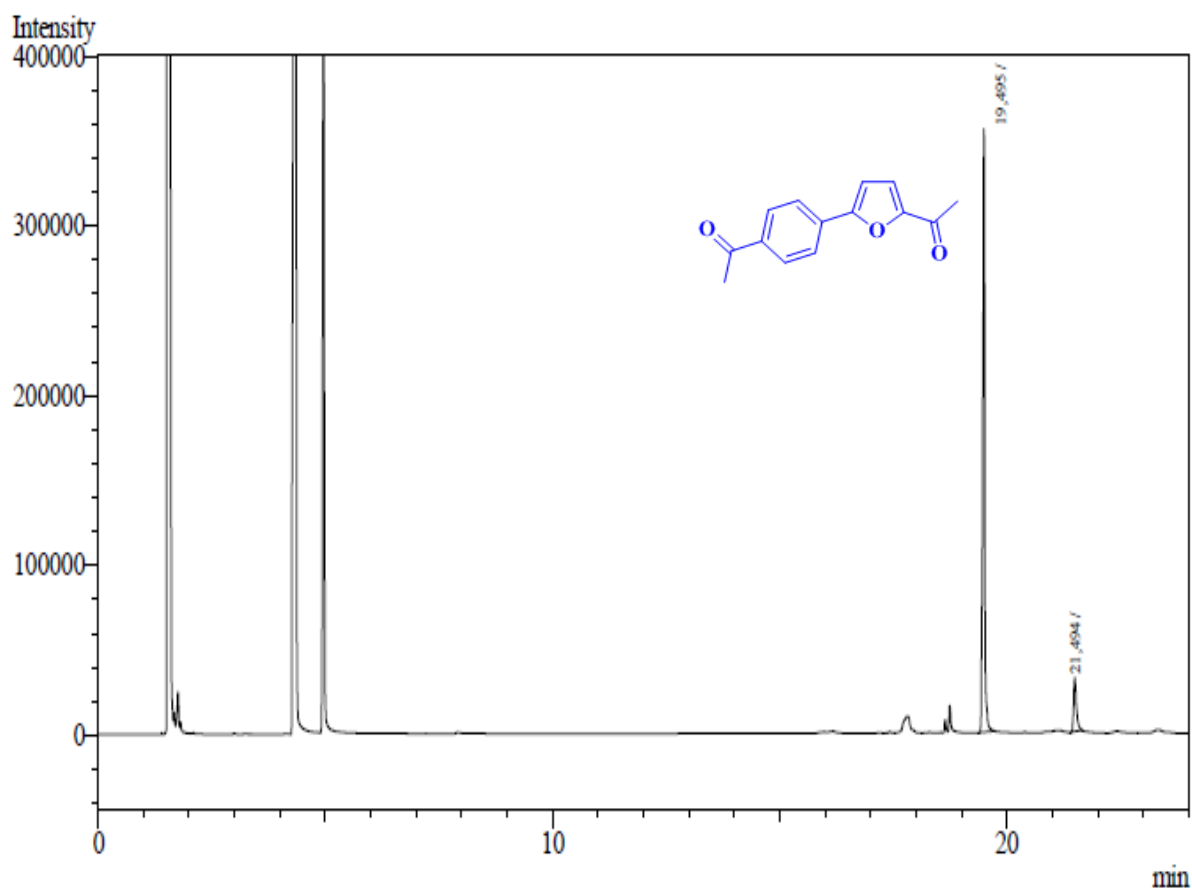

3e

Intensity

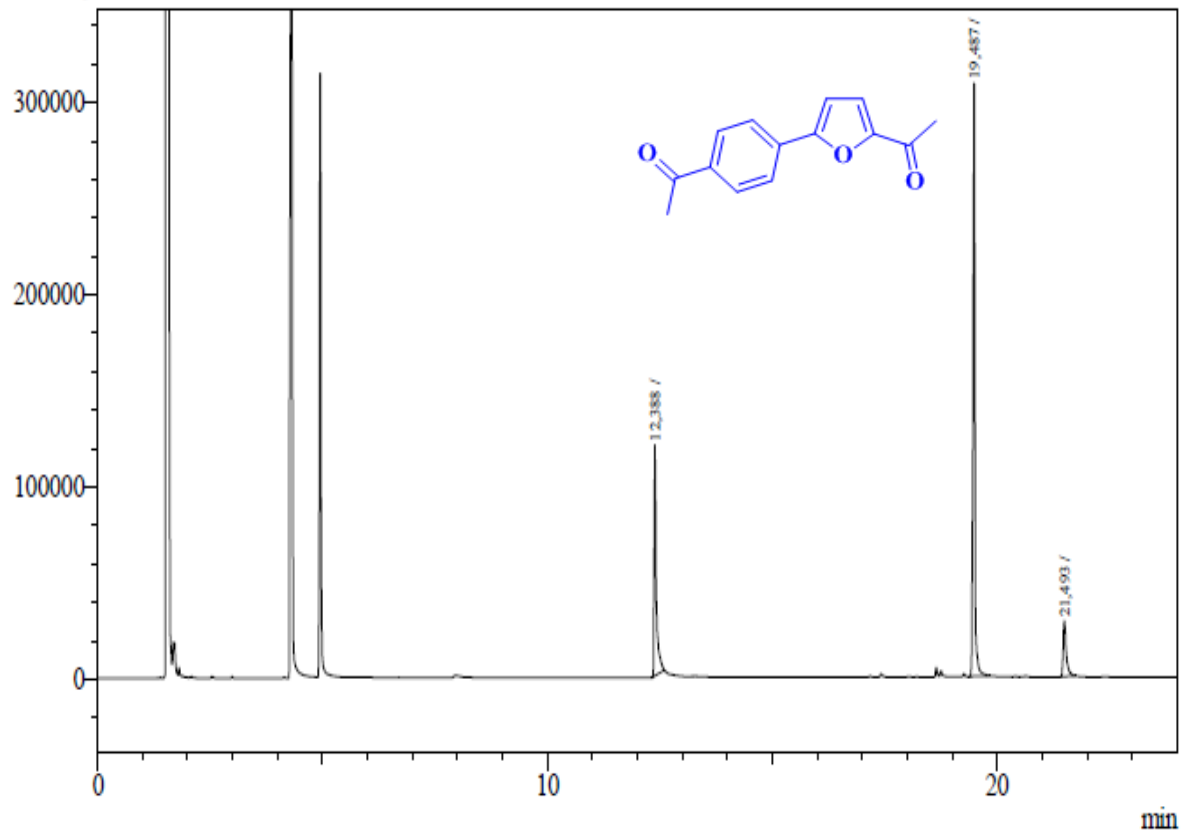

3f

Intensity

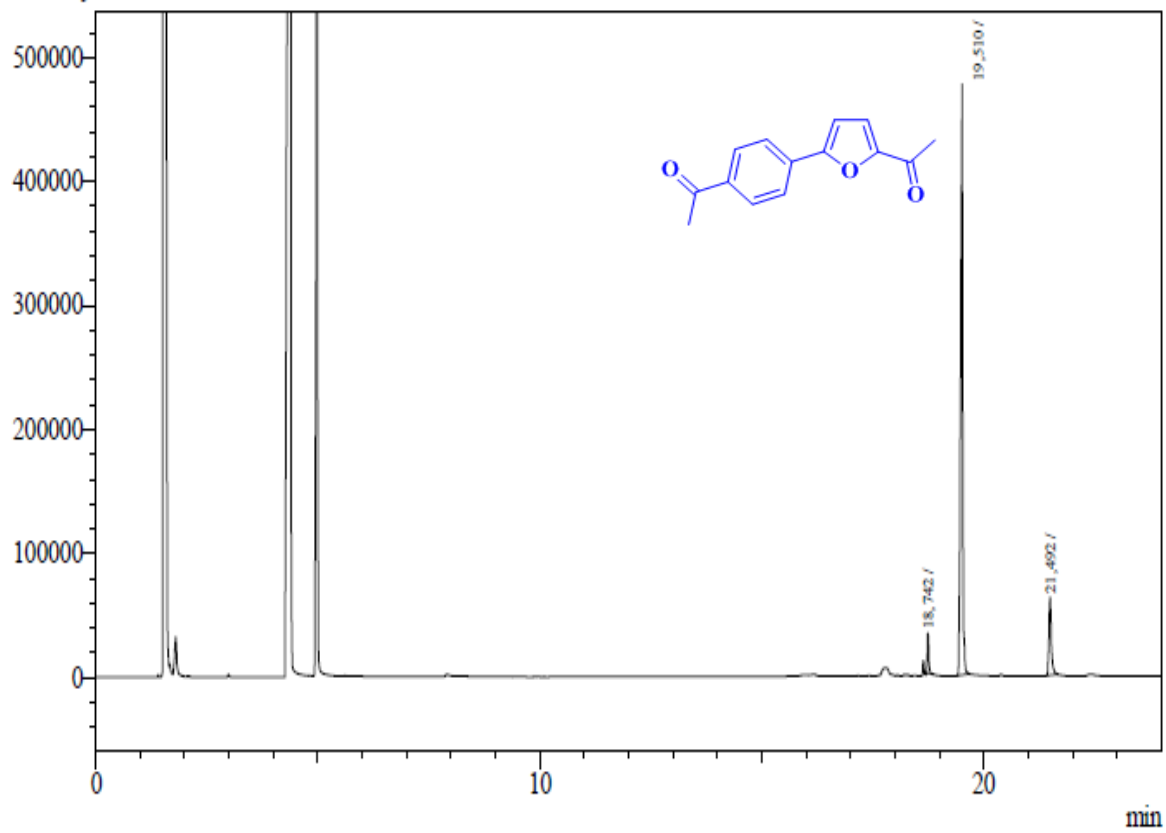

3g

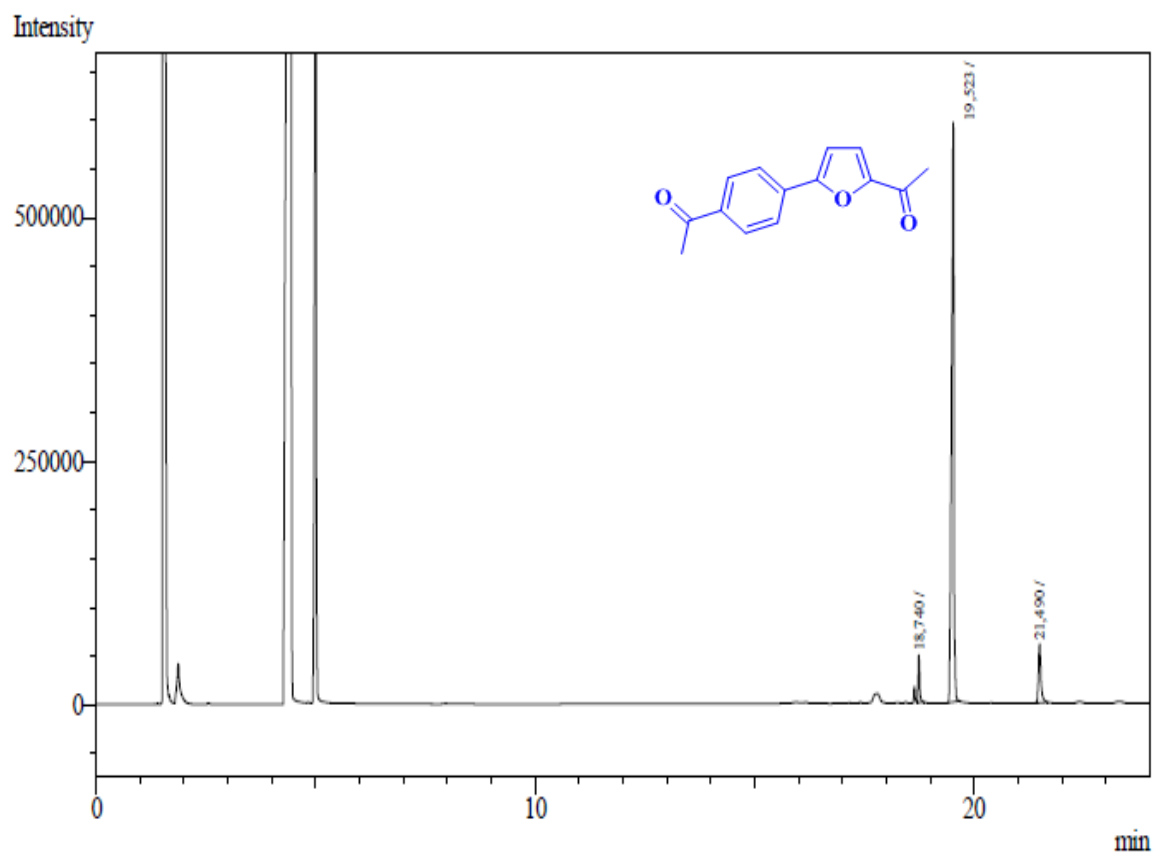

3h

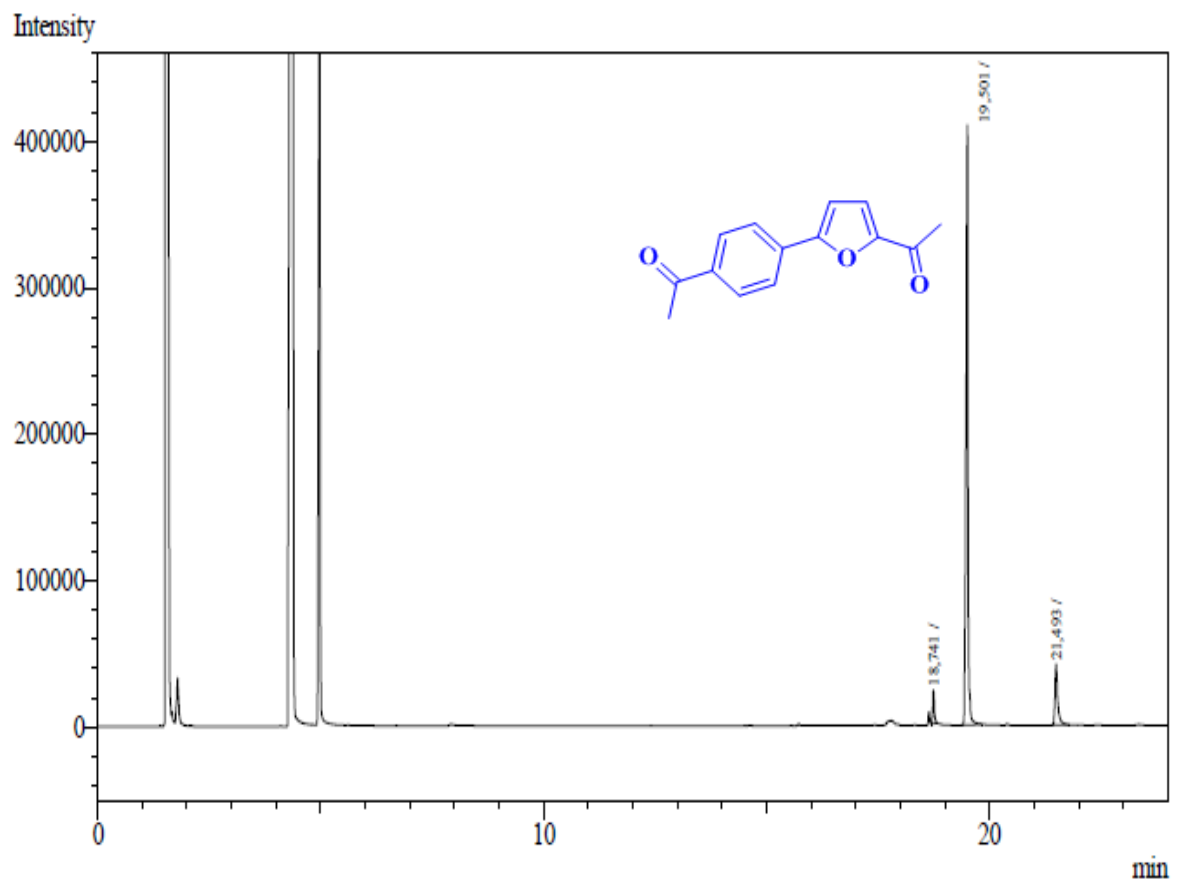

3i

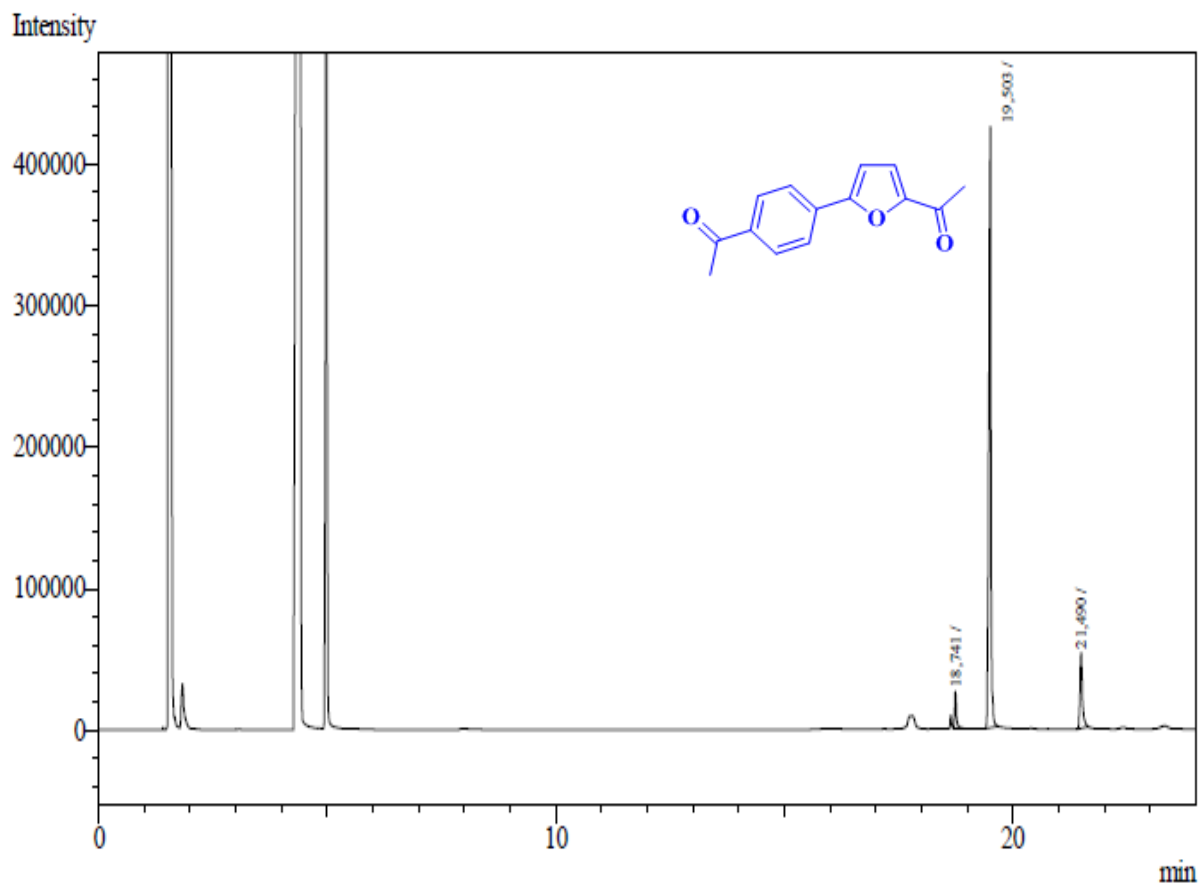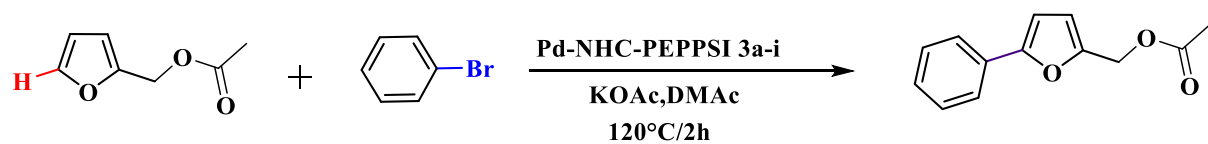

3a

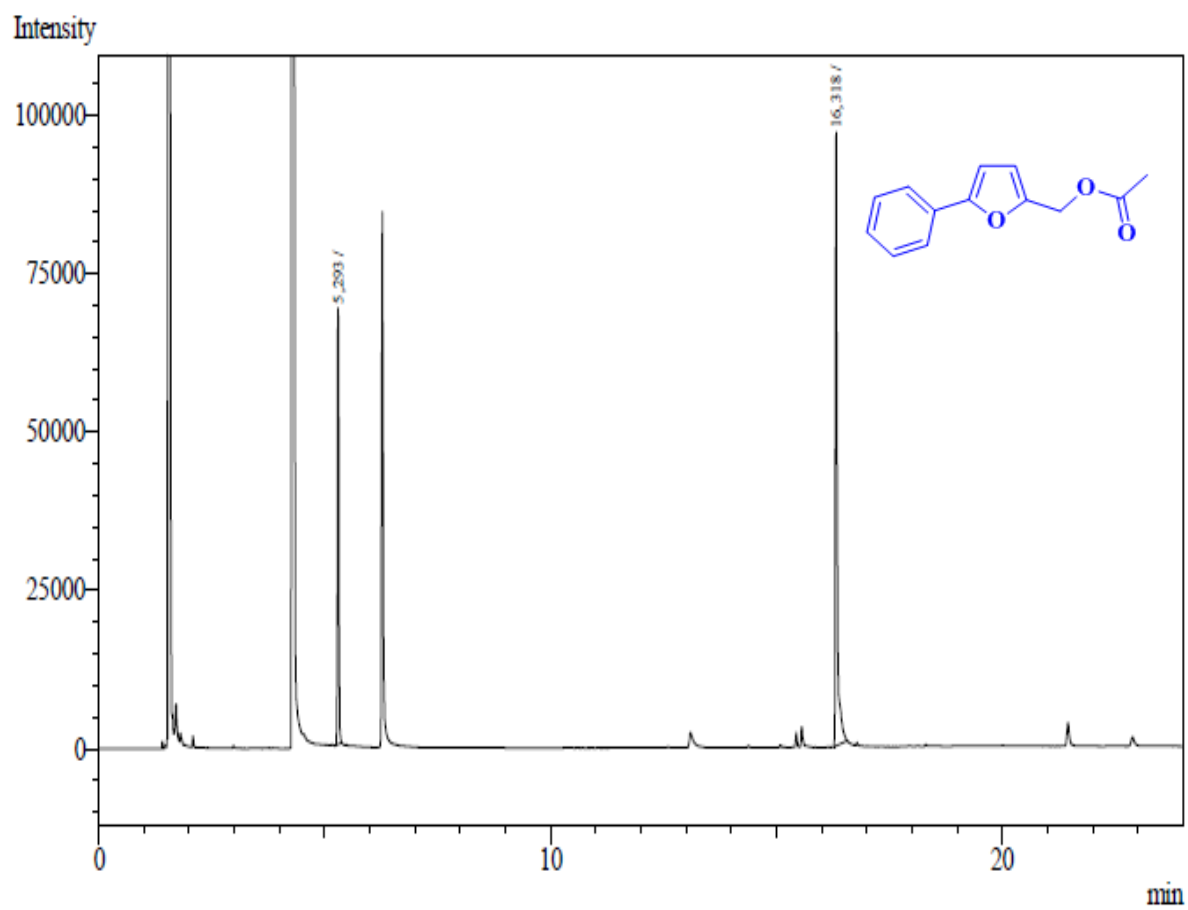

3b



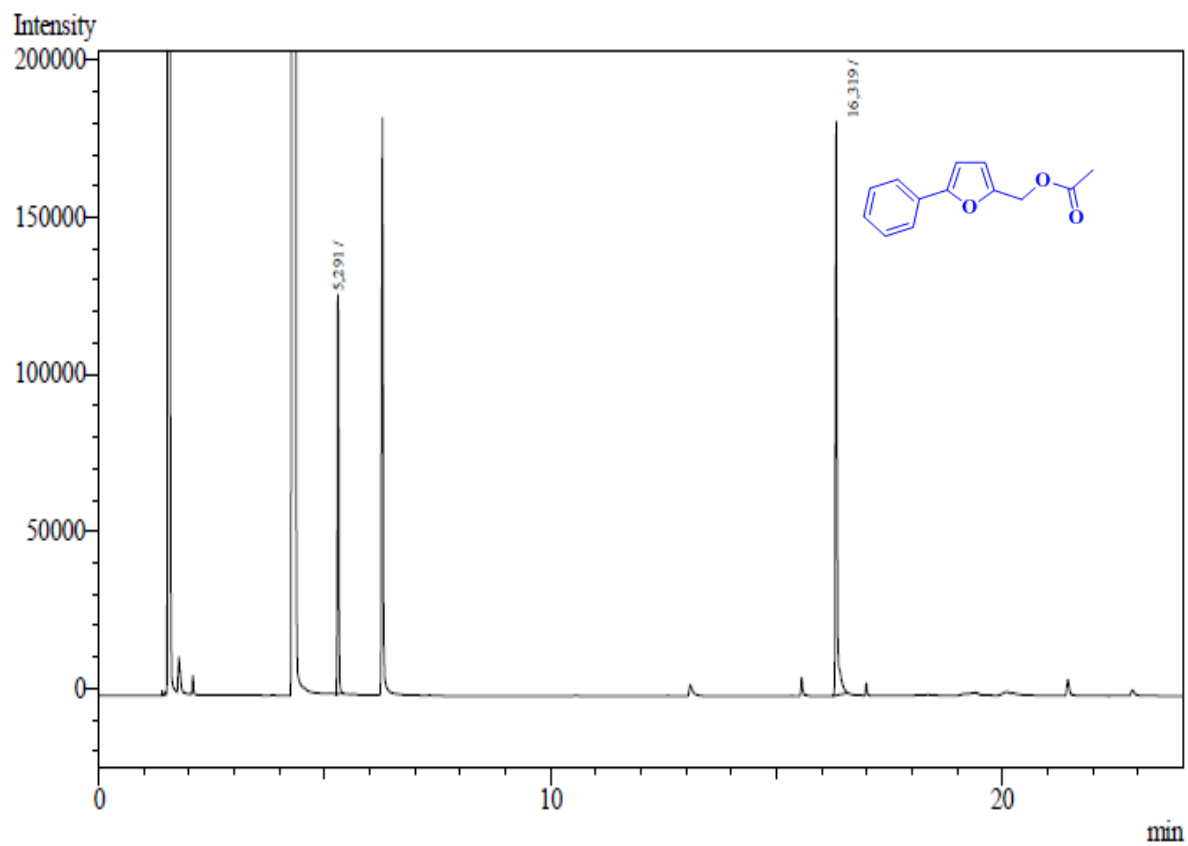

3c

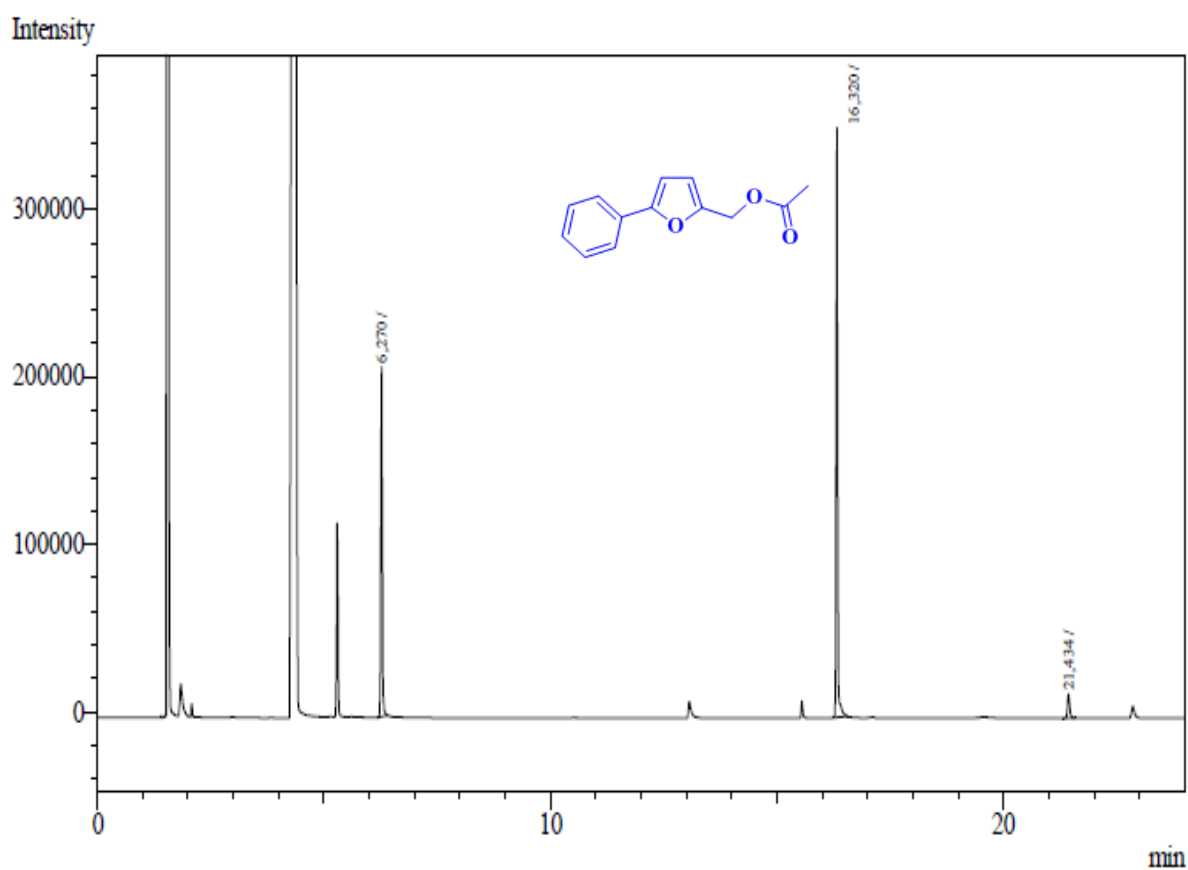

3d

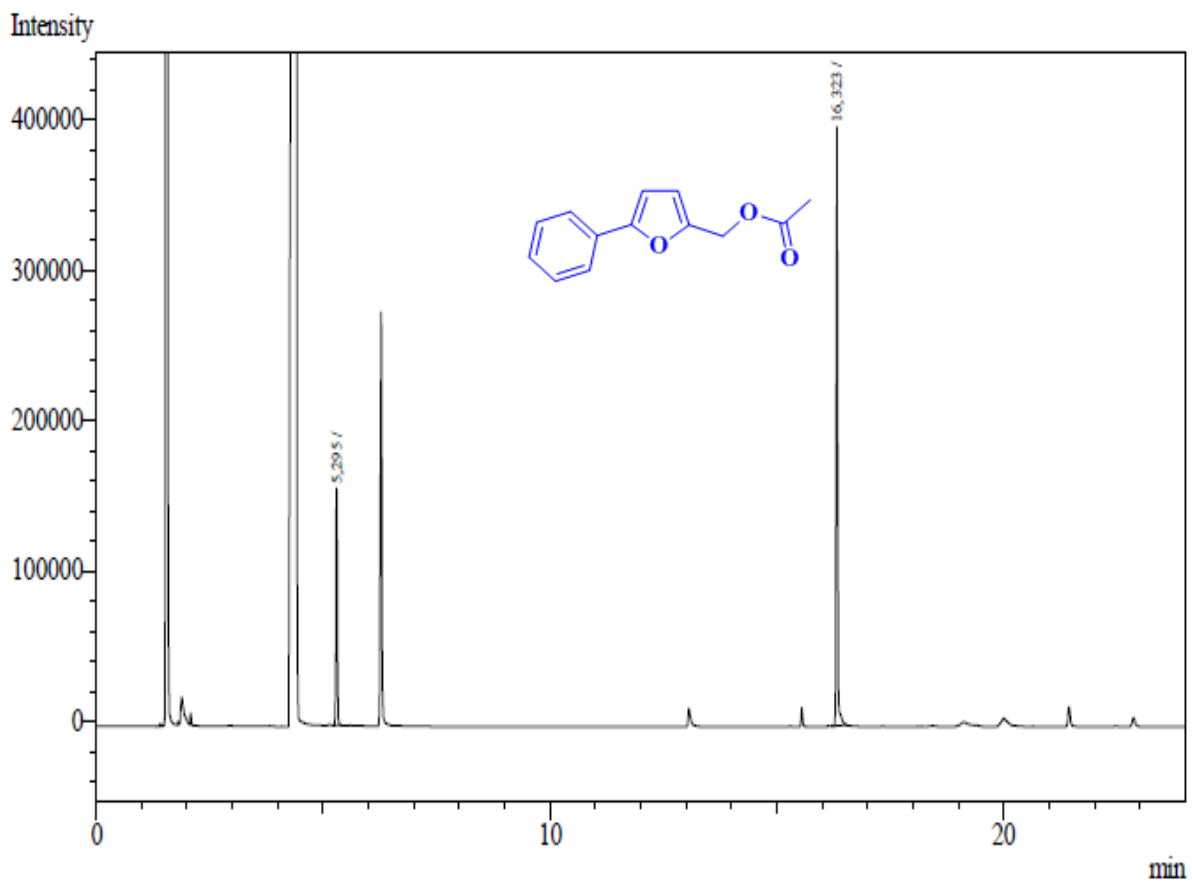

3e

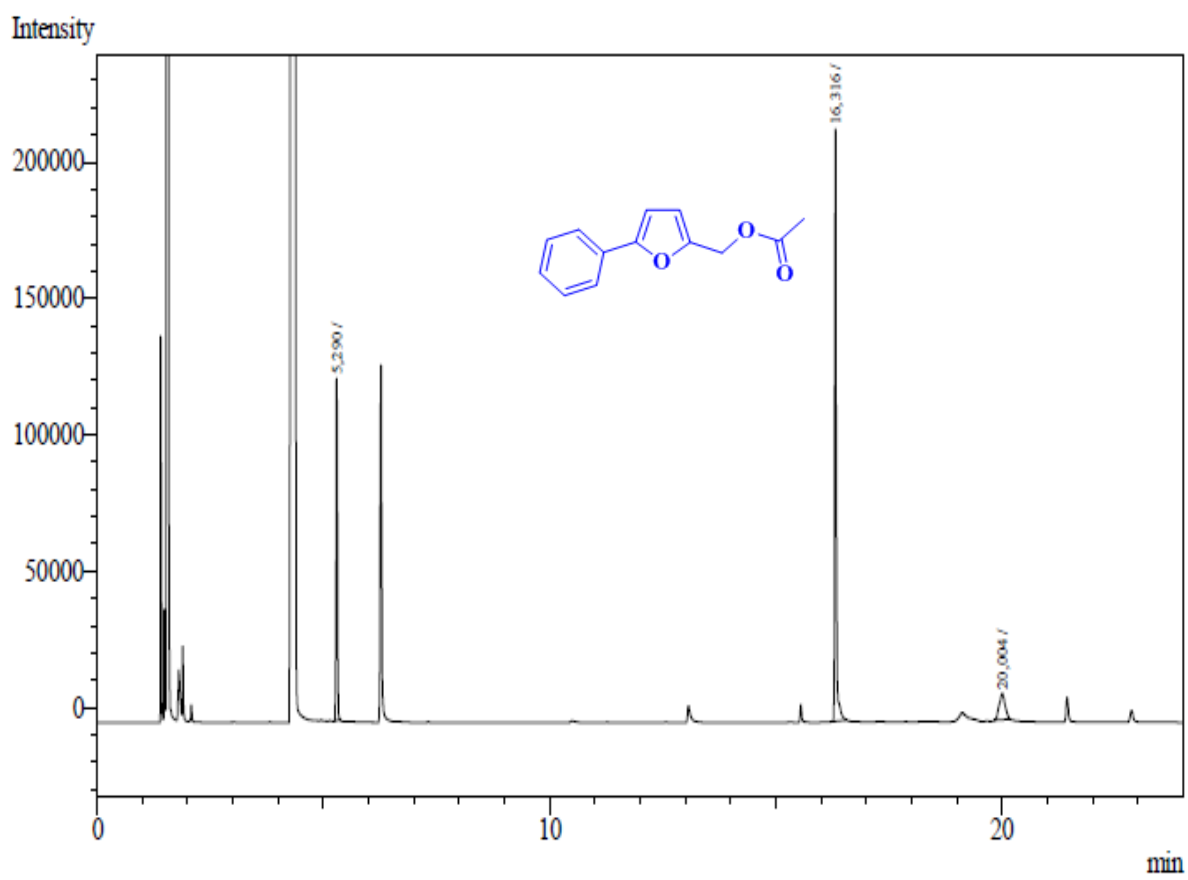

3f

Intensity

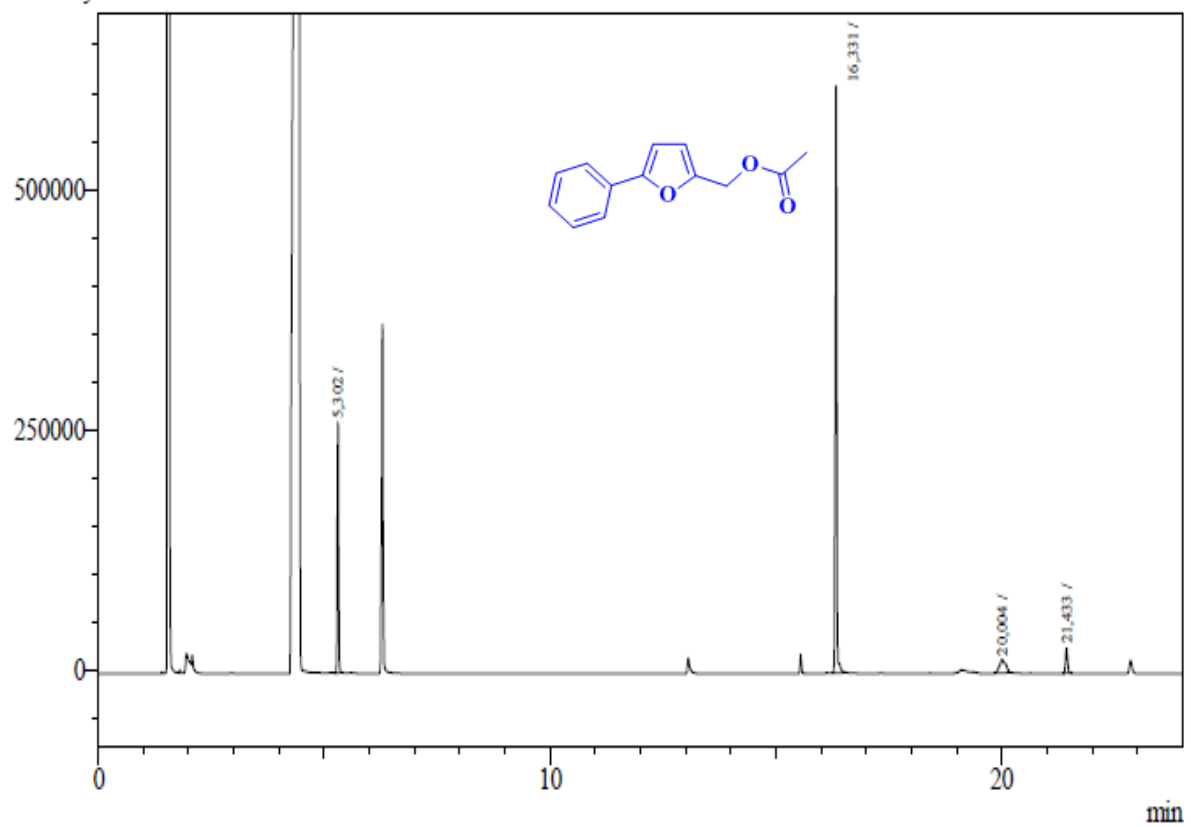

3g

Intensity

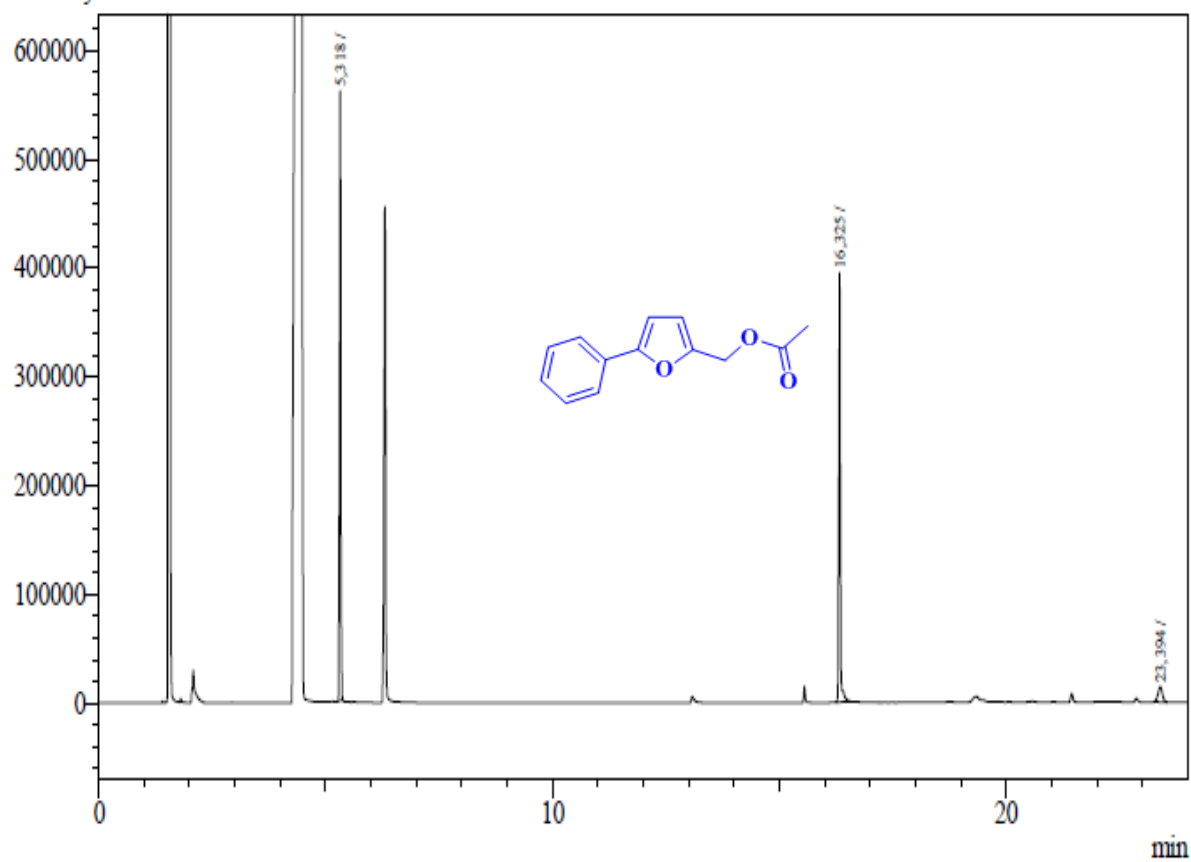

3h

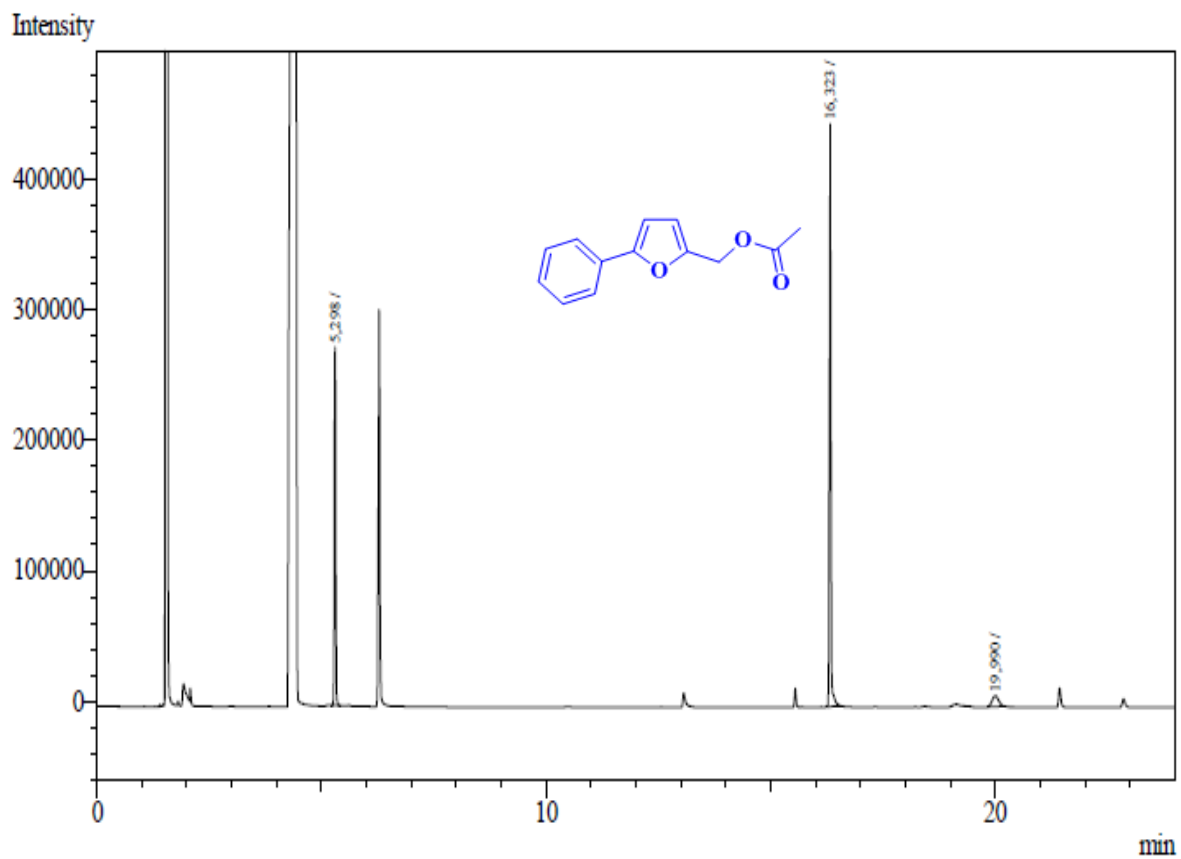

3i

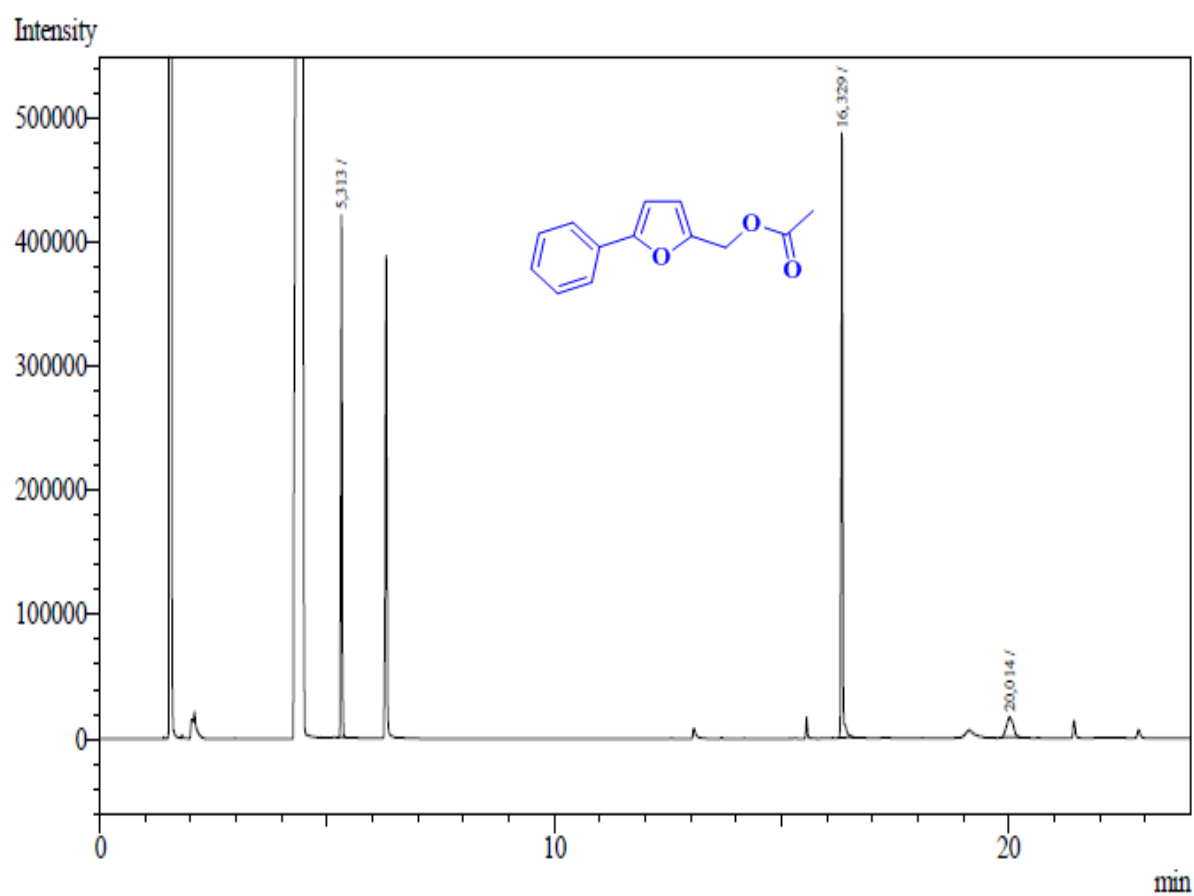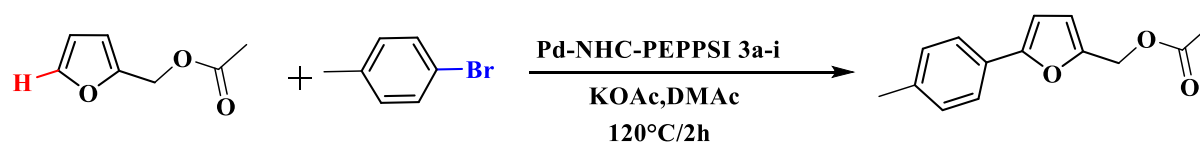

3a

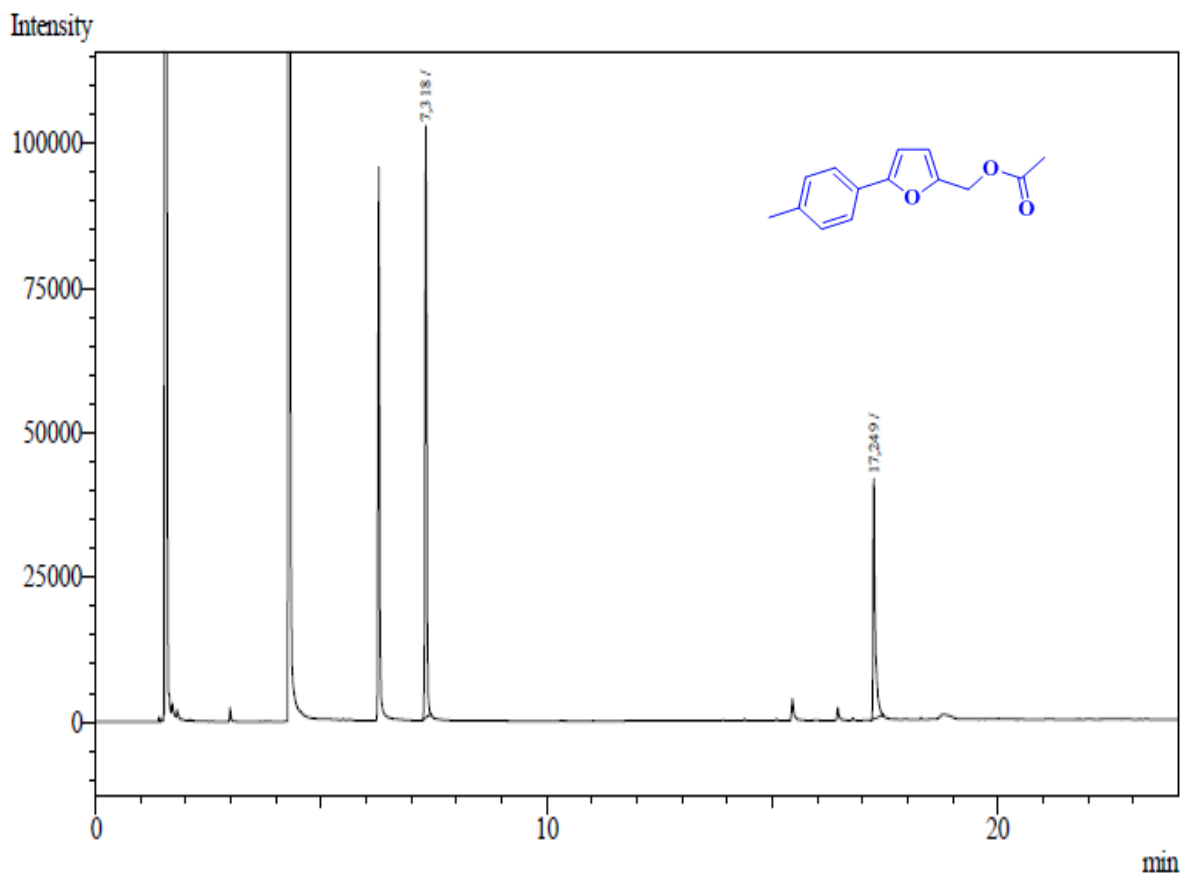

3b

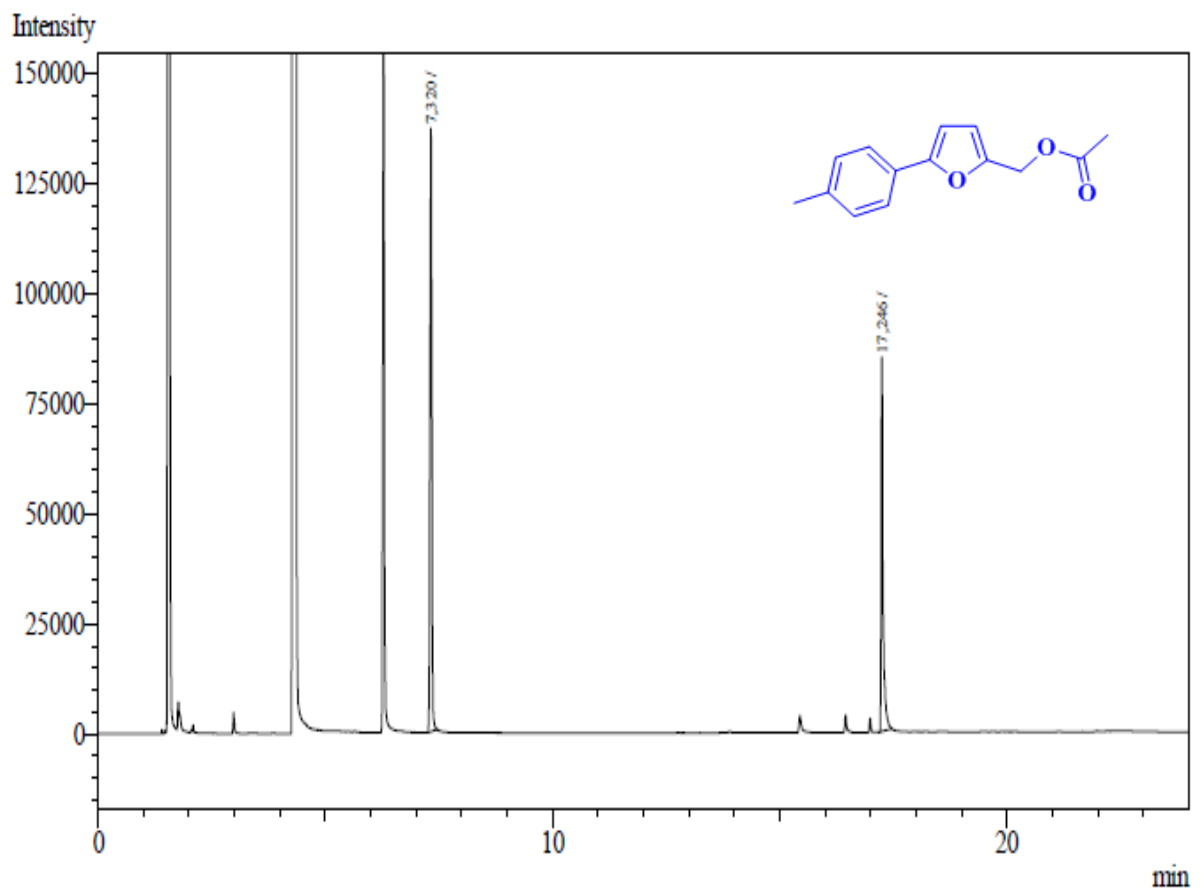

3c

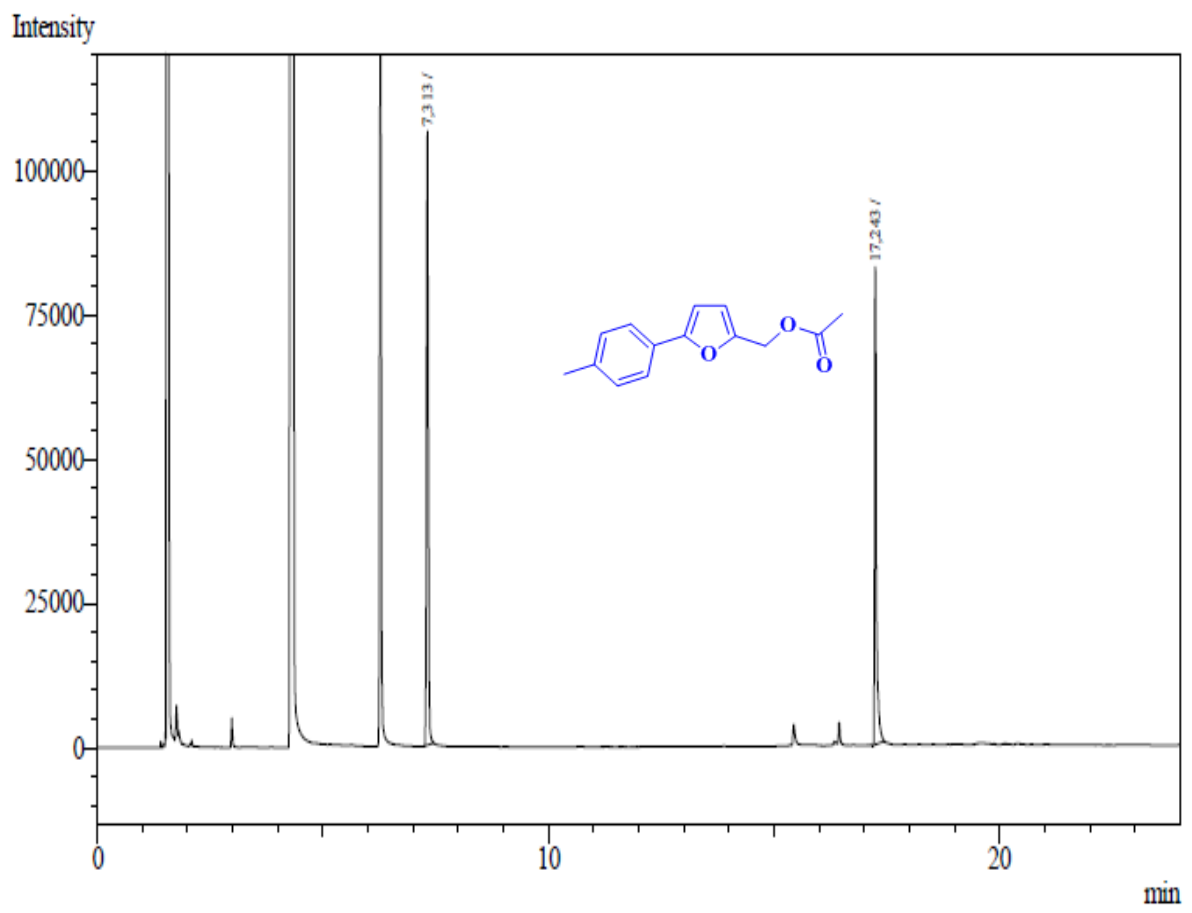

3d

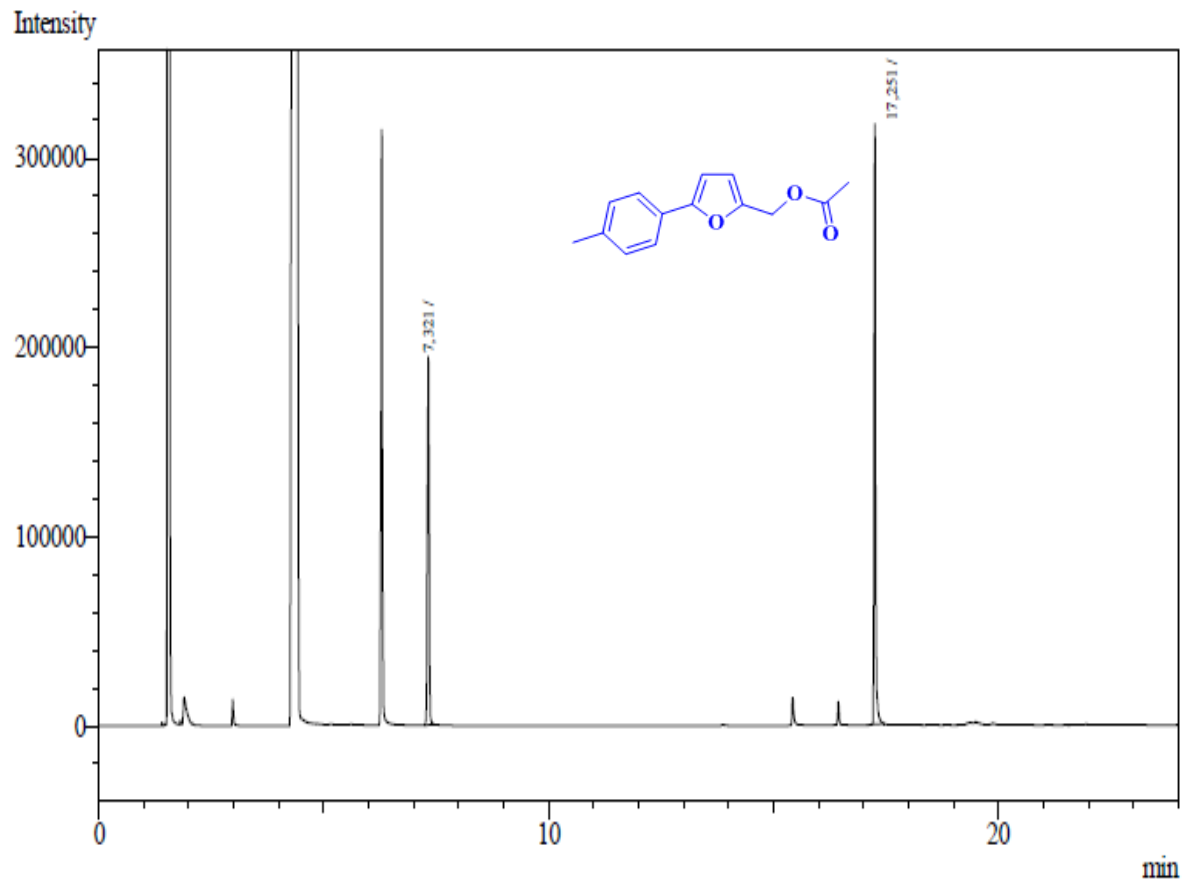

3e

Intensity

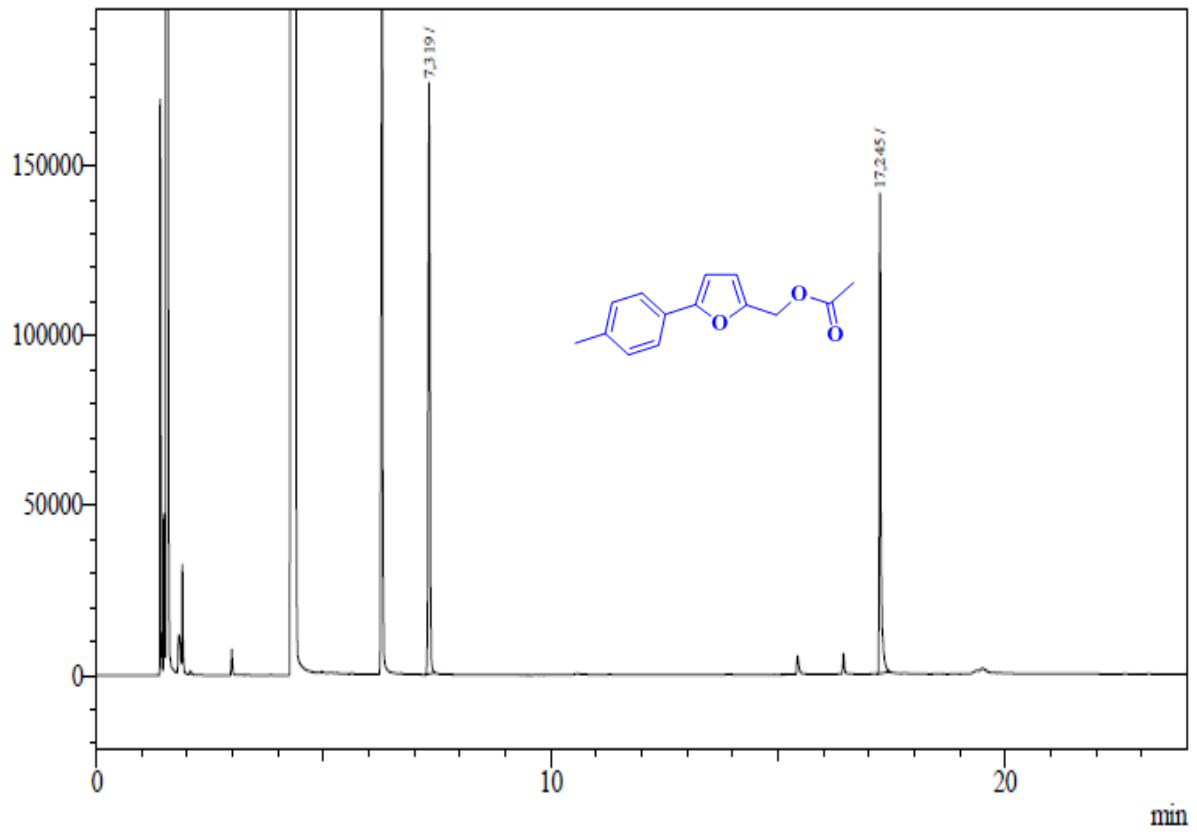

3f

Intensity

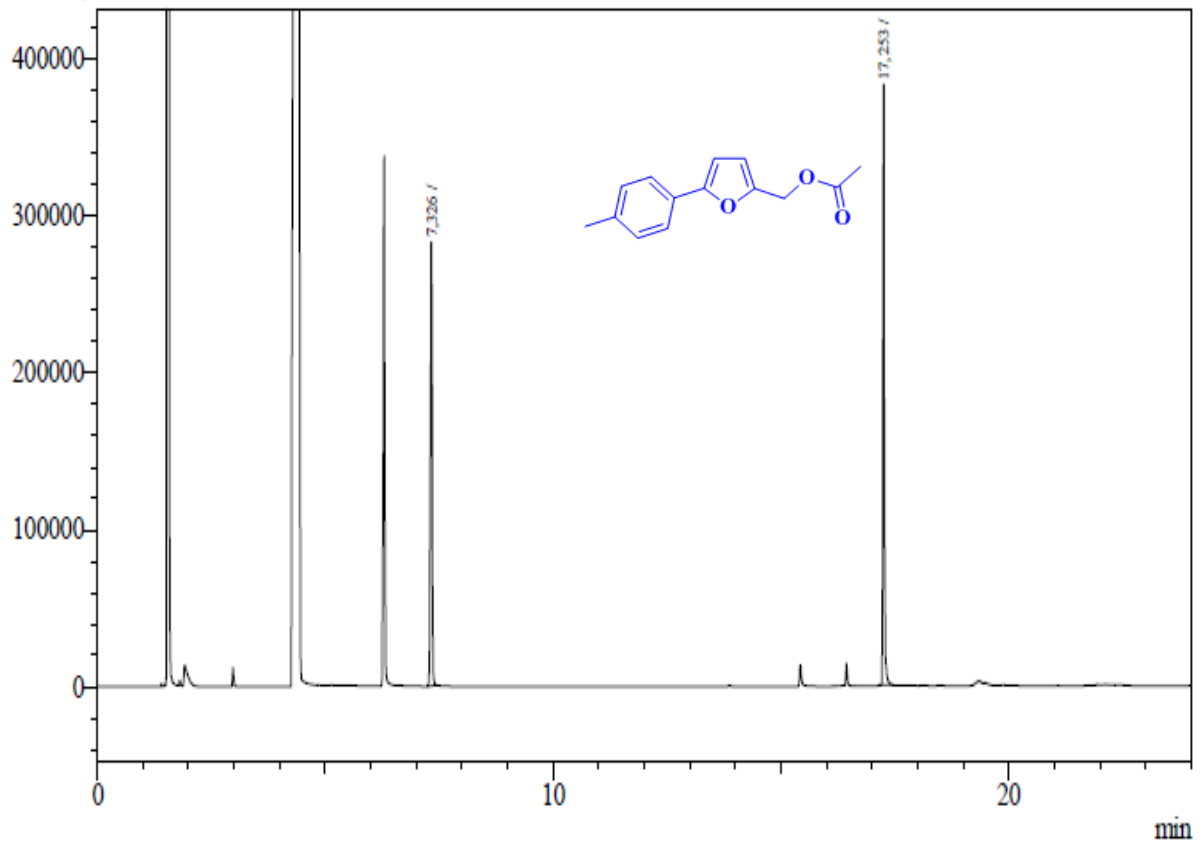

3g

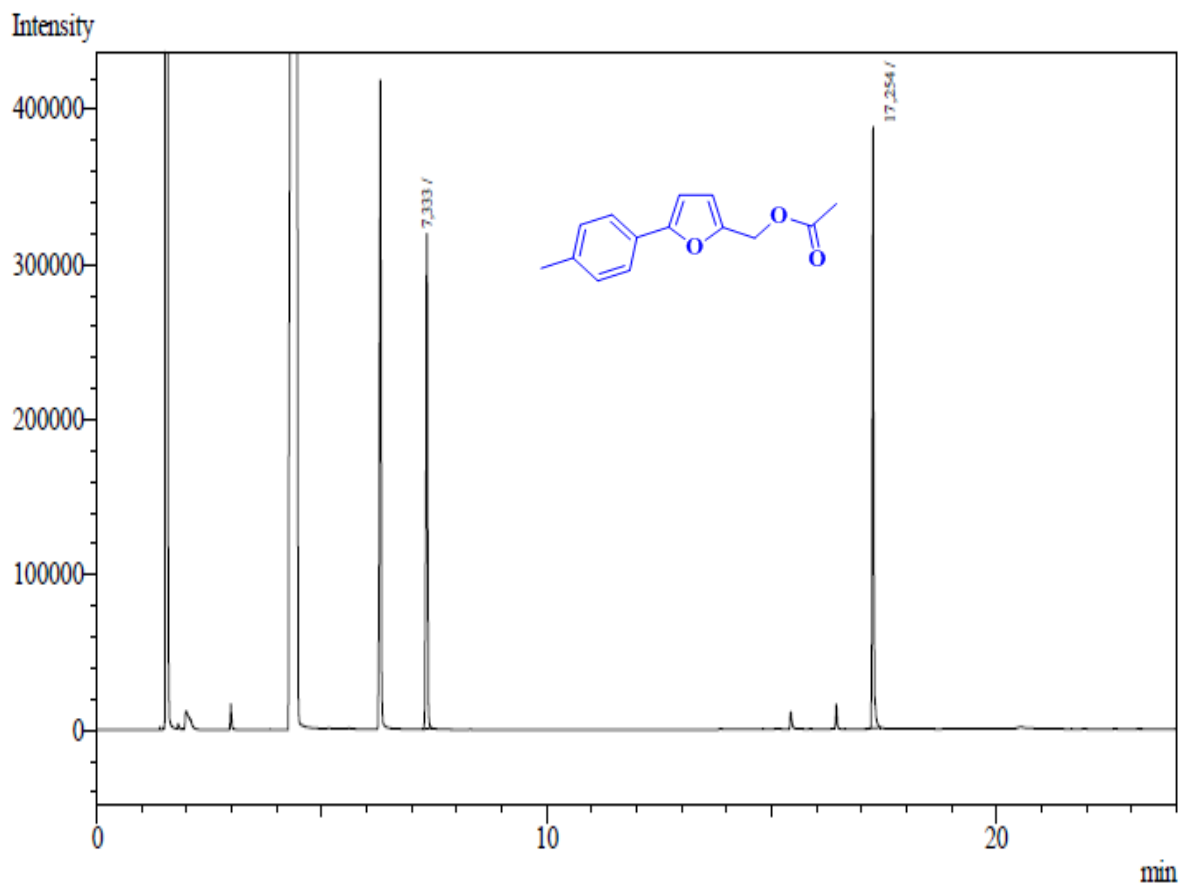

3h

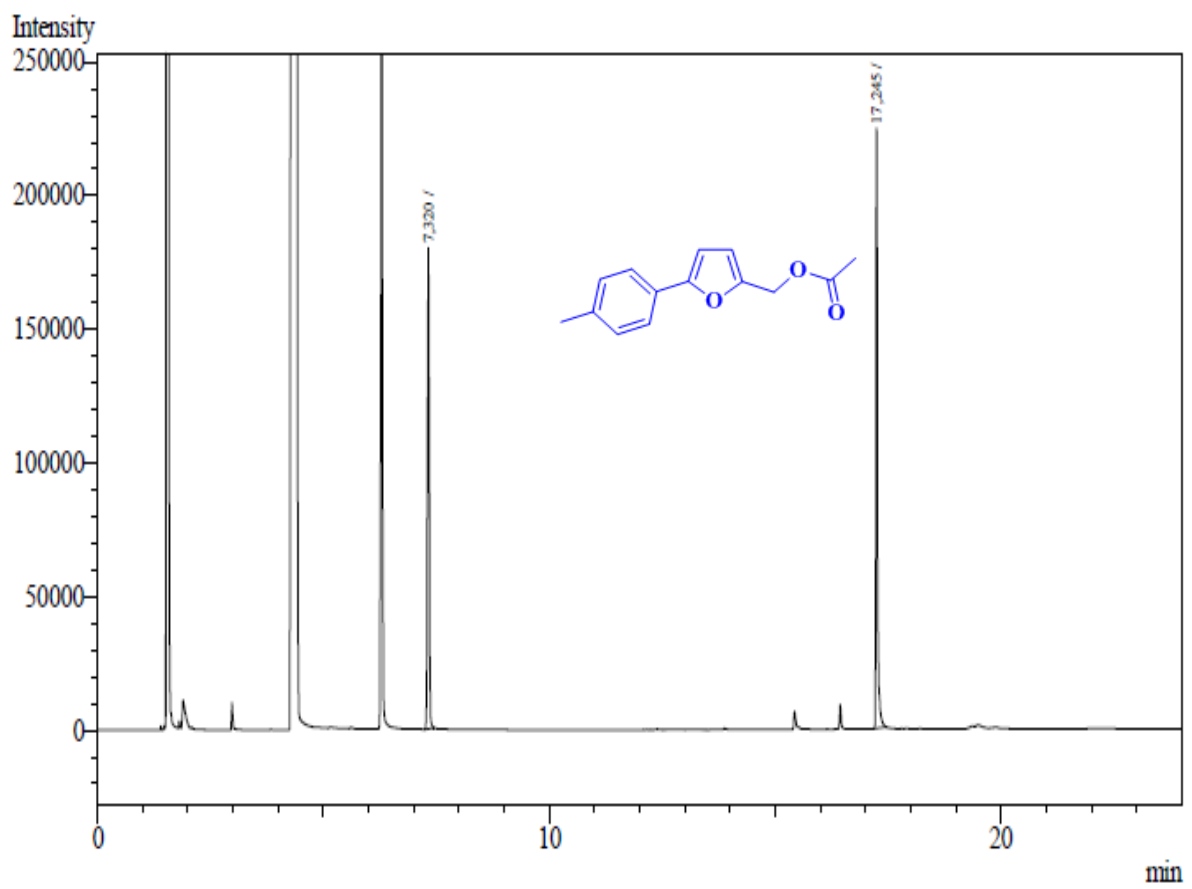

3i



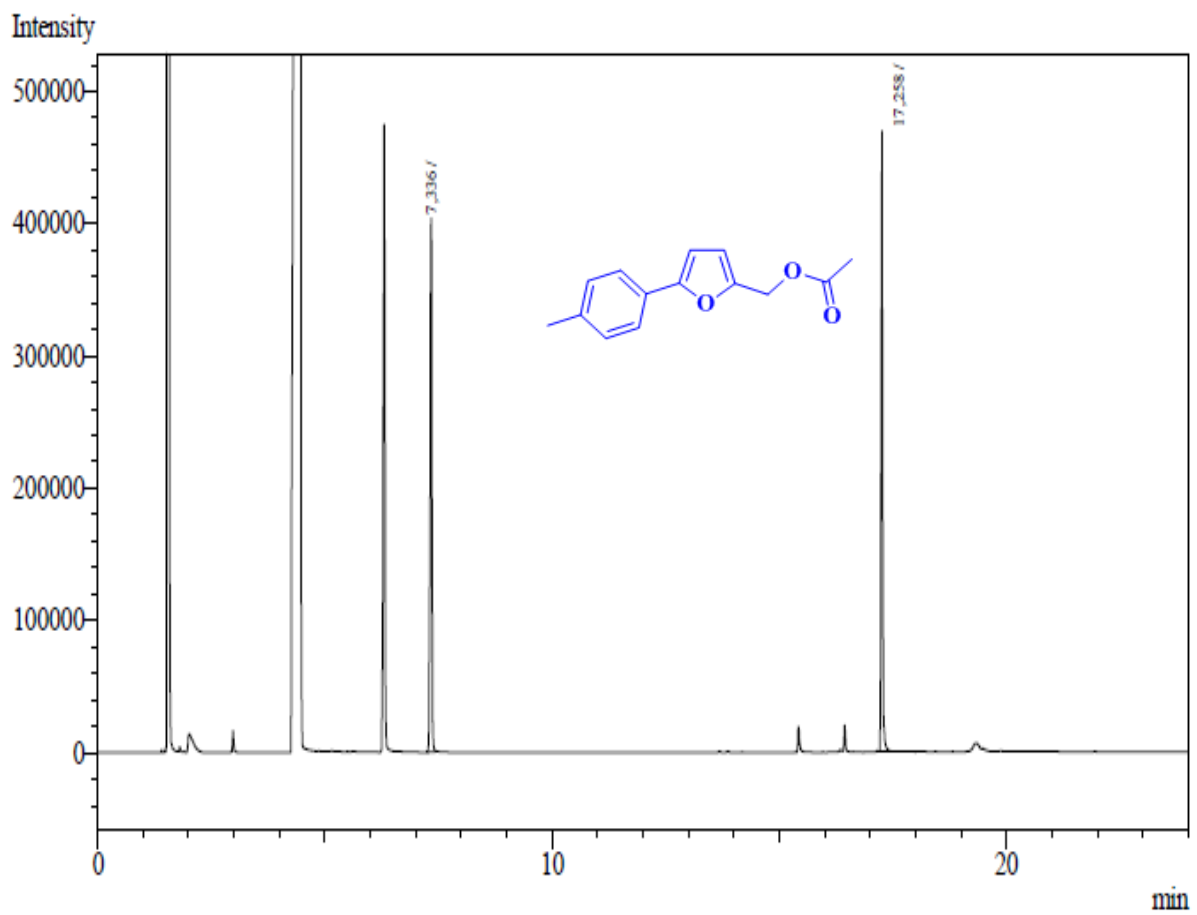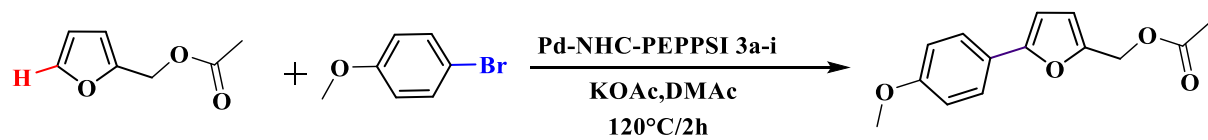

3a

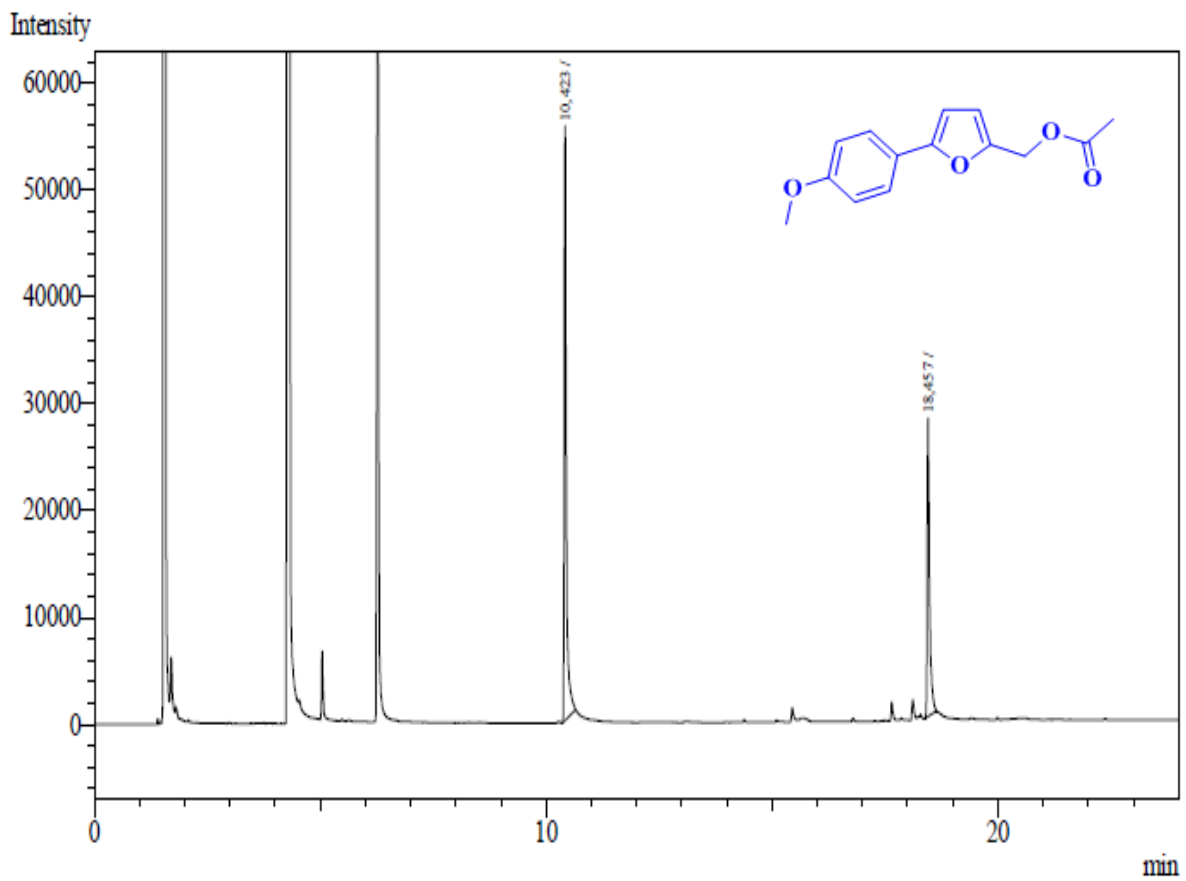

3b

Intensity

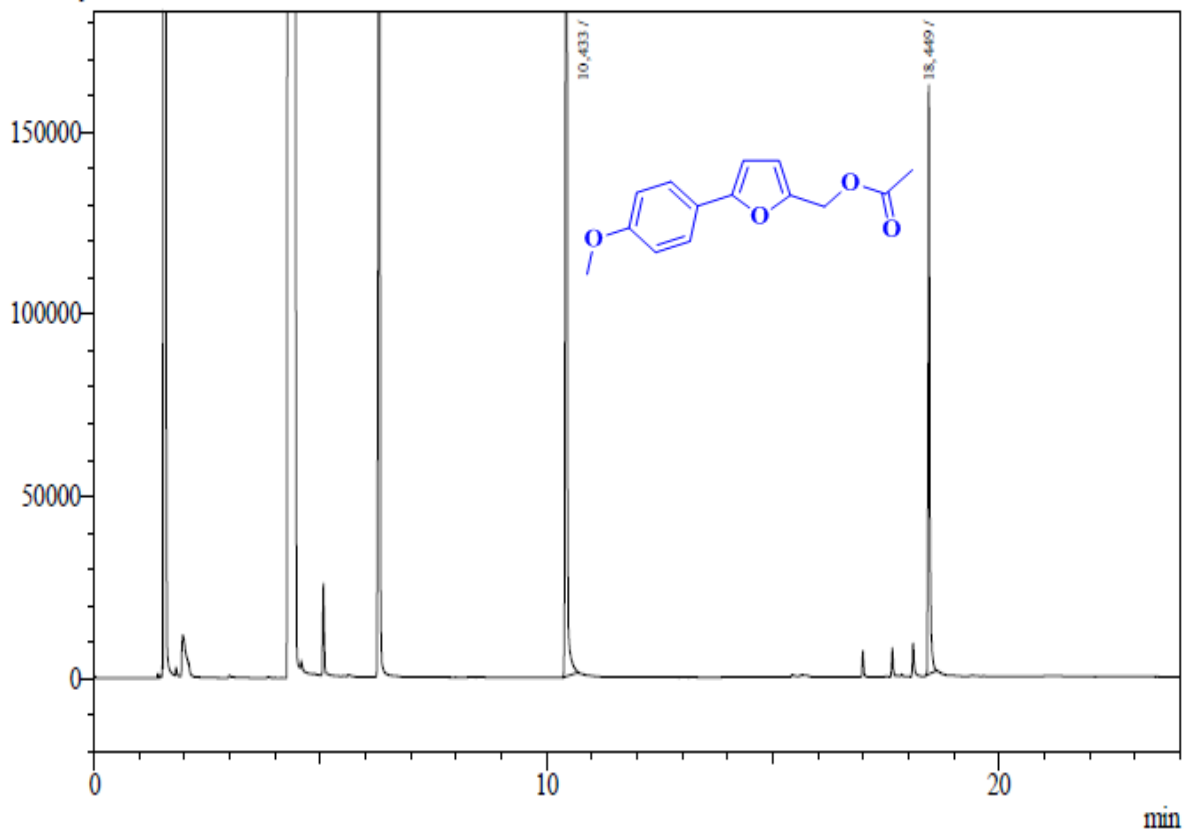

3c

Intensity

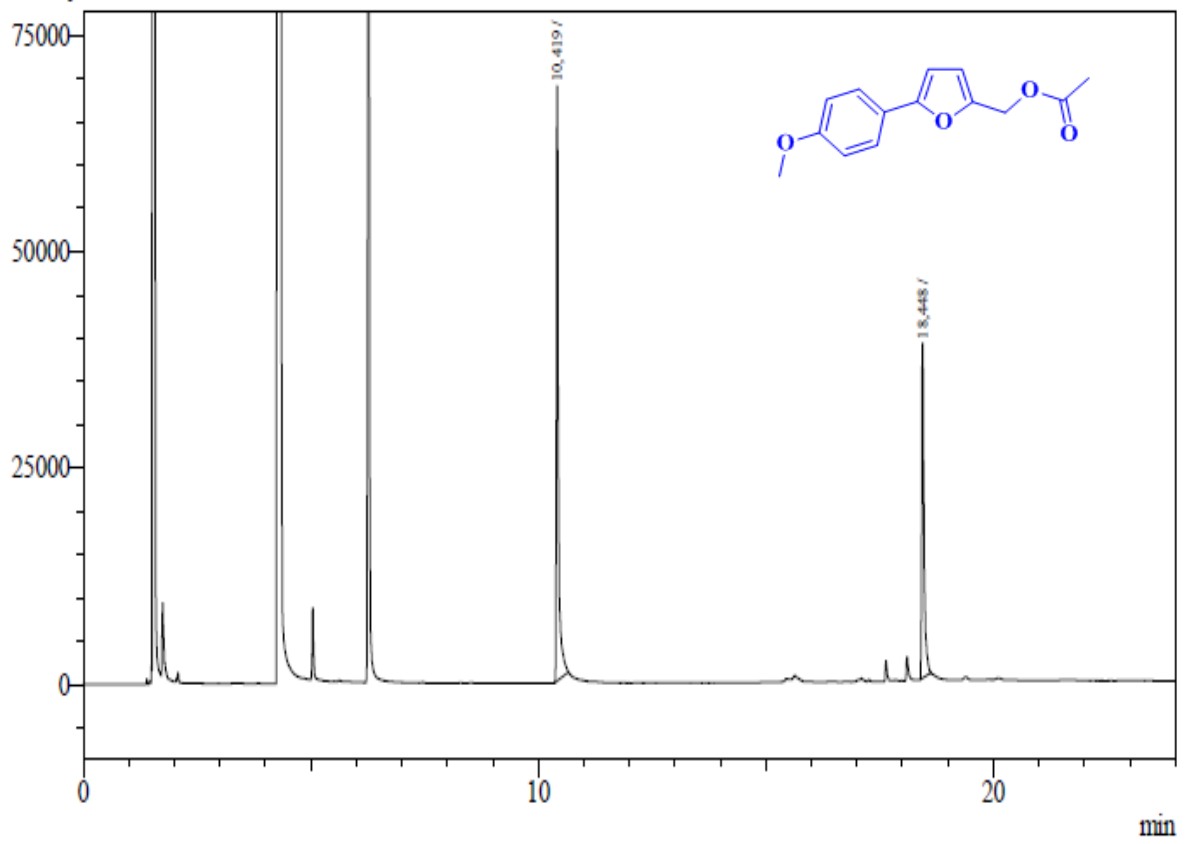

3d

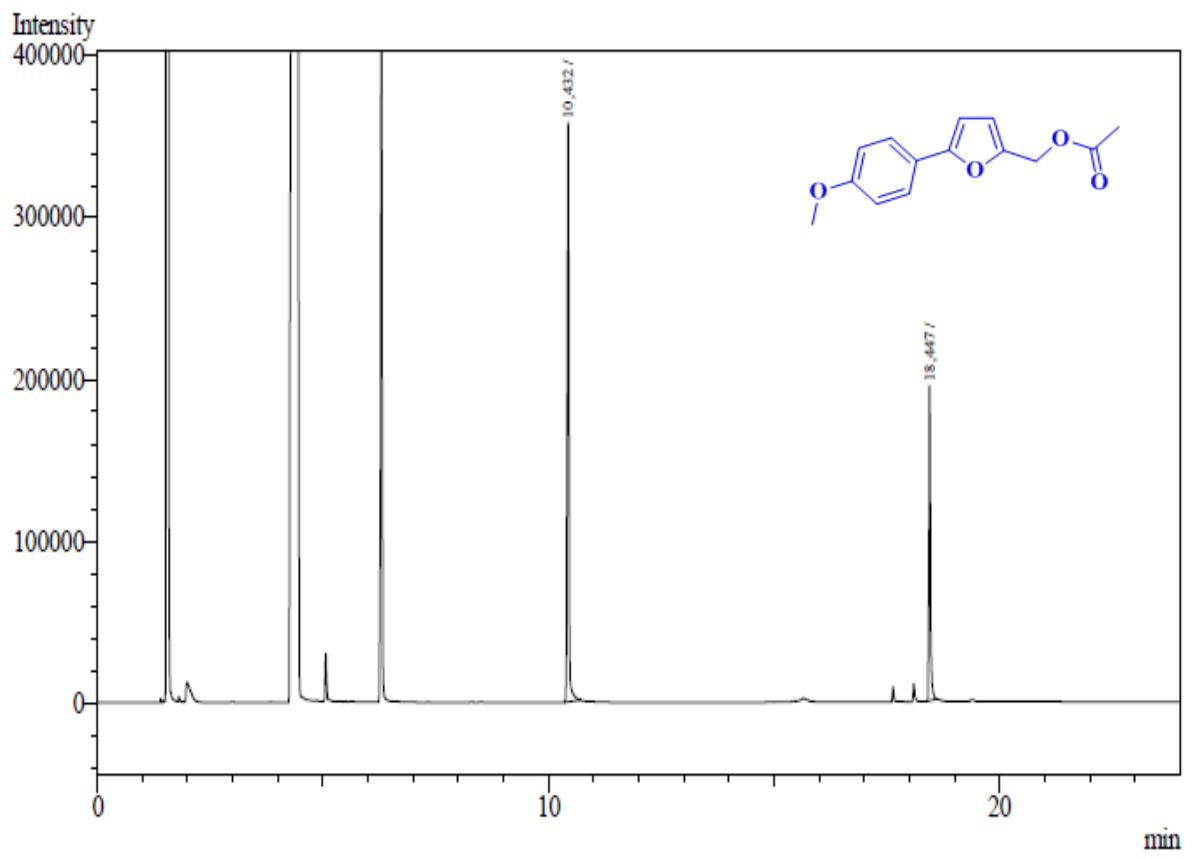

3e

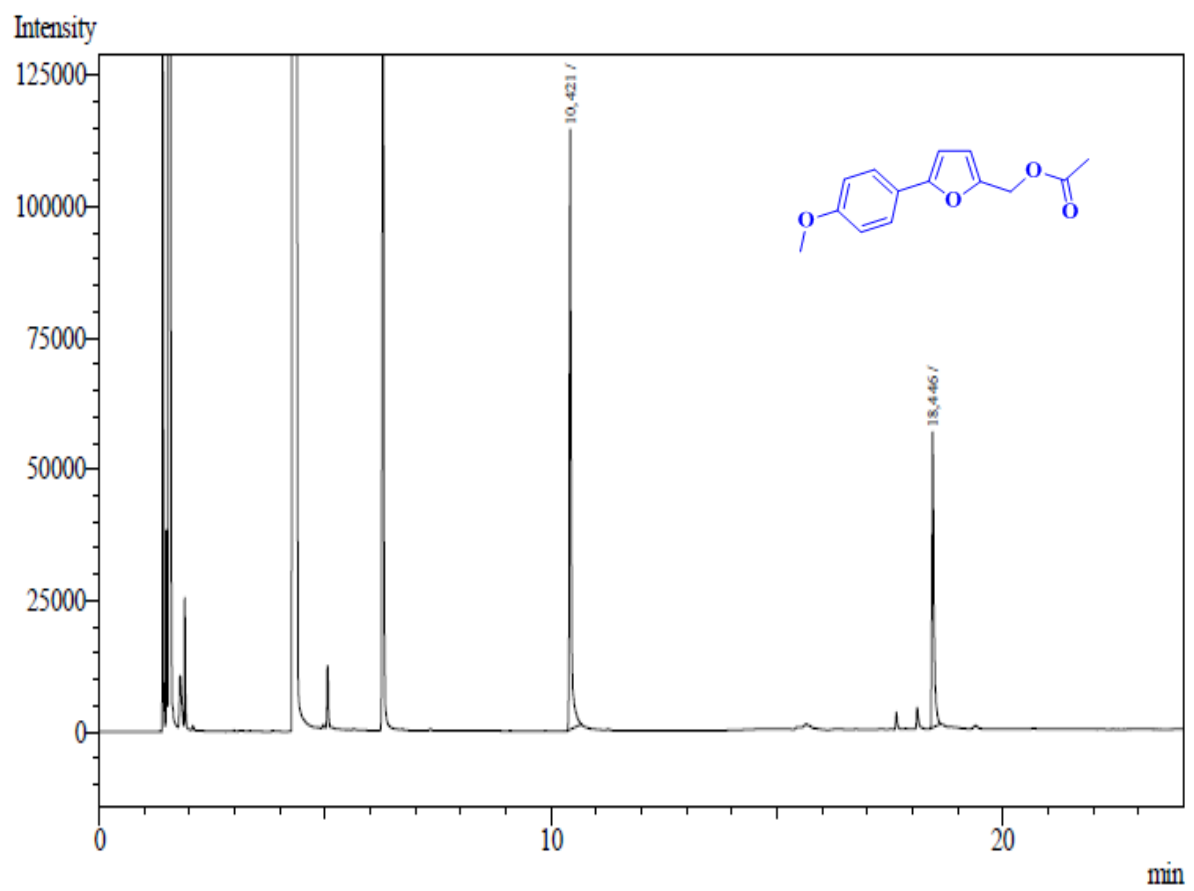

3f

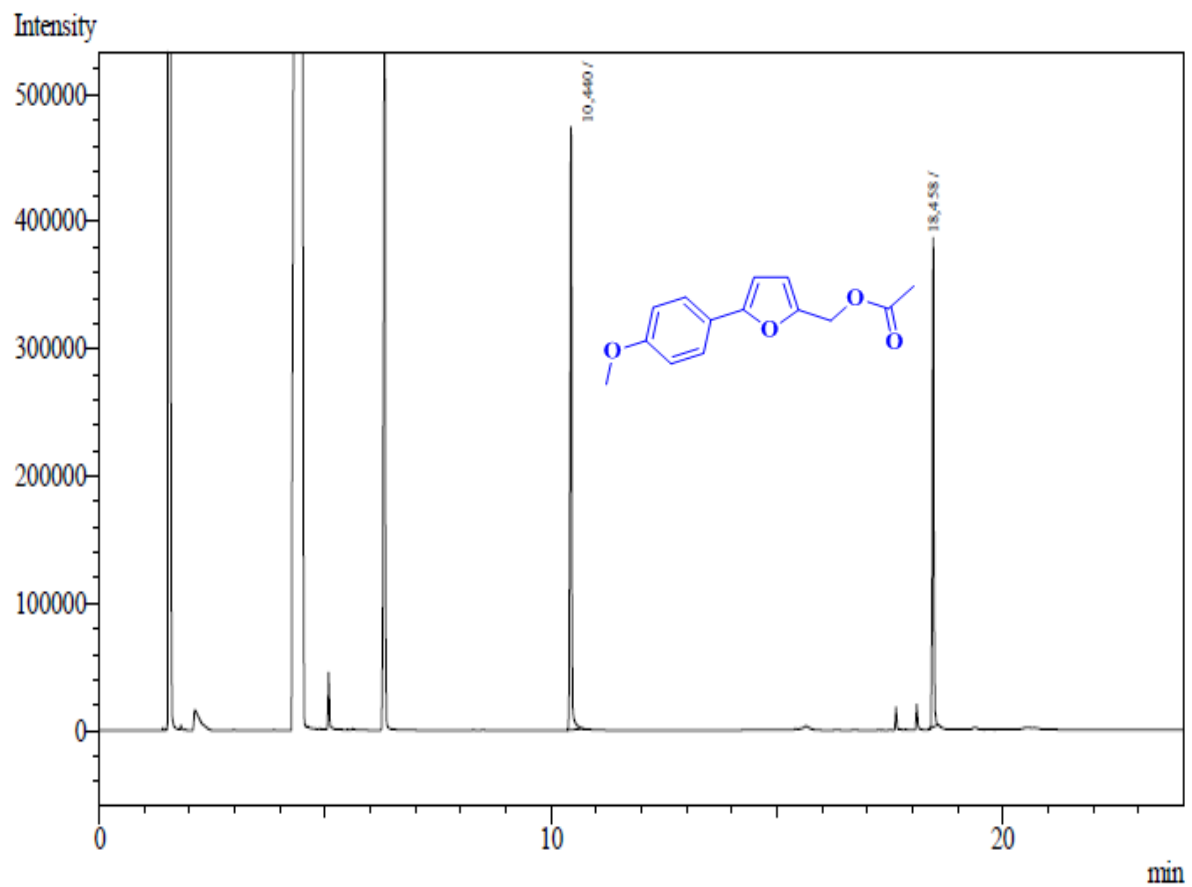

3g

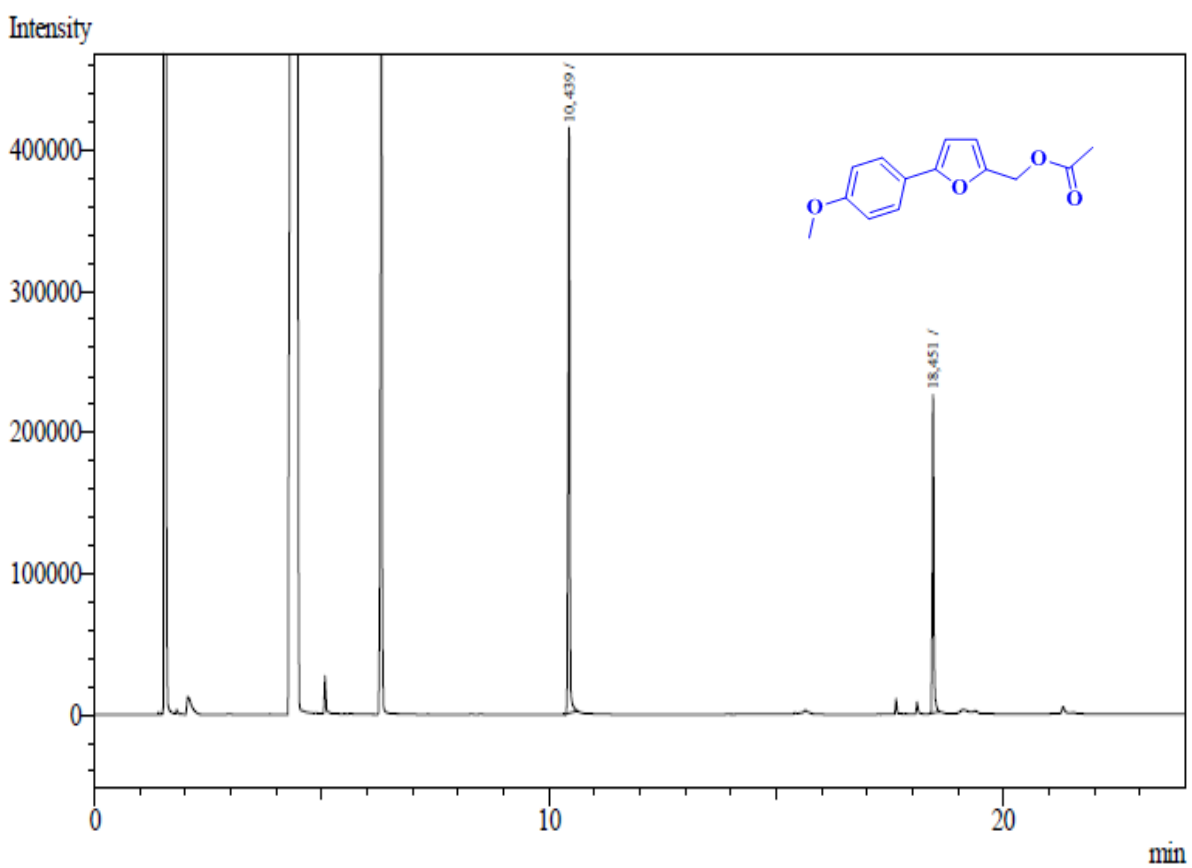

3h

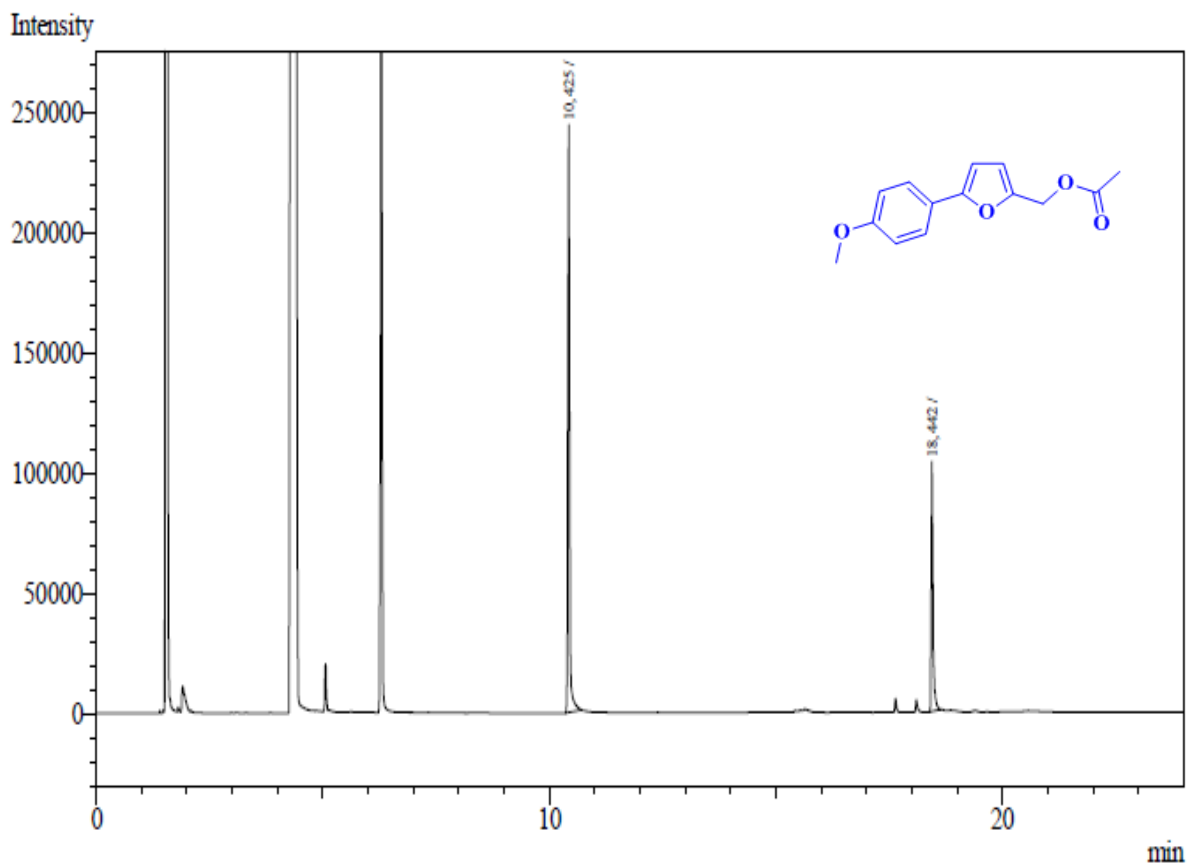

3i

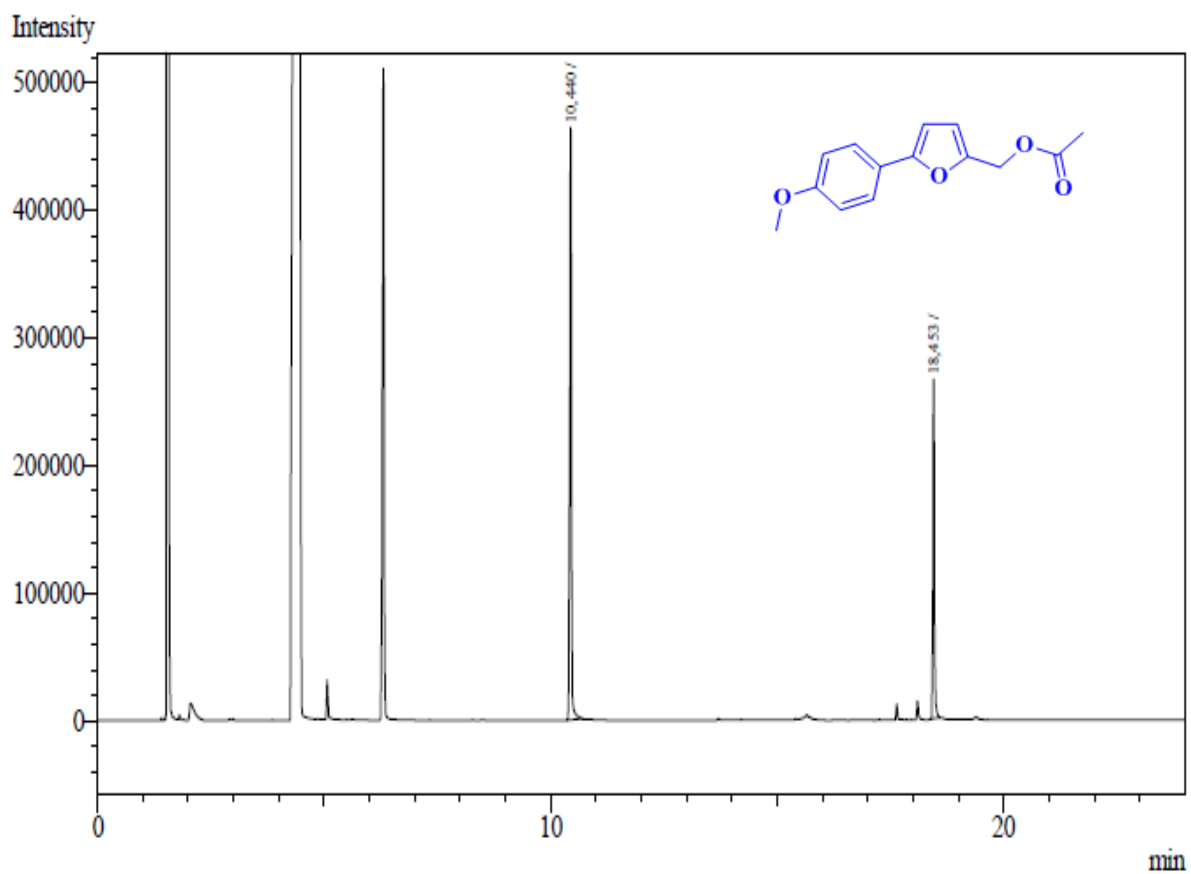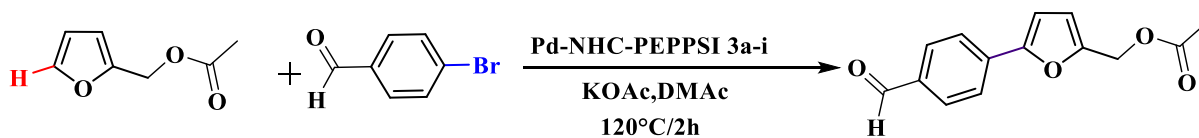

3a

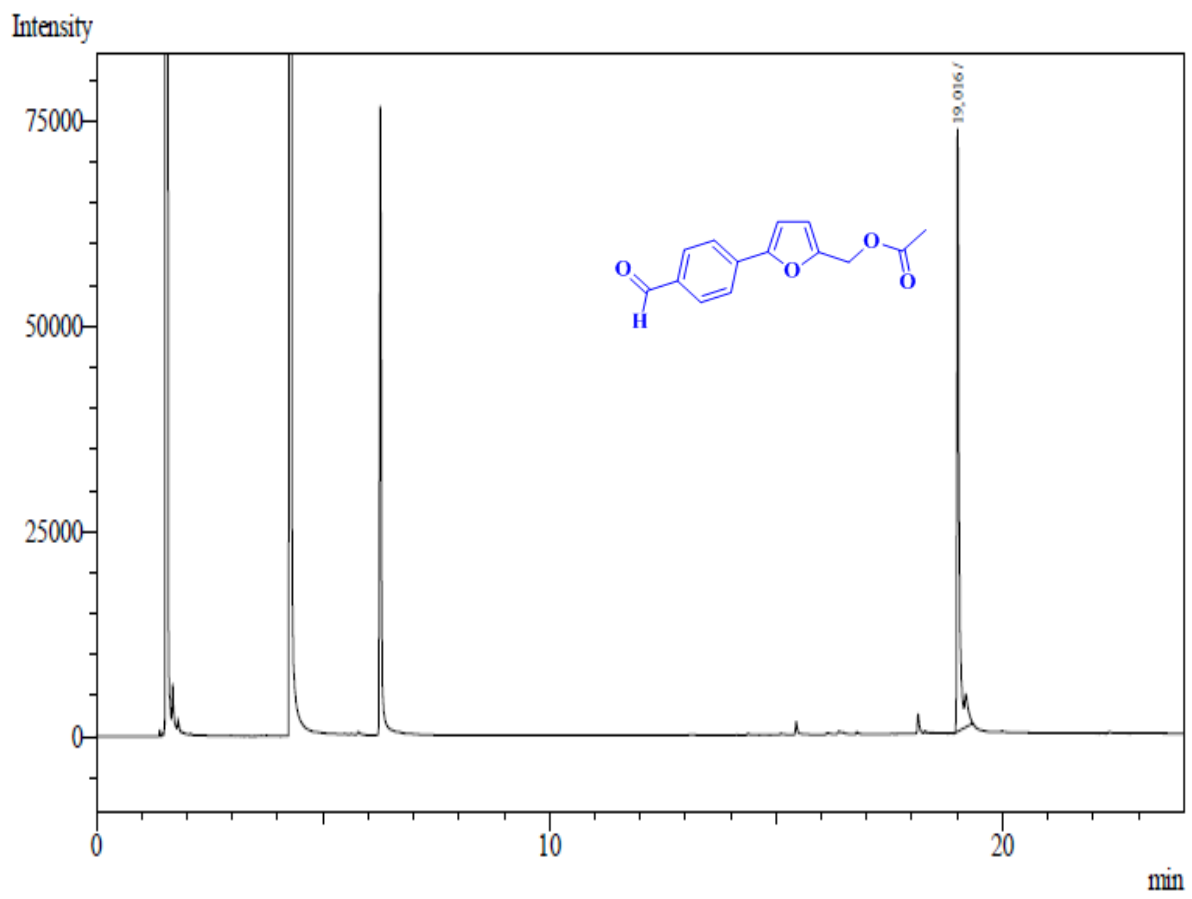

3b

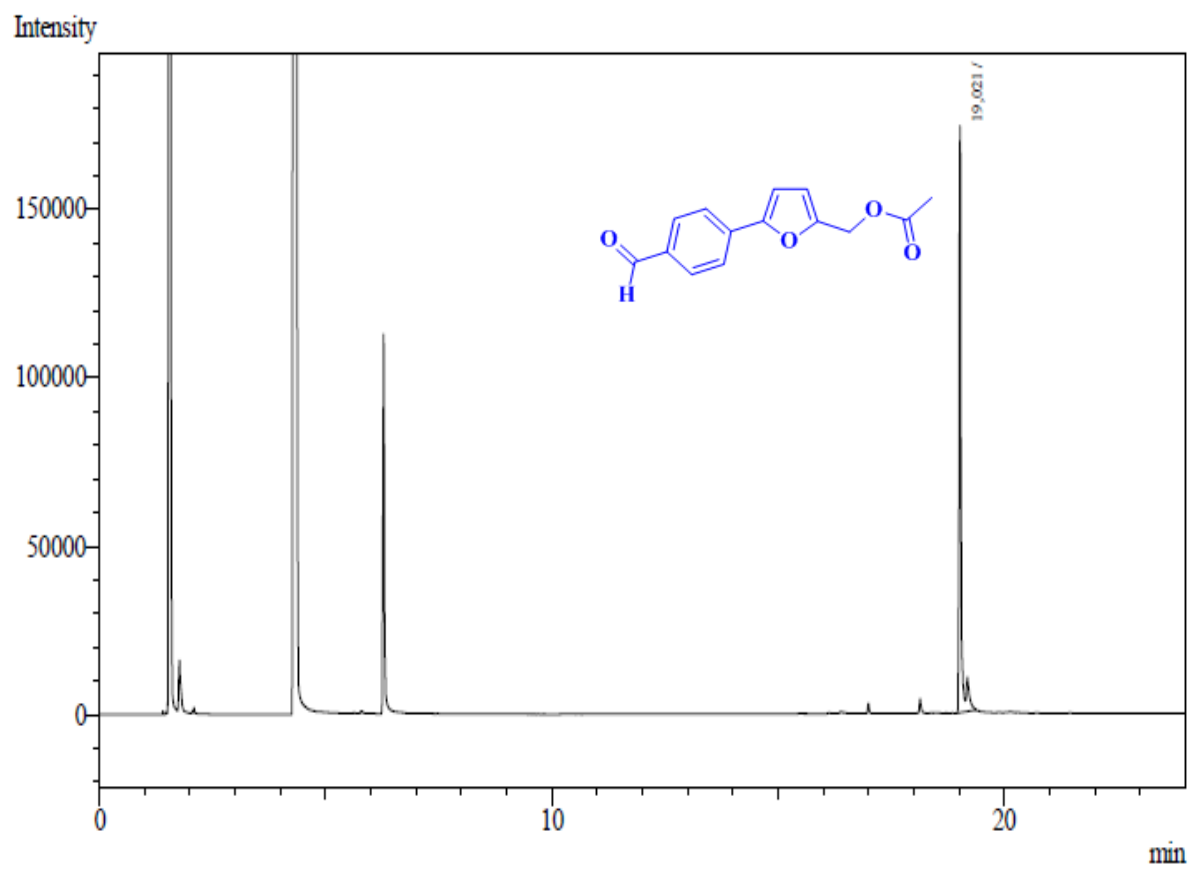

3c

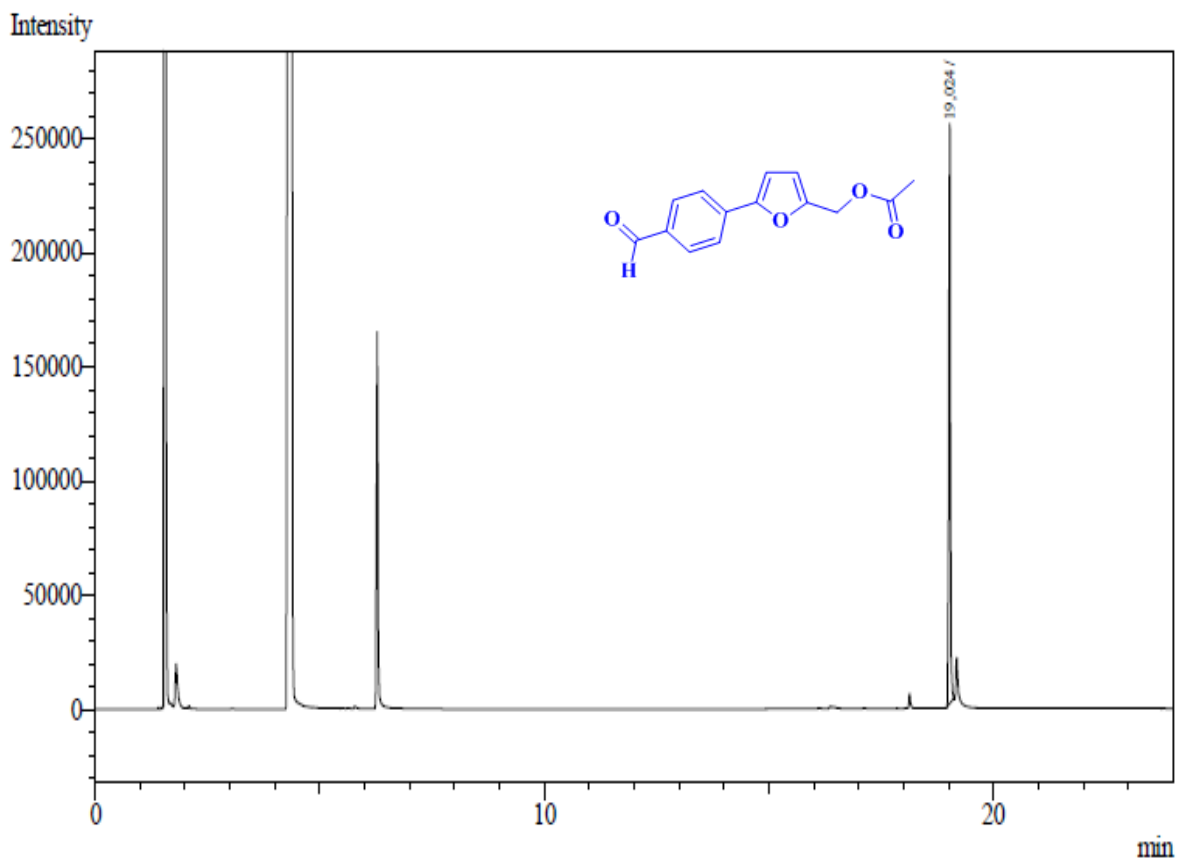

3d

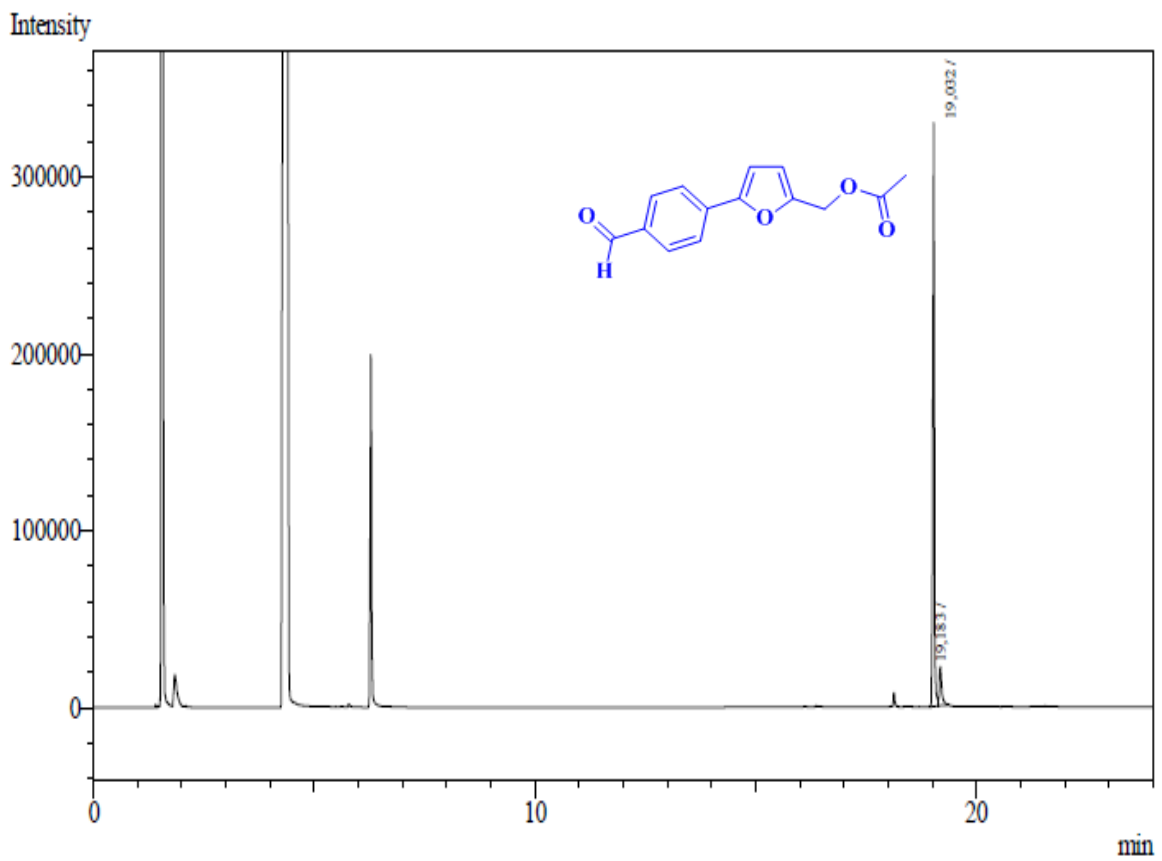

3e

Intensity

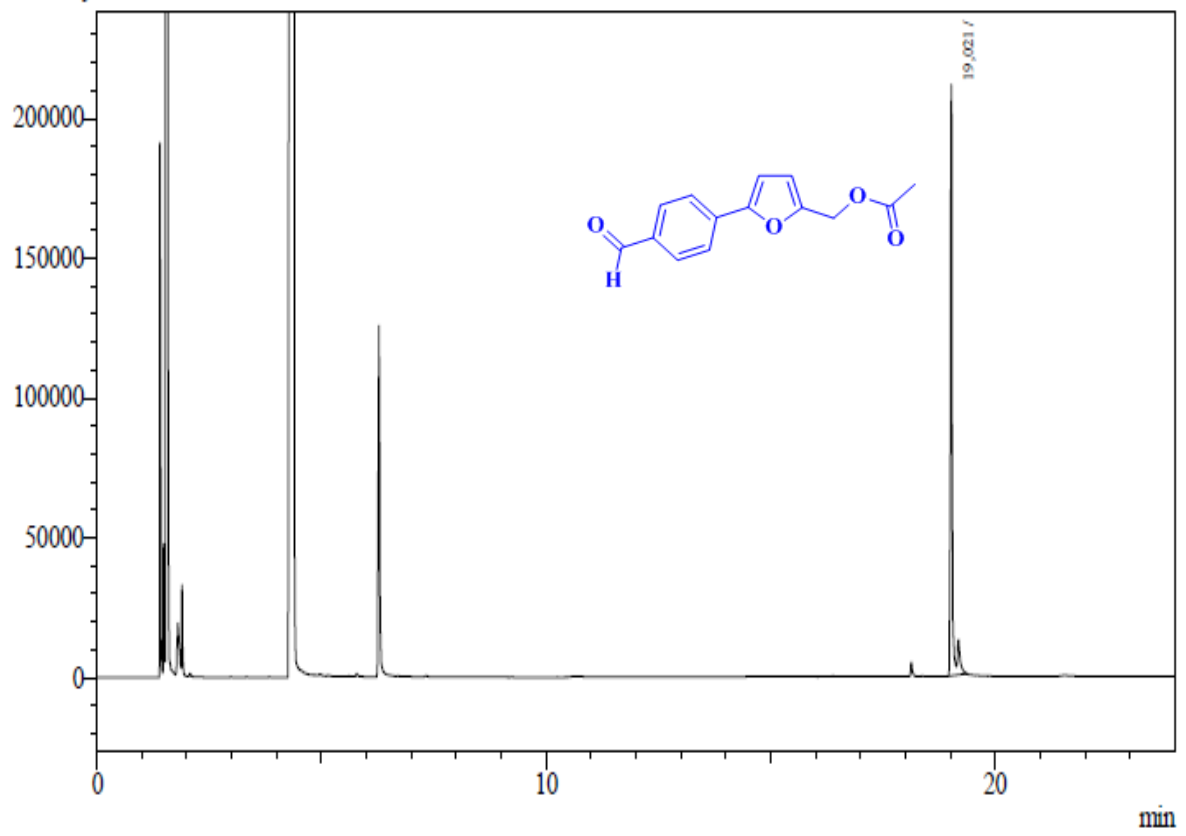

2f

Intensity

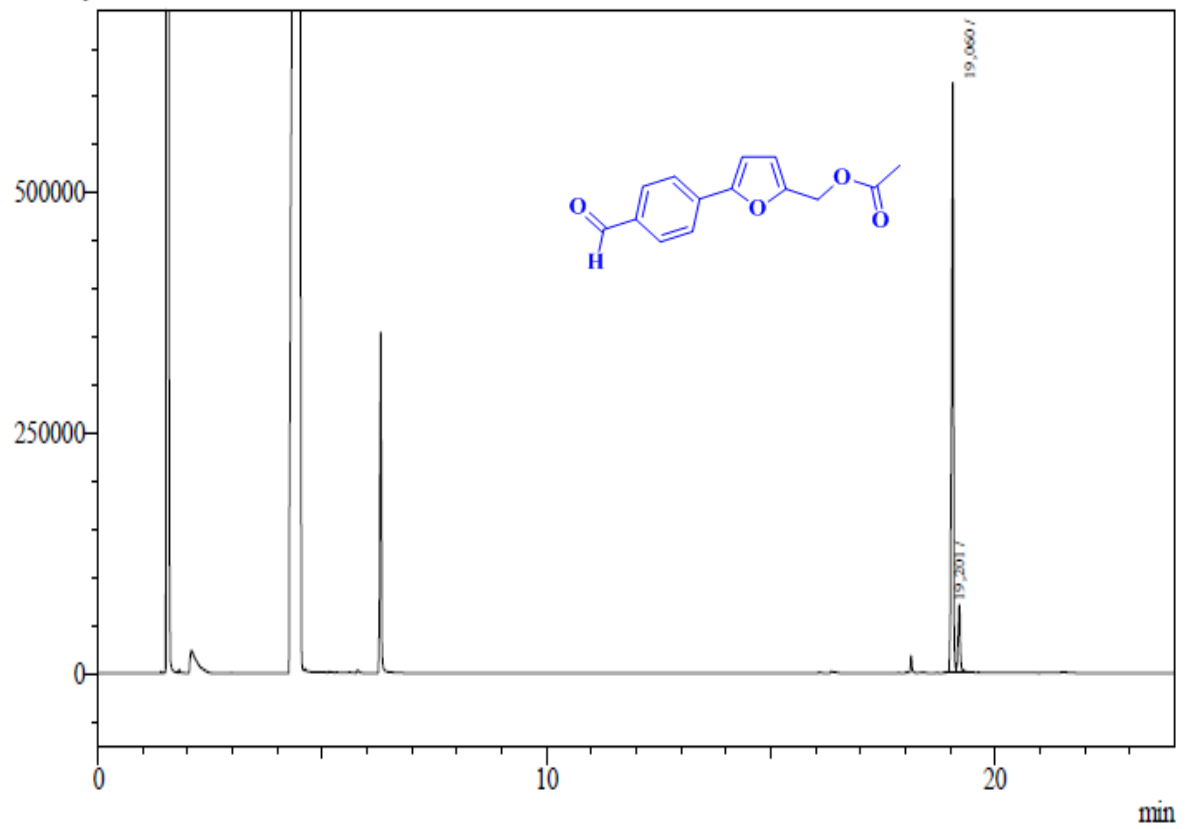

3g



Intensity

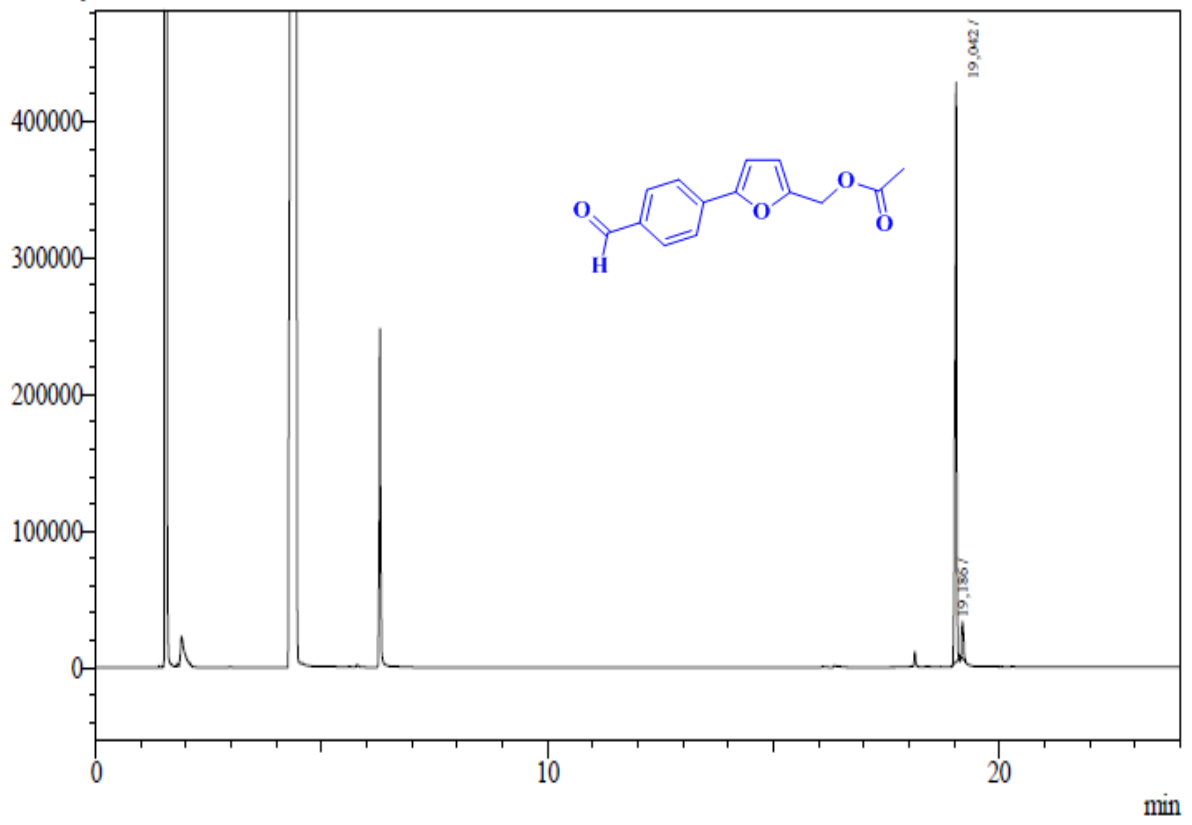

3h

Intensity

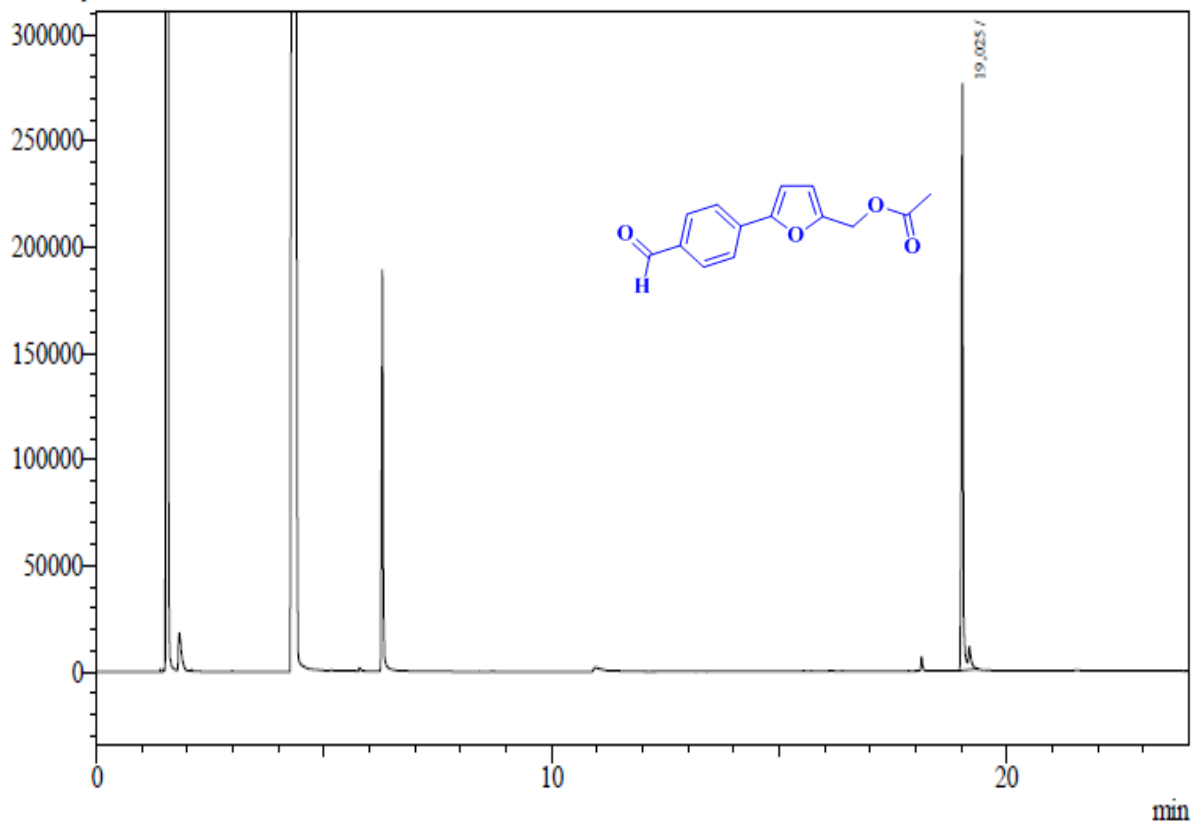

3i

Intensity

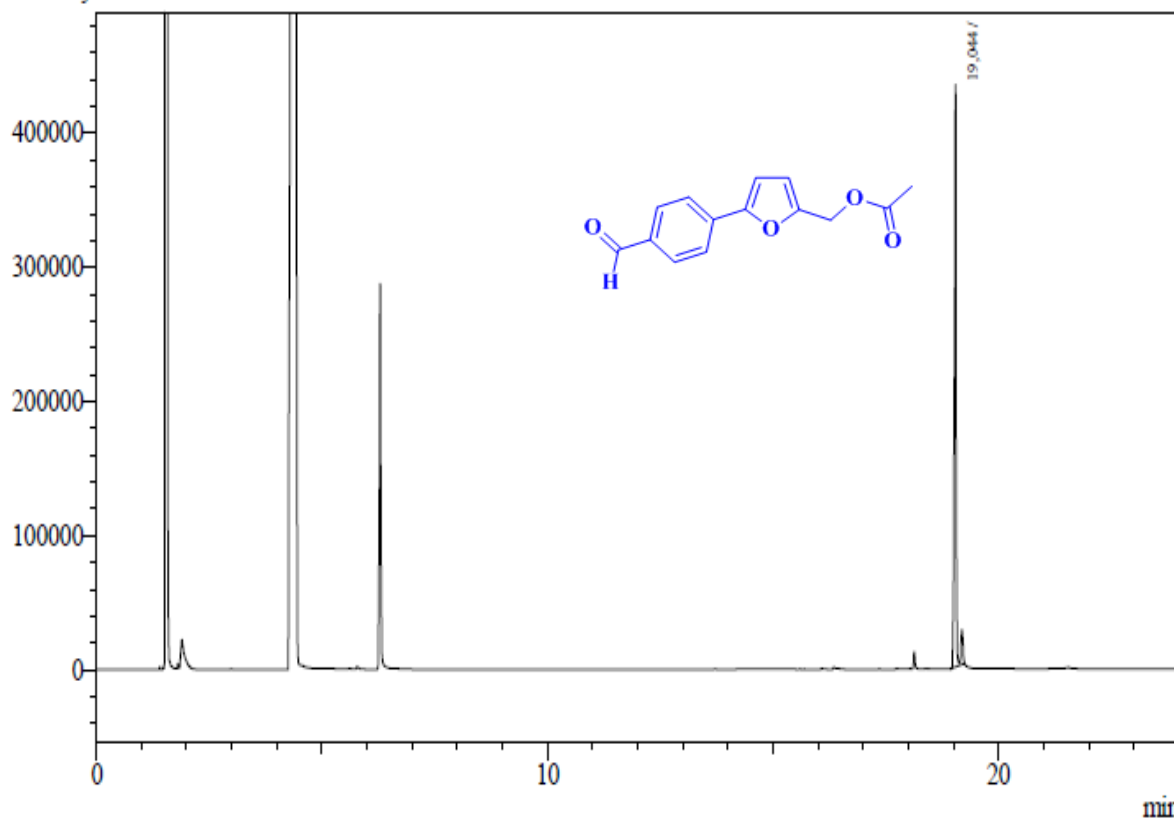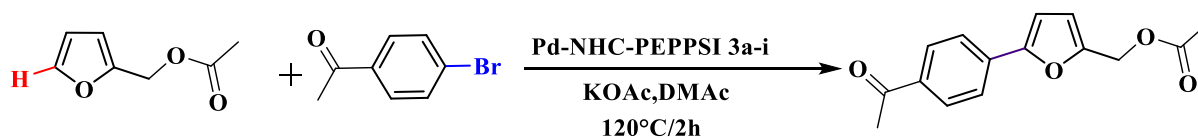

3a

Intensity

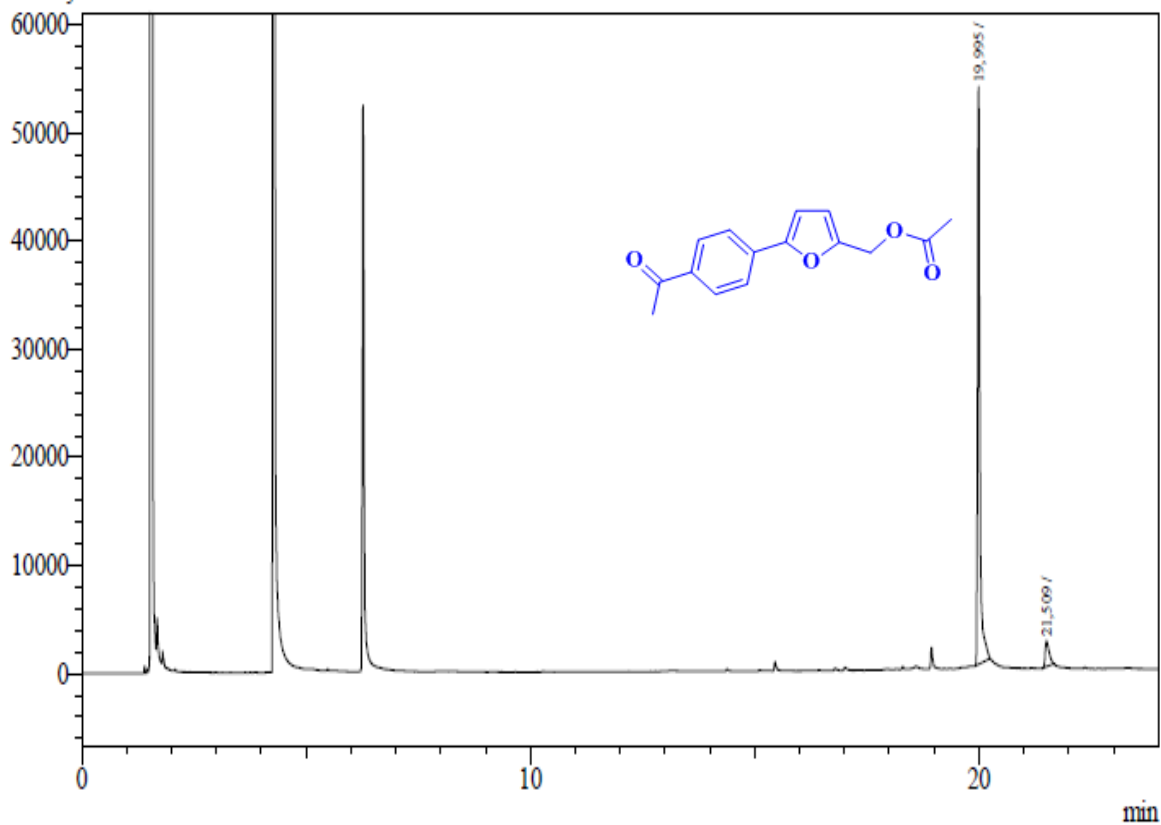

3b

Intensity

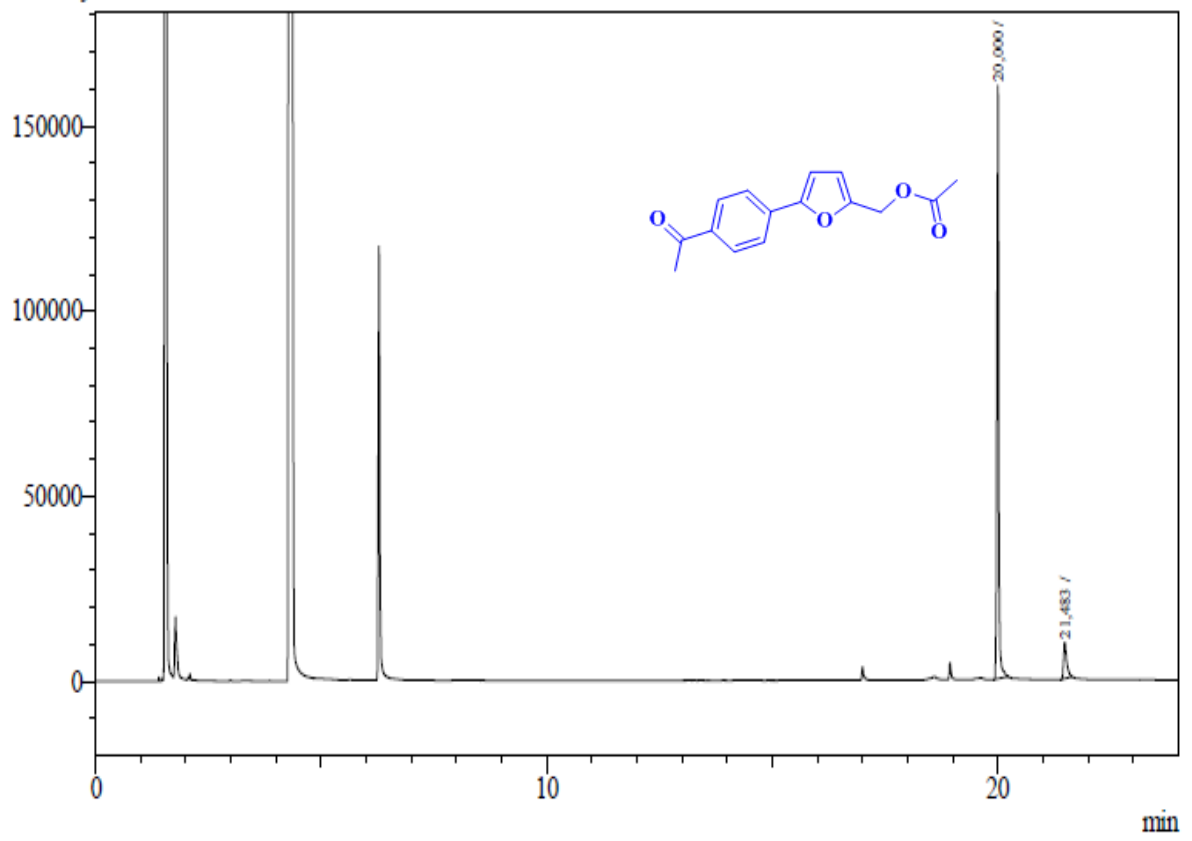

3c

Intensity

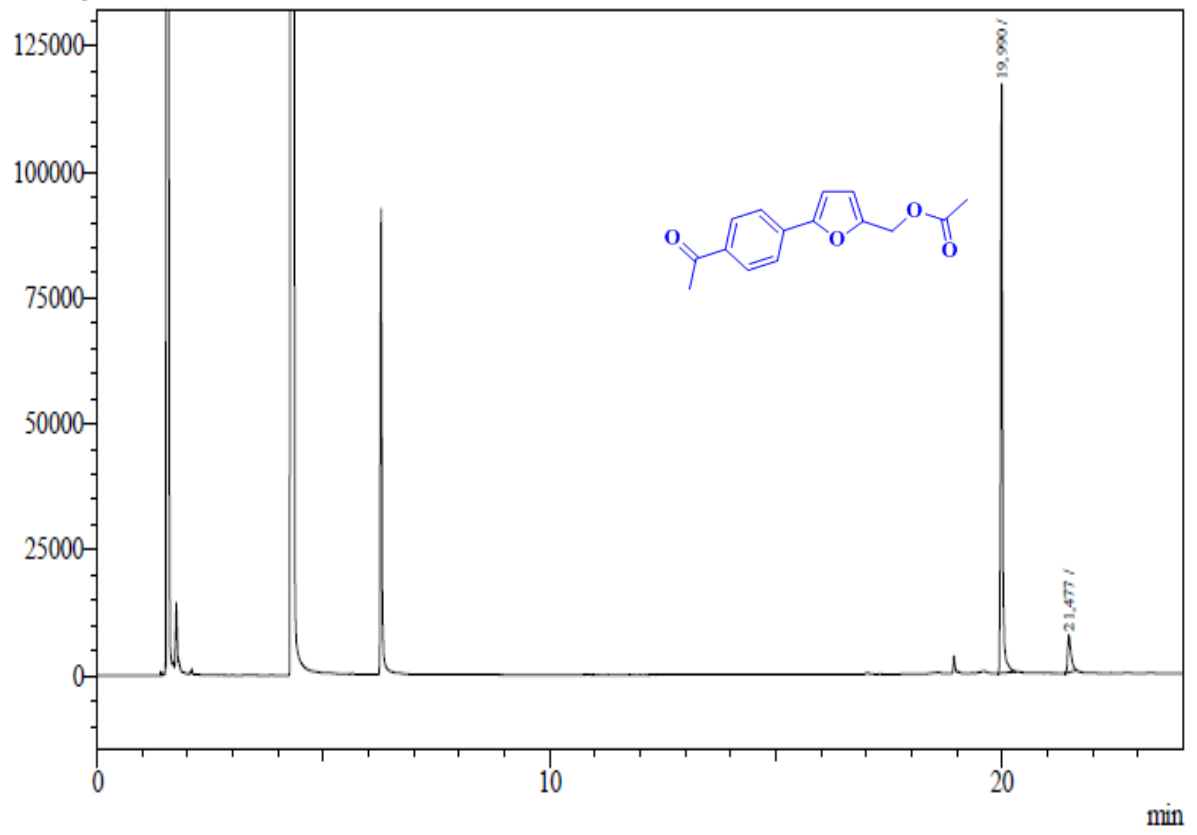

3d

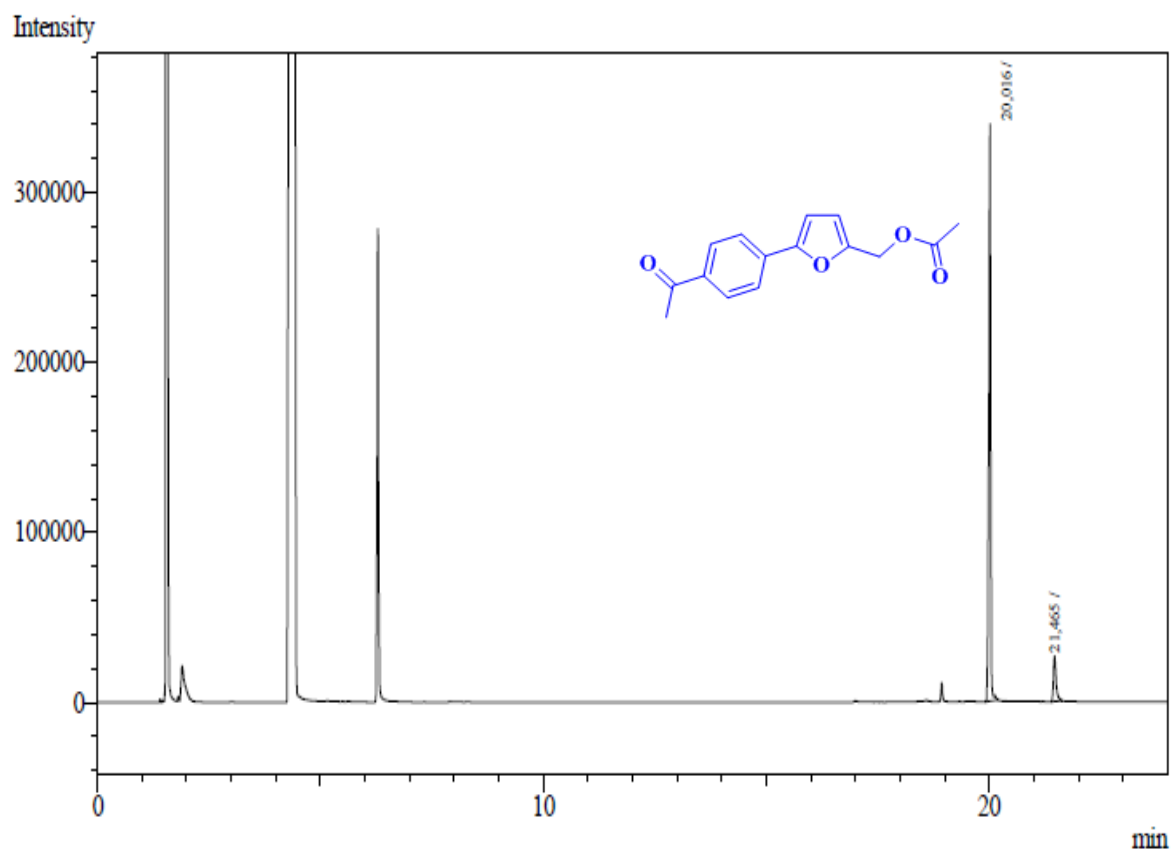

3e

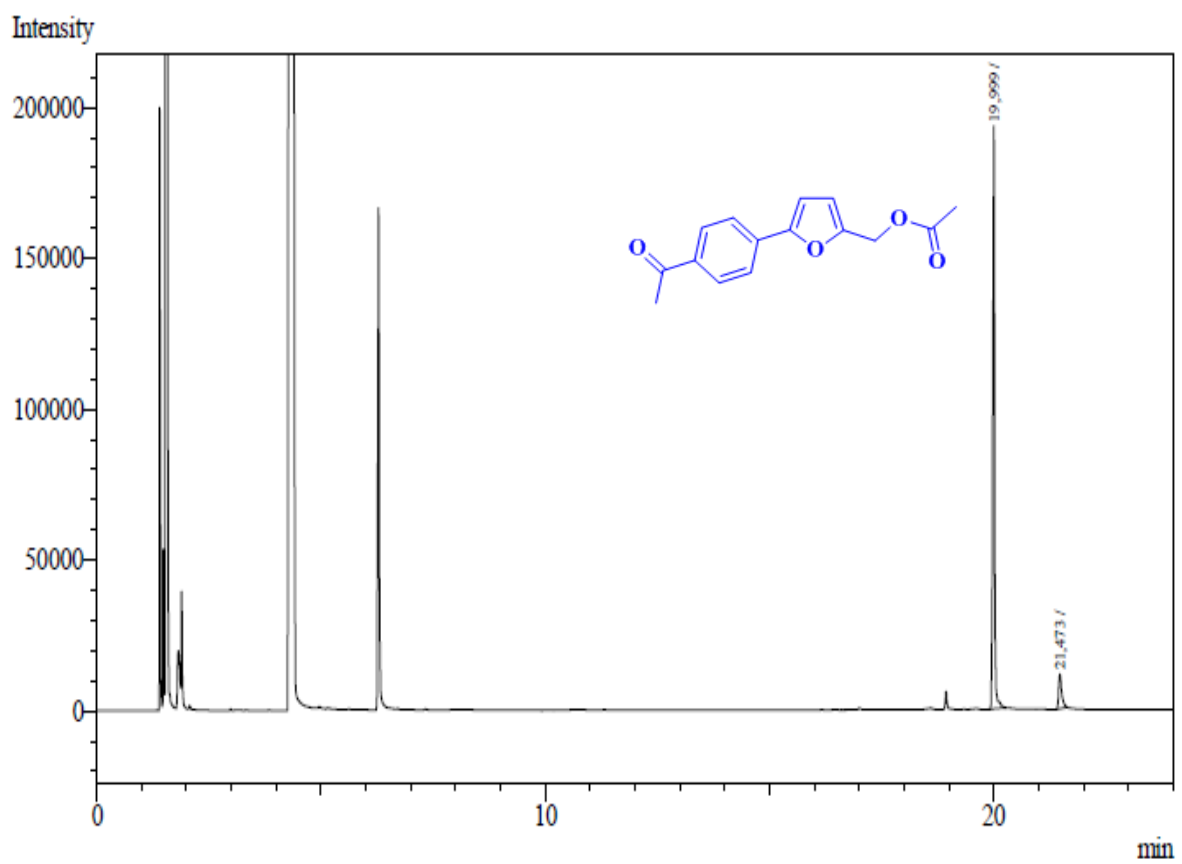

3f

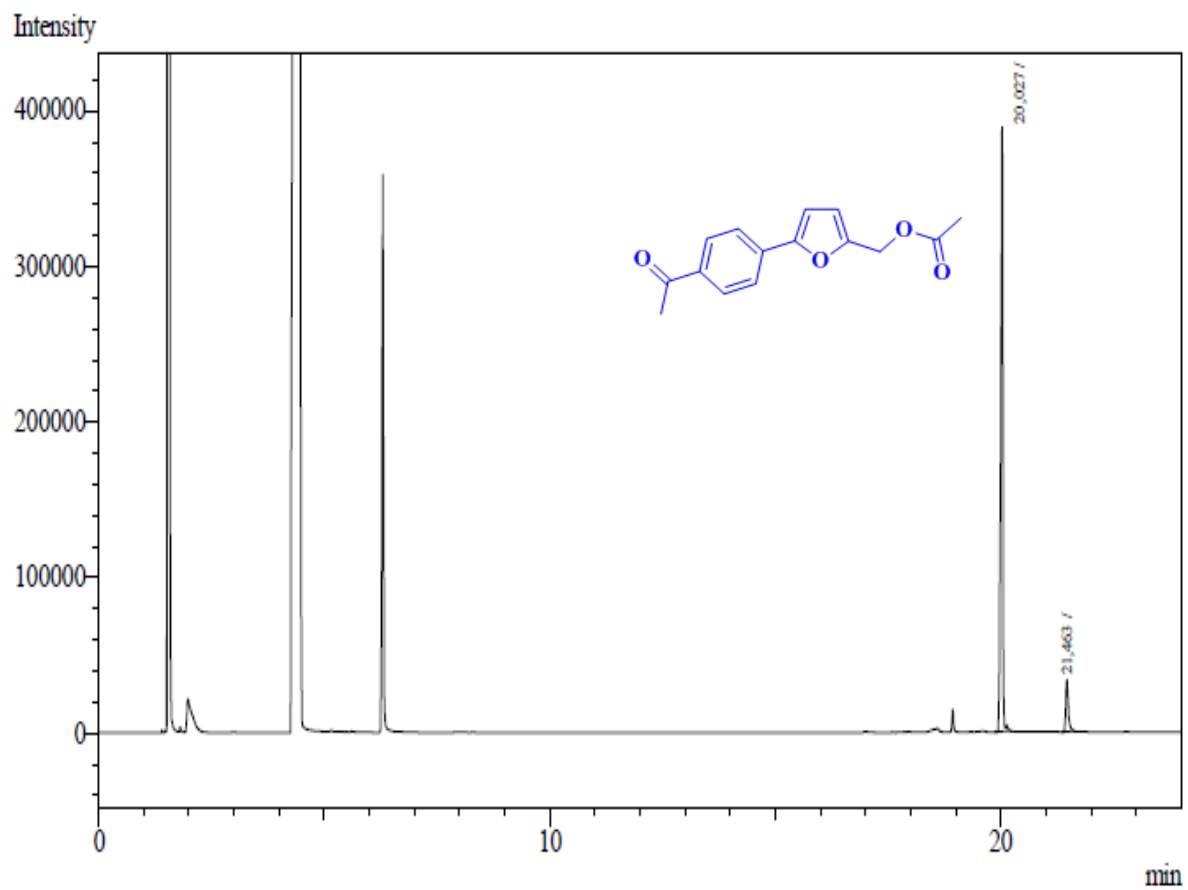

3g

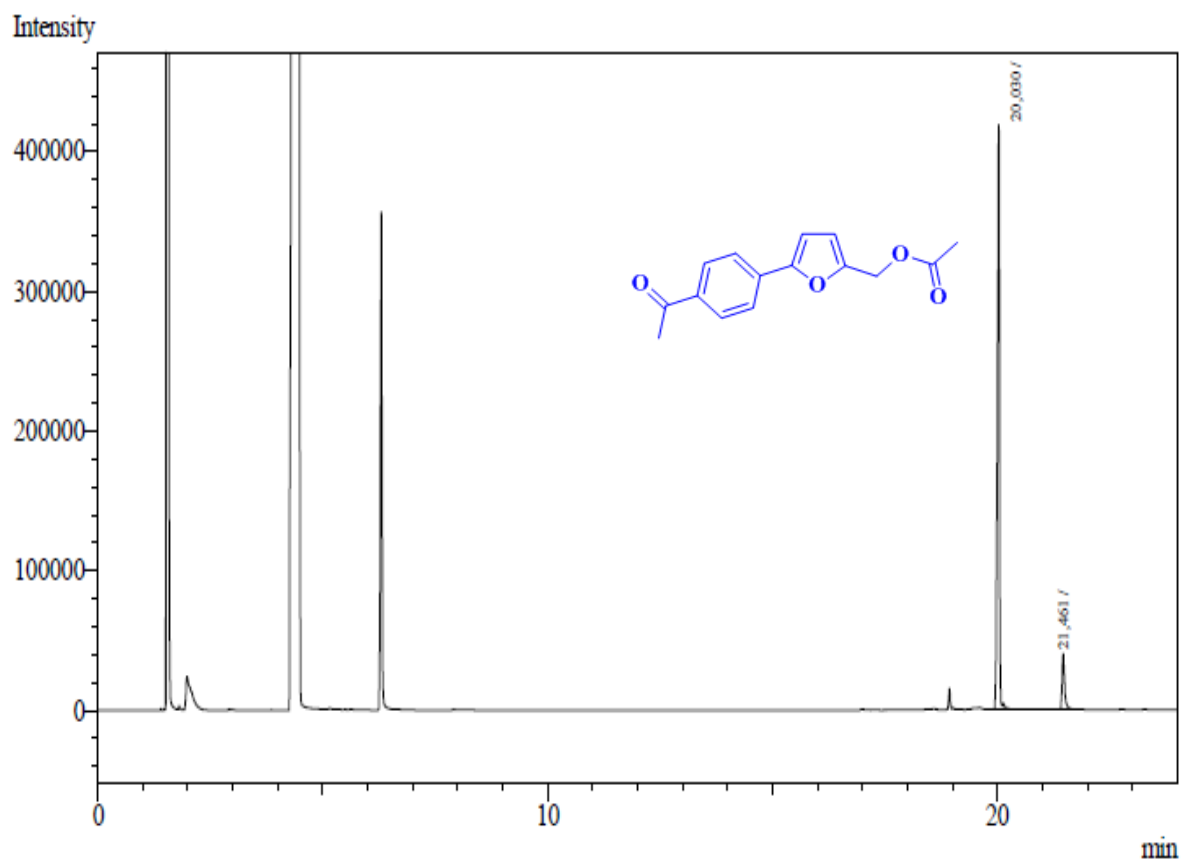

3h

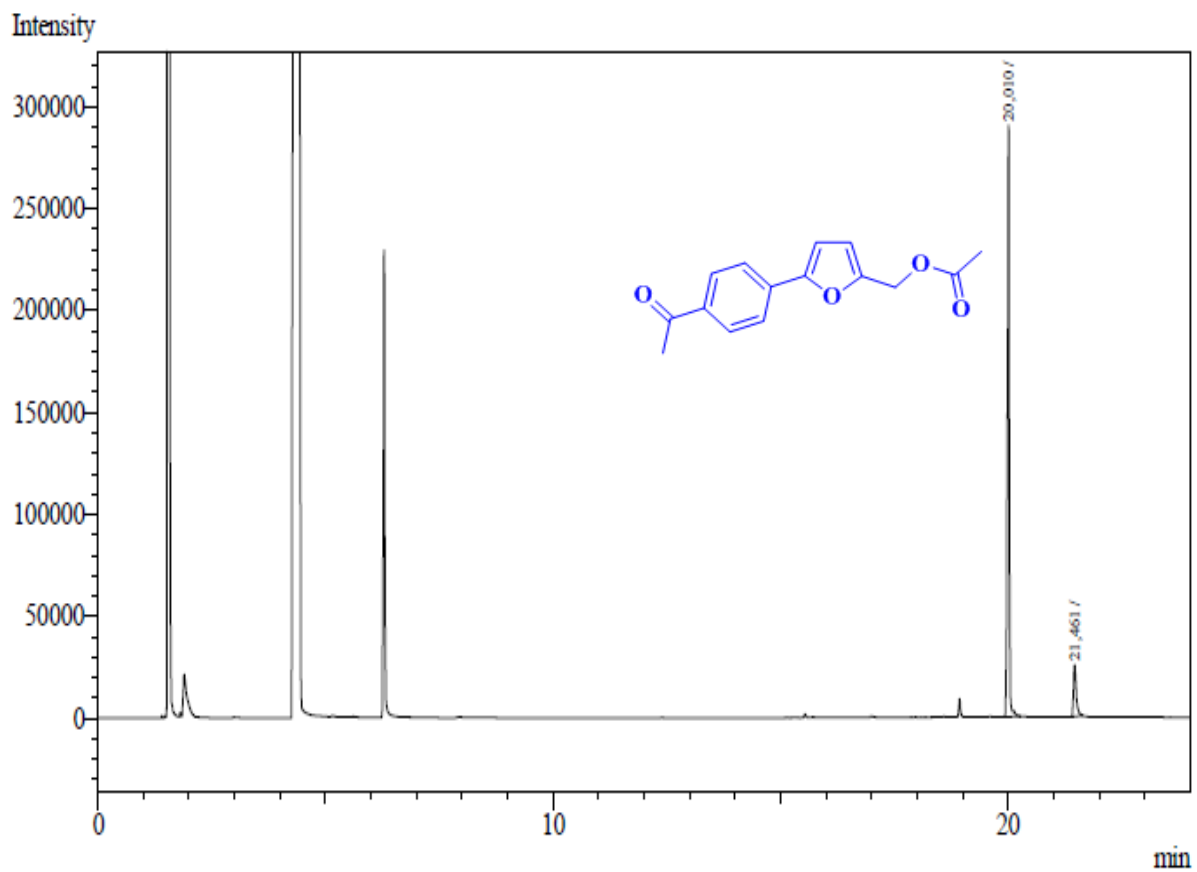

3i

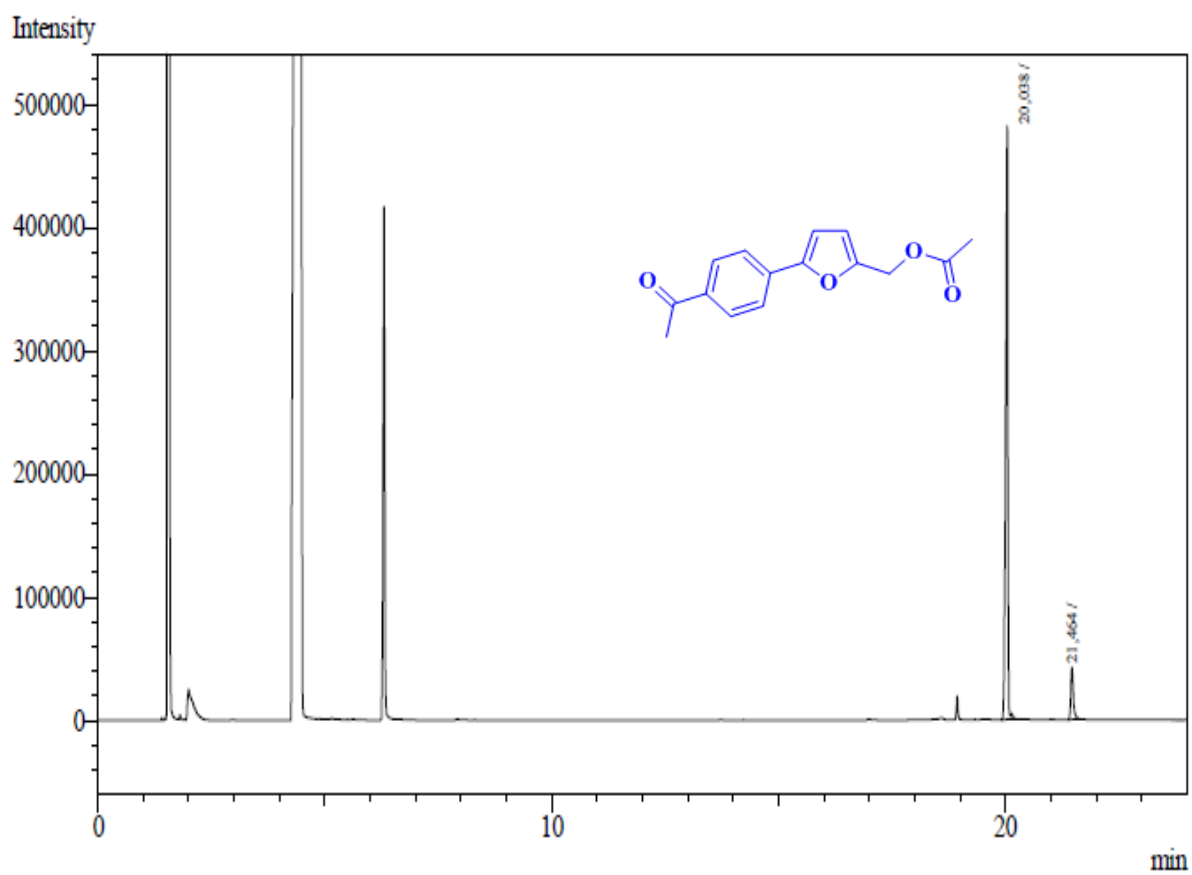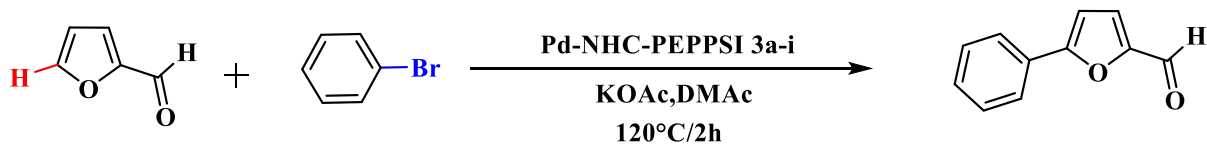

3a

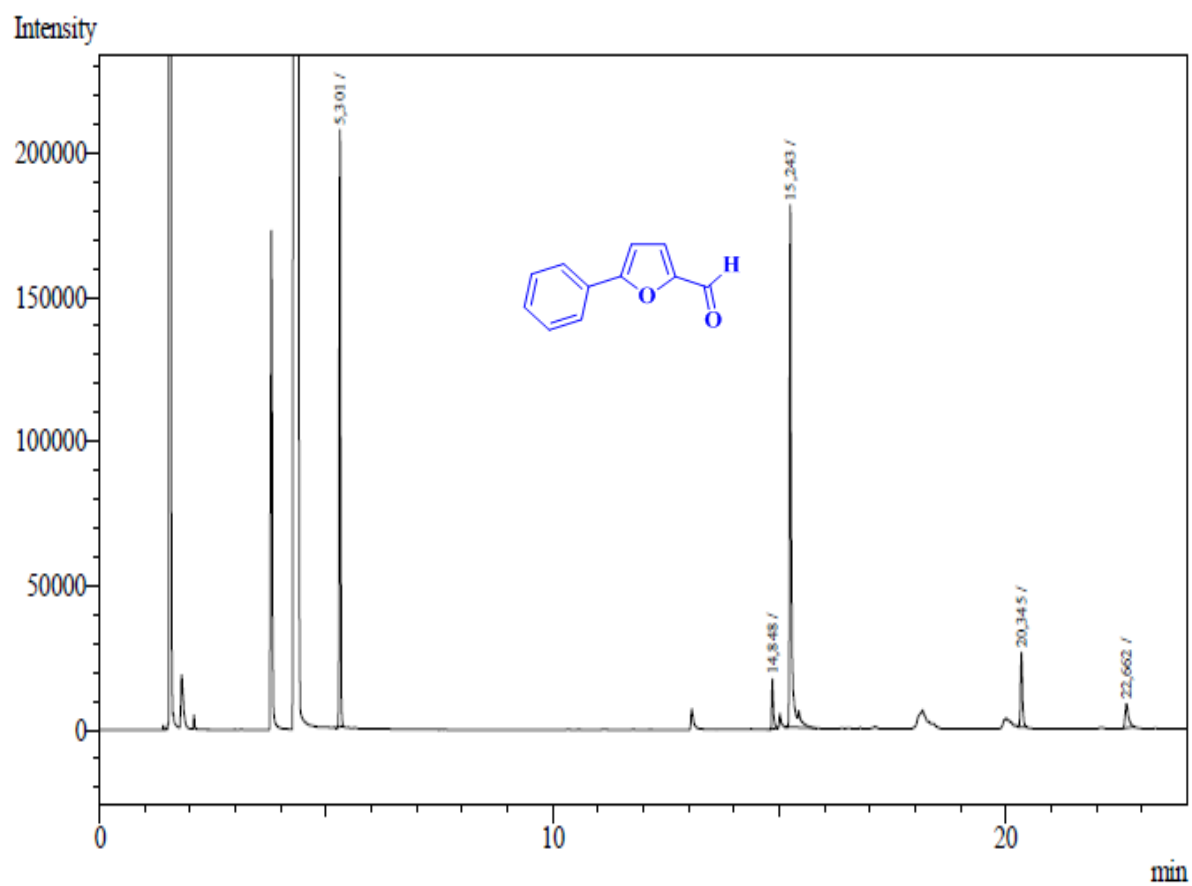

3b

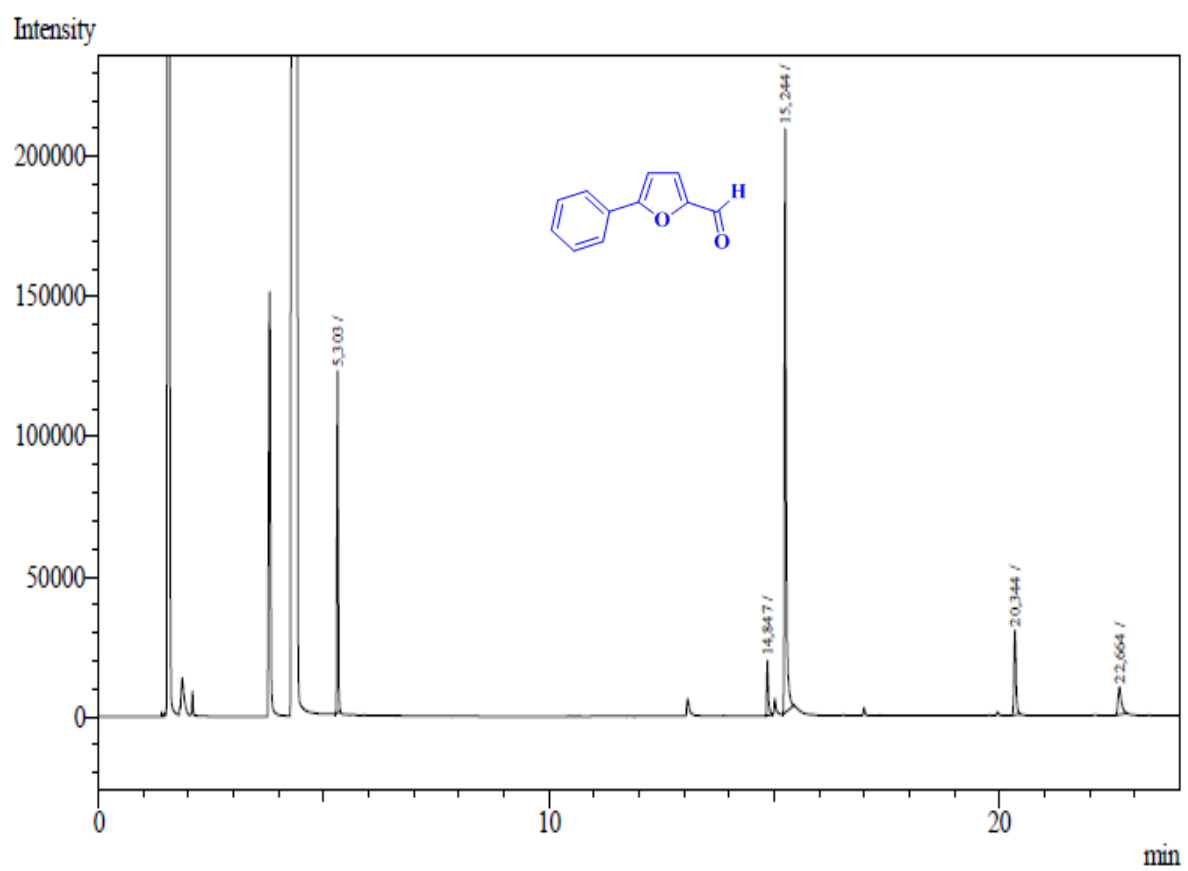

3c

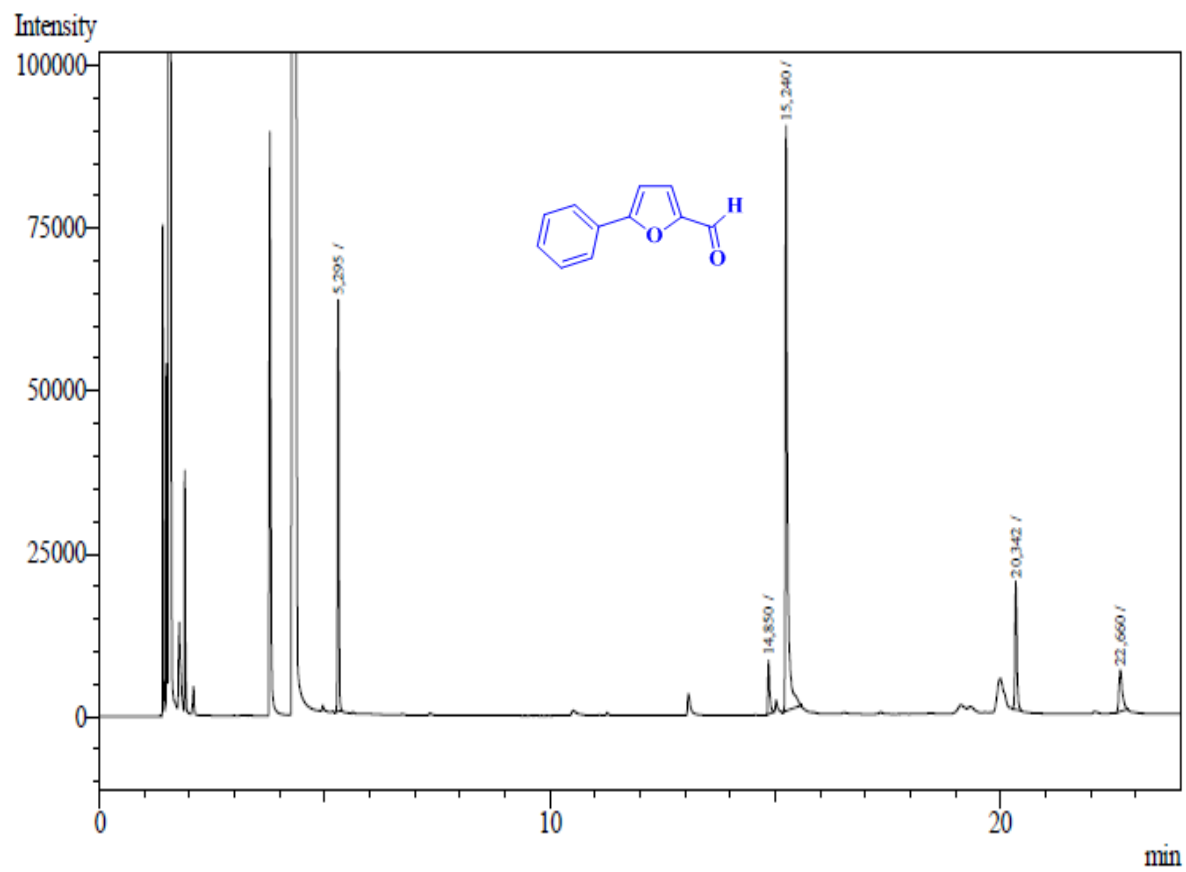

3d

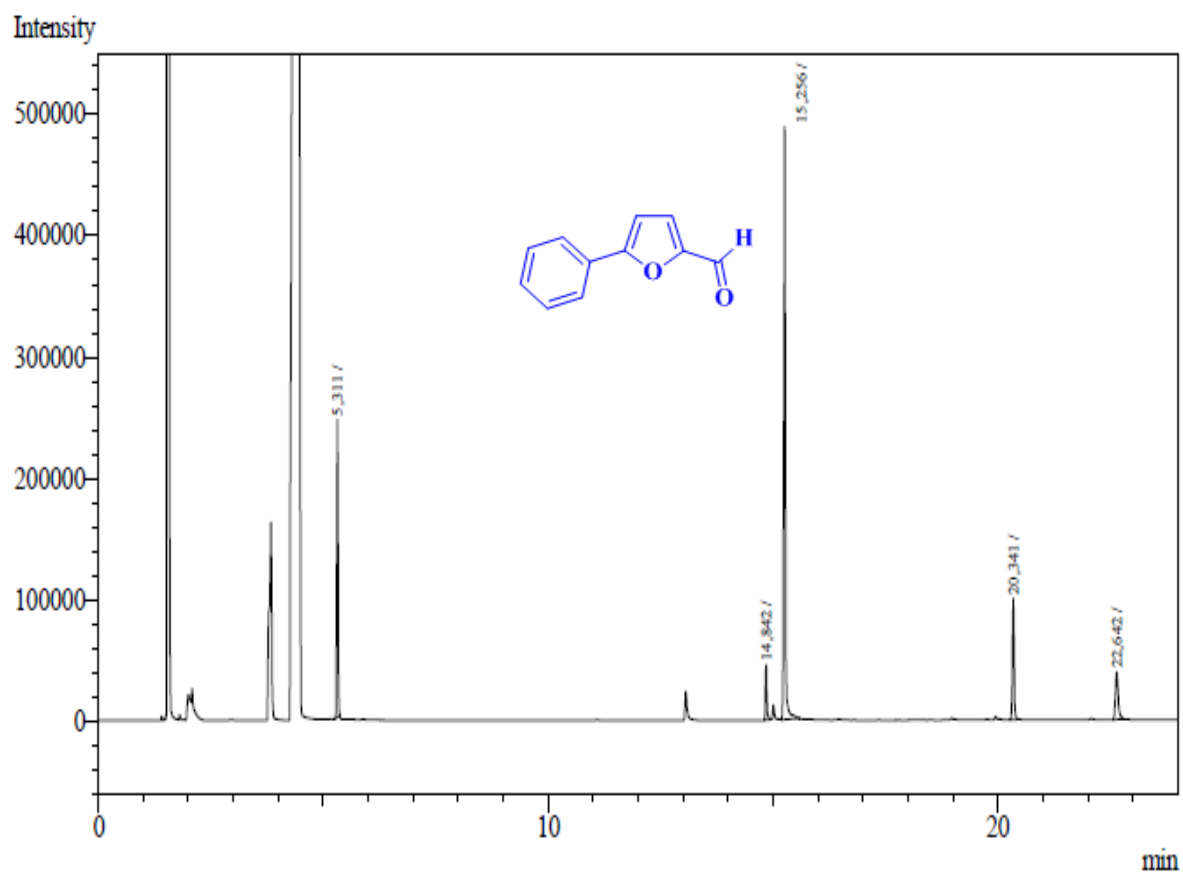

3e



Intensity

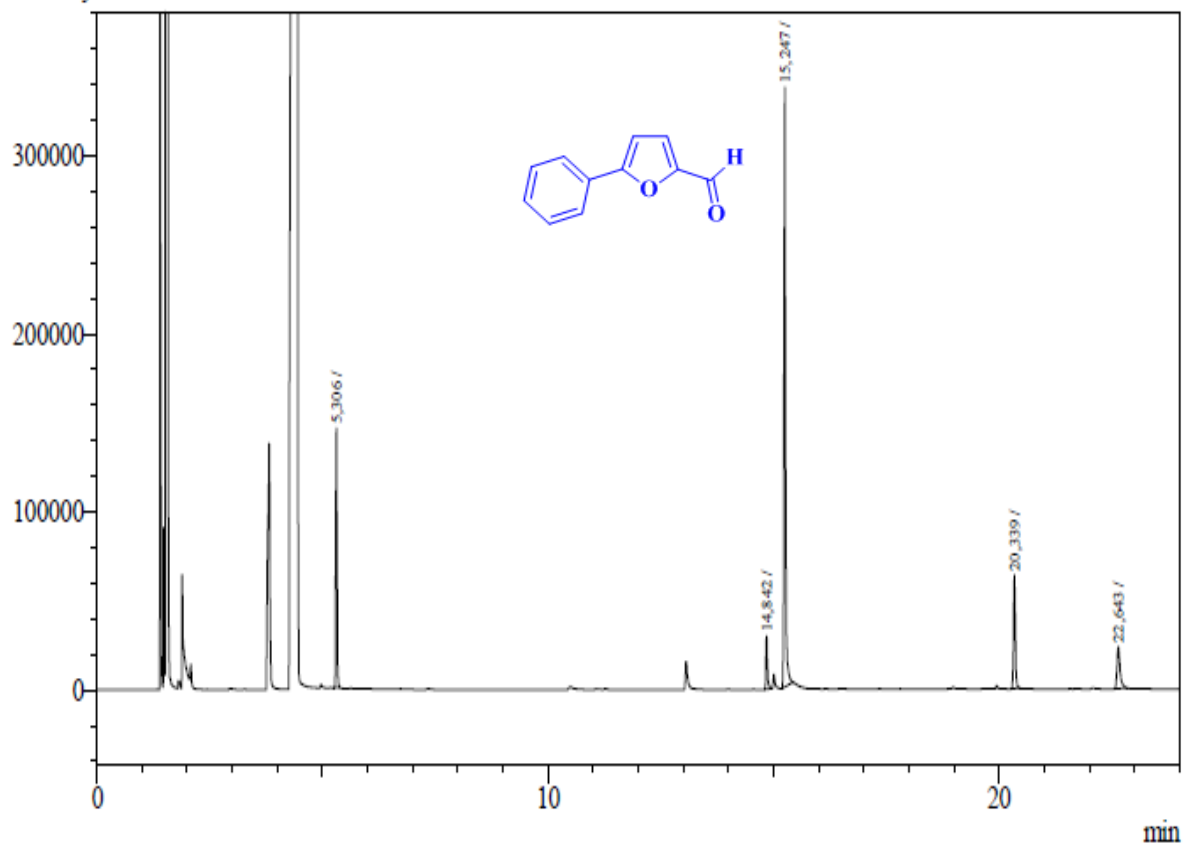

3f

Intensity

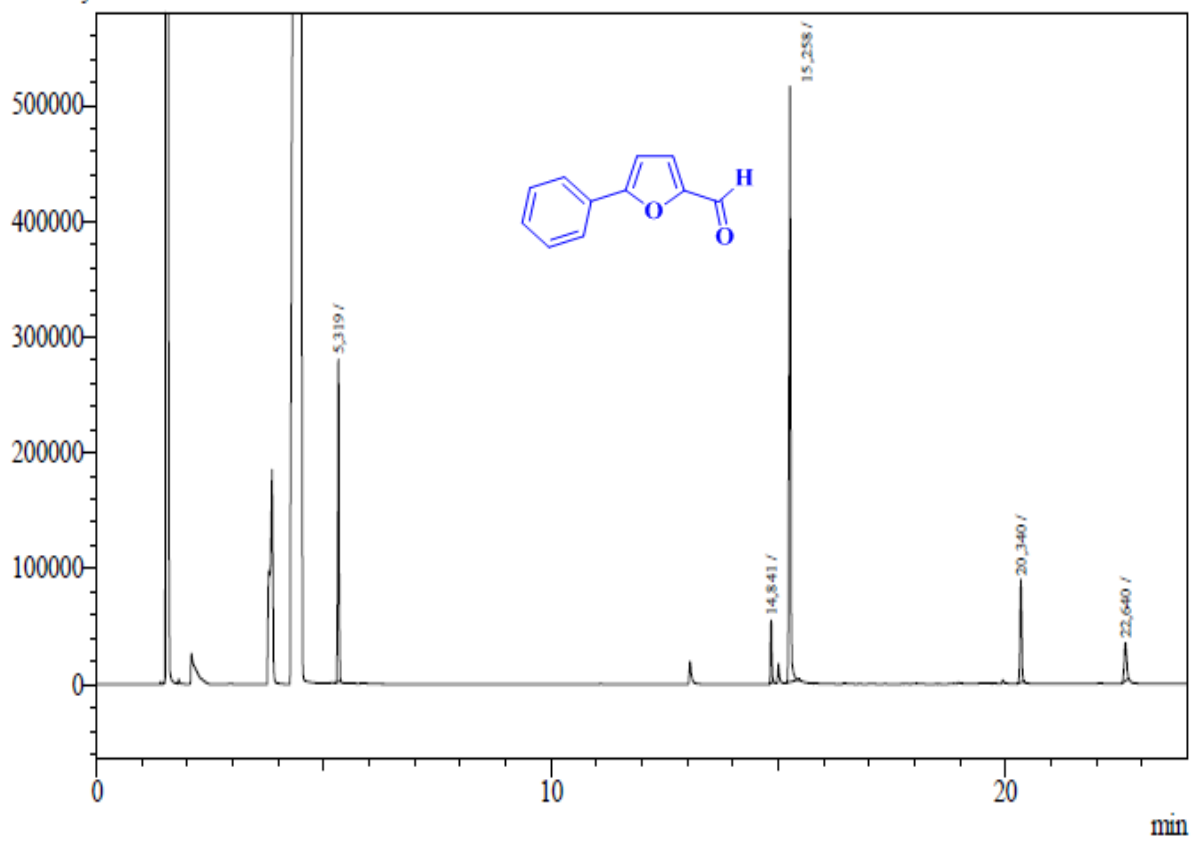

3g

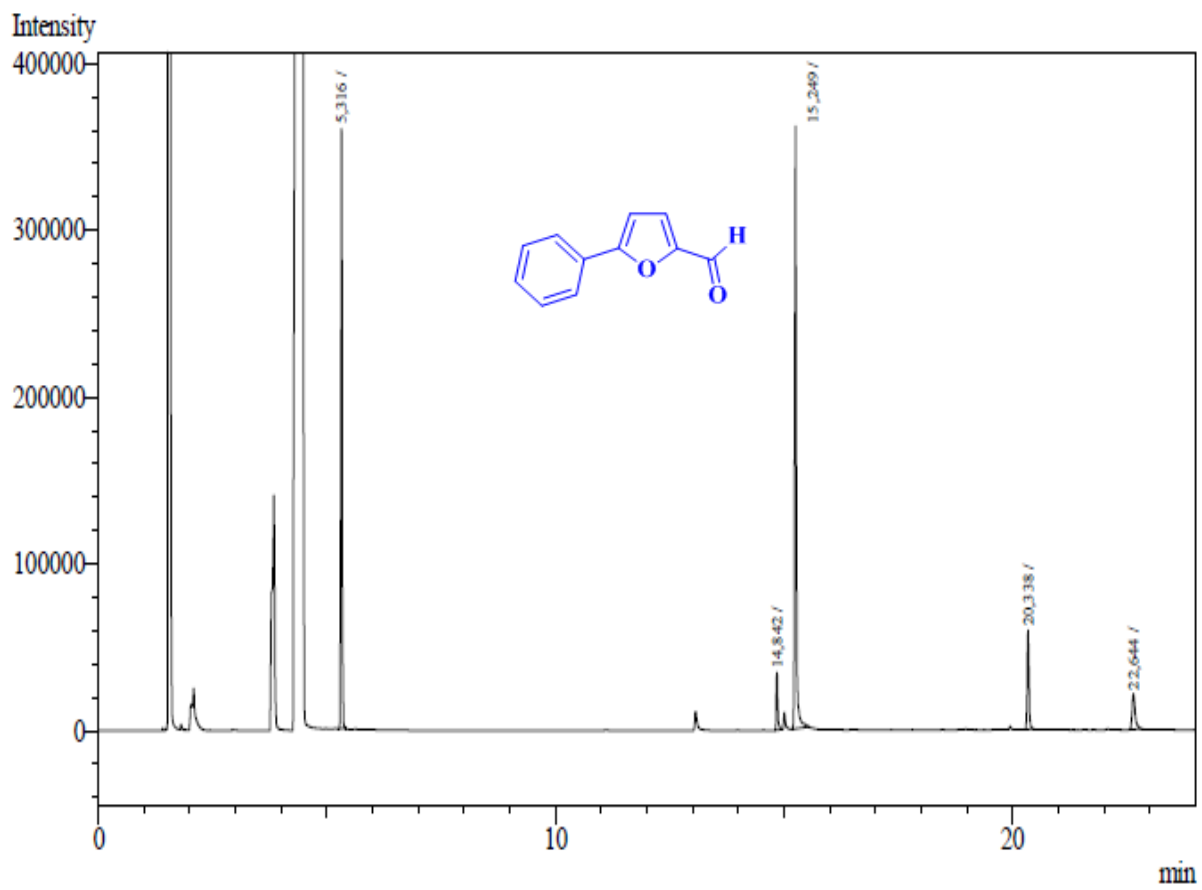

3h

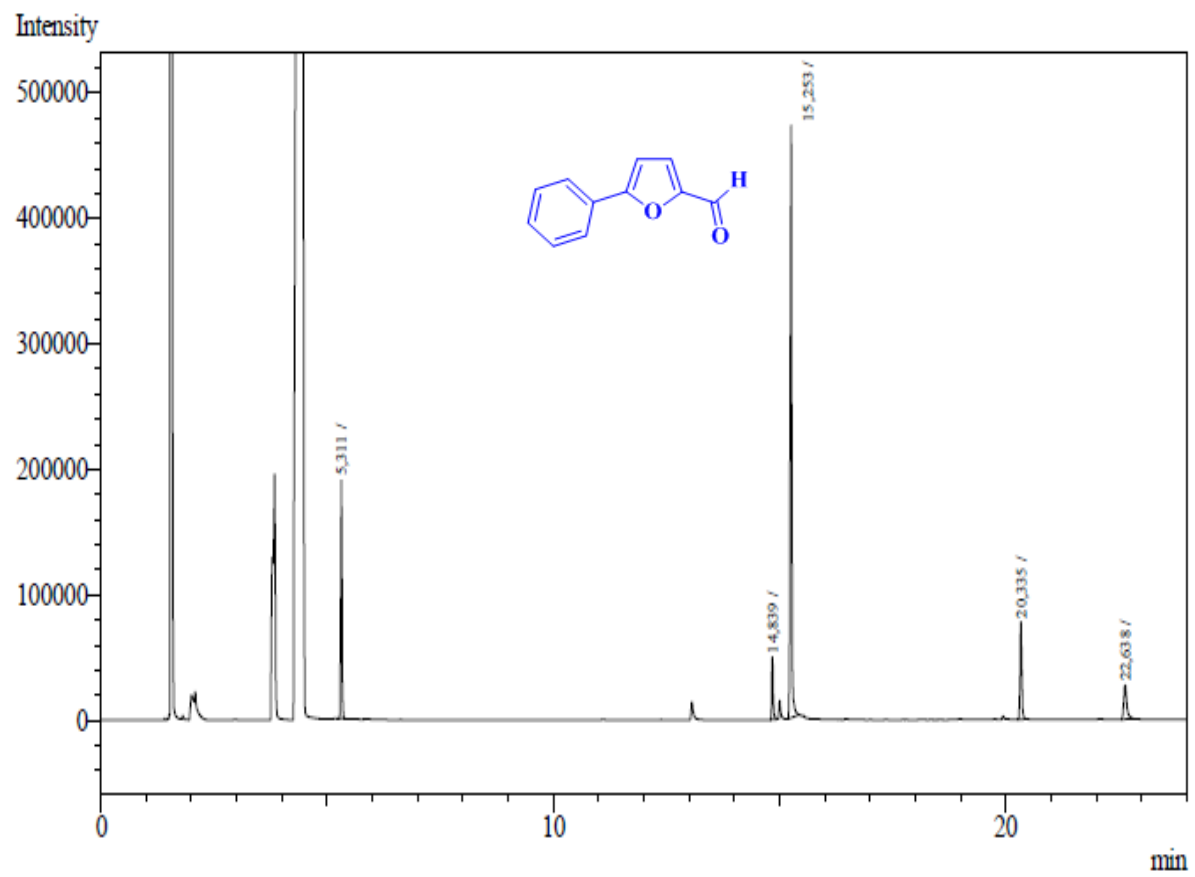

3i

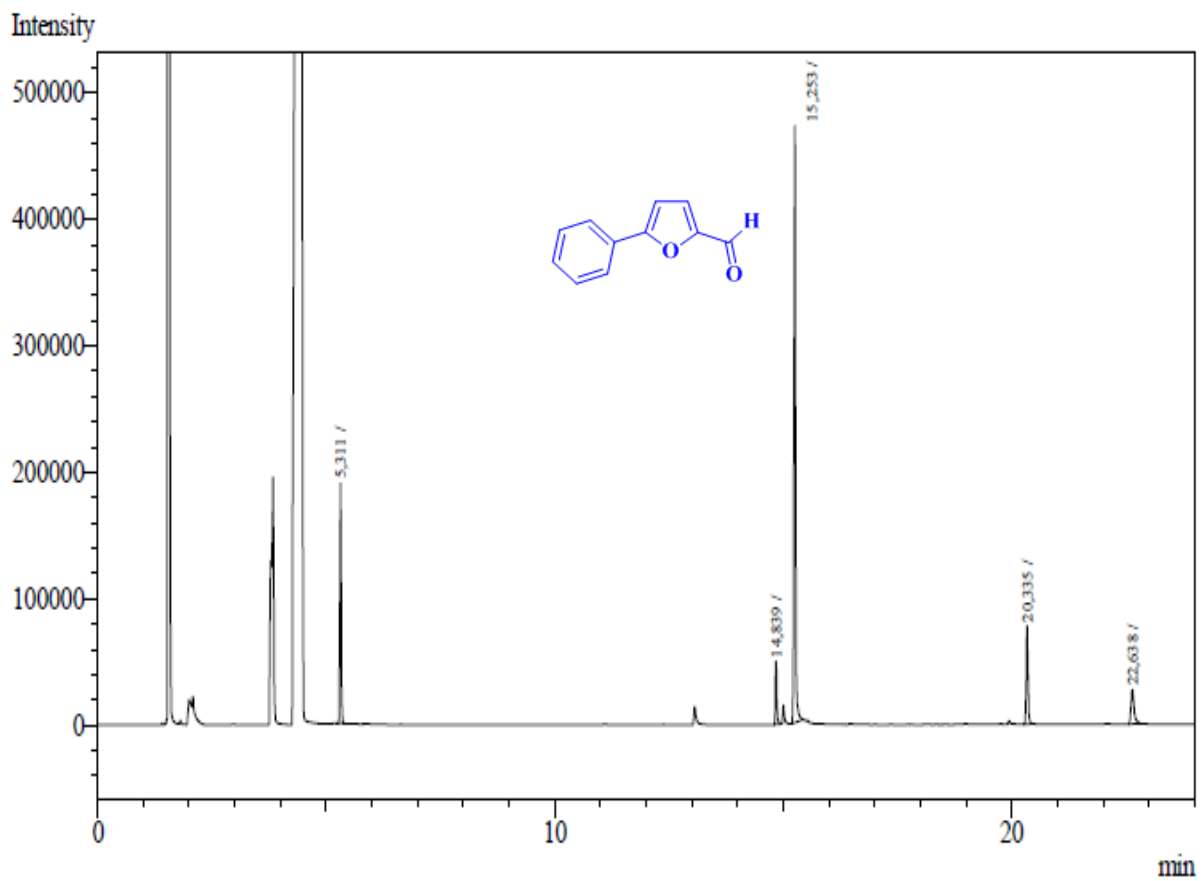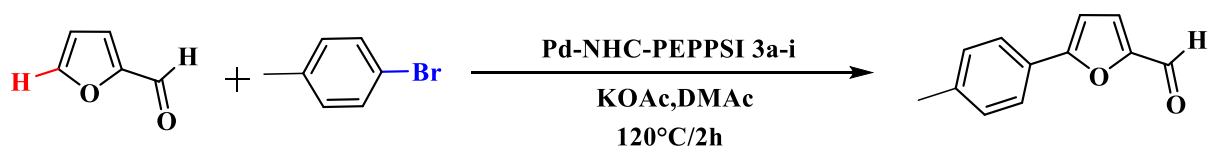

3a

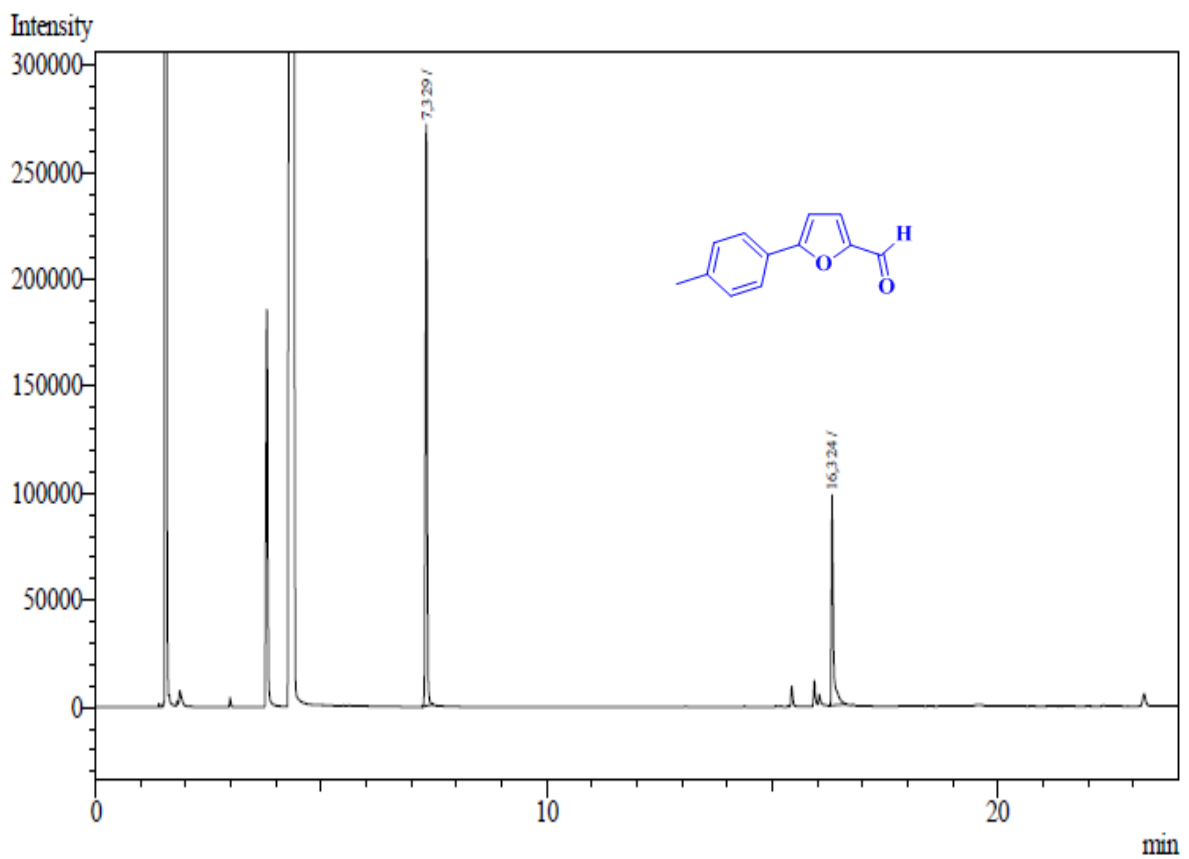

3b

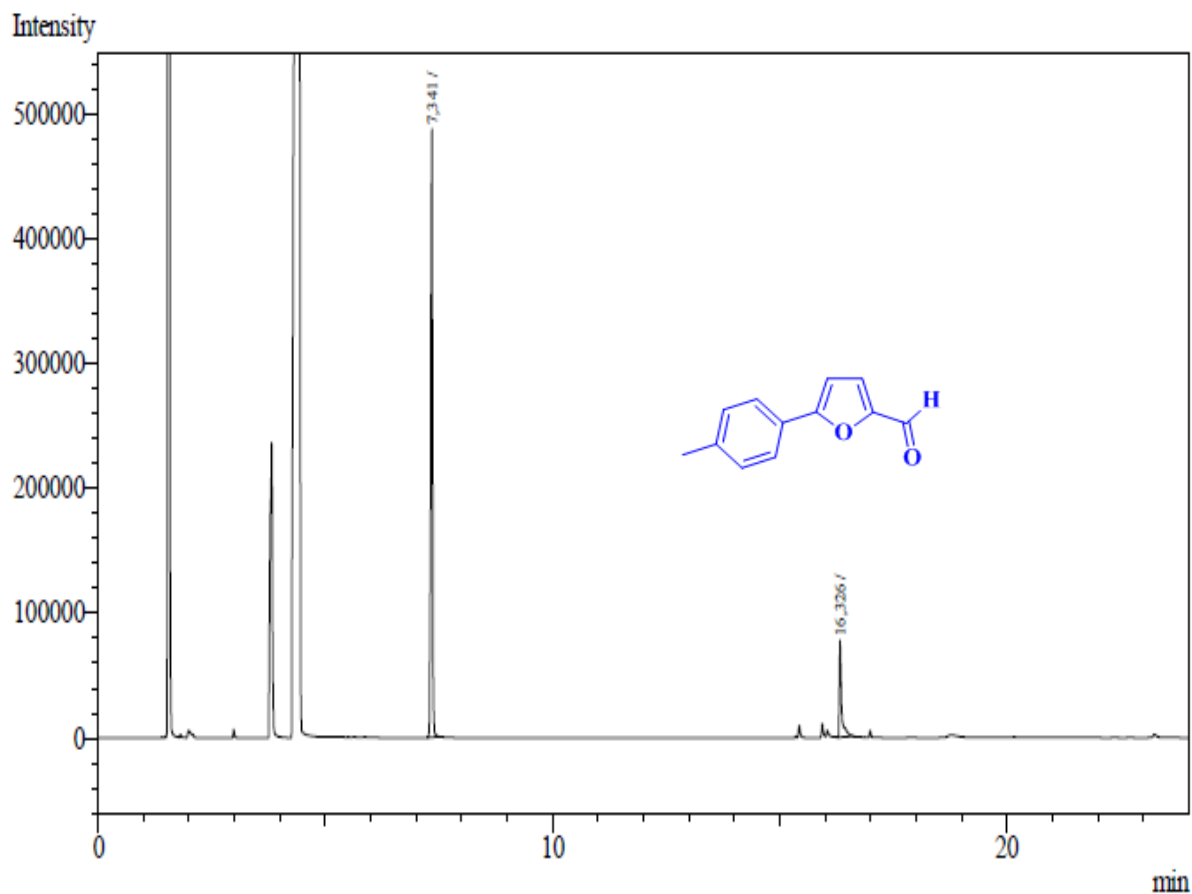

3c

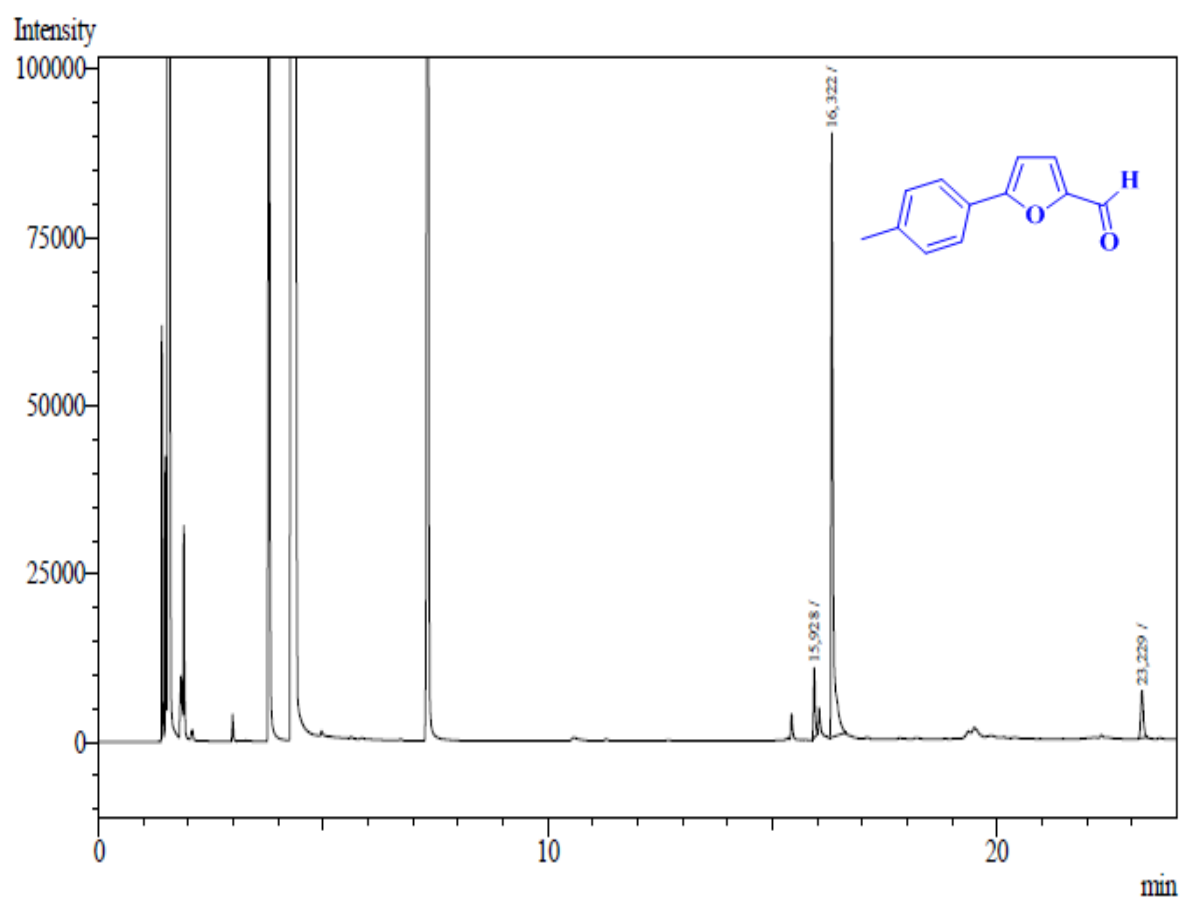

3d

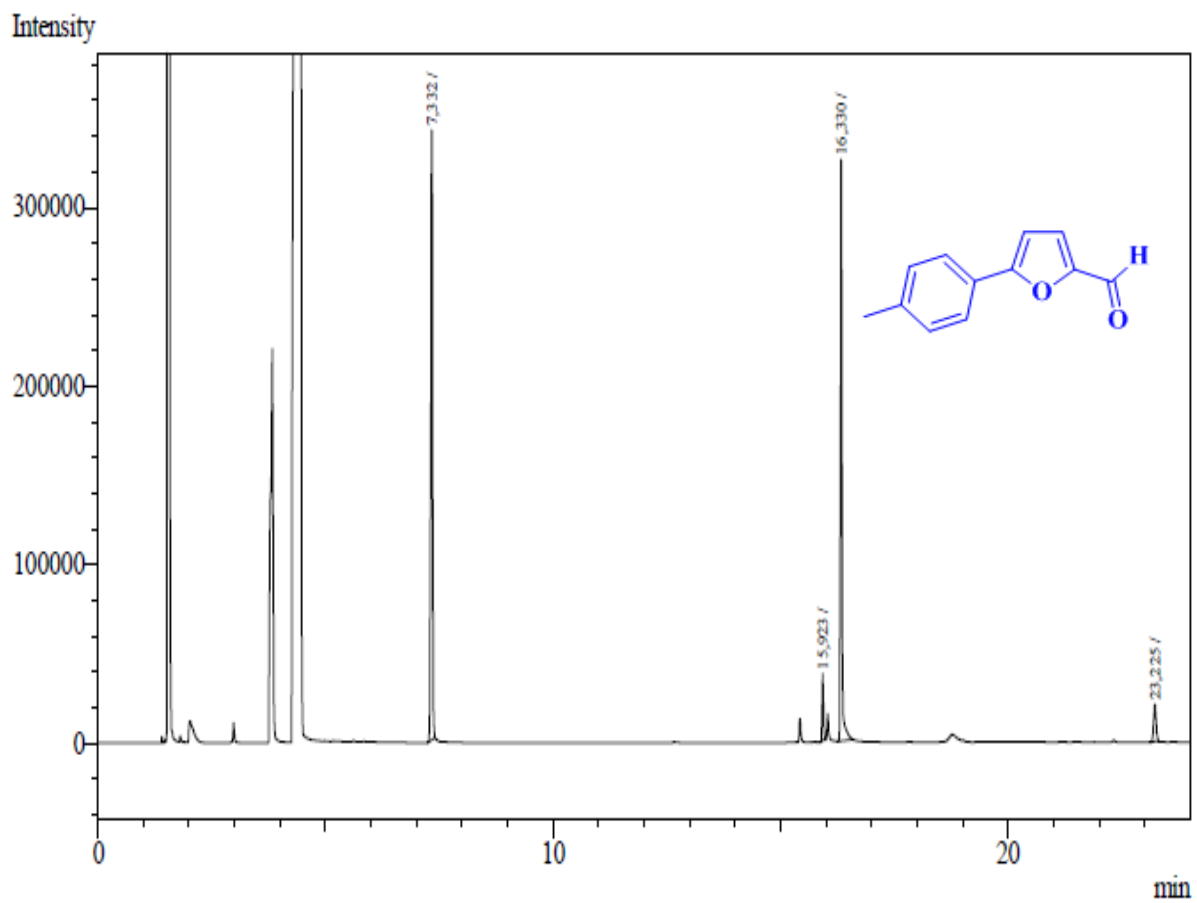

3e

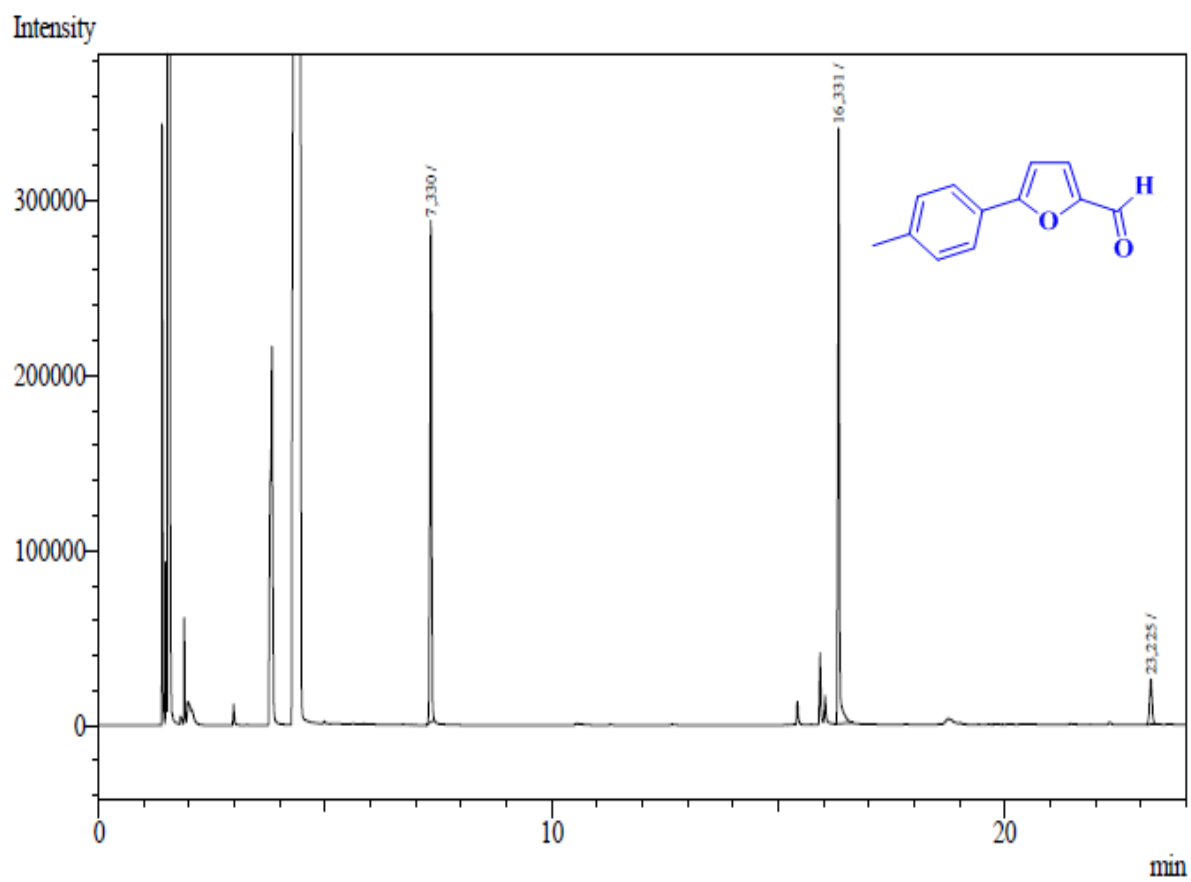

3f

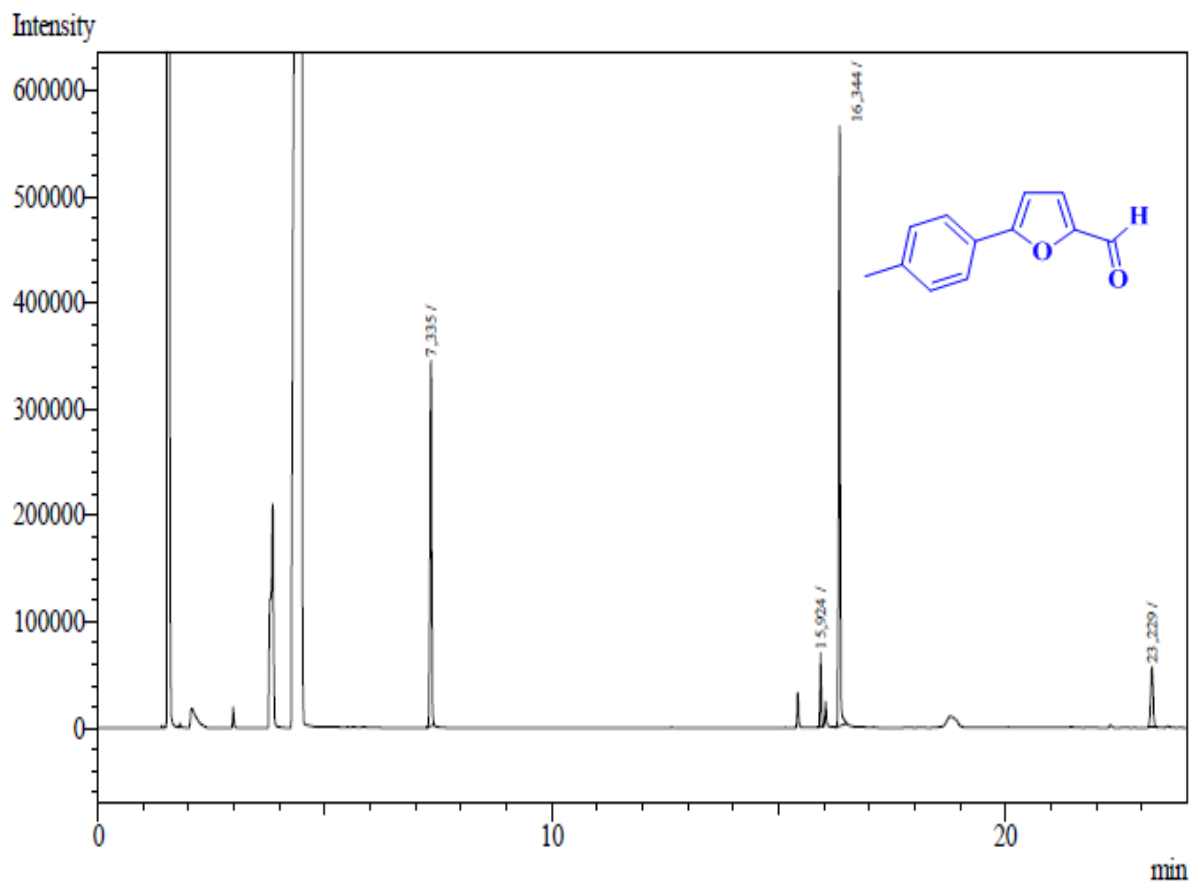

3g

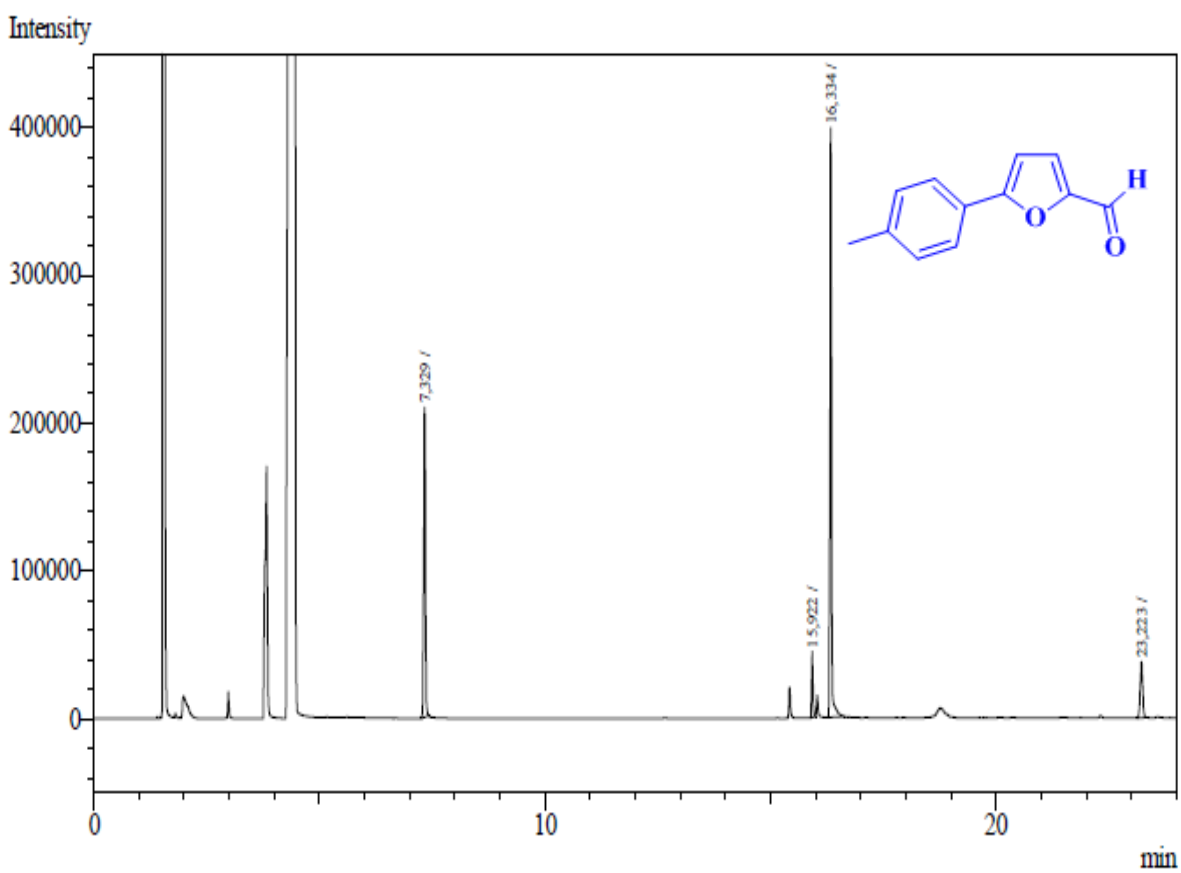

3h

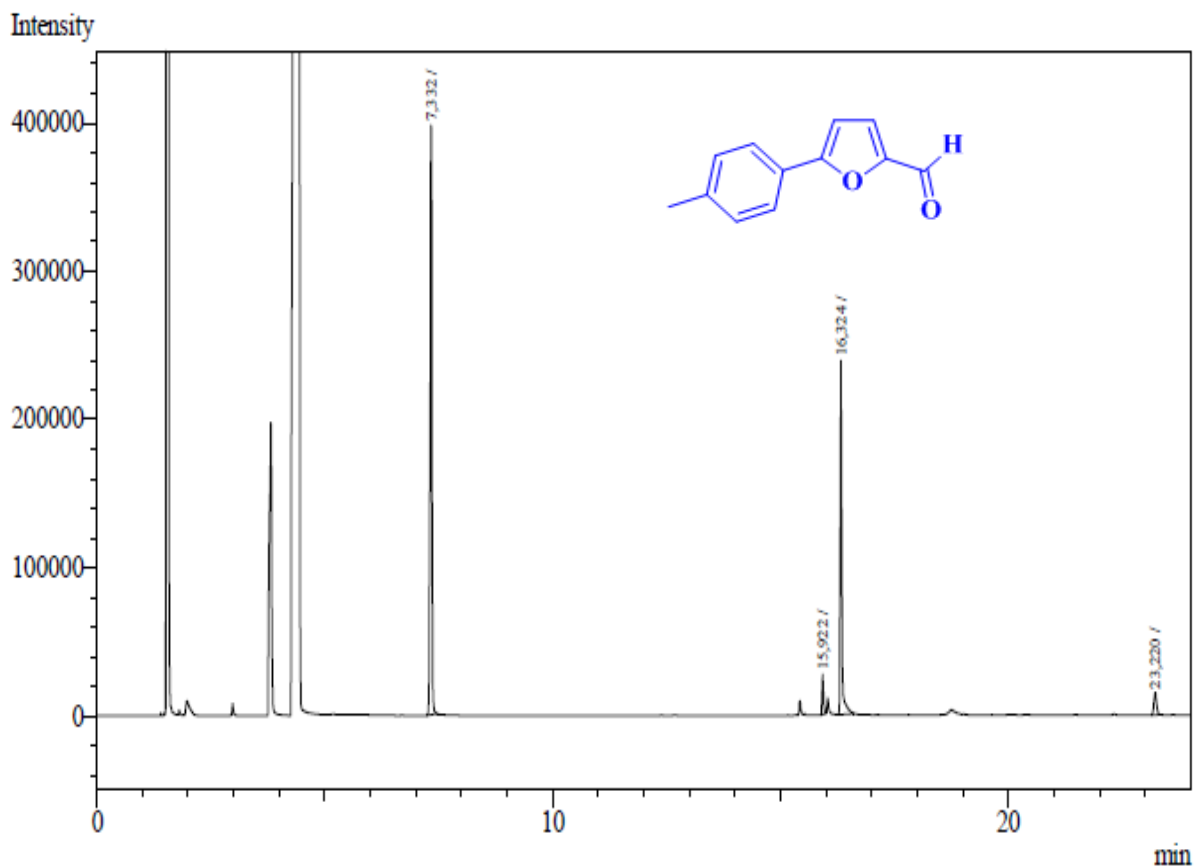

3i

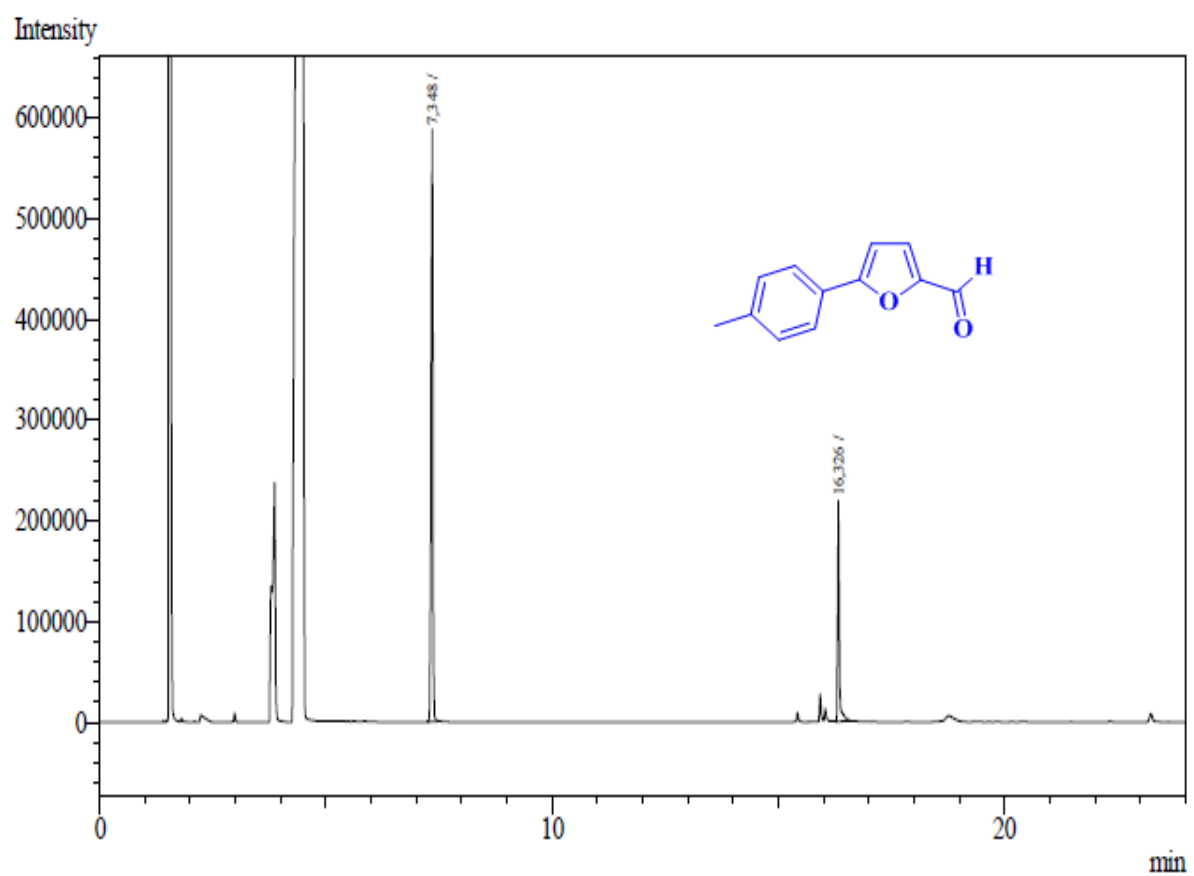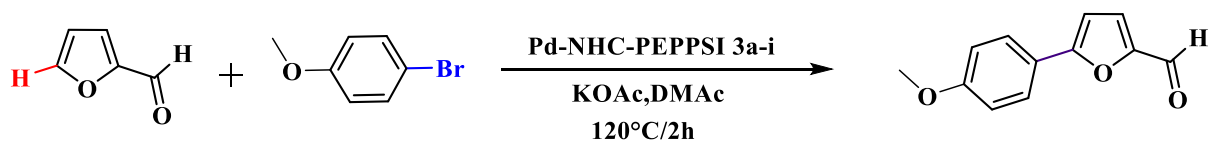

3a

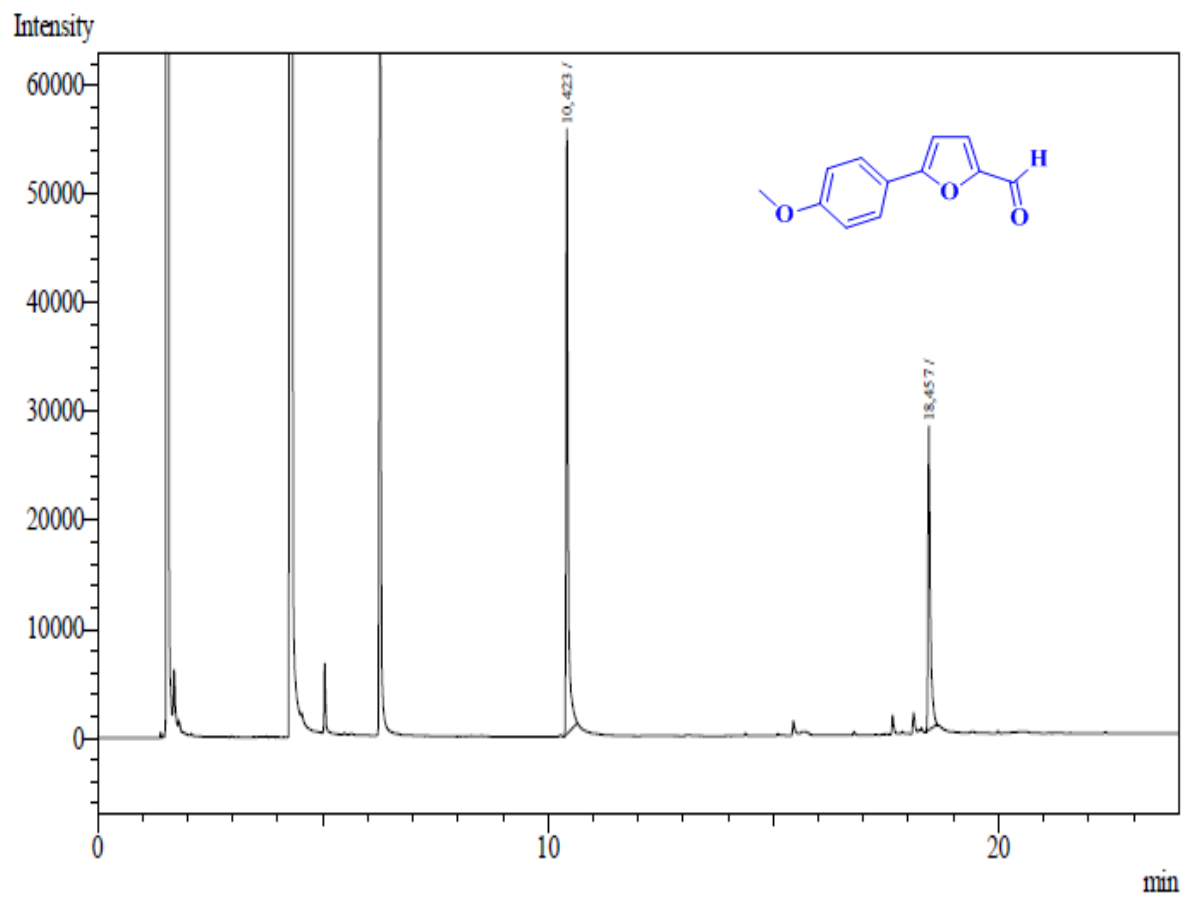

3b

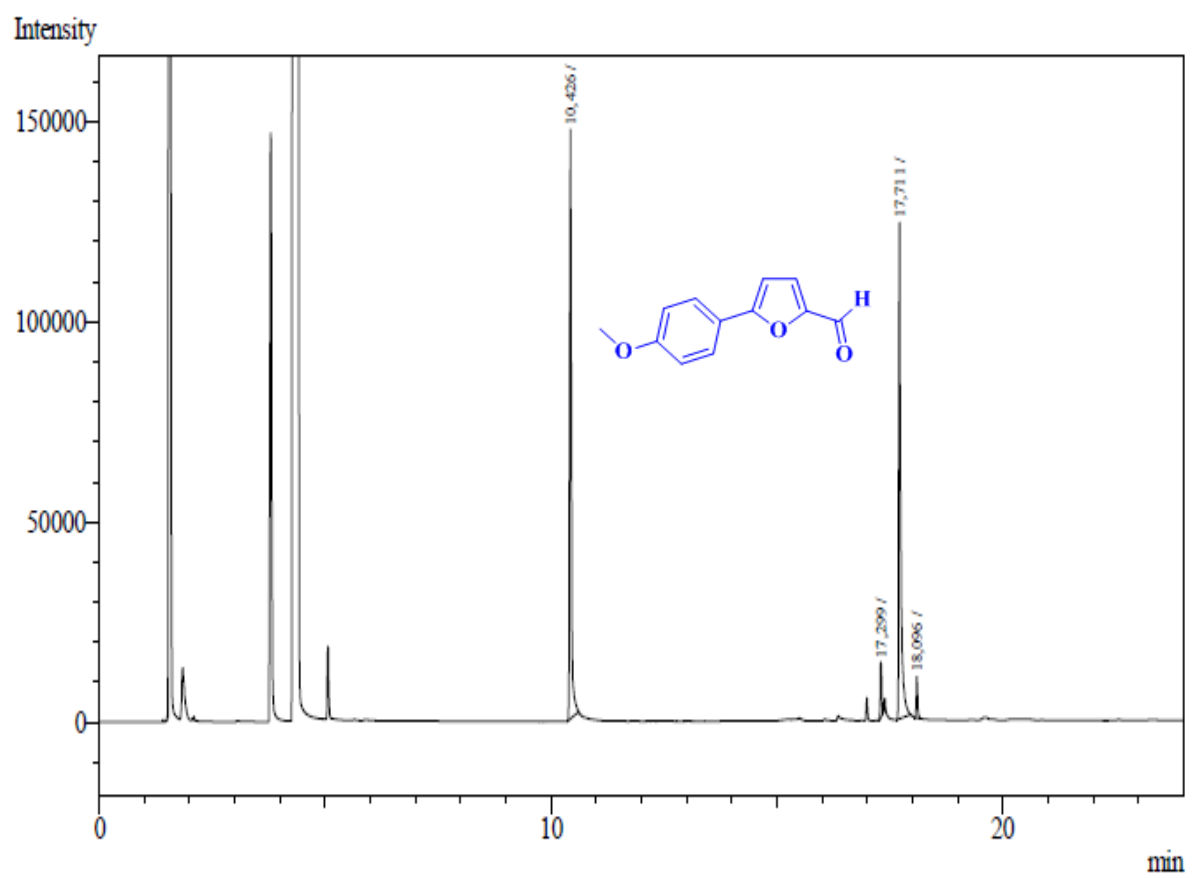

3c



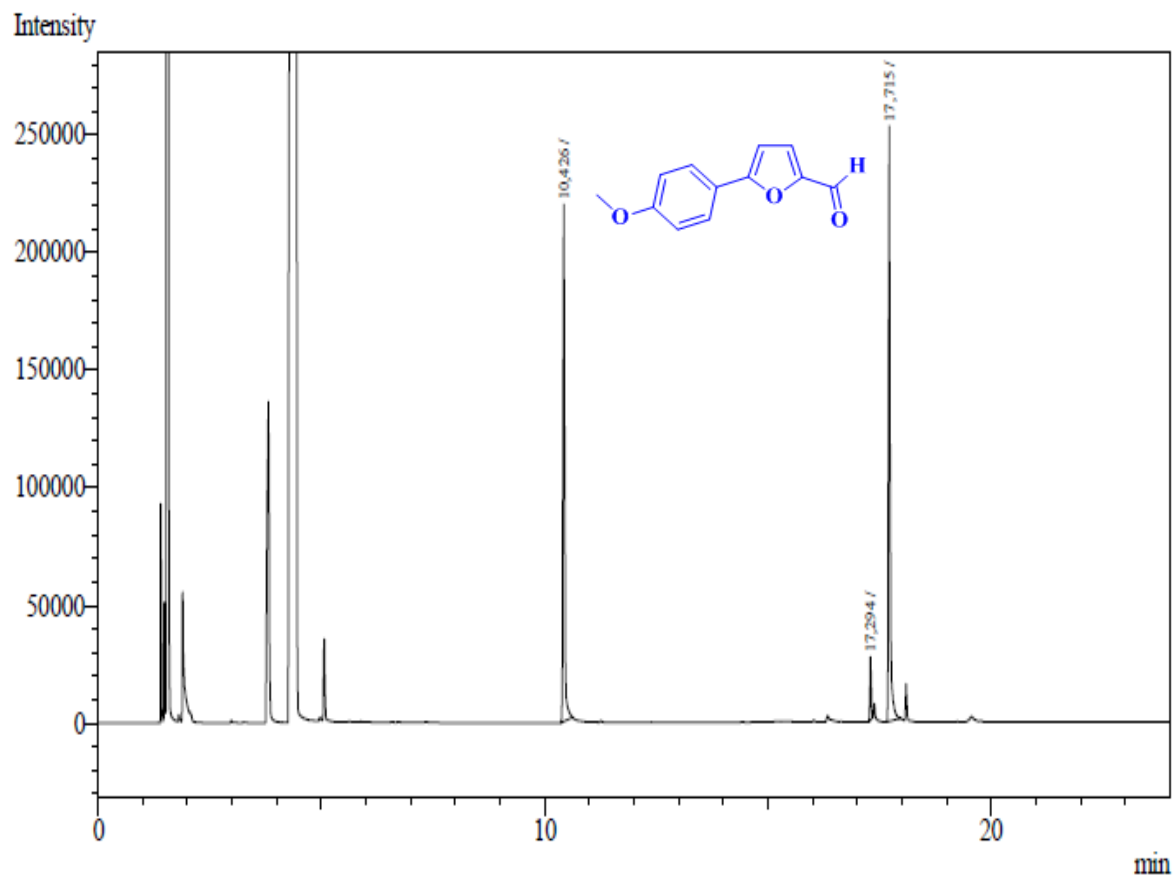

3d

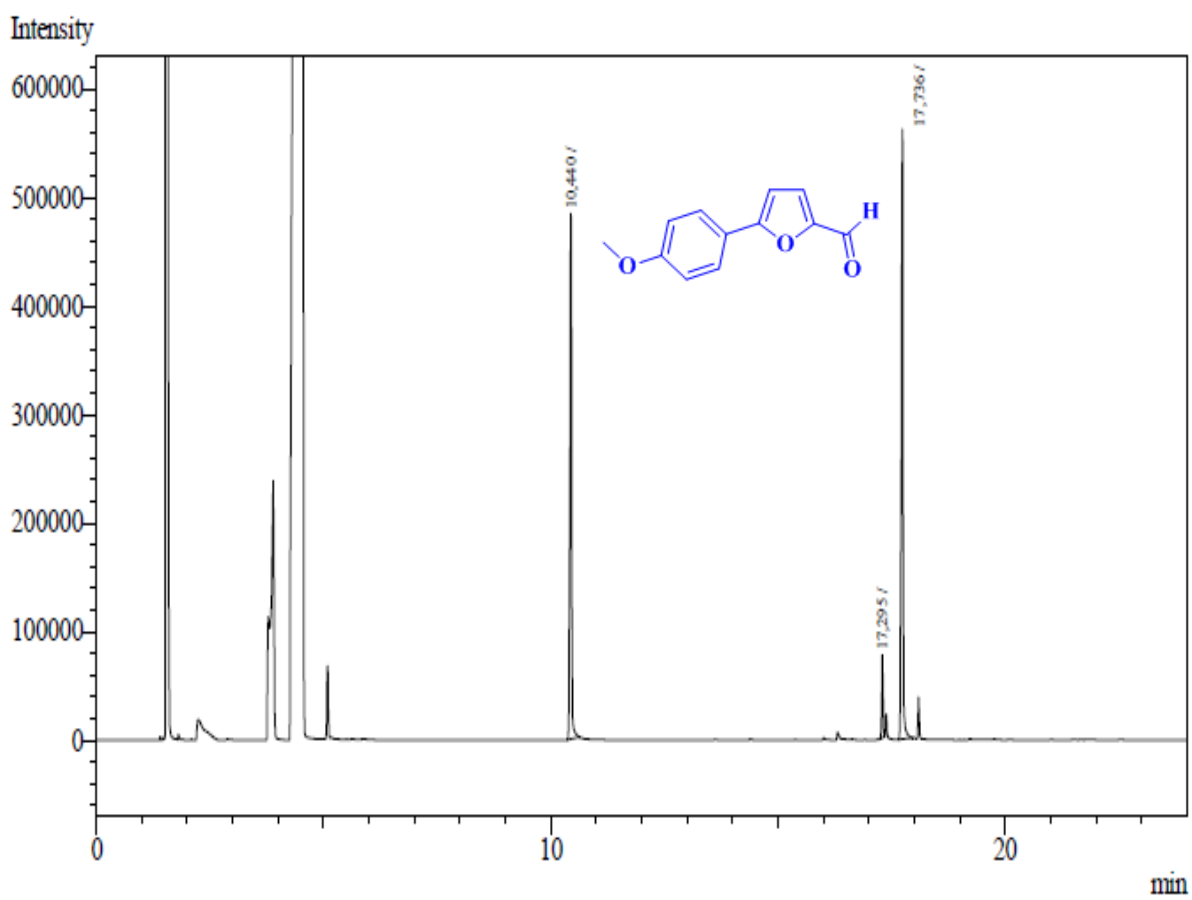

3e

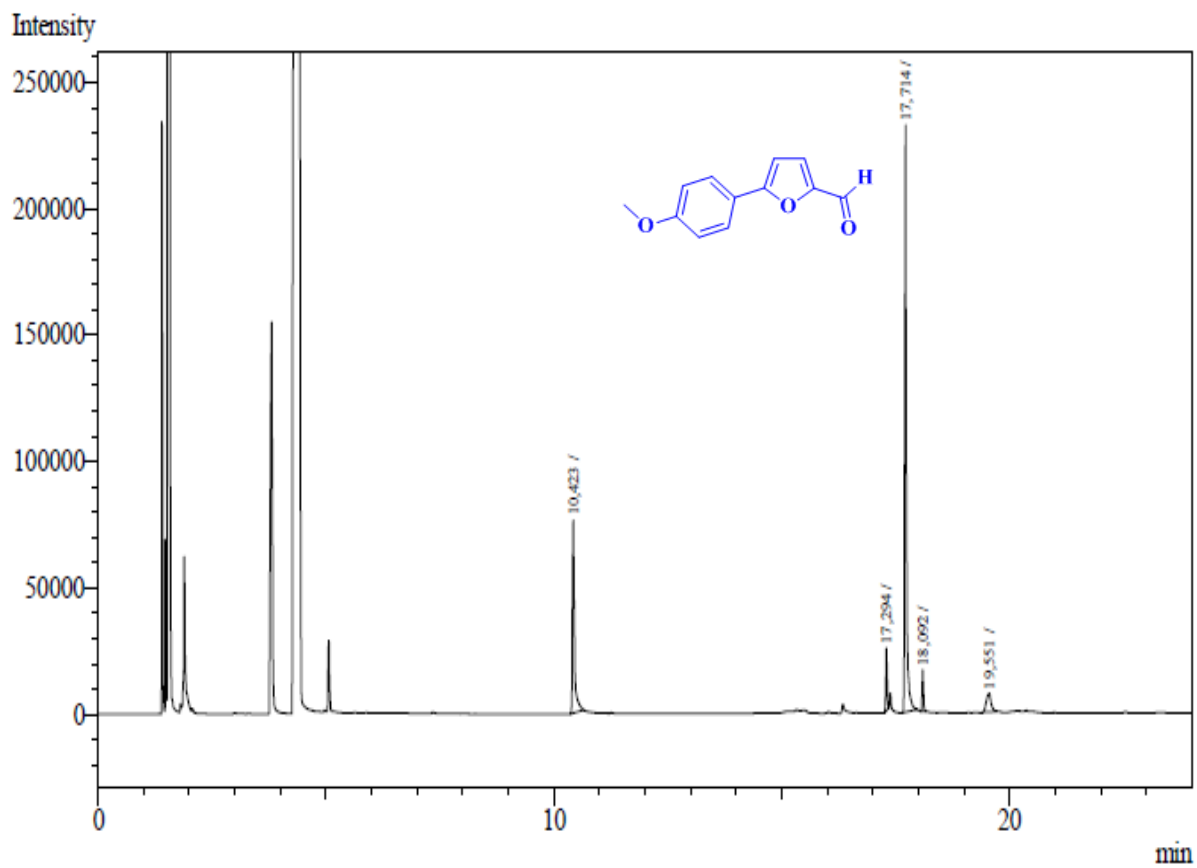

3f

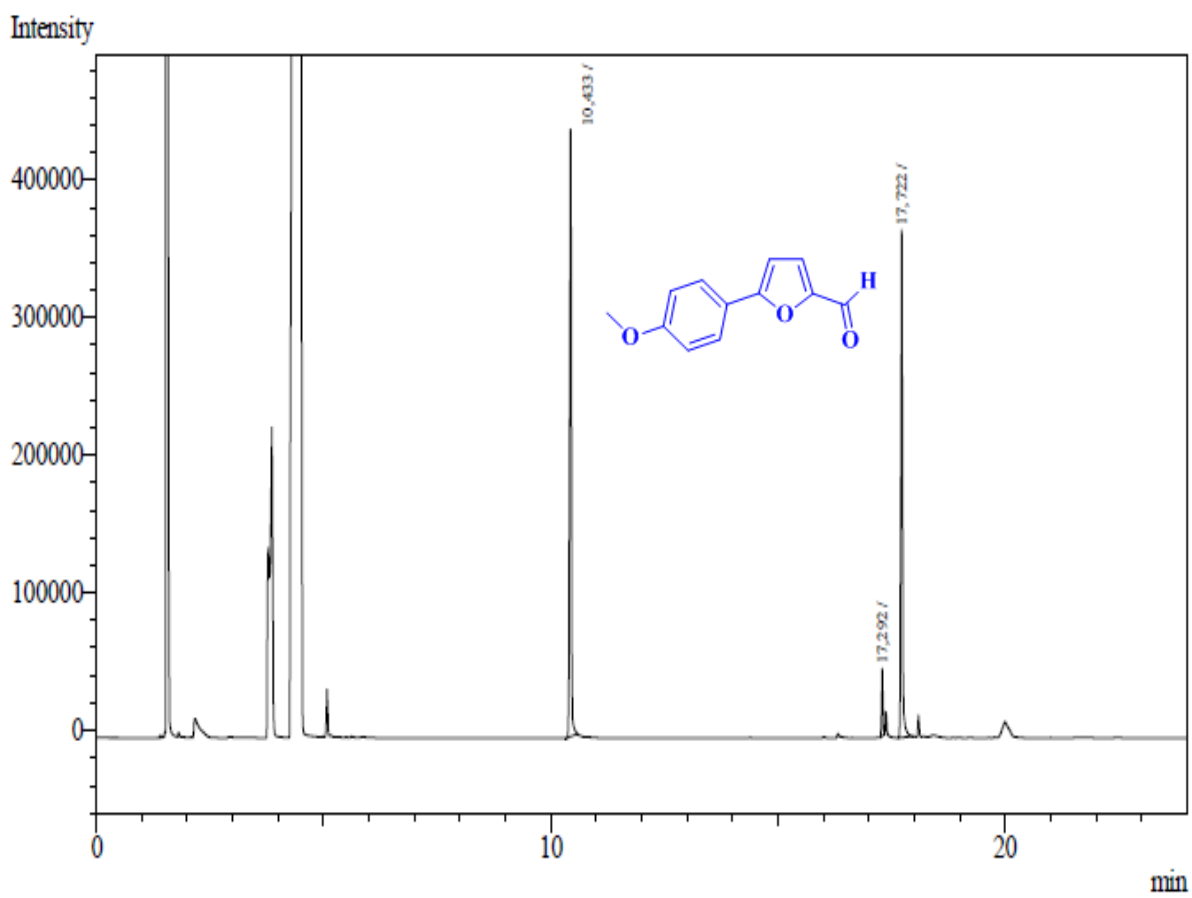

3g

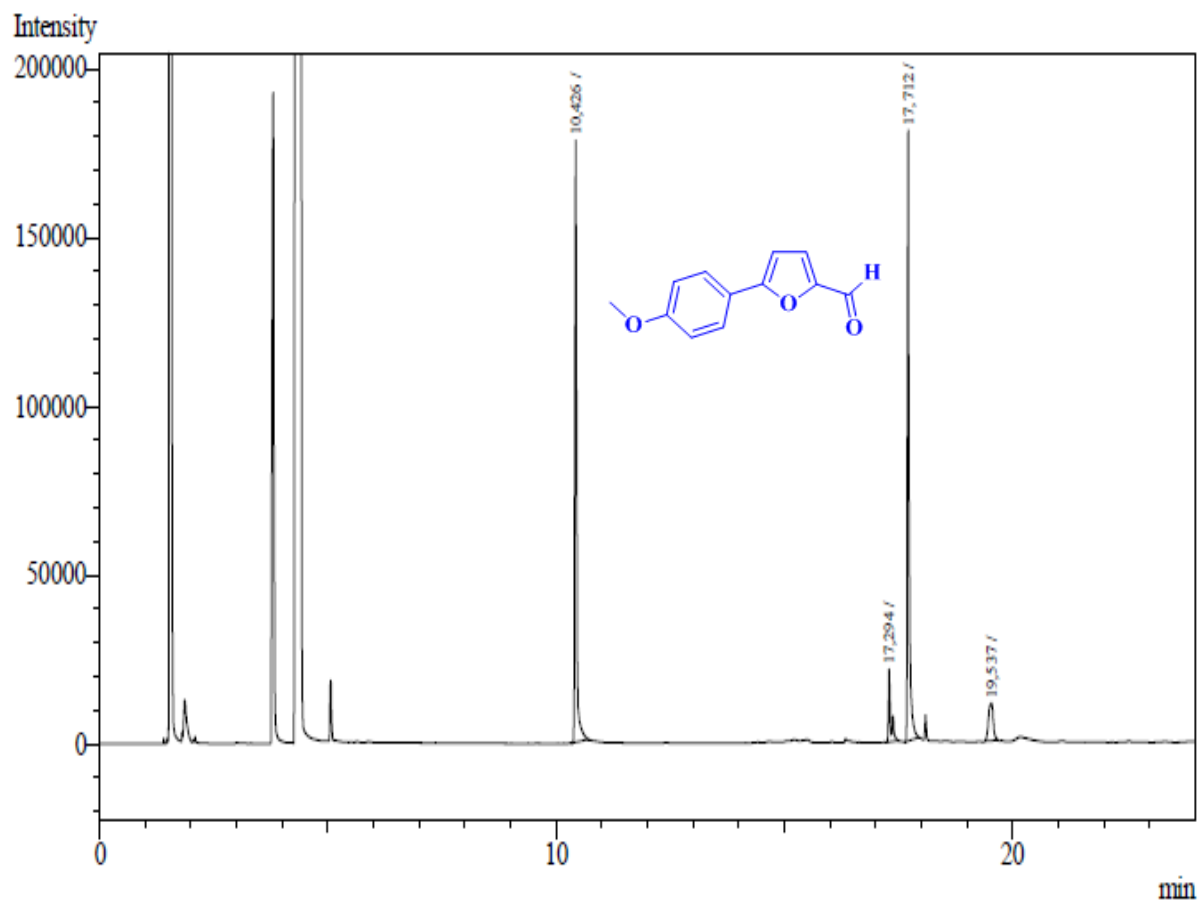

3h

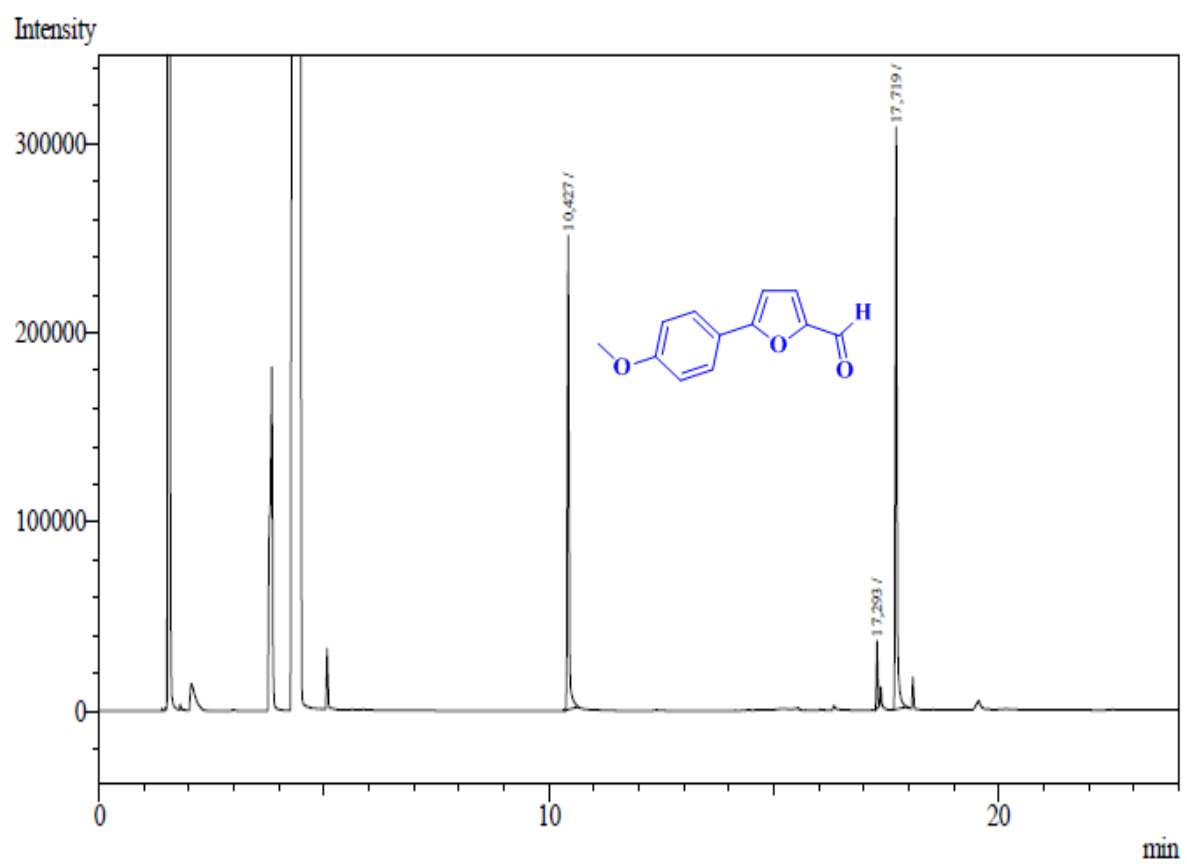

3i

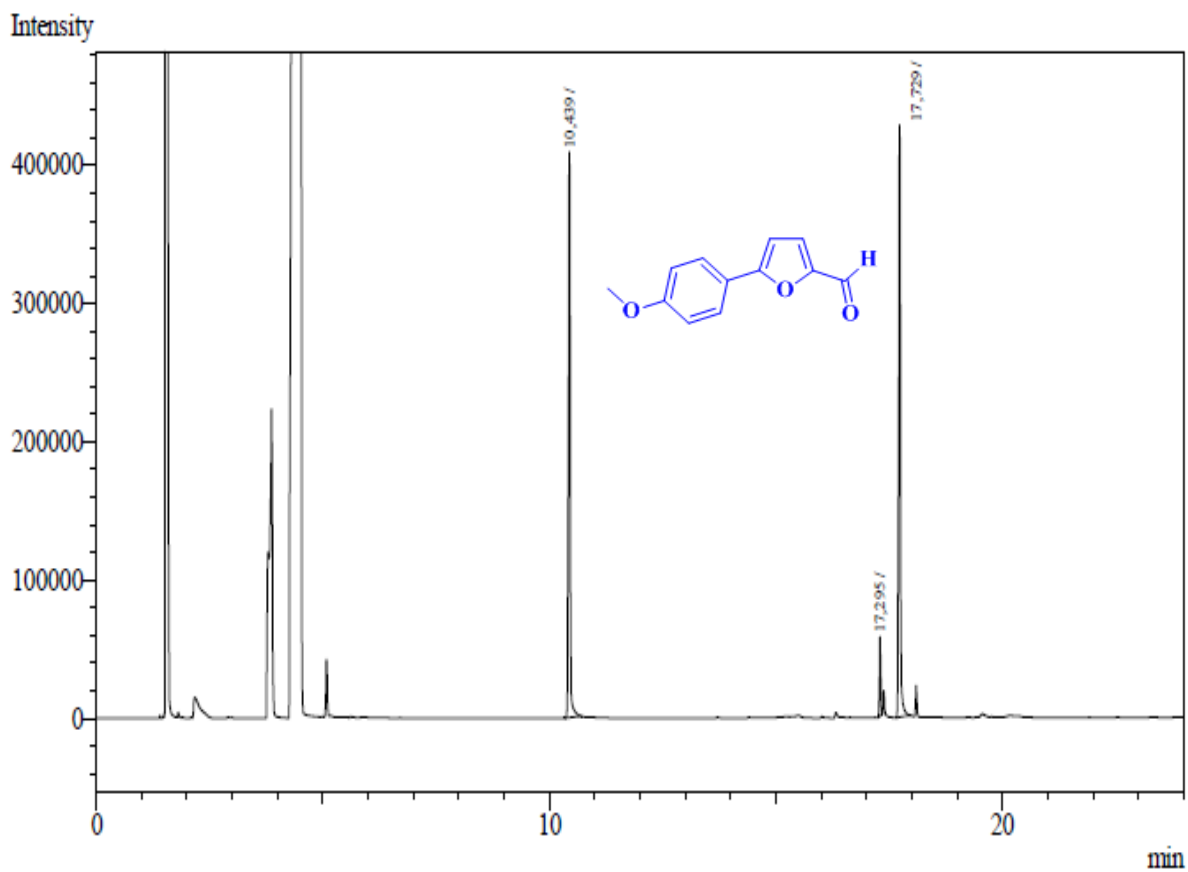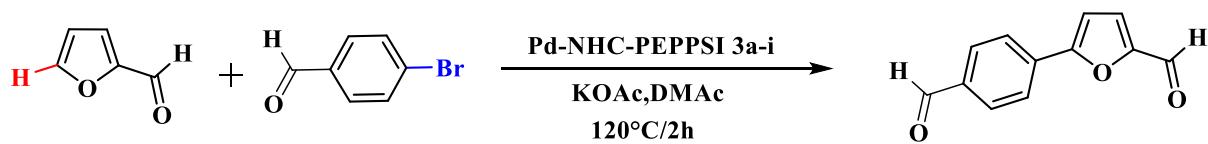

3a

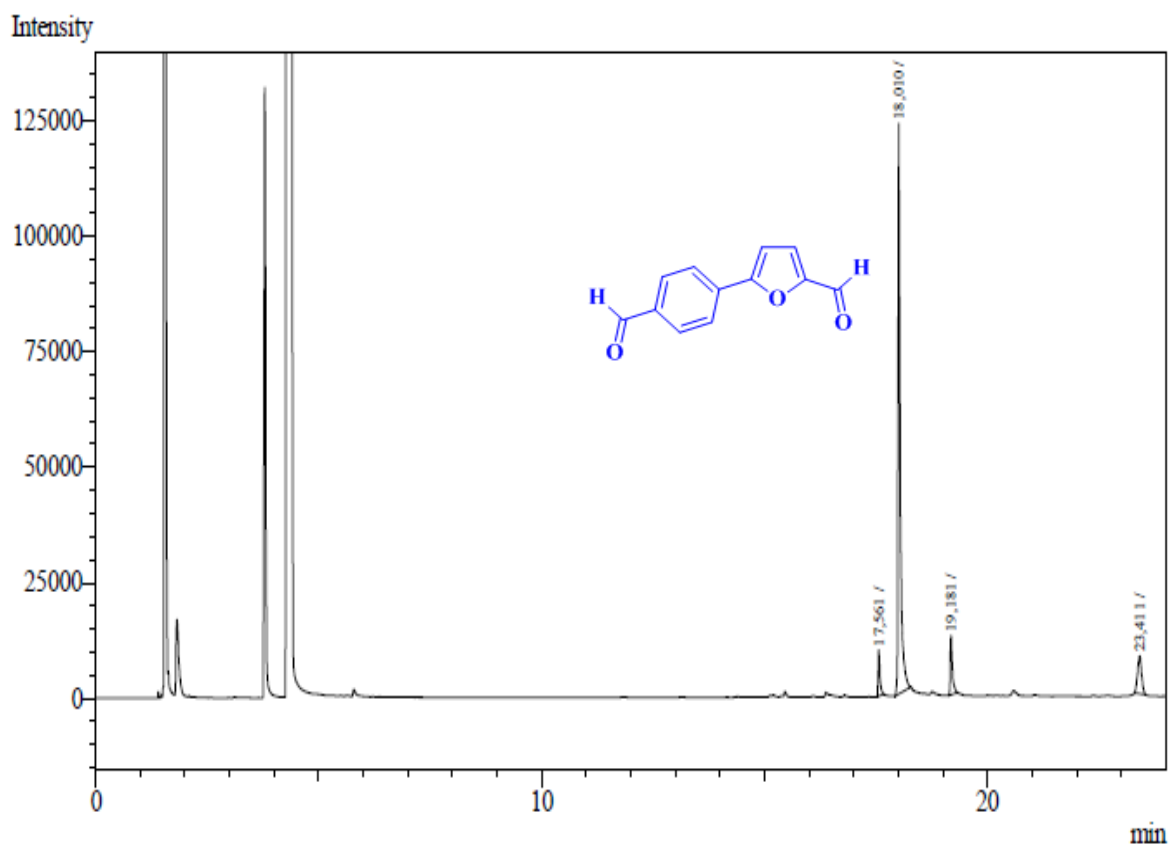

3b

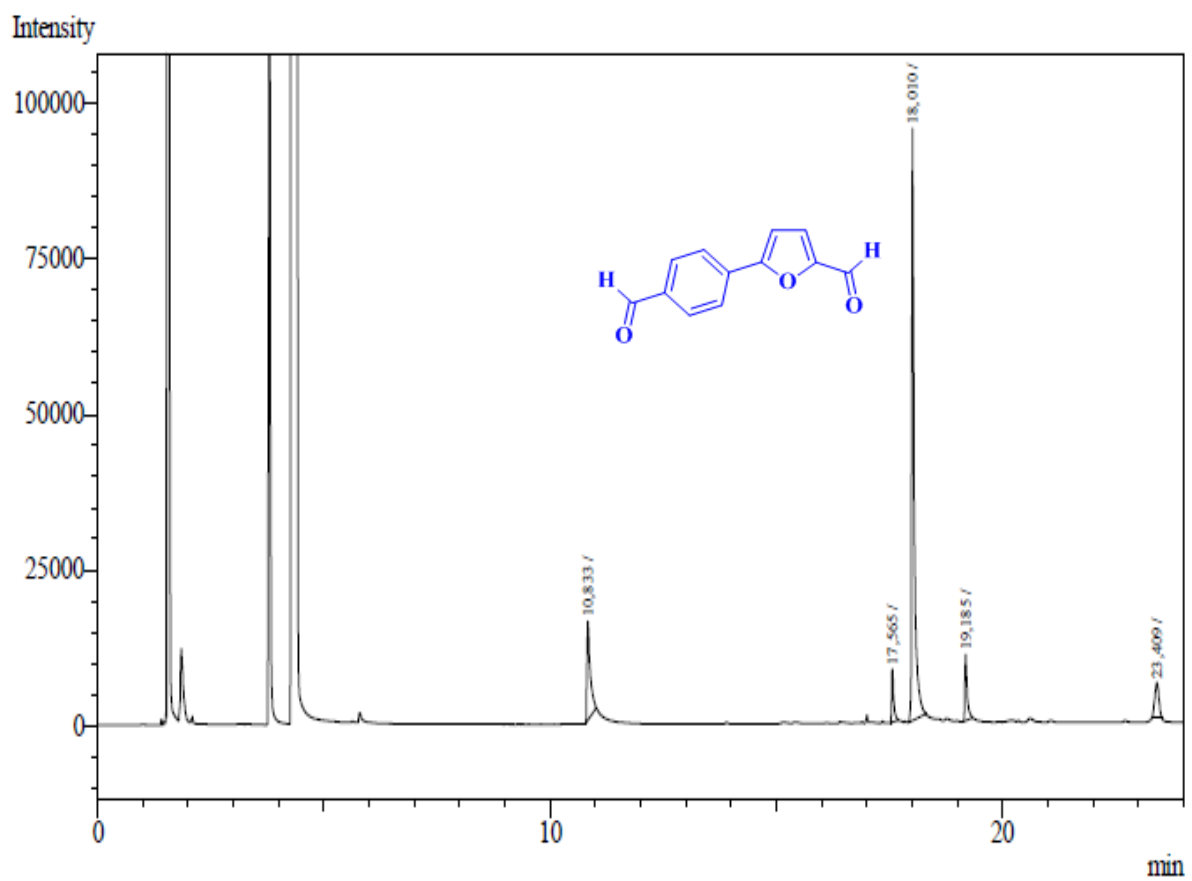

3c

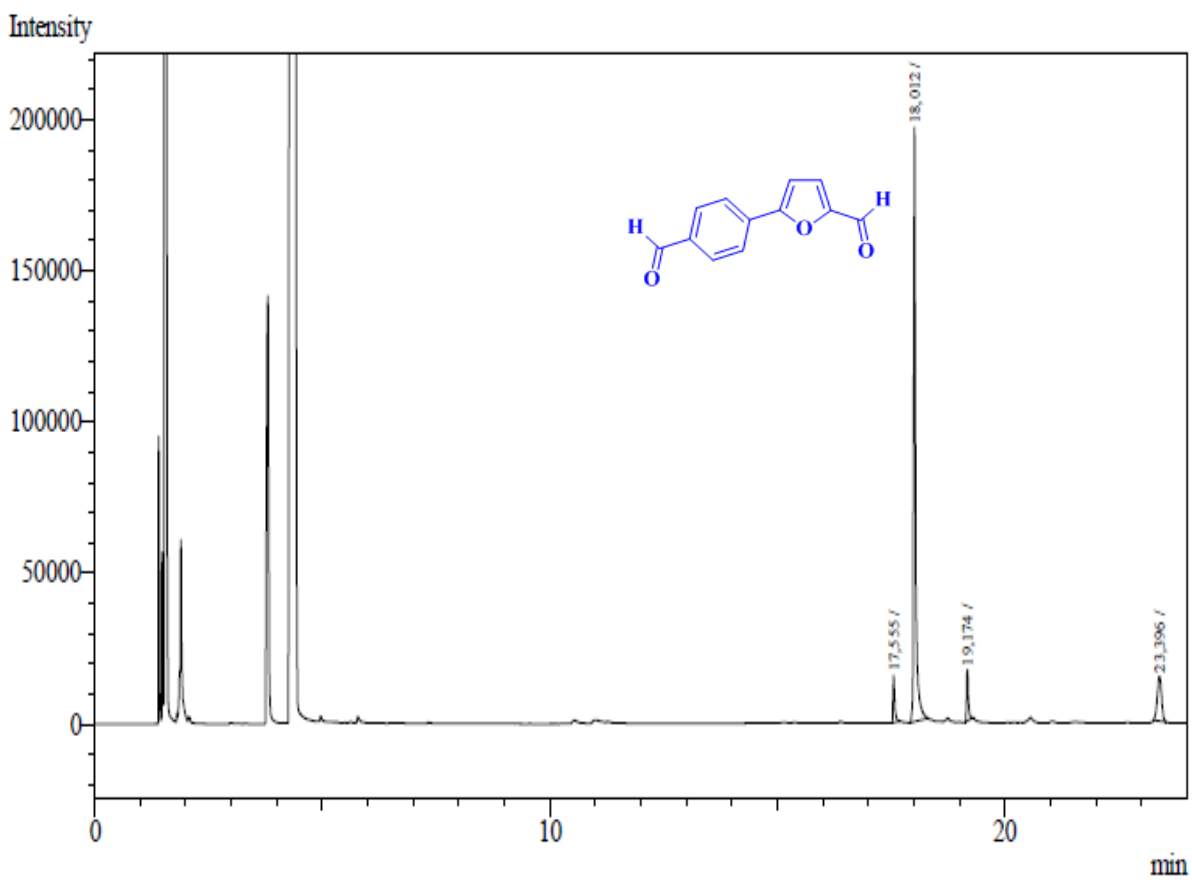

3d

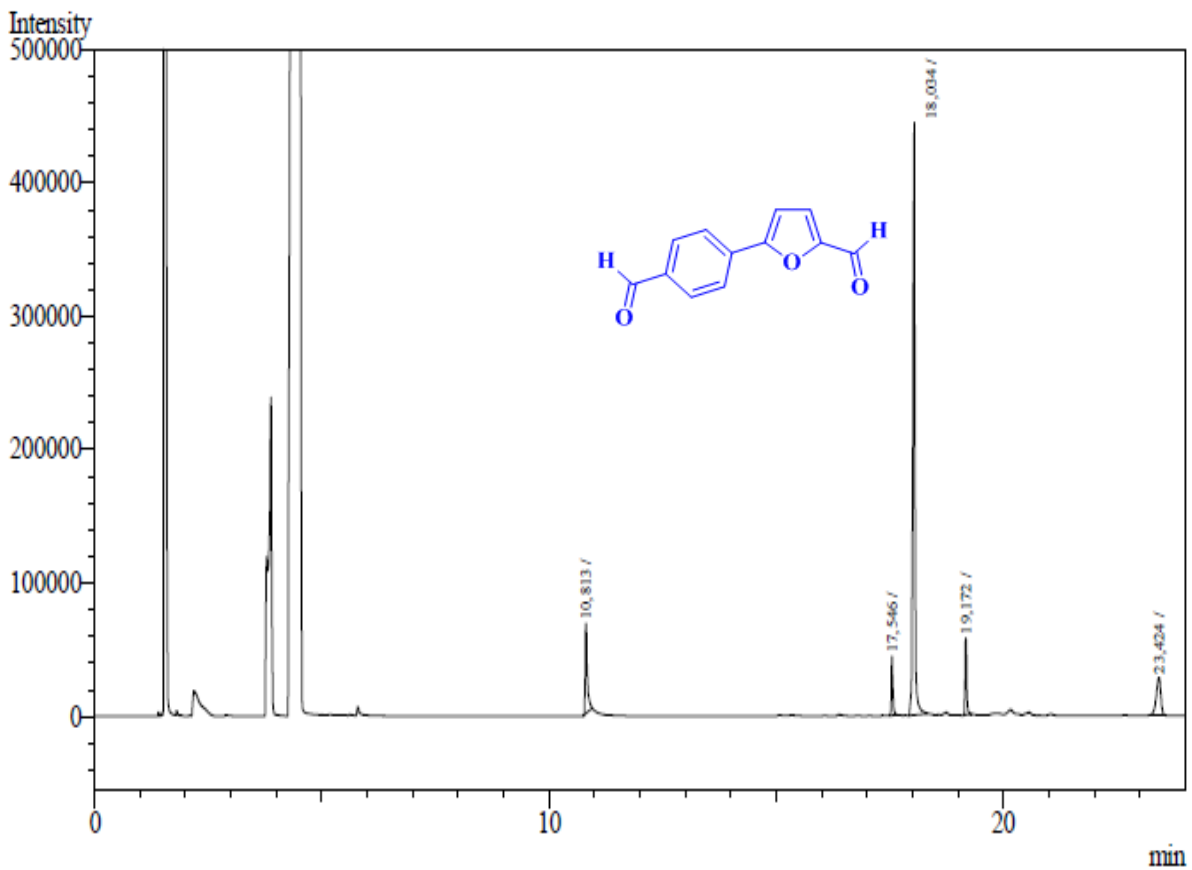

3e

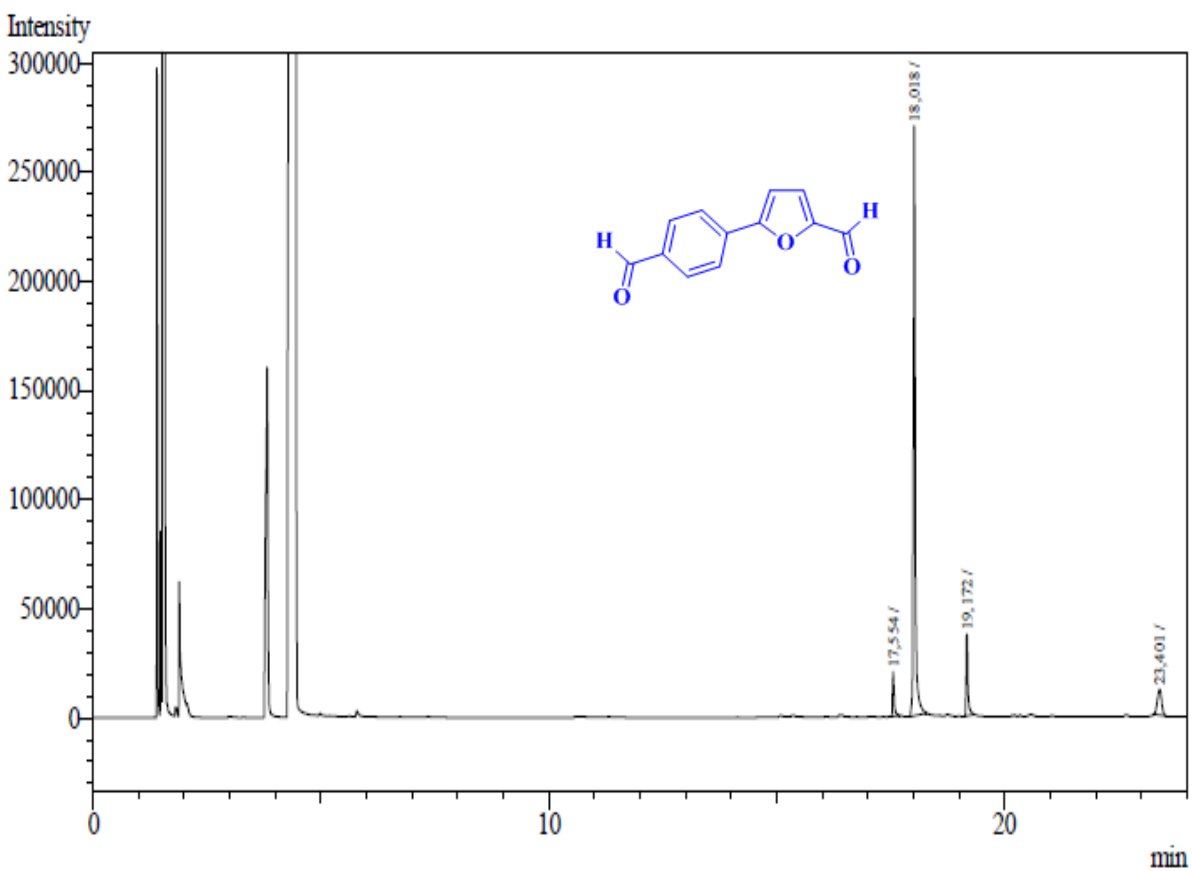

3f

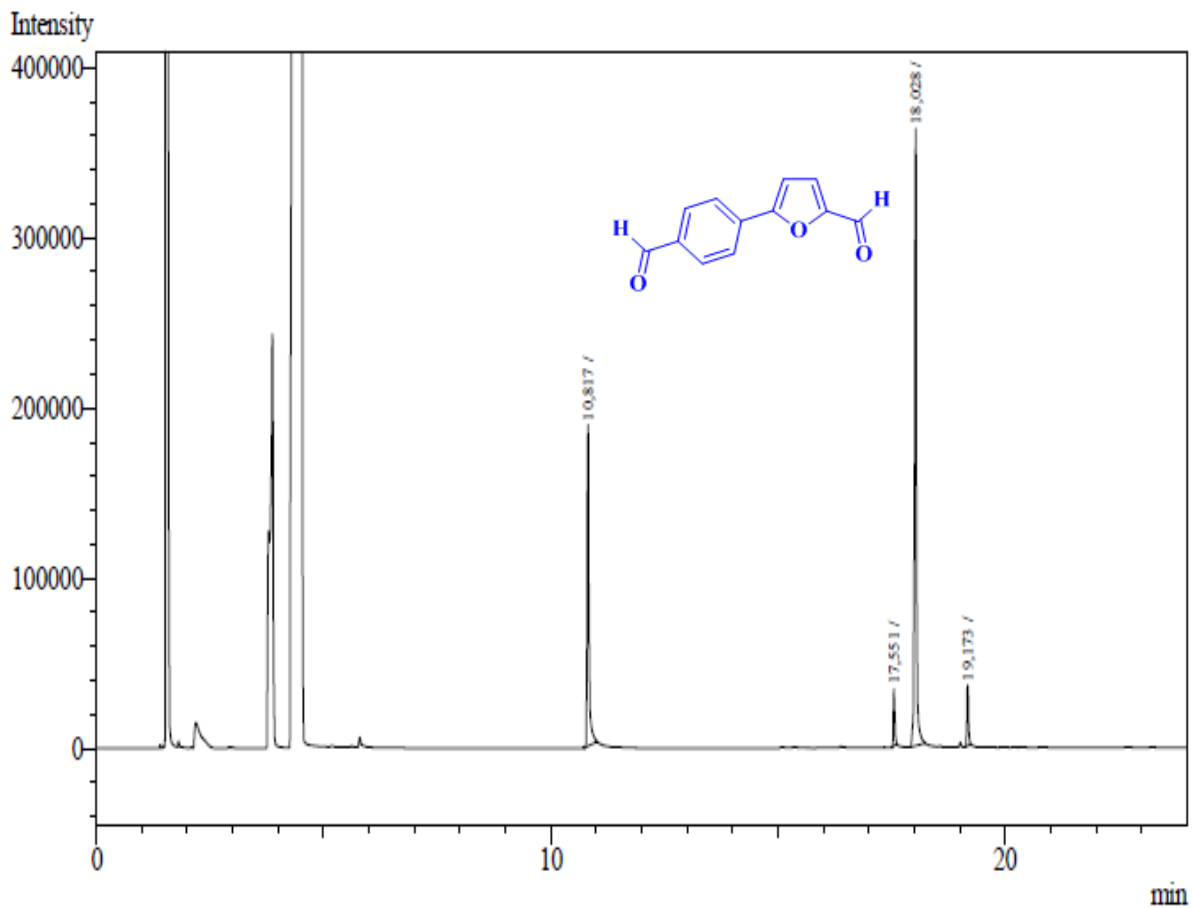

3g

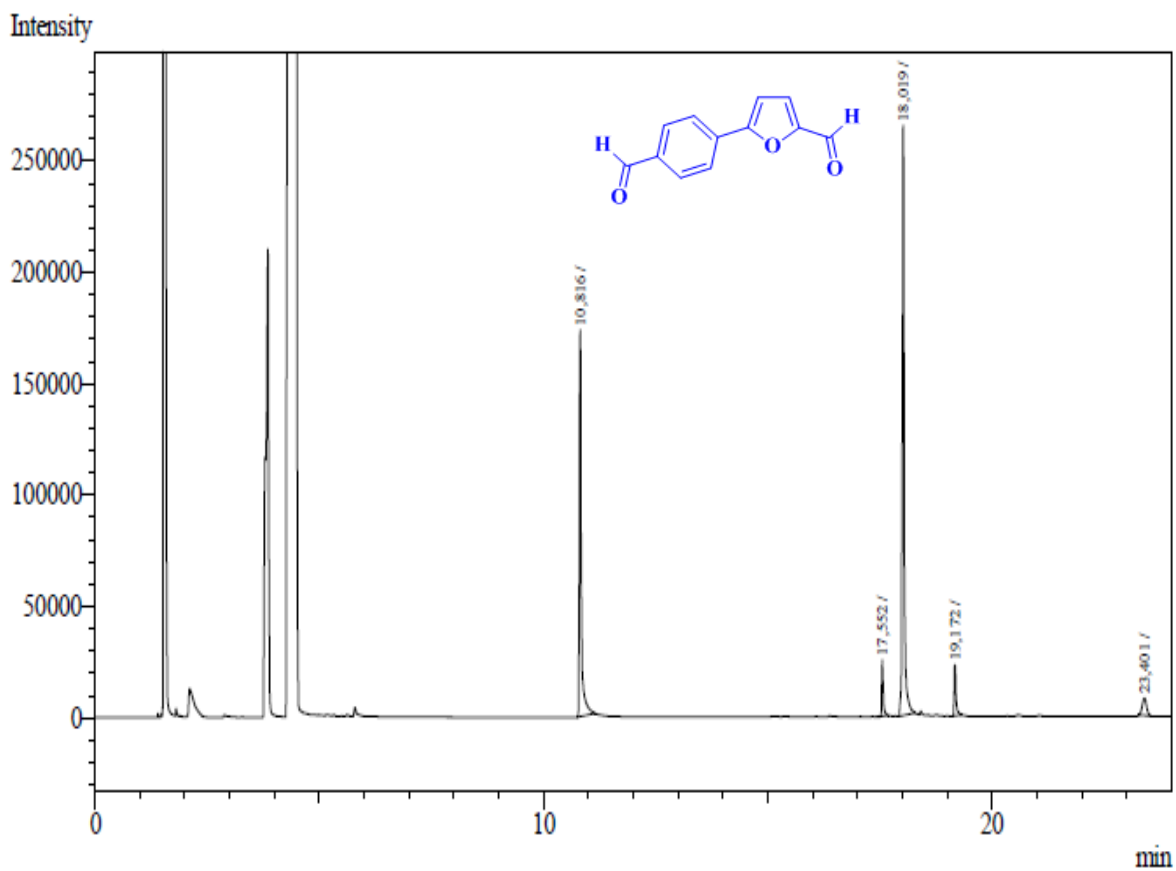

3h

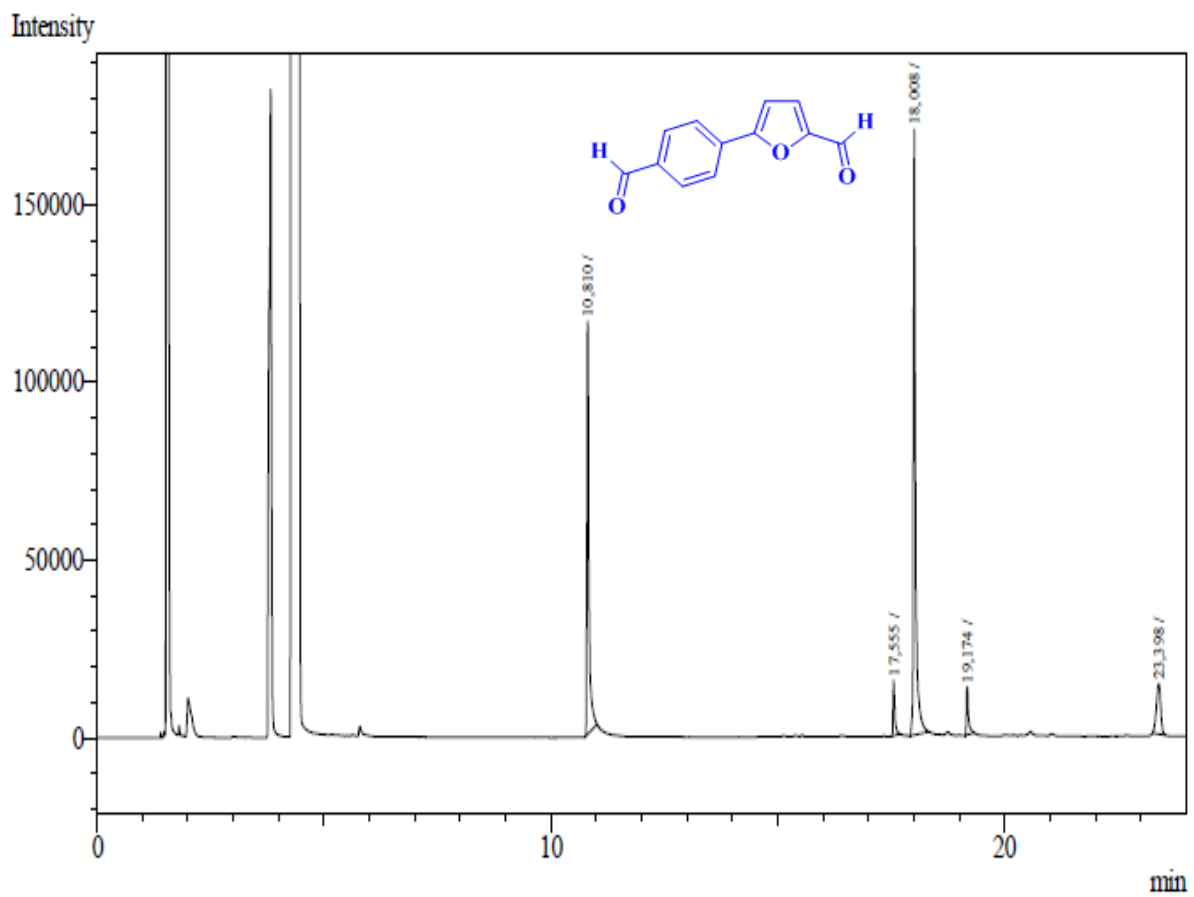

3i

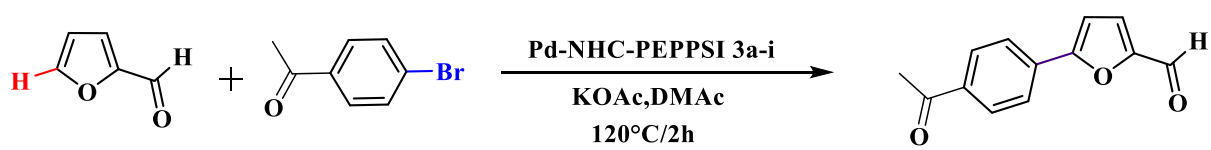

3a



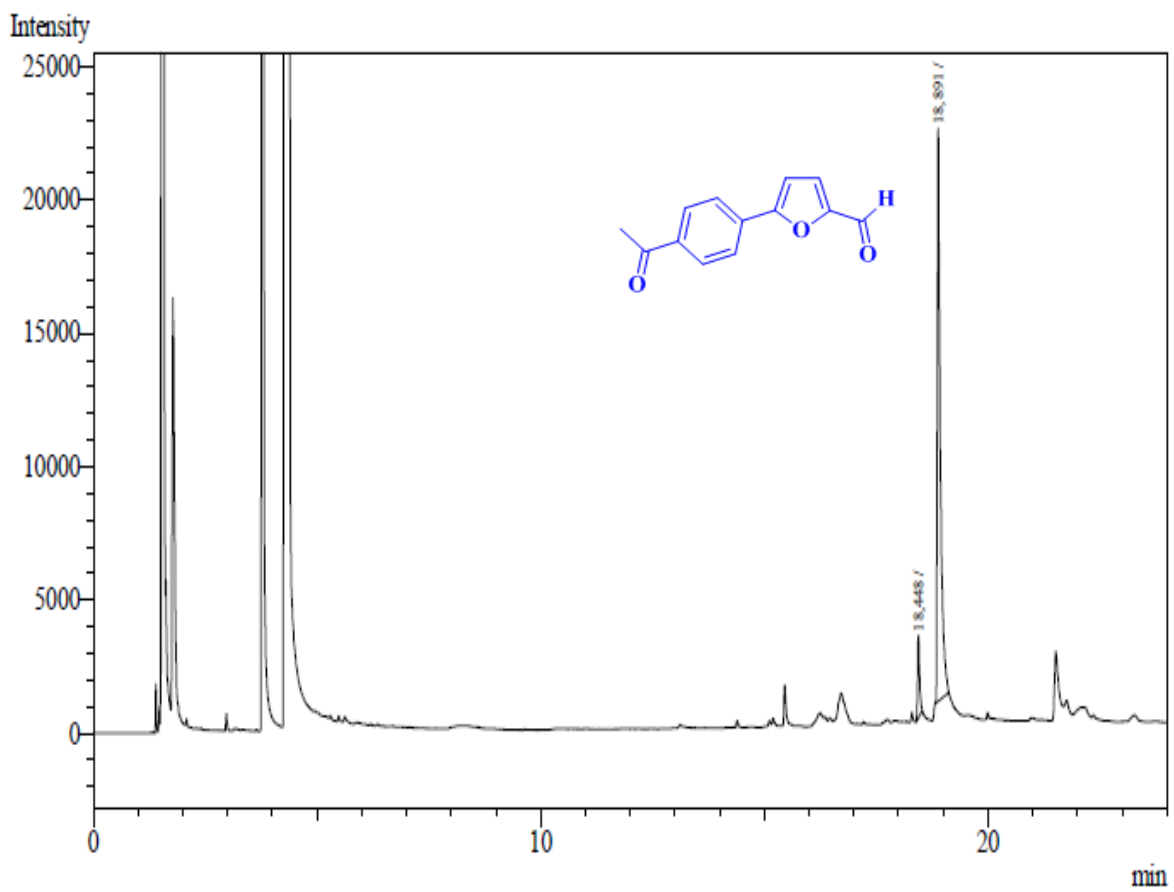

3b

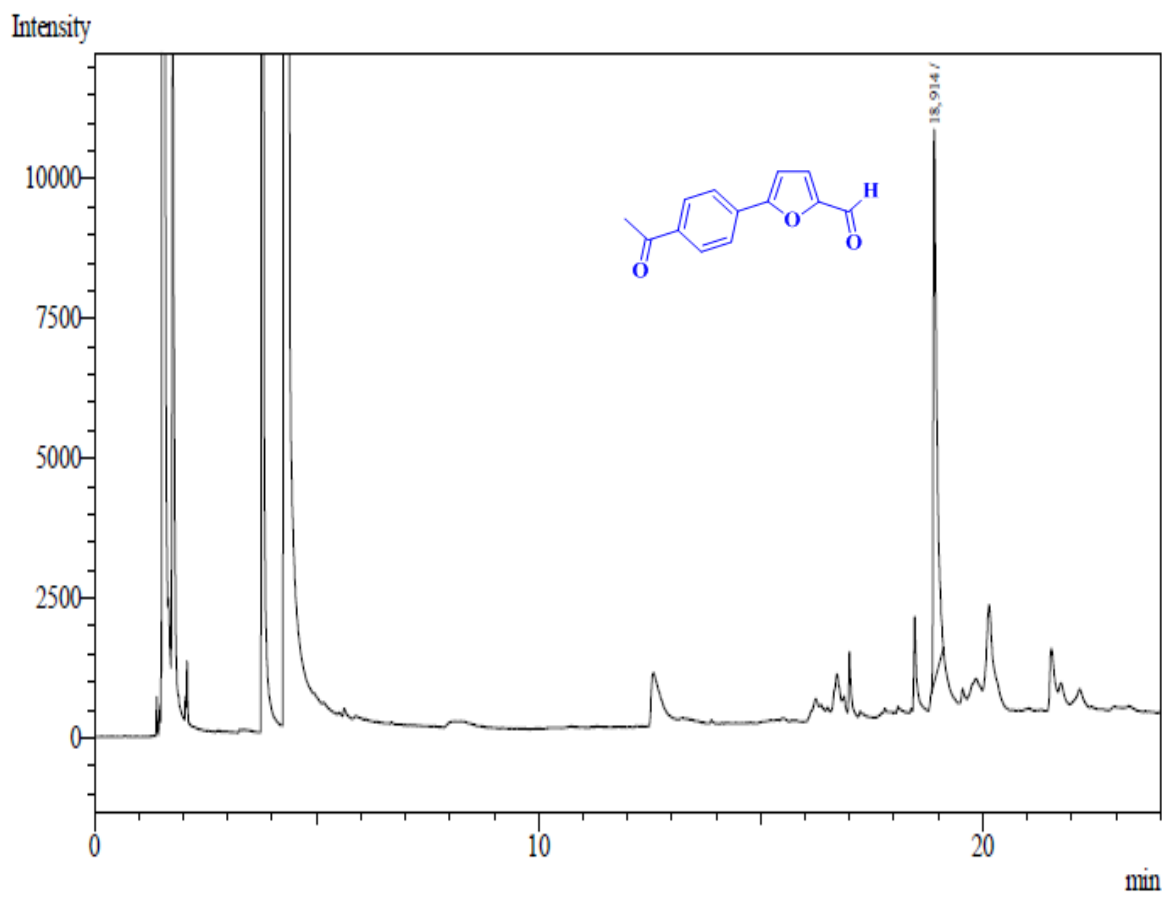

3c

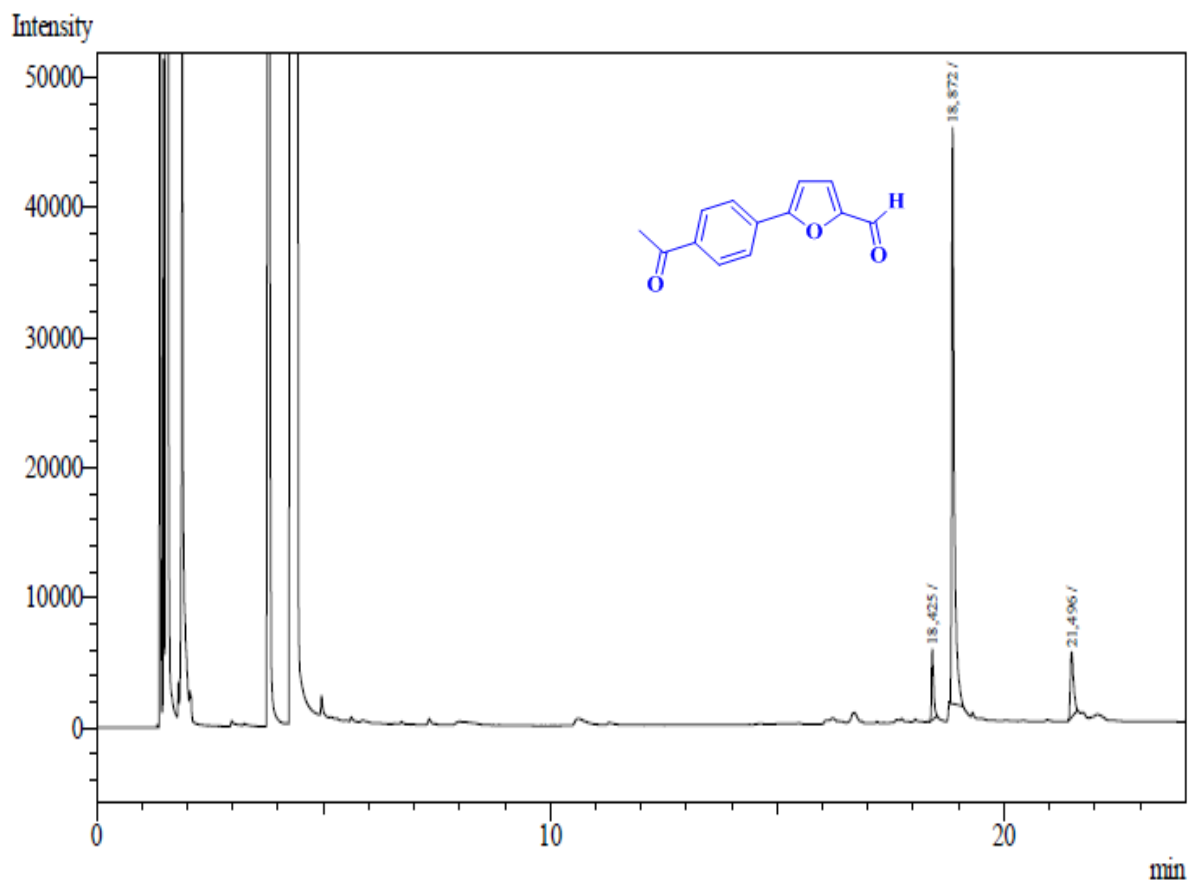

3d

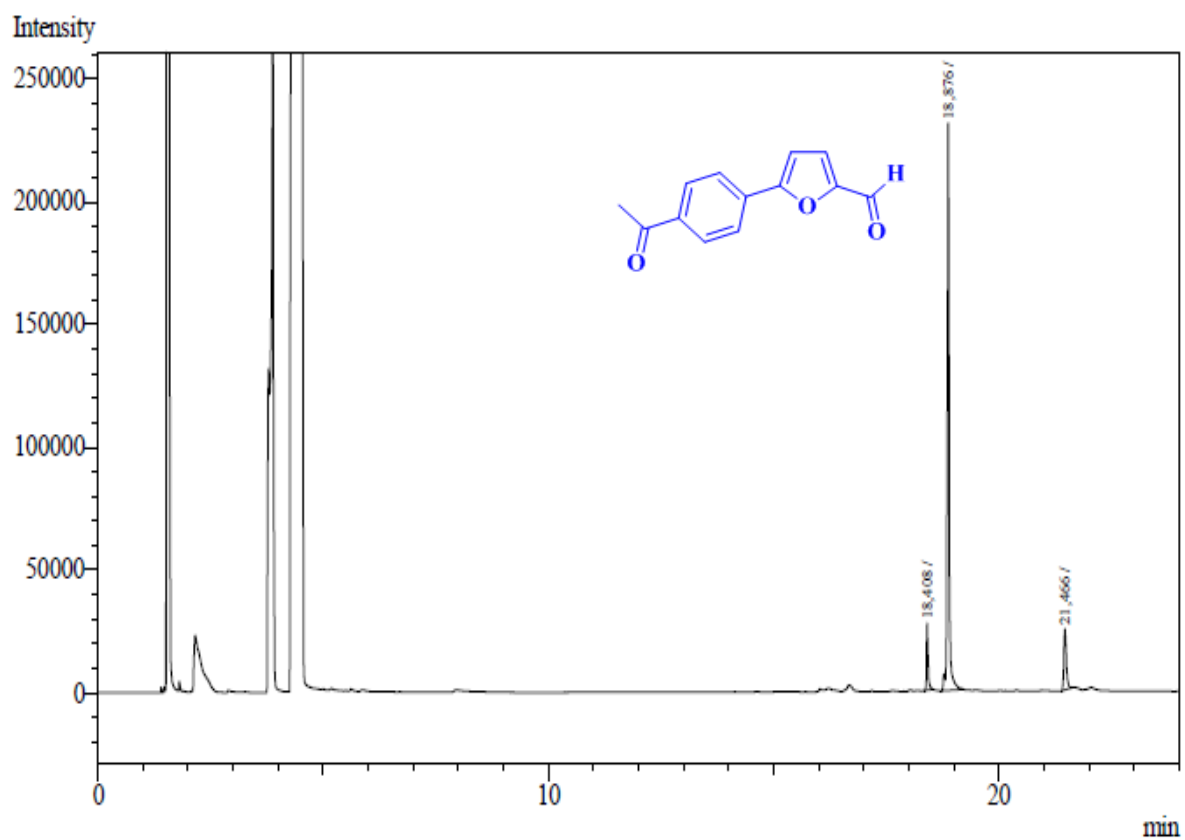

3e

Intensity

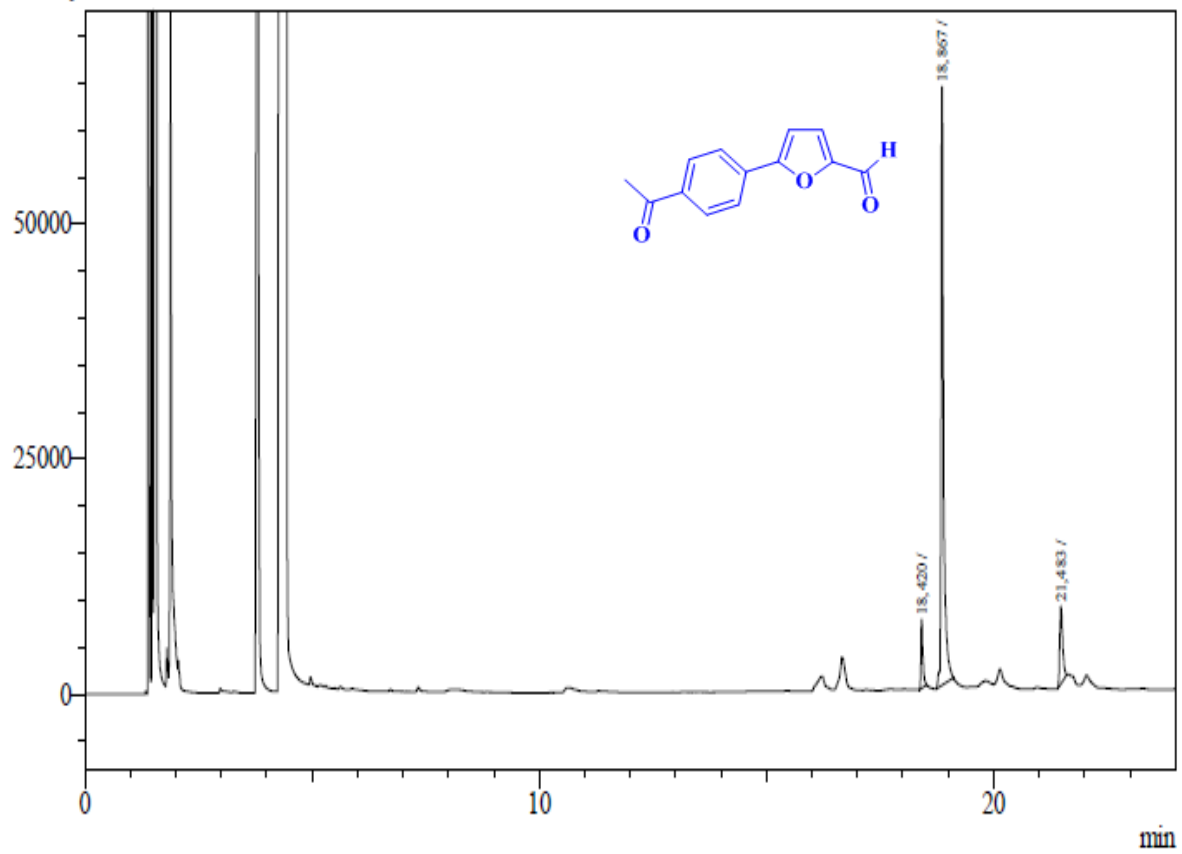

3f

Intensity

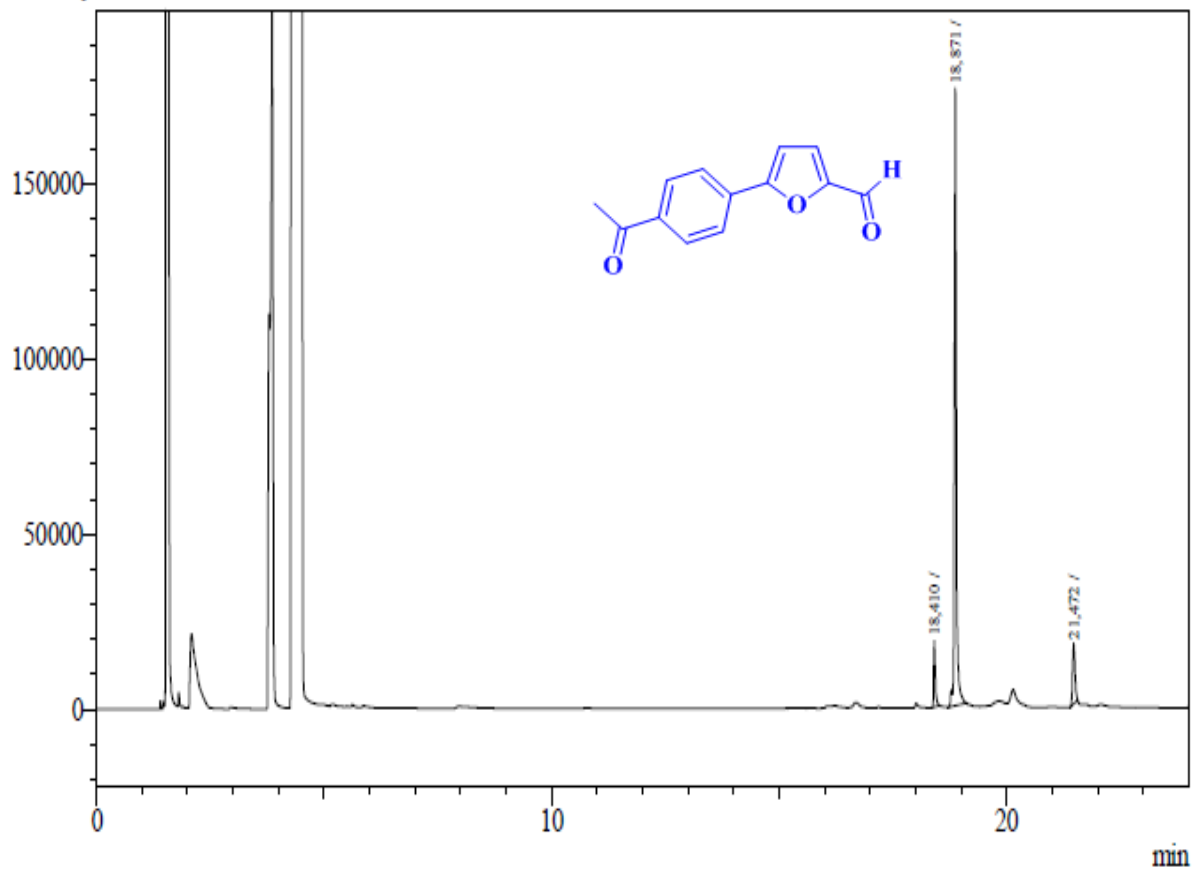

3g

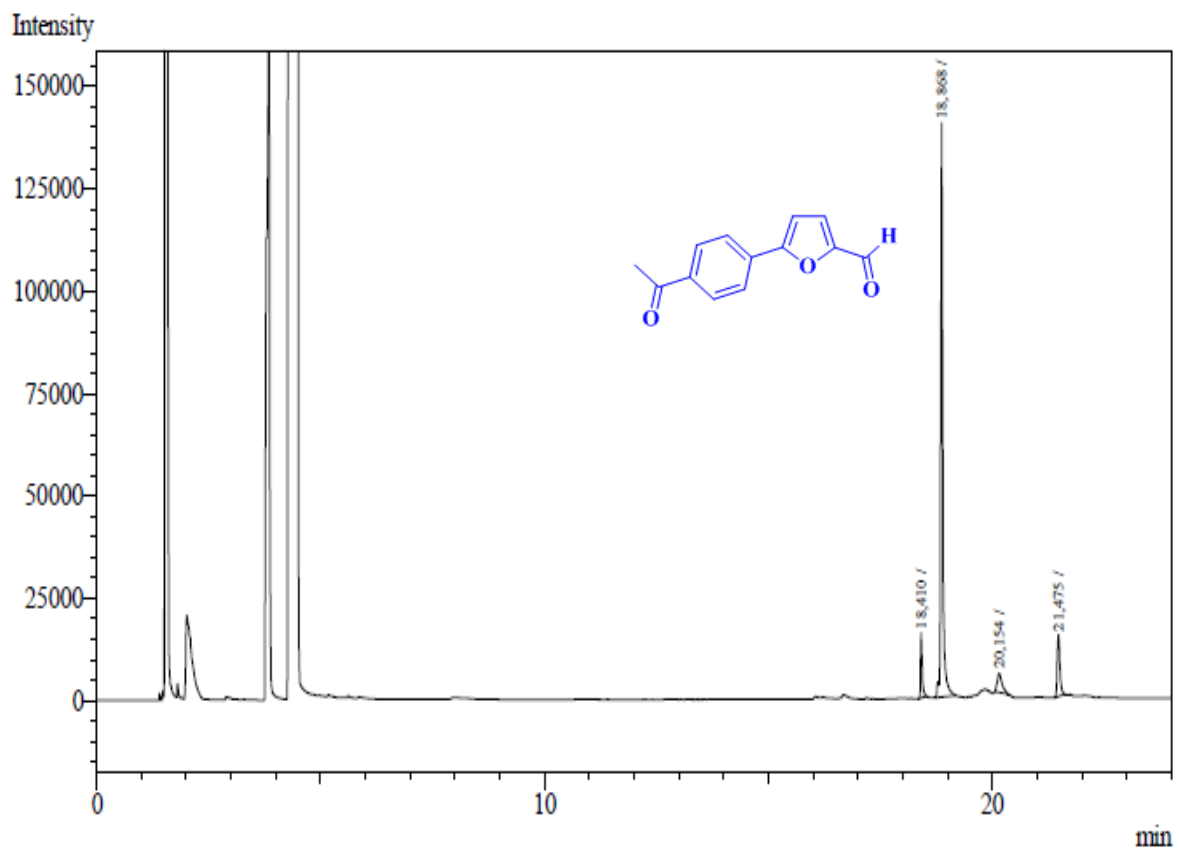

3h

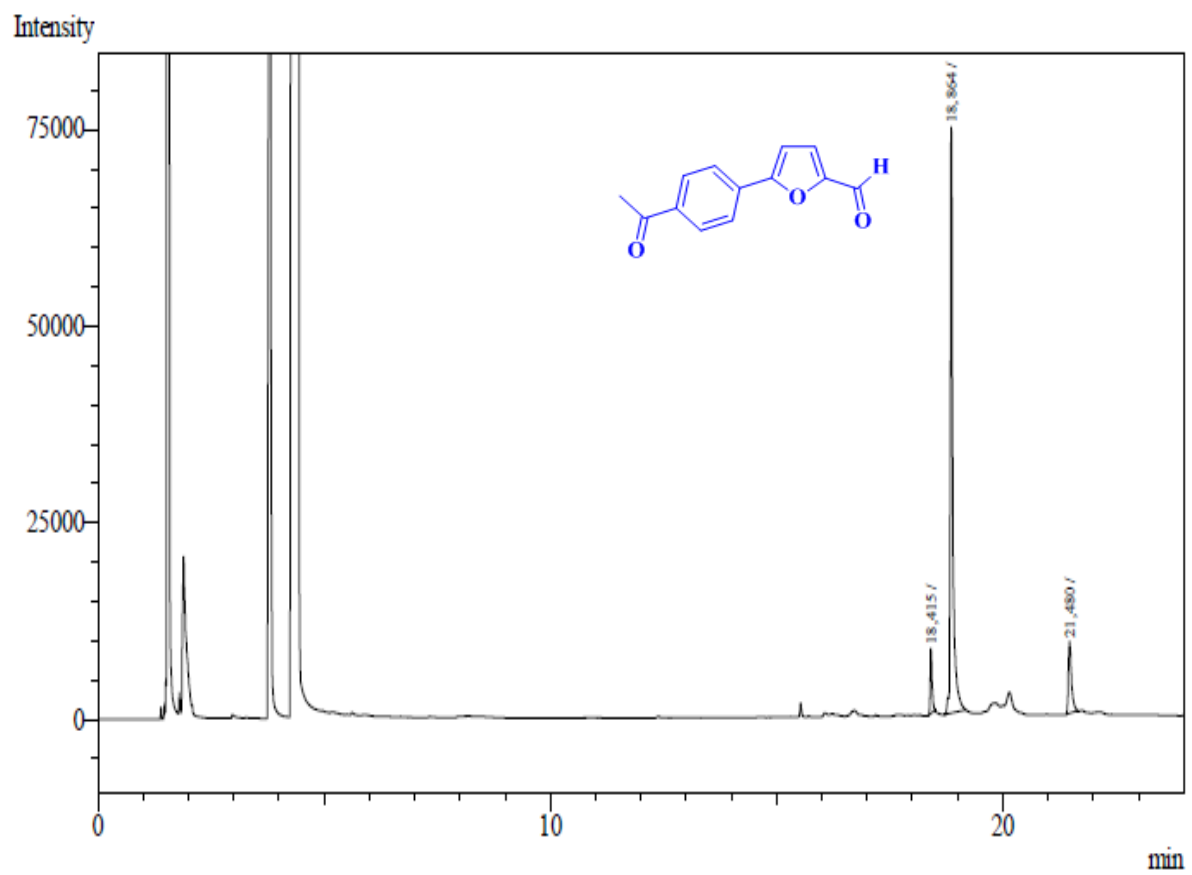

3i

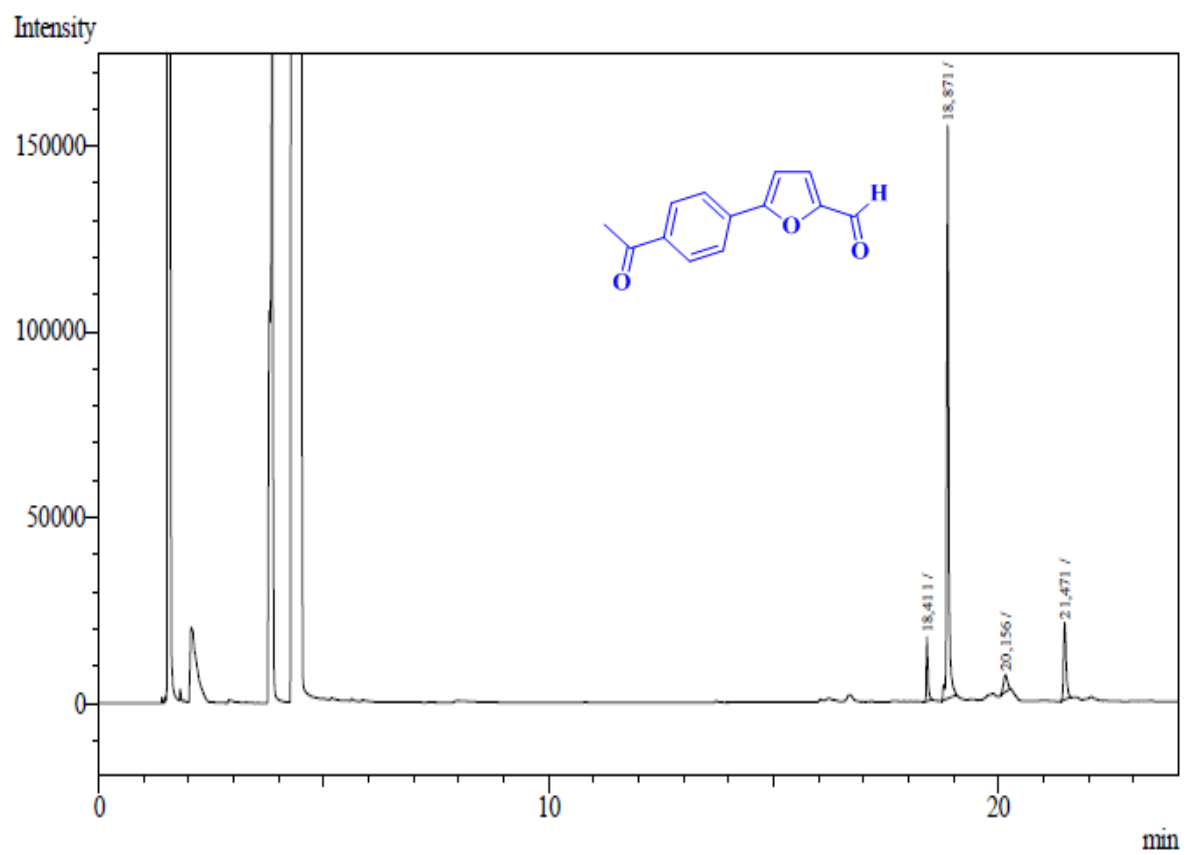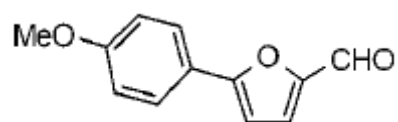

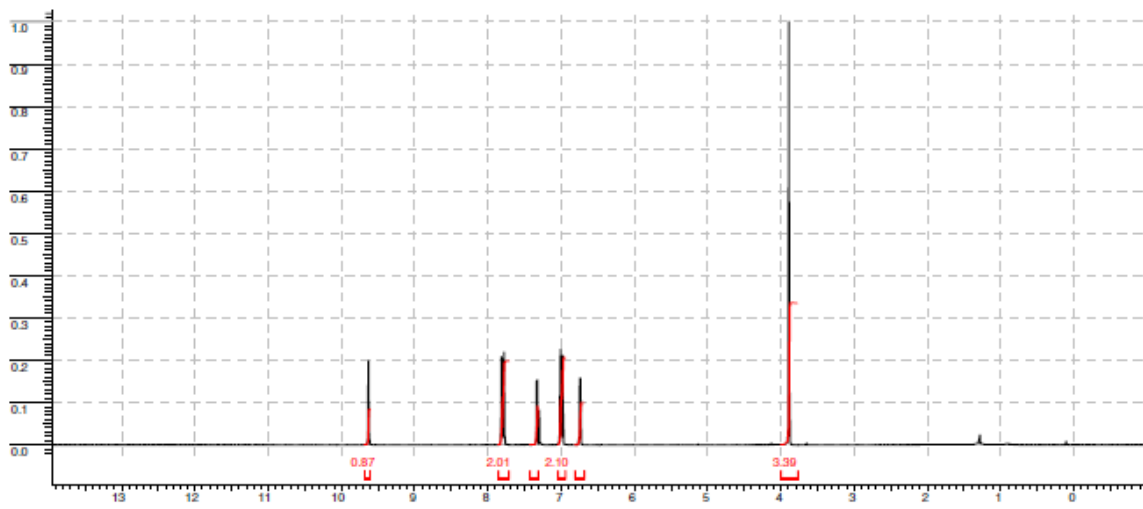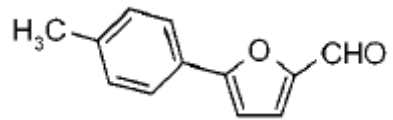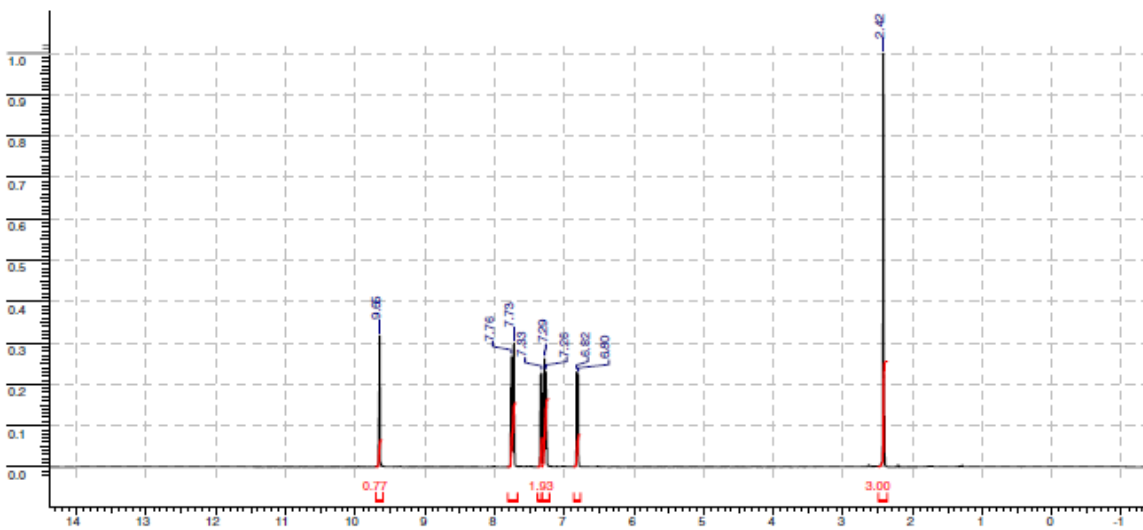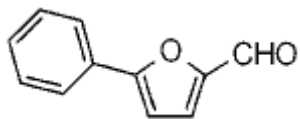

77

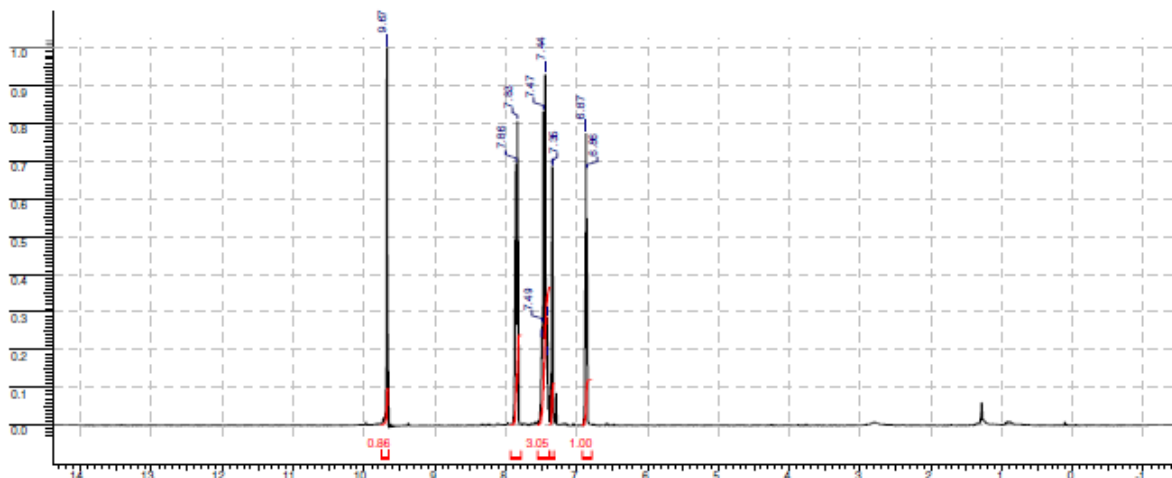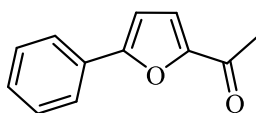

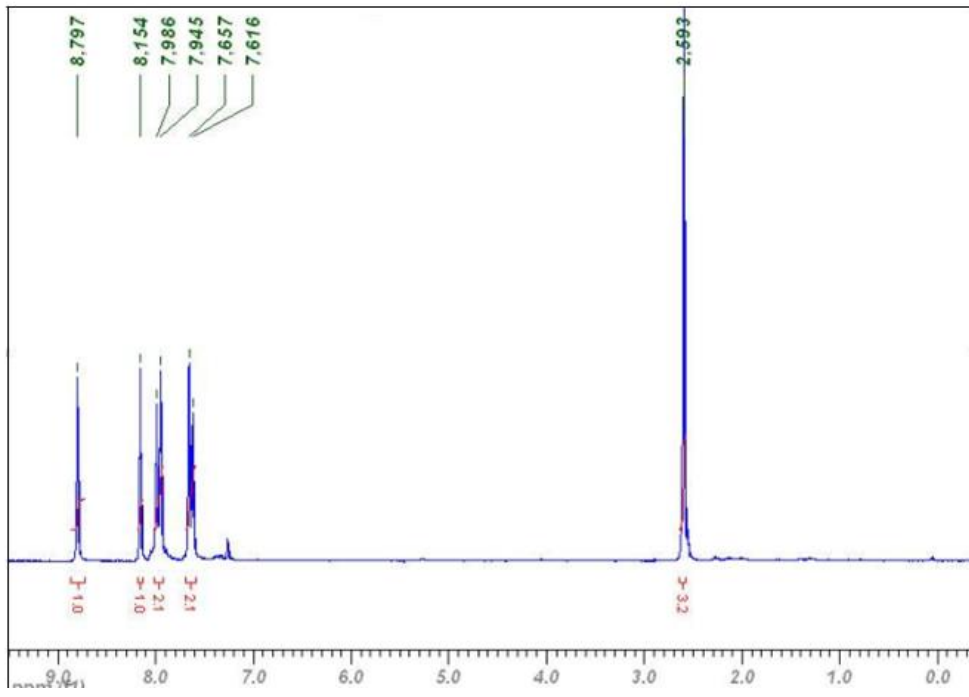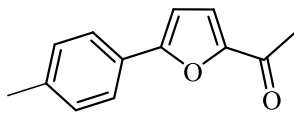

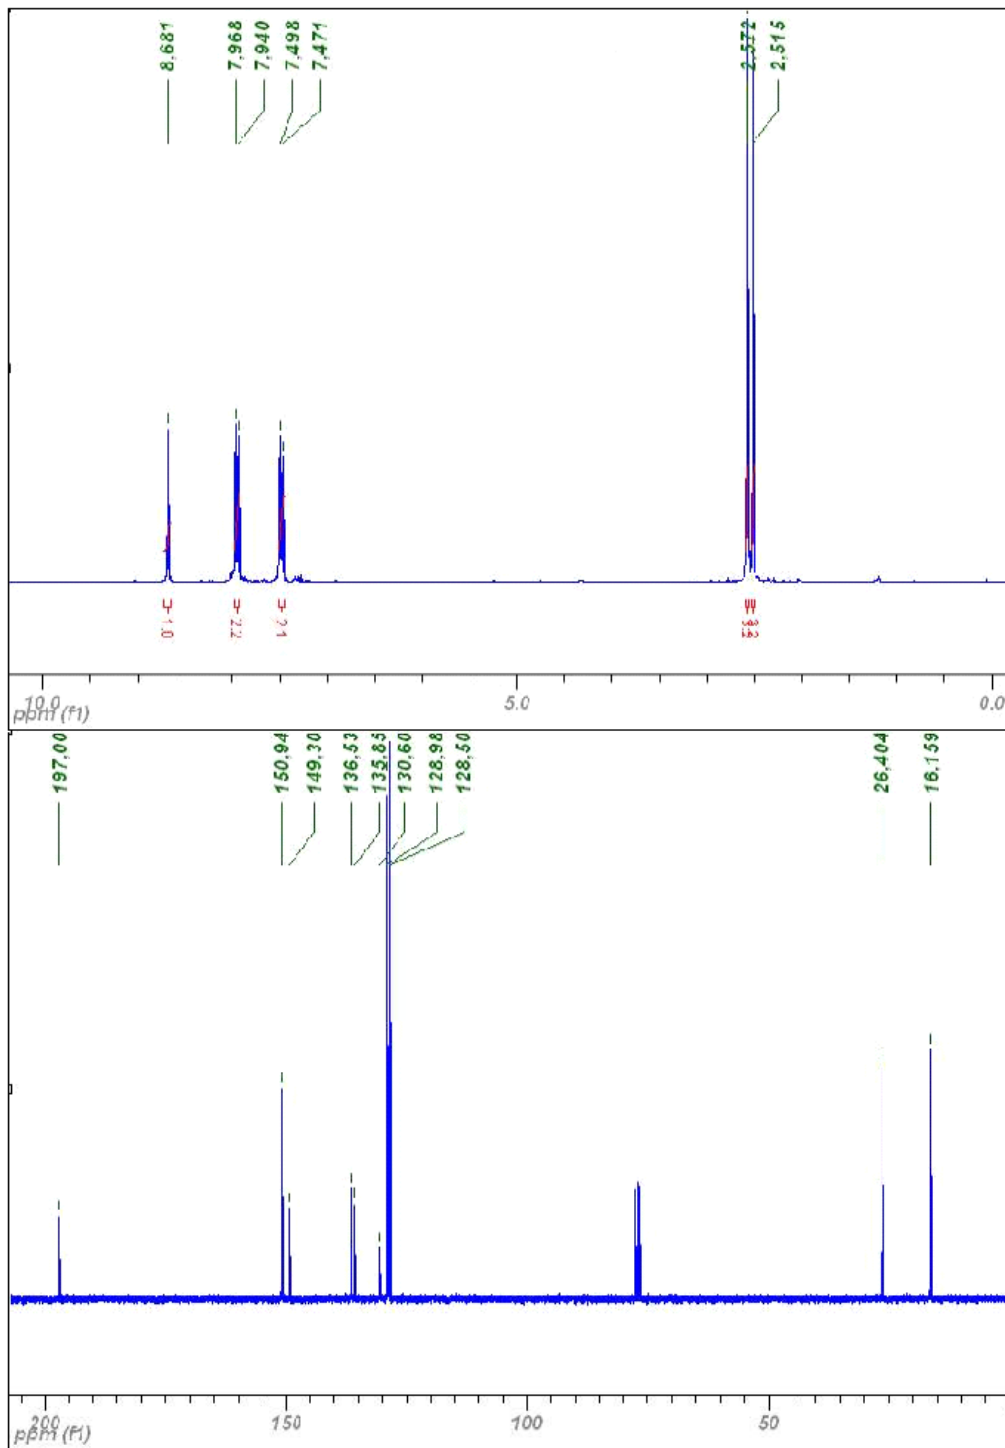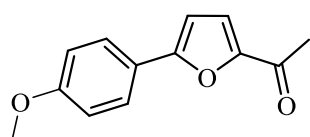



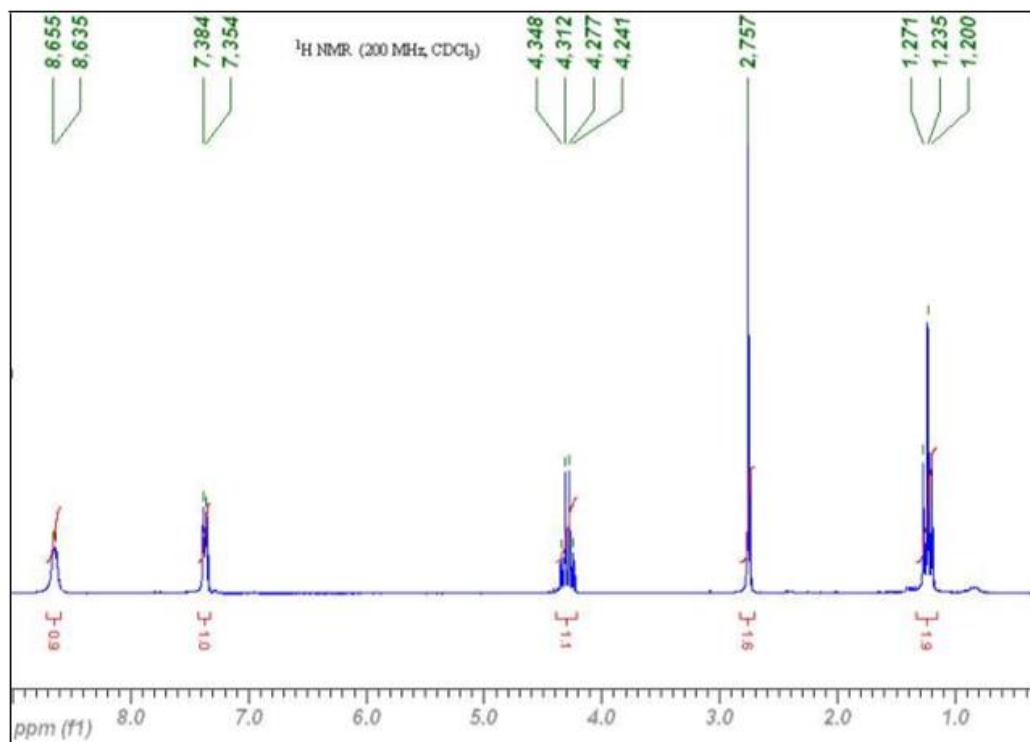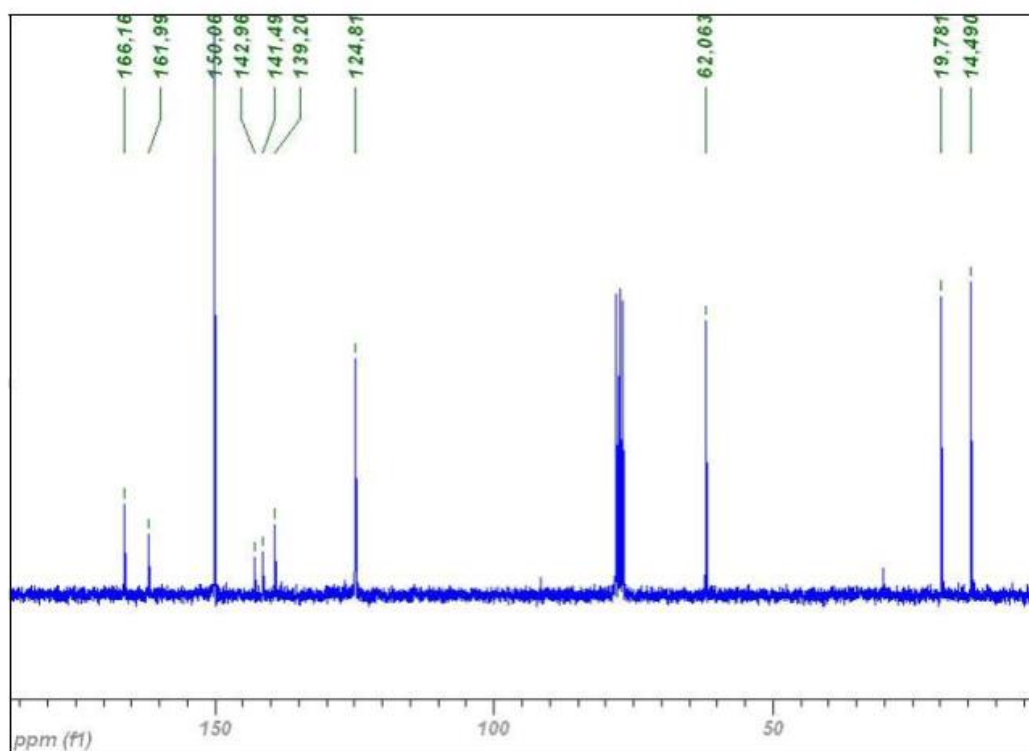

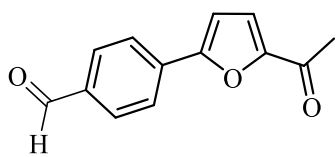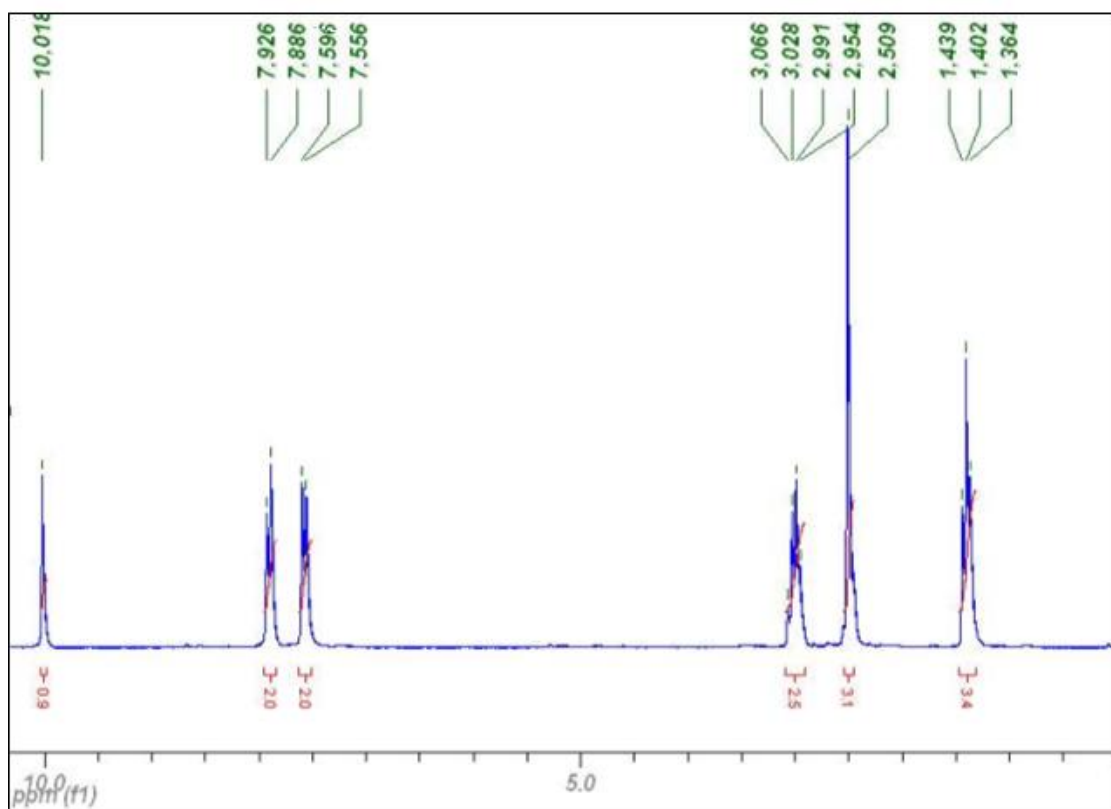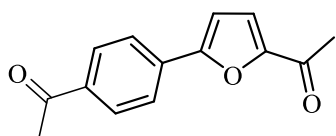

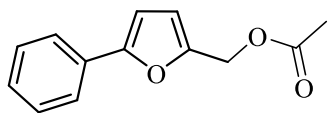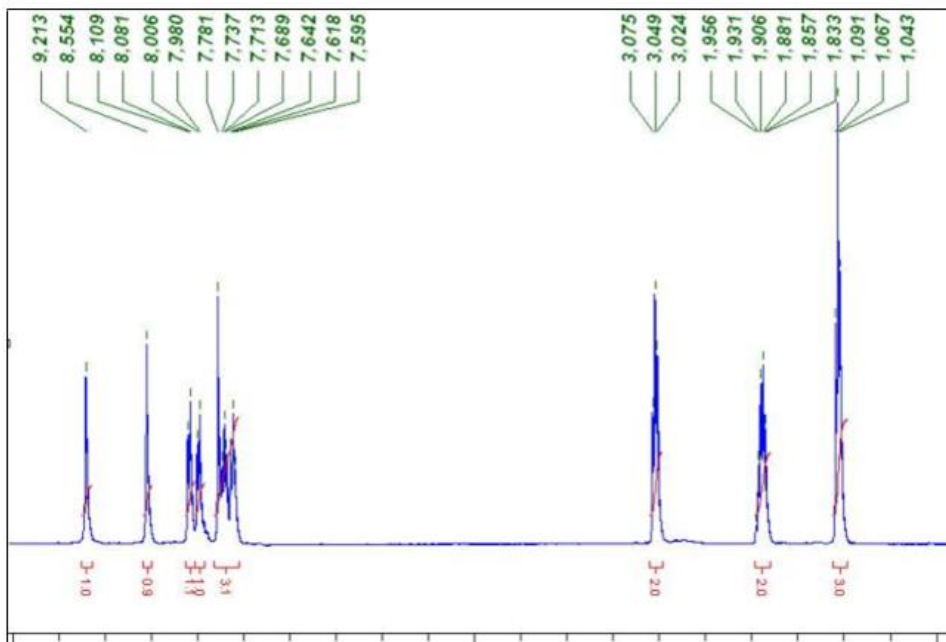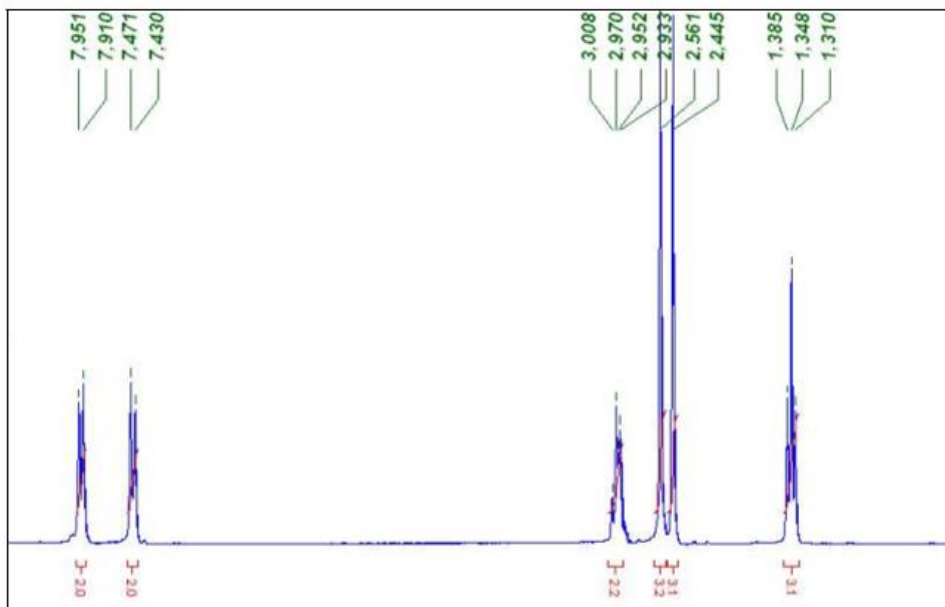

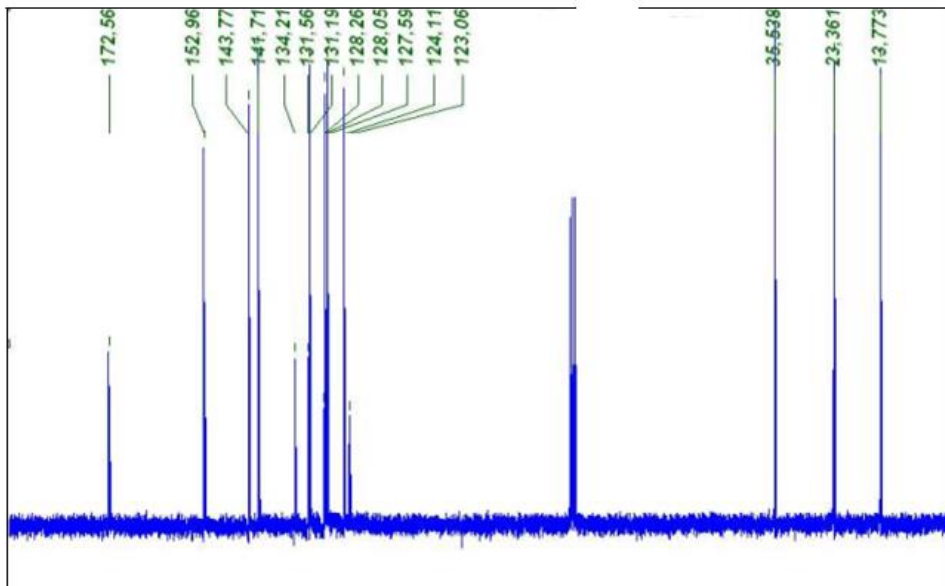

Supplement: d3ra06334h1.pdf [file d3ra06334h1.pdf]
